# Supplementary material for: Nitrogen-Activated CLV3/ESR-Related 4 (CLE4) Regulates Shoot, Root and Stolon Growth in Potato
Source: Preprints.org preprint supplement (doi:10.20944/preprints202308.1955.v1), 2023-08-29

## Supplementary Figures

Supplementary Figure 1. The phenotype of *StCLE4<sub>G6T</sub>* (*StCLE4<sub>G6T</sub>-oe*) overexpressing plants. (a) Plants were grown in vermiculite in the growth chamber for first 2 month under long day and three weeks under short days (b) Apexes of plants that were grown in vermiculite in the growth chamber for three weeks.

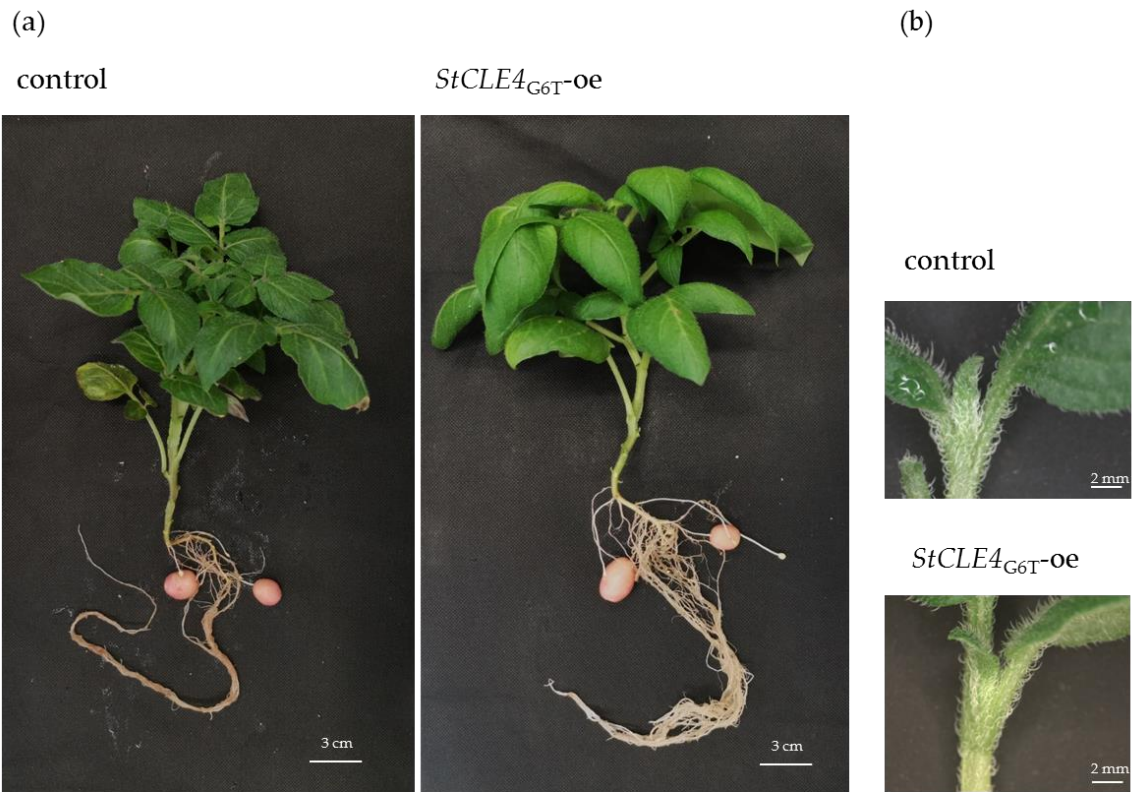

Supplementary Figure 2. Overexpressing *StCLE4* (*StCLE4-oe*) and *StCLE4*<sub>G6T</sub> (*StCLE4*<sub>G6T</sub>-*oe*), and control plants that were grown in the field. Red arrowheads indicate stolons that transformed into branches

*StCLE4-oe*

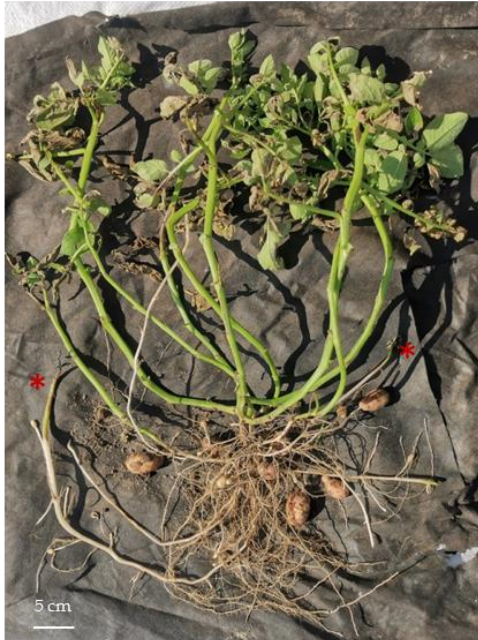

*StCLE4*<sub>G6T</sub>-*oe*

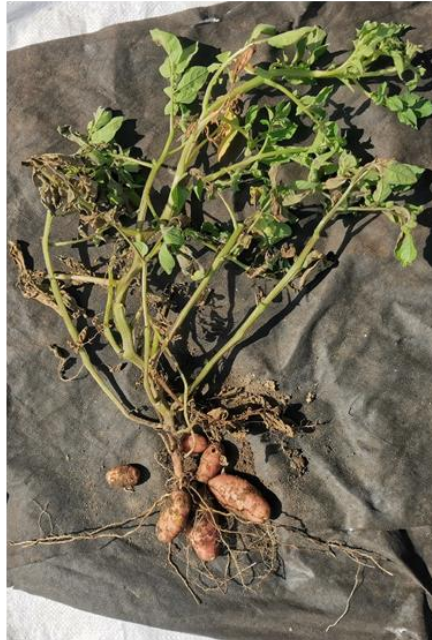

control

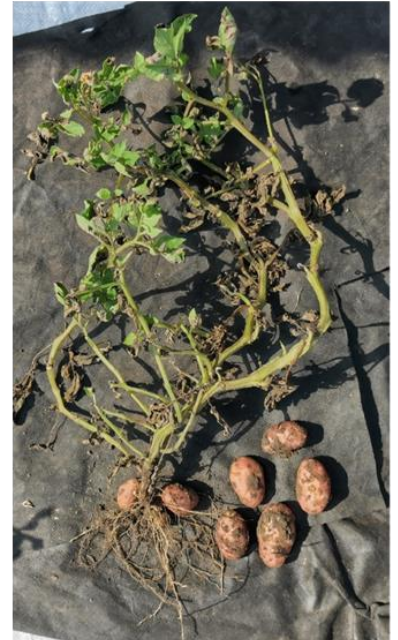

Supplementary Figure 3. Phylogenetic tree of *Arabidopsis thaliana*, *Medicago truncatula*, *Solanum lycopersicum*, *Oryza sativa*, *Lotus japonicas*, and *Solanum tuberosum* (red) NLP protein families. Alignment was done by MEGA7 software with the muscle algorithm using the AA sequences of NLP proteins. A phylogenetic tree with 1,000 bootstrap replicates was constructed using MEGA7 neighbor-joining method with default parameters.

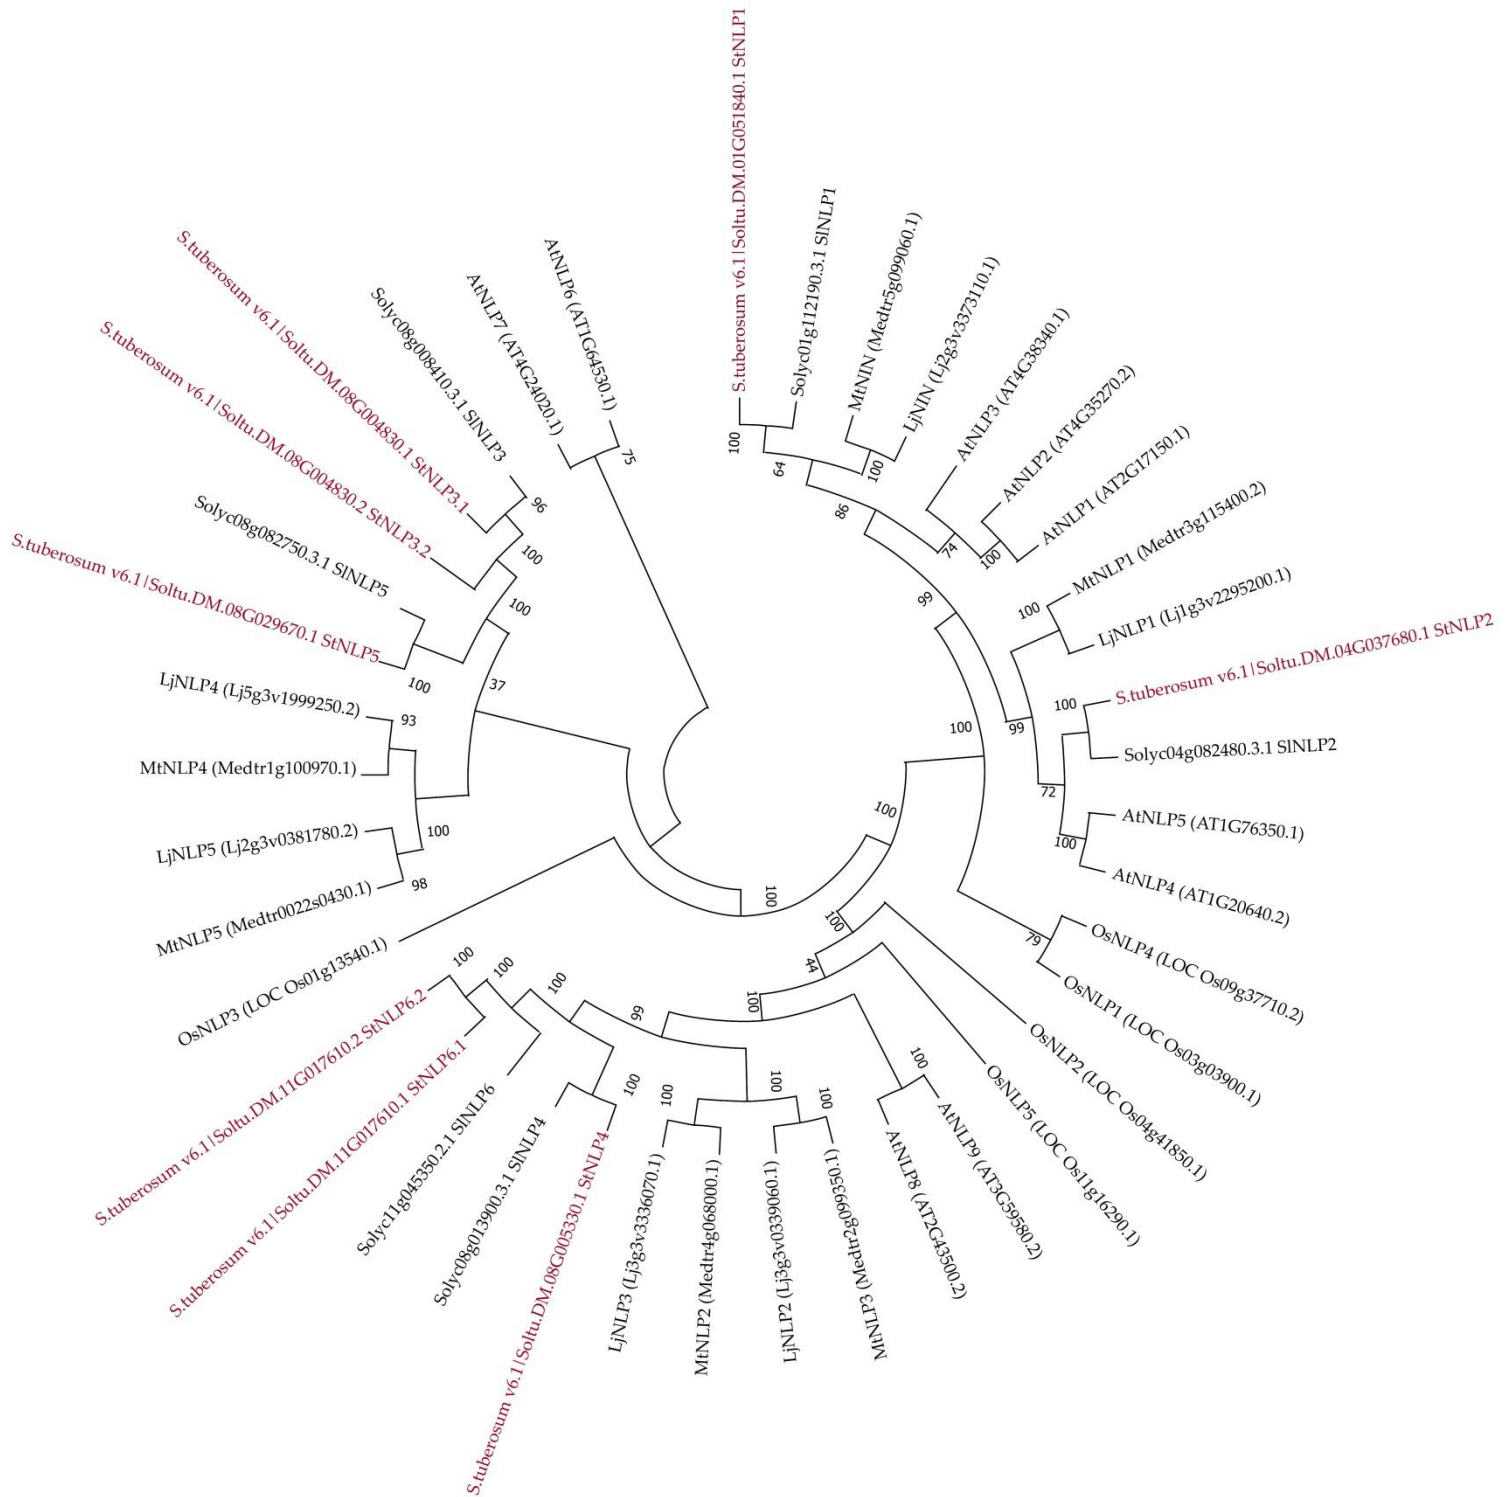

Supplement: Supplementary file 1 [file supplementary]
