# Supplementary material for: Nitrogen-Activated CLV3/ESR-Related 4 (CLE4) Regulates Shoot, Root and Stolon Growth in Potato
Source: Preprints.org preprint supplement (doi:10.20944/preprints202308.1955.v1), 2023-08-29
Supplement: Supplementary file 2 [file supplementary]

Table S2: List of primers. AttB sites for GateWay cloning are highlined.

|                            |   |                                                                              |                |
|----------------------------|---|------------------------------------------------------------------------------|----------------|
| <i>promStIT1</i>           | F | <u>GGGGACAAGTTTGTACAAAAAAGCAGGCT</u><br>GATCTGCCACATAACATAACAAATG            | Y1H            |
| <i>promStIT1</i>           | R | <u>GGGGACCACTTTGTACAAGAAAGCTGGGT</u><br>TGCTCATATAAAACTTGGGATCAC             | Y1H            |
| <i>promStBEL5 region_1</i> | F | <u>GGGGACAAGTTTGTACAAAAAAGCAGGCT</u><br>AGATGAAACCAATAAAGATTAGCA             | Y1H            |
| <i>promStBEL5 region_1</i> | R | <u>GGGGACCACTTTGTACAAGAAAGCTGGGT</u><br>CCAAGAAATGAAAGTACACTGC               | Y1H            |
| <i>promStBEL5 region_2</i> | F | <u>GGGGACAAGTTTGTACAAAAAAGCAGGCT</u><br>CATTGTACCATTGCGTCACG                 | Y1H            |
| <i>promStBEL5 region_2</i> | R | <u>GGGGACCACTTTGTACAAGAAAGCTGGGT</u><br>ACTTGAAAGATGAAAGGTGCGT               | Y1H            |
| <i>StNLP5 cds</i>          | F | <u>GGGGACAAGTTTGTACAAAAAAGCAGGCT</u><br>ATGAATTTCATTTTCCGTTCAAAGCCT          | Y1H            |
| <i>StNLP5 cds</i>          | R | <u>GGGGACCACTTTGTACAAGAAAGCTGGGT</u><br>TCATTCACCTGAGCTCTCACAGG              | Y1H            |
| <i>StNLP3 cds</i>          | F | <u>GGGGACAAGTTTGTACAAAAAAGCAGGCT</u><br>ATGTCGGAACCGGAAGGAGG                 | Y1H            |
| <i>StNLP3 cds</i>          | R | <u>GGGGACCACTTTGTACAAGAAAGCTGGGT</u><br>TCATTTACCTGAGCTCTCACAGGAG            | Y1H            |
| <i>promStCLE4 region_1</i> | F | <u>GGGGACAAGTTTGTACAAAAAAGCAGGCT</u><br>TAACACTCCTATAAAGCAAGAACTC            | Y1H            |
| <i>promStCLE4 region_1</i> | R | <u>GGGGACCACTTTGTACAAGAAAGCTGGGT</u><br>TAATTCTTGAATAATTAATGATATATATCTAAGGTT | Y1H and<br>GUS |
| <i>promStCLE4 region_2</i> | F | <u>GGGGACAAGTTTGTACAAAAAAGCAGGCT</u><br>GCAGCCGACATCAAATAGAAG                | Y1H            |
| <i>promStCLE4 region_2</i> | R | <u>GGGGACCACTTTGTACAAGAAAGCTGGGT</u><br>GGACCTTAGTTTAGTTAAAATGTG             | Y1H            |
| <i>StCLE4 cds</i>          | F | <u>GGGGACAAGTTTGTACAAAAAAGCAGGCT</u><br>ATGGCTAGTGCTTCTAGGTTTTTGT            | Overexpr.      |
| <i>StCLE4 cds</i>          | R | <u>GGGGACCACTTTGTACAAGAAAGCTGGGTC</u><br>TAGTGATGTCGAGGATCAGGTCC             | Overexpr.      |
| <i>StCLE4 G6T cds</i>      | R | <u>GGGGACCACTTTGTACAAGAAAGCTGGGTC</u><br>CTAGTGATGTCGAGGATCAGGTGTGTCAGGAC    | Overexpr.      |
| <i>promStCLE4</i>          | F | <u>GGGGACAAGTTTGTACAAAAAAGCAGGCT</u><br>CTCATAAATCCCTAACATAGGTAAATAAT        | GUS            |
