# Supplementary material for: Nitrogen-Activated CLV3/ESR-Related 4 (CLE4) Regulates Shoot, Root and Stolon Growth in Potato
Source: Preprints.org preprint supplement (doi:10.20944/preprints202308.1955.v1), 2023-08-29
Supplement: Supplementary file 3 [file supplementary]

Table S3: Potential NRE sites in promoter regions of StCLE4, StBEL5, StIT1, which were used for yeast-one-hybrid analyses. Ref- reference genome v6.1 for the doubled monoploid potato DM 1-3 516 R44. Highline sequences have alterations in Desiree genome.

>pCLE4\_region\_1\_ref

TAACACTCCTATAAAGCAAGAACTCATGAAATTAATAAGCATACAAATAAATATTGATAATATA  
GATATCCATATAATTATTCGTCTGAATATTTATCTTTTAGCGAATAATATATATCCATTTGTATTCA  
TTTTTTAAAGAATCGATTATTCGATCACTTTAAATAGTTACTCATTTTTTATATCAAAAAGGTGCAT  
TAAAAAAATTCAGGTTGACAACCTGAATAGCTAGTACTAATATAATTCTCTTTGATCAGGTCAA  
ATGGCCTAAAGGGTATAATACAAAAAAGTTTGTTTTAAACAAGTTATCAAATCACTATTACACT  
TTTCGTTACATTTTTTAGCACTTATCTTATTTGATTGTGAACCCACCTTGTCATAATATTATATAC  
TATGAATATTTAGGACTATATATATAGTTCAATAATCACAACACAATATAACTCTCTTCATTTTCAT  
GCAACCTTAGATATATATCATTAAATTATTCAAGAATTA

>pCLE4\_region\_1\_Desiree

TAACACTCCTATAAAGCAAGAACTTATGAAATTAATACACATACAAATAAGTATTGATAATATA  
ACTATTCATATAATTATTCGTCTGAATATTTATTTTTAGTGAATAATATATATCCATTTTTTCGTATT  
CATTTTTAAAGAATCAATTATCCAACCTCATATCTAATGGATCAGTTTAAATAGTTACTCATTTTTA  
AAACCATTTTTGCTAGGCTGCATACCAAAAAGGTGCATTAAAAAATTCAGGTTGACAACCTTGAA  
TGGCTAGTACTAATATAATTCTCTTTGATCAGGTCAAATGGCCTAAAAAGTAGAATACAAAAAA  
TGTTTGTTTTAAACAAGTTATCAAATCACTATTACACTTTTCTTCTCATTTTTAGCACTTTATCTTA  
TTTGATTGTGAACCCCCCTTGTCATAATATTATATACTATGAATATTTAGGACTATATATATAGTT  
CAATAATCACAACACAATATAACTATCTTCATTTTCATGCAACCTTAGATATATATCATTAAATTAT  
TCAAGAATTA

>pBEL5\_region\_2\_ref

CATTGTACCATTGCGTCACGCTAATATAAGTAACTTTTAAGAAGAAAGAGAGACTTTCTTACTC  
ATCACATTACTTAGTCAATTTTTTTTTAAAGAAAAATCTCTTTTCCTATTTAGCAACTATTTGATT  
CAAATTTCCACATAAATCTCAAATATTACAATGTTAAAAAACATTTTGAAGTATTTGATTAAAAAG  
TTTTTTTTTTTTTTACTTTCTTAAATTACGTGTCAAATTAAGATGACAAACAAATTAAATTTGG  
AGAGTACTAGAAAATAAGAAATTGACGATGTATAAAATTTTGTAGCTAAATAAAAAAAATTCTA  
TACTAATTTTATTTAGCTACAAAATAAAGATGAATTATAAGAAAATCCAATTAGCTTGGAACGTT  
TTATAAATAAATTAAGTATGAATTGTCCATAAATTCTATAGGAGAACAAAAATGTTGCCCTTA  
CATCACTCCACAATTTACC

>pBEL5\_region\_2\_Desiree

CATTGTACCATTGCGTCACGCTAATATAAGTAACTTTTAAGAAGAAAGAGAGACTTTCTTACTC  
ATCACATTTACTTAGTCAATTTTTTTTTAAAGAAAAATCTCTTTTCCTATTTAGCAACTATTTGATT  
CCAAATTTCCACATAAATCTCAAATATTACAATATTAAAAAATATTTTGAAGCATTGATTAAAA  
GATTTAATTTTTTTACTTTCTTAAATTATGTGTCAAATCAAATAATACAAACAAATTAAATTTG  
GAGAGTACTAGAAAATAAGAAATTGACGATGTATAAAATTTTGTAGCTAAATTAAATATTCTA  
TACTAATTTTATTTAGCTACAAAATAAAGATAAATTATAAGAAAATTCATTAGCTCGGAACGTT  
TTATAAATAAATTAGCTATGAATTGTCCATAAATTCTATAGGAGAAGAAAAATGTTGCCCTTAC  
ATCACTCCACAATCTACC

>pBEL5\_region\_1\_ref

AGATGAAACCAATAAAGATTAGCAGTACATTTTTCTTCAATTGGTTTCACAATTAATCACTTTACT  
AATCGTTATCTCAGAAAGTCTATTTTAAATGTTATCTTCGTTTACTTTTACTTATTAAATTTACTAAA  
AAGAAATTTAAGAAGTCATGTTTTCTTCAACGTTAATTATTTATTTTCAATTTTTTCCATTAC  
CAAAAGATATACATCCATTAGTAGGAGTATCGTTATAAAATGTTTATGTCAATCATTTTTTTTTAA  
AGGATCCGTAAAAATTAAATTAACAAGTAAAAATAAATGGTGGAAGTATATATATTCAATAC  
ACAAAGCAGTGTACTTTCATTTCTTGG

>pBEL5\_region\_1\_Desiree

AGATGAAACCAATAAAGATTAGCAGTACATTTTTCTTCAATTGGTTTCACAATTAATCACTTTACT  
AATCGTTATTATCTCAGAACCTTCGTTTACTTTTACTTATTAAATTTACTAAAAAGAAATTTAAGA  
AATCATGTTTTACCTTCAACGTTAATTATTTATTTTCAATTTTTTCCATTACCAAAAGATATACA  
TCCATTAGTAGGAGTATCGTTATAAAATGTTTATGTCAATCATTTTTTTTTTAAAGGATCCGTAAA  
AATTAAAATTAAACAAGTAAAAAAAAAATGGTGGAAGTACATATATTCAATACACAAAGCAGTGT  
ACTTTCATTTCTTGG

>pIT1\_Ref

GATCTGCCACATAACATAACAAATGGTTTCAAACGGAACATATGACTCTTAATAAAAGGTGGAG  
AAGGGTTGAAAACCTTTACTAAATTTAACAAGATCTTAGGTGTGTATTTGACTCATGTTGCAAGATT  
GAAGTGTATTTAAGTTCAGTTAATCAAGTAAAGAGATATTTTAAAGGTTGTCAATATATAATTCCG  
AGATAAAACTAGCCTTTTGTTTCATTTGTTGAGTTTAAAATTAAGTTGATATGAAACAACAAATA  
AATTGTGATCCCAAGTTTATATGAGCA

> pIT1\_Desiree

GATCTGCCACATAACATAACAAATGGTTTCAAACGGAACATATGACTCTTAATAAAAGGTGGAG  
AAGGGTTGAAAACCTTTACTAAATTTAACAAGATCTTAGGTGTGTATTTGACTCATGTTGCAAGATT  
GAAGTGTATTTAAGTTCAGTTAATCAAGTAAATAGATATTTTAAAGGTTGTCAATATATAATTCCG  
AGATAAAACTAGCCTTTTGTTTCATTTGTTGAGTTTAAAATTAAGTTGATATGAAACAACAAATA  
AATTGTGATCCCAAGTTTATATGAGCA
