# Supplementary material for: Nitrogen-Activated CLV3/ESR-Related 4 (CLE4) Regulates Shoot, Root and Stolon Growth in Potato
Source: Preprints.org preprint supplement (doi:10.20944/preprints202308.1955.v1), 2023-08-29
Supplement: Supplementary file 4 [file supplementary]

Archive with 4 entries (4 files):
- Figures S1-3.pdf
- Table S1.xlsx
- Table S2.pdf
- Table S3.pdf
