# Supplementary material for: Nitrogen-Activated CLV3/ESR-Related 4 (CLE4) Regulates Shoot, Root and Stolon Growth in Potato
Source: Preprints.org preprint supplement (doi:10.20944/preprints202308.1955.v1), 2023-08-29
Supplement: Supplementary file 4 [file supplementary › Table S1.xlsx]

## Sheet: TPMs
transcript_id	CLE4(G6T)1_+N_leaf	CLE4(G6T)1_+N_root	CLE4(G6T)2_+N_leaf	CLE4(G6T)2_+N_root	CLE4(G6T)4_+N_root	CLE4(G6T)5_+N_leaf	CLE4(G6T)5_+N_root	CLE4oe1_-N_leaf	CLE4oe1_-N_root	CLE4oe2_-N_leaf	CLE4oe2_-N_root	CLE4oe3_-N_leaf	CLE4oe4_-N_leaf	CLE4oe4_-N_root	Control1_-N_leaf	Control1_-N_root	Control1_+N_leaf	Control1_+N_root	Control2_-N_leaf	Control2_-N_root	Control2_+N_leaf	Control2_+N_root	Control3_-N_leaf	Control3_-N_root	Control3_+N_leaf	Control3_+N_root	Control4_-N_leaf	Control4_-N_root	Control4_+N_leaf	Control4_+N_root
Soltu.DM.06G018750.1	0	0	0	0	0	0	0	0	0	0	0	0	0	0	0	0	0	0	0	0	0	0	0	0	0	0	0	0	0	0
Soltu.DM.04G007160.3	0	0	0	55	0	0	0	35	0	0	0	26	0	0	0	0	9	27	0	0	0	5	3	0	0	5	20	0	23	0
Soltu.DM.04G007160.2	718	372	403	318	381	439	366	850	390	428	458	506	301	428	524	365	354	495	608	296	309	440	446	278	340	320	436	415	494	330
Soltu.DM.04G007160.1	0	0	0	0	0	0	0	18	0	0	0	0	0	0	0	4	0	0	0	0	0	5	4	4	0	23	5	0	18	0
Soltu.DM.08G017450.1	0	0	0	0	0	0	0	0	5	0	0	0	0	0	0	0	0	0	0	0	0	0	0	0	0	0	0	0	0	0
Soltu.DM.07G009590.1	0	0	0	0	0	0	0	0	0	0	0	0	0	0	0	0	0	0	0	0	0	0	0	0	0	0	0	0	0	0
Soltu.DM.01G038980.1	274	87	102	92	86	93	137	272	120	116	169	106	169	149	208	59	93	15	285	113	24	96	190	116	88	118	247	88	142	75
Soltu.DM.01G038980.2	134	95	73	5	67	92	5	130	59	51	35	133	51	49	101	25	49	94	152	7	80	6	142	6	53	40	127	84	84	34
Soltu.DM.01G038980.3	20	0	0	0	0	23	0	11	0	0	0	14	0	0	2	0	0	0	0	18	4	0	12	0	0	0	0	51	0	0
Soltu.DM.01G038980.4	0	0	0	0	0	5	0	0	0	0	0	0	0	0	0	0	0	0	0	0	0	0	0	0	0	0	0	0	0	0
Soltu.DM.10G026840.1	89	274	54	189	148	49	155	115	179	67	182	18	23	184	110	180	121	303	99	112	88	202	28	123	23	72	44	173	182	55
Soltu.DM.10G026840.2	6	6	0	18	49	8	13	15	67	6	13	30	7	6	9	12	8	24	7	41	14	30	12	9	99	124	10	26	13	96
Soltu.DM.05G019790.1	0	0	0	0	0	0	0	0	0	0	0	0	0	0	0	0	0	0	0	0	0	0	0	0	0	0	0	0	0	0
Soltu.DM.09G027820.1	0	0	0	0	0	0	0	0	0	0	0	0	0	0	0	0	0	0	0	0	0	0	0	0	0	0	0	0	0	0
Soltu.DM.10G012730.1	0	0	0	0	0	0	0	0	2	0	0	0	0	0	0	0	0	0	0	0	0	0	0	0	0	0	0	0	0	0
Soltu.DM.09G010860.1	0	0	0	0	0	0	0	0	0	0	0	0	0	0	0	0	0	0	0	0	0	0	0	0	0	0	0	0	0	0
Soltu.DM.03G023130.1	0	64	0	25	15	0	32	0	19	0	0	0	0	3	0	4	0	52	0	16	0	45	0	6	0	18	0	0	0	20
Soltu.DM.04G032230.1	860	653	390	395	529	397	556	950	502	497	615	565	310	561	849	441	493	724	1230	475	473	569	716	411	460	536	834	595	495	449
Soltu.DM.03G007560.1	0	0	0	0	0	0	0	0	3	0	0	0	0	0	0	0	2	2	0	0	0	0	0	0	0	0	0	0	0	0
Soltu.DM.11G004150.1	1718	233	402	478	255	496	451	2347	315	1006	1336	871	861	1515	20702	1281	8871	751	9376	1044	3833	451	4499	1006	3833	619	6201	1522	4356	386
Soltu.DM.03G010980.1	0	152	97	122	125	99	138	212	146	105	194	159	105	178	196	150	0	140	206	156	69	130	132	121	126	148	167	199	182	124
Soltu.DM.11G004150.2	0	0	0	0	0	0	0	0	0	0	0	0	0	0	0	0	0	0	0	0	0	0	55	0	0	0	0	0	0	0
Soltu.DM.07G008060.1	0	0	0	4	0	0	0	0	0	0	0	0	0	0	0	0	0	0	0	0	0	0	0	0	0	0	0	0	0	0
Soltu.DM.05G013570.1	0	0	0	0	0	0	0	0	2	0	0	0	0	0	0	0	0	0	0	0	0	0	0	0	0	0	0	0	0	0
Soltu.DM.05G026430.1	308	37	153	46	55	280	43	186	34	37	89	90	122	50	157	61	216	56	286	31	200	41	72	42	281	50	257	71	352	26
Soltu.DM.11G023500.1	468	118	282	257	350	219	251	2270	798	1174	5762	2381	824	2927	1052	2533	146	185	1046	2567	67	128	961	4013	94	127	1262	4099	204	197
Soltu.DM.07G012730.1	0	0	5	0	0	0	0	0	4	0	5	0	0	0	0	3	0	0	5	0	0	7	0	0	0	0	0	0	0	0
Soltu.DM.01G004910.1	23	9	10	6	4	6	4	45	2	28	11	13	10	8	27	22	10	7	31	9	8	1	13	10	2	2	33	7	10	8
Soltu.DM.12G028010.1	0	0	0	0	0	0	0	0	4	0	0	0	0	0	0	0	0	0	0	0	0	0	0	0	0	0	0	0	0	0
Soltu.DM.10G003010.2	593	372	269	229	427	225	390	576	279	308	381	402	178	387	319	428	68	303	160	174	37	379	231	404	58	310	314	616	32	204
Soltu.DM.04G008910.1	0	0	0	0	0	0	0	0	0	0	0	0	0	0	0	0	0	0	0	0	0	0	0	0	0	0	0	0	0	0
Soltu.DM.10G003010.1	31	25	0	10	42	22	14	27	2	13	22	33	0	0	2	21	62	18	121	162	47	0	0	0	83	19	32	0	119	179
Soltu.DM.08G027730.1	499	298	234	226	272	209	287	447	338	219	378	231	146	388	310	329	249	283	278	211	188	290	268	288	239	191	272	390	282	211
Soltu.DM.04G002130.2	951	658	101	216	282	318	326	523	419	227	256	232	219	637	425	112	202	319	997	222	301	527	520	241	126	0	283	387	405	592
Soltu.DM.04G002130.1	3053	2315	1811	1892	2334	1799	1892	2867	1342	1730	3065	2205	1235	2435	2064	2294	1631	2349	3276	1895	1508	1854	2329	1933	1920	2164	2410	2551	2432	1611
Soltu.DM.07G016030.1	4	82	0	61	98	0	73	3	29	4	22	0	0	13	3	70	3	178	4	32	0	113	0	8	0	23	0	66	0	56
Soltu.DM.01G027710.1	0	0	0	0	0	0	0	0	0	0	0	0	0	0	0	0	0	0	0	0	0	0	0	0	0	0	0	0	0	0
Soltu.DM.05G009950.1	7	0	0	0	0	9	0	0	0	0	0	4	0	0	0	0	0	0	0	0	0	0	0	0	0	0	0	0	0	0
Soltu.DM.04G032860.1	0	0	0	0	0	0	0	0	0	0	0	0	0	0	0	0	0	0	0	0	0	0	0	0	0	0	0	0	0	0
Soltu.DM.09G008020.1	1122	863	503	605	759	610	619	1133	243	653	788	758	525	738	882	650	678	860	1263	577	576	782	901	596	608	702	783	798	722	627
Soltu.DM.04G008890.1	0	0	0	0	0	0	0	0	0	0	0	0	0	0	0	0	0	0	0	0	0	0	0	0	0	0	0	0	0	0
Soltu.DM.10G000310.1	0	0	0	0	0	0	0	0	2	0	0	0	0	0	0	0	0	0	0	0	0	0	0	0	0	0	0	0	0	0
Soltu.DM.09G023880.1	5394	1637	2897	1132	1558	2488	1450	5187	1036	3119	1709	3317	1801	1666	3115	1358	1979	2285	2386	1259	1414	1777	1562	1253	1587	1460	1968	1593	2433	1590
Soltu.DM.02G033070.1	0	0	0	0	0	0	0	0	0	0	0	0	0	0	0	0	0	0	0	0	0	0	0	0	0	0	0	0	0	0
Soltu.DM.05G023860.1	267	212	135	152	165	150	154	219	151	125	267	178	118	278	183	200	109	206	210	148	90	184	141	182	102	131	131	260	150	121
Soltu.DM.12G025780.1	530	261	224	183	240	265	216	333	23	257	129	303	187	195	314	217	173	250	240	177	86	120	267	136	179	227	277	281	343	224
Soltu.DM.01G043840.1	1244	315	352	683	477	664	558	598	116	380	374	449	149	200	347	350	267	1228	491	213	180	707	163	204	261	321	299	449	393	383
Soltu.DM.01G033990.1	4445	1944	1842	1775	1751	1989	1886	4710	2597	2063	2975	2597	2155	3119	2556	2755	1670	2782	3075	1929	1195	2235	1837	2067	1682	1791	2795	2979	2150	1736
Soltu.DM.05G000580.3	331	177	152	82	44	112	39	267	39	88	46	142	109	112	201	95	109	68	225	39	78	108	119	124	71	116	86	167	44	126
Soltu.DM.08G014510.1	0	0	0	0	0	0	0	0	0	0	0	0	0	0	0	0	0	0	0	0	0	0	0	0	0	0	0	0	0	0
Soltu.DM.02G030010.2	2872	1059	534	1041	1075	726	519	2634	1108	637	1354	891	443	1839	1619	1395	1215	2285	2633	1381	752	1912	1241	1007	512	1338	1235	1395	1093	298
Soltu.DM.02G030010.1	2385	2554	1717	1242	1640	1429	1646	3918	1085	2046	2452	2523	1969	2085	3047	1827	1854	1712	5012	1643	2137	1693	2707	1742	2096	1565	2676	1978	2358	1970
Soltu.DM.07G007480.1	0	12	0	31	13	0	15	0	201	0	94	0	0	173	0	129	0	40	0	113	0	23	0	56	0	35	0	114	0	33
Soltu.DM.06G034340.1	0	0	0	0	0	0	0	0	0	0	0	0	0	0	0	0	0	0	0	1	0	0	0	0	0	0	1	0	0	0
Soltu.DM.05G023870.1	2	0	0	0	0	0	2	3	3	0	6	0	0	0	0	3	0	3	0	3	0	7	0	2	0	2	0	2	0	5
Soltu.DM.08G016700.1	0	0	0	0	0	0	0	0	0	0	0	0	0	0	0	0	0	0	0	0	0	0	0	0	0	0	0	0	0	0
Soltu.DM.01G042570.1	0	9	0	7	15	0	17	0	50	0	41	0	0	61	3	26	0	11	0	44	0	12	0	26	0	23	0	44	0	17
Soltu.DM.01G012280.1	0	0	0	0	0	0	0	0	0	0	0	0	0	0	0	0	0	0	0	0	0	0	0	0	0	0	0	0	0	0
Soltu.DM.01G025720.2	0	0	0	0	0	0	0	0	0	0	0	0	0	0	0	0	0	0	0	0	0	0	0	0	0	0	0	63	0	0
Soltu.DM.08G029050.2	57	0	0	276	0	8	0	0	2	0	0	1	0	0	0	0	3	0	0	1	0	0	0	1	0	0	0	0	0	0
Soltu.DM.03G017270.1	22	13	11	21	25	0	8	23	0	0	0	20	0	21	6	23	18	11	16	14	7	15	24	17	0	13	19	23	27	14
Soltu.DM.01G025720.1	6856	4137	3187	2853	3062	3467	3221	5077	966	1857	3539	4135	3062	3378	2449	1299	2403	3405	3761	1686	2697	3051	2849	1926	2878	3222	3055	2450	3919	3004
Soltu.DM.04G025930.1	377	183	152	116	188	179	140	335	261	136	213	175	127	212	211	186	175	215	359	144	134	227	167	143	153	166	295	218	155	124
Soltu.DM.12G017590.1	0	0	0	4	0	0	0	0	10	3	3	5	0	0	5	0	0	0	0	0	0	5	0	0	0	4	0	0	0	0
Soltu.DM.11G001510.1	0	0	0	0	0	0	0	0	0	0	0	0	0	0	0	0	0	0	0	0	0	0	0	0	0	0	0	0	0	0
Soltu.DM.07G014750.1	59	42	0	0	10	20	15	41	43	14	125	0	16	130	16	88	12	32	18	120	0	37	20	54	0	29	17	183	11	42
Soltu.DM.07G014750.2	79	0	28	27	36	20	0	0	171	0	69	47	23	127	29	89	0	26	0	204	0	0	0	188	8	0	0	48	0	0
Soltu.DM.10G007420.1	0	0	0	0	0	0	0	0	0	0	0	0	0	0	0	0	0	0	0	0	0	0	0	0	0	0	0	0	0	0
Soltu.DM.06G027070.1	2267	1808	1183	1383	1599	1274	1527	2223	897	1253	1993	1536	1099	1629	1610	1530	1276	1828	2286	1219	1013	1720	1718	1229	1157	1523	1392	1739	1381	1513
Soltu.DM.01G029830.1	0	0	37	47	54	40	39	88	37	0	0	0	40	45	56	0	40	51	93	0	39	0	58	41	0	29	53	42	0	29
Soltu.DM.03G006420.1	3	0	2	3	0	7	0	11	6	6	4	8	7	6	0	0	3	0	3	0	0	0	0	0	0	0	0	0	0	0
Soltu.DM.06G022530.1	246	82	144	65	83	153	85	279	75	183	114	137	103	127	260	99	142	92	241	113	72	81	166	91	115	62	172	137	179	70
Soltu.DM.10G010950.1	0	0	0	0	0	0	0	0	0	0	0	0	0	0	0	0	0	0	0	0	0	0	0	0	0	0	0	0	0	0
Soltu.DM.01G015410.1	0	0	0	0	0	0	0	0	0	0	0	0	0	0	0	0	0	0	0	0	0	0	0	0	0	0	0	0	0	0
Soltu.DM.10G007430.1	15	33	11	22	36	0	8	36	0	24	49	17	8	28	19	20	9	32	17	23	0	15	13	20	12	6	20	28	11	31
Soltu.DM.10G025230.1	1844	1172	888	1481	1277	893	1237	1667	932	1175	1443	1347	514	1333	1456	903	807	1497	1824	746	1327	1051	965	1076	1450	1558	1047	1263	1114	819
Soltu.DM.05G021440.5	0	0	0	0	0	0	0	53	0	0	0	13	0	0	0	0	5	0	0	0	10	0	0	0	0	0	0	0	67	0
Soltu.DM.05G021440.4	0	0	0	0	0	0	0	0	0	0	0	0	4	0	0	0	0	0	0	0	1	0	0	0	0	0	0	0	0	0
Soltu.DM.05G021440.3	25	0	4	0	0	0	0	4	0	13	0	5	71	0	29	0	83	0	0	0	0	0	27	0	0	0	0	0	2	0
Soltu.DM.05G021440.2	0	0	0	0	0	0	0	0	0	0	0	0	0	0	0	0	0	0	75	0	35	0	0	0	72	0	131	0	0	0
Soltu.DM.05G021440.1	0	0	0	0	0	28	0	0	0	0	0	0	0	0	0	0	0	0	0	0	0	0	0	0	0	0	0	0	0	0
Soltu.DM.01G005910.2	11127	1419	5247	1593	1939	6068	1813	9785	843	7018	2417	8002	4845	1893	7159	1743	3677	2463	5603	1191	2298	1875	3992	1412	3458	1658	5995	2397	4493	1635
Soltu.DM.01G005910.1	170	9	10	17	67	80	94	155	8	260	0	207	166	5	16	35	8	74	174	65	34	70	147	72	153	55	282	86	200	18
Soltu.DM.11G015780.1	4744	2501	2081	1731	1875	2514	1575	4318	543	2297	1858	2808	2138	1596	2722	1331	2362	2120	3664	1022	1649	1712	2461	1091	2375	1705	2312	1534	2890	1365
Soltu.DM.05G020740.3	0	0	0	0	0	0	0	0	0	0	0	0	0	0	0	0	0	0	0	0	0	0	0	0	0	0	0	0	0	0
Soltu.DM.05G020740.2	17	12	0	13	0	11	9	16	29	0	13	0	0	0	7	25	3	3	9	0	0	19	0	6	13	0	8	0	17	6
Soltu.DM.05G020740.1	0	0	0	0	16	3	0	0	0	0	0	0	0	0	5	0	28	14	0	0	0	0	0	0	0	0	0	0	10	0
Soltu.DM.01G046880.1	138	107	140	83	128	103	117	230	24	150	154	158	88	117	151	102	83	93	192	101	60	77	170	106	68	83	184	155	100	85
Soltu.DM.01G046880.2	86	44	50	44	57	43	29	109	8	71	74	48	41	69	75	45	38	45	123	44	20	28	73	46	36	32	80	58	36	34
Soltu.DM.11G008180.1	514	22	204	12	24	206	16	495	31	101	44	154	151	75	320	32	231	42	280	26	121	36	75	25	140	20	229	49	243	14
Soltu.DM.02G021440.4	196	48	8	5	20	10	7	188	4	6	33	12	9	19	96	47	188	71	28	72	87	115	16	6	14	57	6	10	18	14
Soltu.DM.04G001480.1	545	157	266	157	219	395	231	570	355	226	276	374	208	187	345	215	337	317	569	146	321	237	261	142	289	118	396	213	421	177
Soltu.DM.02G021440.2	102	28	15	0	17	6	28	57	0	7	7	5	0	23	34	32	34	29	0	13	27	17	0	0	0	20	0	19	21	4
Soltu.DM.01G004060.1	37	0	12	0	1	13	0	23	3	13	1	11	12	0	14	2	14	0	15	0	10	0	14	3	10	1	22	0	17	0
Soltu.DM.02G021440.1	1321	682	804	546	798	881	639	1133	46	999	690	1106	566	703	1027	508	681	672	1270	494	679	610	781	542	774	516	909	719	1213	669
Soltu.DM.04G028090.1	189	0	45	0	0	92	0	126	0	41	7	189	24	0	7	0	0	0	71	8	8	0	12	7	24	0	46	0	45	0
Soltu.DM.10G030340.1	35	6	9	20	17	7	13	28	26	37	21	43	16	36	23	34	5	16	27	24	6	15	9	18	5	11	9	27	15	5
Soltu.DM.05G006050.1	6	12	6	0	11	6	11	12	0	8	9	0	5	9	18	8	8	7	19	7	9	4	11	5	12	9	21	7	11	5
Soltu.DM.07G009180.1	0	0	0	0	0	0	0	0	0	0	0	0	0	0	0	0	0	0	0	0	0	0	0	0	0	0	0	0	0	0
Soltu.DM.01G013740.1	0	0	0	0	0	0	0	0	0	0	0	0	0	0	0	0	0	0	0	0	0	0	0	0	0	0	0	0	0	0
Soltu.DM.04G003340.2	499	304	163	164	177	146	184	589	392	160	456	319	213	447	380	451	246	225	511	313	275	208	156	205	165	198	349	208	221	149
Soltu.DM.04G003340.1	27	113	0	74	37	89	33	47	68	43	191	130	51	184	43	120	66	46	42	30	37	39	70	0	35	0	26	32	84	98
Soltu.DM.10G028300.1	0	258	52	257	0	0	180	387	0	365	57	242	84	0	228	0	49	266	143	0	54	184	215	0	34	199	275	0	0	229
Soltu.DM.12G007970.1	7	12	0	46	8	5	14	10	37	0	0	0	0	0	0	0	16	24	19	0	7	7	0	9	7	11	10	84	4	31
Soltu.DM.10G028300.3	0	58	0	15	0	42	0	37	0	178	0	0	0	0	0	0	0	0	0	0	1	58	0	0	0	0	0	58	0	0
Soltu.DM.10G028300.2	93	16	0	6	71	0	0	18	53	13	2	6	1	36	5	9	4	12	2	22	2	0	5	15	5	4	2	2	49	5
Soltu.DM.01G012440.1	16	8	13	11	21	8	20	15	7	14	17	14	12	8	10	10	20	10	19	11	10	9	30	0	5	8	11	13	18	12
Soltu.DM.12G022650.1	82	34	16	23	25	44	51	23	415	7	90	38	56	229	24	137	42	59	20	87	27	48	12	66	31	26	16	117	46	41
Soltu.DM.08G029290.1	399	542	189	448	472	176	461	562	741	348	522	203	84	474	427	442	195	906	395	474	201	724	220	512	243	464	280	516	279	471
Soltu.DM.08G029290.3	0	0	22	0	0	0	0	0	0	0	0	0	0	0	0	0	0	0	0	0	0	0	0	0	0	0	0	0	0	0
Soltu.DM.08G029290.2	0	0	0	0	0	0	0	2	0	0	0	0	0	0	0	0	0	3	5	0	0	0	0	1	0	0	0	0	0	0
Soltu.DM.03G017770.1	0	0	0	0	0	0	0	0	3	0	0	0	0	0	0	0	0	0	0	0	0	0	0	0	0	0	0	0	0	0
Soltu.DM.08G009160.1	0	0	0	0	0	0	0	0	0	0	0	0	0	0	0	0	0	0	0	0	0	0	0	0	0	0	0	0	0	0
Soltu.DM.07G021900.1	483	89	275	67	80	192	91	525	141	329	139	387	149	150	380	135	221	119	484	129	134	103	249	163	203	115	409	174	247	100
Soltu.DM.09G028670.1	26	23	0	0	0	0	5	0	4	0	0	0	0	0	0	0	0	0	0	0	0	0	0	0	0	0	0	0	0	0
Soltu.DM.02G017940.1	183	108	135	96	176	131	105	169	122	95	175	89	62	137	157	134	133	132	203	105	87	87	102	98	99	112	207	148	131	114
Soltu.DM.03G028490.1	425	374	231	437	475	269	413	283	243	248	452	189	199	254	269	440	268	370	253	235	307	312	157	238	200	229	230	455	264	360
Soltu.DM.01G049950.1	576	82	283	376	219	559	215	307	154	111	233	196	198	353	155	744	381	542	172	206	269	259	74	111	351	48	79	394	328	149
Soltu.DM.03G028490.2	229	205	92	115	159	0	142	151	0	0	0	31	0	154	0	0	62	180	62	5	0	185	10	60	106	120	0	0	170	0
Soltu.DM.01G030840.1	1511	1098	745	693	769	1167	618	1446	173	687	539	919	1012	617	857	360	807	618	1009	393	659	581	892	322	977	698	703	505	1115	442
Soltu.DM.06G032810.2	0	0	0	0	0	0	0	0	0	0	0	0	0	0	0	0	0	0	0	0	0	0	0	0	0	0	0	0	0	0
Soltu.DM.09G000640.1	0	0	0	0	0	0	0	0	0	0	0	0	0	0	0	0	0	0	0	0	0	0	0	0	0	0	0	0	0	0
Soltu.DM.02G007410.1	346	63	131	26	29	167	19	294	21	110	62	278	180	61	100	44	120	32	189	18	136	44	94	35	139	51	176	65	214	39
Soltu.DM.10G017970.1	2702	29	1081	181	169	2646	79	1466	11	618	17	2880	565	9	1428	58	1187	459	2032	45	861	204	478	19	1476	36	1353	112	1540	78
Soltu.DM.07G020350.1	18	18	13	13	10	7	15	18	2	7	11	16	18	4	19	3	10	7	16	10	8	9	16	5	10	6	17	14	13	11
Soltu.DM.05G024490.1	186	22	72	69	44	251	32	99	29	50	14	85	70	10	50	41	82	48	49	13	82	41	26	16	143	12	38	30	202	41
Soltu.DM.02G015850.1	175	178	70	55	135	79	99	66	97	27	76	65	28	118	87	108	31	256	112	113	43	260	26	91	43	164	44	127	61	130
Soltu.DM.12G030130.1	5	12	0	0	6	0	0	0	0	0	0	0	3	0	0	0	0	7	0	0	0	13	0	0	4	10	0	0	0	0
Soltu.DM.02G032870.2	0	0	7	8	5	7	3	0	5	0	16	9	0	7	18	0	6	4	7	7	0	6	5	4	5	4	0	0	0	0
Soltu.DM.02G032870.1	1439	962	831	841	1017	875	903	1633	1140	1227	1161	1272	952	1000	1266	864	796	922	1654	768	634	753	1395	772	741	767	1527	1082	1032	725
Soltu.DM.08G024030.1	199	114	104	60	97	137	49	207	63	100	84	106	85	79	125	51	86	50	179	51	61	66	110	64	101	56	133	68	112	65
Soltu.DM.01G019500.1	65	123	0	0	0	0	0	168	0	137	0	0	82	0	0	0	0	248	0	142	0	0	0	0	0	0	0	247	0	0
Soltu.DM.01G019500.2	4442	2073	2120	1820	2016	2511	1834	2999	873	1265	2120	2056	1950	1988	1972	1459	2249	1559	2734	1206	2085	1811	1763	1468	2663	1984	2392	2013	3284	1682
Soltu.DM.06G033910.1	1476	703	673	572	675	898	618	1072	507	502	670	785	507	640	1043	673	769	784	1654	558	780	511	1041	519	876	525	1309	722	1171	517
Soltu.DM.10G003090.1	179	92	67	43	94	121	52	122	14	50	34	68	56	43	112	32	106	65	160	40	90	45	93	32	72	48	113	48	109	34
Soltu.DM.01G000160.1	1397	508	634	481	433	664	543	1248	793	530	920	910	581	809	527	754	449	596	834	621	398	576	603	678	542	561	712	897	768	440
Soltu.DM.03G005510.2	2006	1000	994	554	721	568	326	446	153	1250	290	827	310	234	237	299	516	492	754	137	389	340	899	282	386	599	432	309	850	474
Soltu.DM.03G022550.1	1786	141	608	243	104	908	139	1552	390	475	346	887	729	608	937	818	856	374	996	301	798	340	498	207	966	130	735	385	1349	172
Soltu.DM.12G024150.1	0	0	6	5	11	8	8	0	0	3	0	0	0	6	7	0	0	0	11	0	0	3	0	0	7	0	0	0	0	0
Soltu.DM.02G008400.1	3	0	0	0	0	0	0	8	0	0	0	7	0	0	0	3	4	0	0	0	0	0	0	0	0	0	9	0	0	0
Soltu.DM.08G023010.1	21	9	6	6	9	6	6	21	6	2	19	9	6	25	9	10	13	17	28	23	12	12	18	8	4	17	14	11	11	7
Soltu.DM.07G000190.1	11	1	7	1	1	3	4	15	3	35	4	10	6	7	8	2	7	5	19	3	3	2	13	3	4	0	13	6	4	1
Soltu.DM.04G013470.1	0	0	0	0	0	0	0	0	0	0	0	0	0	0	0	0	0	0	0	0	0	0	0	0	0	0	0	0	0	0
Soltu.DM.04G027150.1	0	5	3	11	0	0	0	11	25	0	24	0	0	15	0	44	0	16	0	8	11	10	0	0	0	0	0	6	0	6
Soltu.DM.01G006230.1	0	0	0	0	0	0	0	0	2	0	0	0	0	0	0	0	0	0	0	0	0	0	0	0	0	0	0	0	0	0
Soltu.DM.09G017820.1	0	0	0	0	0	0	0	0	0	0	0	0	0	0	0	4	0	5	0	0	0	0	0	0	0	0	0	0	0	0
Soltu.DM.09G022890.1	0	0	2	0	0	0	0	0	0	0	0	0	0	0	0	0	0	0	0	0	0	0	0	0	0	0	0	0	0	0
Soltu.DM.01G020710.1	0	0	0	0	0	0	0	0	0	0	0	0	0	0	0	0	0	0	0	0	0	0	0	0	0	0	0	0	0	0
Soltu.DM.06G020940.1	0	0	0	0	0	0	0	0	0	0	0	0	0	0	0	0	0	0	0	0	0	0	0	0	0	0	0	0	0	0
Soltu.DM.11G017780.1	8	19	0	13	15	0	19	0	10	4	32	0	0	25	0	16	0	14	0	0	0	16	0	0	0	17	0	0	0	15
Soltu.DM.04G003580.1	2	21	2	17	12	3	11	5	5	3	26	7	2	18	5	11	1	4	7	15	3	9	5	13	0	8	6	17	2	19
Soltu.DM.04G002880.1	115	0	25	0	0	58	0	247	0	53	0	307	69	0	37	0	27	0	22	3	67	0	50	0	61	0	32	0	75	0
Soltu.DM.06G016600.1	0	6	0	0	5	0	4	6	11	0	14	0	0	0	0	0	0	0	4	0	0	0	0	0	0	0	0	6	0	5
Soltu.DM.09G015490.1	0	0	0	0	0	0	0	0	0	0	0	0	0	0	0	0	0	0	0	0	0	0	0	0	0	0	0	0	0	0
Soltu.DM.12G022880.1	0	0	0	0	0	0	0	0	0	0	0	0	0	0	0	0	0	0	0	0	0	0	0	0	0	0	0	0	0	0
Soltu.DM.11G008610.2	335	124	150	133	146	165	140	317	143	166	174	237	169	121	144	151	147	167	211	73	112	147	166	0	198	109	177	176	221	107
Soltu.DM.11G008610.3	0	0	0	0	0	0	0	0	0	0	0	0	0	0	23	0	0	0	0	0	0	0	0	0	0	0	0	0	0	0
Soltu.DM.11G008610.1	3	0	7	0	3	22	4	19	0	17	0	5	0	0	5	5	0	3	3	0	4	0	0	86	0	0	2	0	4	6
Soltu.DM.08G026600.1	0	1	2	67	4	2	18	5	58	0	13	0	0	6	0	41	1	22	2	21	0	16	0	5	0	3	3	30	3	21
Soltu.DM.09G022330.1	13943	4214	7891	2995	2752	8601	2914	11203	3939	4408	4014	7839	8623	4359	5734	1967	5333	2973	6677	2239	4605	2586	5570	2586	6912	3801	7415	3224	7643	2523
Soltu.DM.08G004350.1	2263	411	1131	424	361	1158	436	1719	869	547	586	987	779	831	1055	647	949	423	1135	463	869	420	580	339	845	276	819	570	1193	285
Soltu.DM.04G019980.1	0	0	0	0	0	0	0	0	0	0	0	4	0	0	0	0	0	6	0	0	0	7	0	0	0	0	0	0	0	0
Soltu.DM.06G010110.1	325	236	261	216	202	269	211	362	276	59	193	152	122	289	300	223	229	191	245	161	161	206	103	146	222	124	196	276	370	171
Soltu.DM.11G004380.1	2626	2497	1133	1704	2052	1366	1797	1990	339	1266	2206	1389	990	2051	1354	1809	1125	2119	1910	1413	1017	1994	1310	1551	1291	1805	1165	2039	1682	1758
Soltu.DM.06G031870.1	26	88	36	71	107	13	75	26	60	30	80	36	10	76	49	41	174	134	40	43	120	135	37	48	95	64	43	62	242	72
Soltu.DM.08G022970.1	1353	905	663	712	901	539	770	1056	612	772	848	653	517	980	757	1016	431	1064	910	755	294	956	623	678	410	630	581	983	509	636
Soltu.DM.S001130.1	0	0	0	0	0	0	0	0	0	0	0	0	0	0	3	0	0	0	0	0	0	0	0	0	0	0	0	0	0	0
Soltu.DM.06G007040.1	0	0	0	0	0	0	0	0	2	0	0	0	0	0	0	0	0	0	0	0	0	0	0	0	0	0	0	0	0	0
Soltu.DM.12G023980.1	0	0	0	17	0	0	0	0	17	0	10	0	0	0	0	17	0	0	0	6	0	0	0	0	0	0	0	13	0	0
Soltu.DM.01G033180.1	2182	868	1086	524	885	1609	766	1618	816	1063	473	1150	1021	410	1614	492	1056	642	1747	333	1020	366	1436	316	1017	538	1478	446	1315	369
Soltu.DM.09G020360.1	34	3	16	0	4	18	0	59	8	12	4	24	18	0	34	0	25	7	62	0	45	3	28	0	19	0	45	3	39	0
Soltu.DM.01G033180.2	124	4	0	47	7	81	0	180	158	5	0	40	3	35	0	13	4	0	98	0	2	60	46	34	0	0	104	3	48	0
Soltu.DM.09G022330.2	1175	199	133	82	318	402	136	1104	1091	220	292	208	325	277	286	315	321	184	1155	255	427	263	340	93	244	132	307	252	404	197
Soltu.DM.08G003890.1	34	33	0	20	22	17	24	37	14	27	37	29	7	23	28	16	21	36	52	21	19	36	13	18	24	14	25	23	35	23
Soltu.DM.05G026620.1	1895	1144	856	843	784	776	750	2189	1388	784	1265	974	577	1386	1137	1076	657	1351	1494	1256	548	1159	612	972	524	925	1004	1304	743	928
Soltu.DM.11G011160.1	22	0	11	8	6	16	5	16	11	7	0	9	0	6	0	6	11	8	12	0	13	6	9	4	12	0	16	0	13	5
Soltu.DM.04G021630.1	31864	27701	22273	16730	31538	17531	25448	19634	22084	13381	12422	14943	10310	12101	15411	8671	8196	22814	17875	8419	7824	21389	13336	10016	9053	23392	17474	13771	14496	21433
Soltu.DM.08G025820.1	295	71	166	41	37	117	46	439	65	180	157	302	135	100	244	154	122	77	325	137	92	73	215	188	87	60	316	182	77	52
Soltu.DM.12G027740.1	6369	2600	2921	2192	3026	4226	2517	4609	4909	3287	2004	3869	2695	1942	4630	2040	3226	2763	5339	1352	2279	2048	3392	1365	3791	1879	4691	2378	4442	1749
Soltu.DM.05G024650.1	2801	1579	1196	1462	1280	1516	1224	2395	1121	1088	2082	1746	1220	2054	1688	2304	1268	1967	2437	1341	1337	1637	1097	1251	1513	1266	1387	1815	2081	1207
Soltu.DM.10G005570.1	263	22	111	21	25	95	250	151	0	43	98	87	190	212	35	93	54	0	91	99	65	26	92	64	62	15	231	147	86	0
Soltu.DM.05G024650.2	0	0	0	18	0	0	0	0	0	0	0	0	0	0	0	0	0	0	0	0	0	0	0	4	9	0	0	0	0	0
Soltu.DM.04G019420.1	9311	3163	5174	2104	2532	3831	2227	6909	1633	3513	4706	4902	3072	4482	4338	2485	3057	2937	7589	2839	2935	2738	4714	2852	3169	2745	5977	3978	4223	2554
Soltu.DM.04G019420.3	107	18	35	8	17	28	7	15	0	16	21	20	10	15	19	8	10	54	78	15	4	45	107	22	10	59	7	23	8	13
Soltu.DM.04G019420.2	9	0	0	0	0	0	0	0	0	0	0	0	0	0	7	0	0	0	0	0	0	0	58	41	0	90	0	0	0	0
Soltu.DM.04G019420.5	790	291	635	155	125	305	40	500	79	174	206	212	356	239	311	158	279	49	185	216	41	110	261	76	102	142	188	478	94	62
Soltu.DM.04G019420.4	701	110	306	164	97	446	91	262	97	89	76	233	137	251	177	118	73	217	280	221	83	69	266	195	230	134	122	99	76	157
Soltu.DM.02G013720.1	6	3	5	0	0	4	0	3	3	4	2	0	3	2	2	0	9	0	2	0	0	0	3	0	0	0	0	4	5	0
Soltu.DM.03G023420.1	0	0	0	0	0	0	0	0	0	0	3	0	0	0	2	0	0	0	0	0	0	0	0	0	0	0	0	0	0	0
Soltu.DM.06G014270.1	717	337	300	317	373	447	380	464	343	301	285	299	201	290	366	440	338	477	349	224	264	368	278	249	344	258	372	390	419	254
Soltu.DM.01G034120.1	116	88	63	78	102	51	96	48	57	41	74	37	25	73	93	72	71	80	96	46	53	77	51	47	68	59	119	103	81	65
Soltu.DM.09G007390.1	2107	9	1242	6	0	732	13	2400	59	1777	164	1429	662	153	952	110	408	26	1760	137	199	21	1283	119	181	15	1374	248	317	8
Soltu.DM.04G024740.1	0	0	0	0	0	0	0	0	0	0	0	0	0	0	0	0	0	0	0	0	0	0	0	0	0	0	0	0	0	0
Soltu.DM.04G002320.1	0	0	3	0	0	0	0	0	0	0	0	0	0	0	0	0	0	0	0	0	0	0	0	0	0	0	0	0	0	0
Soltu.DM.11G000100.2	1415	1172	485	162	672	285	626	1042	0	960	720	158	360	1139	768	643	864	550	1491	804	958	1385	953	222	612	819	635	420	714	646
Soltu.DM.11G000100.1	5552	4575	2548	3696	4173	3153	3261	6163	1057	2929	4435	4340	2491	3457	4759	3503	2956	5005	7721	3047	2750	4044	4305	3668	3020	3711	3729	4491	4088	3165
Soltu.DM.03G027820.1	1925	871	1201	734	804	952	79	2553	502	1235	585	1950	1172	764	621	557	1127	630	2085	526	844	906	404	120	367	238	495	160	340	542
Soltu.DM.10G013070.1	40	3	11	0	3	39	7	11	9	19	4	9	12	20	9	14	17	4	19	5	6	11	11	6	22	0	12	20	31	0
Soltu.DM.03G027820.2	147	0	0	0	0	359	621	0	181	125	560	0	0	0	632	0	0	528	0	199	0	0	944	653	645	650	1231	794	980	155
Soltu.DM.03G035900.1	501	0	145	8	10	463	0	414	101	95	26	205	260	64	223	59	274	31	236	13	169	20	115	22	379	0	164	19	266	4
Soltu.DM.11G005520.1	273	116	110	85	107	124	87	175	58	161	106	133	88	92	89	74	68	107	59	56	43	153	55	60	58	119	69	106	79	96
Soltu.DM.11G021530.4	0	0	0	0	0	0	0	0	0	0	0	0	0	0	0	0	0	0	41	0	0	0	0	0	0	0	0	0	0	0
Soltu.DM.11G021530.5	0	0	0	0	0	46	0	0	0	0	0	0	32	0	0	0	0	0	0	0	0	0	0	0	0	0	0	0	0	0
Soltu.DM.04G010530.1	25	223	22	73	9	202	336	706	14	8	9	5	6	17	22	362	7	22	22	20	22	26	43	69	24	321	17	11	42	11
Soltu.DM.04G010530.2	0	135	0	58	0	0	0	0	0	0	0	0	0	0	0	0	0	0	0	0	0	0	214	0	0	73	0	0	87	0
Soltu.DM.04G010530.3	616	173	340	336	767	141	258	102	620	529	546	527	302	472	589	0	399	539	628	263	272	527	211	305	365	77	586	464	367	552
Soltu.DM.09G011180.1	0	0	0	0	0	0	0	0	0	0	0	0	0	0	0	0	0	0	0	0	0	0	0	0	0	0	0	0	0	0
Soltu.DM.01G008650.1	0	0	0	0	0	0	0	0	0	0	0	0	0	0	0	0	0	0	0	0	0	0	0	0	0	0	0	0	0	0
Soltu.DM.10G017040.1	44	92	13	239	34	12	158	42	1232	20	87	2	25	314	16	773	28	237	57	154	17	181	7	39	4	24	34	246	29	53
Soltu.DM.12G003170.1	0	0	0	0	0	0	0	0	0	0	0	0	0	3	0	1	0	0	0	0	0	0	0	0	0	0	1	0	1	0
Soltu.DM.11G005580.1	151	9	39	12	9	26	9	66	2	63	4	42	4	16	24	3	21	6	11	10	18	7	19	8	20	19	23	2	4	13
Soltu.DM.02G003100.1	0	0	0	0	0	0	0	0	0	0	0	0	0	0	0	0	0	0	0	0	0	0	0	0	0	0	0	0	0	0
Soltu.DM.05G015990.1	0	0	0	0	0	0	0	0	0	0	0	0	0	0	0	0	0	0	0	0	0	0	0	0	0	0	0	0	0	0
Soltu.DM.10G028020.1	0	0	0	0	0	0	0	0	4	0	0	0	0	0	0	0	0	0	0	0	0	0	0	0	0	0	0	0	0	0
Soltu.DM.12G027030.1	0	20	10	0	28	0	0	0	10	17	0	0	0	0	0	0	0	0	0	0	0	0	0	0	0	0	24	0	13	0
Soltu.DM.05G012170.1	15	0	0	0	0	0	0	37	6	0	6	0	21	0	14	0	24	3	73	0	24	8	26	0	42	0	52	0	57	0
Soltu.DM.01G008640.1	0	0	0	0	0	0	0	0	0	0	0	0	0	0	0	0	0	0	0	0	0	0	0	0	0	0	0	0	0	0
Soltu.DM.02G029060.1	0	0	0	0	6	0	0	3	0	0	6	0	0	0	0	7	0	5	0	0	4	4	4	5	0	0	3	4	0	0
Soltu.DM.04G029010.1	235	166	61	296	162	67	225	172	115	79	153	90	42	159	110	298	81	405	132	94	61	310	43	78	77	126	46	214	120	146
Soltu.DM.03G016430.1	1216	633	631	844	763	521	761	1391	568	1033	1022	784	380	905	987	1057	832	790	795	579	584	821	594	598	686	511	729	1181	854	551
Soltu.DM.01G027620.1	43	0	49	9	11	37	51	9	0	0	0	0	10	0	24	0	0	30	169	10	19	0	120	0	11	0	78	14	37	13
Soltu.DM.01G027620.3	3	2	11	0	2	5	0	11	0	2	1	15	3	0	4	6	6	2	4	0	1	5	6	0	9	0	6	0	5	0
Soltu.DM.01G027620.2	102	76	85	55	37	188	0	328	29	229	0	170	182	29	237	48	159	59	554	15	128	64	391	6	169	28	433	8	211	0
Soltu.DM.02G012870.1	605	281	205	248	285	430	245	521	261	267	229	302	212	205	409	251	280	364	492	202	223	204	282	194	227	159	533	270	372	153
Soltu.DM.01G027620.4	56	0	0	0	0	0	3	0	0	0	11	0	0	0	0	0	38	0	62	0	0	0	0	7	0	0	2	2	0	0
Soltu.DM.05G000650.1	9	0	1	0	1	5	0	4	3	4	3	5	5	2	6	0	6	1	4	3	5	0	2	5	4	2	5	0	0	3
Soltu.DM.10G026130.1	118	71	18	0	0	56	0	152	114	0	0	0	46	70	47	0	97	77	52	0	100	0	0	0	16	34	0	23	43	9
Soltu.DM.09G004890.1	0	0	0	0	0	0	0	0	0	0	0	0	0	0	0	0	0	0	0	0	0	0	0	0	0	0	0	0	0	0
Soltu.DM.10G027070.1	127	56	14	0	6	11	5	15	6	13	0	14	5	0	11	6	11	0	11	0	11	0	13	0	9	0	0	5	18	0
Soltu.DM.04G028490.4	0	43	0	23	0	0	0	90	0	35	0	67	40	22	0	0	0	0	0	0	0	0	33	0	0	23	0	0	0	0
Soltu.DM.04G029000.1	0	0	3	15	20	0	5	0	0	0	7	0	0	14	0	9	0	9	0	6	0	9	0	9	0	0	0	8	0	5
Soltu.DM.01G044040.1	0	0	0	0	0	0	0	0	0	0	0	0	0	0	0	0	0	0	0	0	0	0	0	0	0	0	0	0	0	0
Soltu.DM.04G028490.1	1417	623	734	482	597	810	503	1027	938	579	849	780	417	791	708	651	662	688	918	549	501	592	573	507	665	507	787	816	740	577
Soltu.DM.04G028490.2	74	0	0	26	0	29	76	99	75	0	0	27	0	63	0	50	0	0	0	0	0	0	0	0	0	0	30	0	81	0
Soltu.DM.04G028490.3	62	35	26	7	11	16	26	67	64	19	23	10	9	34	16	47	17	33	35	20	29	34	14	23	7	22	12	13	9	6
Soltu.DM.07G000250.1	324	91	129	161	188	144	199	282	305	176	119	151	86	99	131	182	100	220	162	132	84	191	77	73	75	110	128	145	125	129
Soltu.DM.07G023220.1	7	3	0	32	0	0	0	0	14	0	0	0	0	8	0	62	6	43	0	10	0	10	0	0	0	0	6	19	0	9
Soltu.DM.10G030180.1	29933	16681	16142	9963	9337	24197	9862	24300	5566	6442	9589	16837	26535	9777	13849	3134	18620	11206	14376	4025	15971	9849	9324	4387	24122	14334	17573	5502	31906	9964
Soltu.DM.10G002590.1	0	0	0	0	0	0	0	0	0	0	0	0	0	0	0	0	0	0	0	0	0	0	0	0	0	0	0	0	0	0
Soltu.DM.04G037700.1	770	653	191	508	597	149	781	297	230	108	611	200	199	731	159	787	84	1148	147	704	70	964	137	679	77	444	233	939	0	482
Soltu.DM.04G037700.2	0	0	0	0	0	0	0	0	0	0	0	0	0	0	0	0	0	0	0	0	0	0	0	0	0	0	0	0	64	0
Soltu.DM.03G012140.1	0	0	0	0	0	0	0	0	1	0	0	0	0	0	0	0	0	0	0	0	0	0	0	0	0	0	0	0	0	0
Soltu.DM.02G029920.1	899	299	467	293	381	542	296	781	163	501	230	401	434	219	536	177	455	323	528	157	392	258	343	140	518	267	423	238	654	252
Soltu.DM.12G024600.1	11	7	6	10	4	23	4	8	0	32	3	29	14	0	0	0	13	2	1	0	8	0	0	0	4	0	0	0	10	1
Soltu.DM.05G025510.1	2445	1137	1182	870	1031	1806	900	1915	343	1123	927	1337	979	730	1585	722	1225	1131	1649	577	961	715	1289	512	1159	878	1581	878	1543	635
Soltu.DM.01G019620.1	0	0	0	0	0	0	0	0	0	0	0	0	0	0	0	0	0	0	0	0	0	0	0	0	0	0	0	0	0	0
Soltu.DM.06G029100.1	10382	2872	6089	2897	3281	7499	2907	16180	3968	7553	5282	10463	7048	4515	11521	4102	7747	3796	18163	3701	7476	3531	10938	3955	7737	3298	12732	5377	12077	3326
Soltu.DM.01G028910.1	106	25	36	34	32	47	12	95	37	65	41	63	43	26	95	34	55	46	175	12	44	26	78	22	51	29	128	49	63	10
Soltu.DM.06G000730.1	9541	6379	5690	4341	5164	4982	4979	8760	2600	4849	9811	5713	3559	8054	7468	5665	5943	7074	9660	5768	4558	5967	6293	5803	5030	5640	8124	7980	7720	6065
Soltu.DM.04G009060.1	0	0	0	0	0	0	0	0	0	0	0	0	0	0	0	0	0	0	0	0	0	0	0	0	0	0	0	0	0	0
Soltu.DM.09G025800.4	0	20	0	0	0	0	0	241	0	0	0	0	0	0	0	0	0	230	0	0	0	0	0	0	0	0	0	0	0	0
Soltu.DM.01G032640.1	30	9	23	6	7	24	3	30	5	11	5	19	9	10	15	9	10	22	45	15	26	10	15	0	9	11	15	10	19	3
Soltu.DM.07G028150.1	14	0	2	23	15	11	9	27	1	1	9	0	10	0	0	0	1	1	0	0	0	14	4	0	10	1	3	0	2	19
Soltu.DM.07G028150.2	0	0	0	0	0	0	0	0	0	0	0	0	0	0	0	0	0	0	0	0	0	0	0	0	0	0	0	0	0	0
Soltu.DM.07G028150.3	677	422	294	306	396	448	327	666	439	390	375	569	361	297	473	264	359	371	584	192	295	257	385	271	419	322	581	356	509	298
Soltu.DM.08G009590.1	0	0	0	0	0	0	0	0	0	0	0	0	0	0	0	0	0	0	0	0	0	0	0	0	0	0	0	0	0	0
Soltu.DM.12G022490.1	22	21	0	16	26	10	11	27	10	0	16	11	10	16	25	12	14	14	36	14	7	12	30	0	14	7	14	15	9	0
Soltu.DM.11G018840.1	1253	592	668	539	592	834	602	1099	1164	693	627	762	408	535	648	773	431	891	774	398	363	674	463	413	536	510	680	637	693	592
Soltu.DM.02G026610.1	75	134	41	170	224	73	180	153	124	21	241	50	71	128	310	207	122	274	483	132	211	162	310	149	165	245	399	160	216	142
Soltu.DM.05G018930.1	17	15	20	16	8	14	0	29	5	9	12	11	9	12	19	11	9	19	14	11	8	15	14	8	12	12	16	0	19	8
Soltu.DM.03G015960.1	2788	999	2041	885	633	2616	695	3595	343	1831	517	2706	2206	608	1754	247	1958	916	1581	294	1441	714	1025	291	2501	1139	1478	448	2855	649
Soltu.DM.12G008830.1	0	3	0	0	0	0	0	0	0	0	6	0	0	7	0	0	0	0	0	7	0	0	0	0	0	0	0	8	0	0
Soltu.DM.02G031590.1	134	140	79	98	130	71	102	168	86	120	147	100	55	123	100	99	77	118	166	107	66	116	121	105	101	70	98	150	80	61
Soltu.DM.11G003560.1	9810	4516	5375	4237	3938	4155	3739	14151	574	7214	5894	9206	6611	5464	8167	3464	6048	4851	10794	2741	4576	4399	7812	3057	5811	3549	8284	3938	7641	2994
Soltu.DM.03G002100.1	1018	446	459	302	423	592	373	876	177	518	437	536	359	382	584	378	448	461	716	271	395	506	543	252	539	369	567	349	596	350
Soltu.DM.12G029960.1	240	0	68	0	7	121	3	253	20	63	26	65	101	27	104	27	104	0	288	15	63	0	140	14	128	4	235	40	190	0
Soltu.DM.09G015340.1	0	0	0	0	0	0	0	0	0	0	0	0	0	0	0	0	0	0	0	0	0	0	0	0	0	0	0	0	0	0
Soltu.DM.03G037390.1	455	205	196	101	138	152	167	446	131	292	142	234	141	147	315	157	218	188	275	122	164	177	193	77	136	104	208	157	204	88
Soltu.DM.08G007100.1	0	0	0	0	0	0	0	0	0	0	0	0	0	0	0	3	0	0	0	0	0	0	0	0	0	0	0	0	0	0
Soltu.DM.11G013230.1	1128	642	428	679	709	901	576	857	148	357	503	531	431	484	847	646	807	778	1065	404	682	620	607	372	782	407	598	619	957	366
Soltu.DM.03G002110.1	559	5	289	13	0	129	0	687	24	938	260	1104	341	276	142	34	39	0	635	57	0	0	669	46	34	7	414	83	29	0
Soltu.DM.01G035700.1	970	769	674	656	923	683	755	1170	502	759	627	678	507	553	874	539	584	841	826	496	405	806	605	495	600	733	807	651	801	568
Soltu.DM.01G035700.3	3	4	0	1	0	2	1	0	0	0	0	0	0	0	0	1	0	7	0	2	0	0	3	1	1	2	2	4	0	4
Soltu.DM.01G035700.2	0	0	0	0	0	0	0	0	0	0	0	0	0	0	0	0	0	0	0	0	0	0	0	0	0	0	0	0	0	0
Soltu.DM.10G004650.1	0	0	0	0	0	0	0	0	2	0	0	0	0	0	0	0	1	2	0	0	0	0	0	0	0	1	0	0	0	0
Soltu.DM.10G020080.1	8	2	3	0	6	9	3	8	0	4	0	5	5	5	2	0	0	0	0	0	3	0	0	0	0	0	0	5	0	0
Soltu.DM.06G016120.1	0	0	0	0	0	0	0	0	0	0	0	0	0	0	0	0	0	0	0	0	0	0	0	0	0	0	0	0	0	0
Soltu.DM.12G022800.1	774	229	897	90	201	1000	691	1136	87	1347	556	978	1038	1774	1197	278	569	230	2495	349	293	220	2207	238	374	132	4495	471	688	207
Soltu.DM.01G024760.1	6637	3251	3458	2870	3408	4121	2891	8569	4302	4314	3743	5691	3674	3347	5593	3925	3886	3858	5730	2877	2956	3419	3661	2831	4054	2880	5085	4276	4862	2808
Soltu.DM.02G034090.1	0	0	0	14	6	0	6	0	0	0	0	0	0	2	0	11	0	8	0	3	0	11	0	0	0	0	0	9	0	0
Soltu.DM.04G020250.1	0	0	0	0	0	0	0	0	0	0	0	0	0	0	0	0	0	0	0	0	0	0	0	0	0	0	0	0	0	0
Soltu.DM.02G013330.1	764	313	428	307	385	340	359	1031	167	414	368	505	356	320	589	271	317	373	627	244	349	271	407	214	361	270	640	318	553	275
Soltu.DM.02G013330.2	0	33	0	13	0	0	12	0	0	41	42	35	32	50	69	24	98	56	27	0	0	58	81	0	0	34	0	8	0	0
Soltu.DM.06G005370.2	805	449	385	465	510	392	431	787	194	434	517	548	306	517	482	379	280	541	774	349	365	617	665	365	437	461	414	534	515	446
Soltu.DM.06G021110.1	283	652	29	1485	1236	99	1315	39	3522	33	829	23	32	715	12	1766	55	1420	12	906	36	1031	21	601	31	575	24	1593	47	1033
Soltu.DM.03G022450.1	619	491	416	408	395	306	374	829	426	406	645	562	354	510	482	428	330	452	553	396	294	377	424	443	314	400	614	567	477	408
Soltu.DM.06G005370.1	0	3	0	0	0	0	0	0	0	0	0	0	0	15	0	0	0	0	8	20	0	0	0	0	0	0	0	0	0	22
Soltu.DM.03G010350.1	9	0	3	45	40	0	30	6	96	0	15	0	0	41	3	96	12	143	3	12	9	49	0	4	0	0	0	39	0	10
Soltu.DM.02G022270.1	107	59	66	67	100	49	77	149	118	107	66	85	52	60	87	43	50	89	145	28	32	55	105	56	56	66	156	76	50	47
Soltu.DM.07G005960.2	921	245	436	241	280	537	261	560	126	339	326	458	365	255	434	189	341	303	574	192	289	259	425	222	470	241	439	253	452	217
Soltu.DM.02G007640.1	11289	7520	6457	5132	7545	6836	6858	10849	1020	8057	5455	9127	5235	4979	8625	3958	5932	6015	9410	3632	3480	5509	7345	3953	5107	5669	9892	5134	7070	5549
Soltu.DM.09G013620.1	0	0	0	0	0	0	0	0	0	0	0	0	0	0	0	0	0	0	0	3	0	0	0	0	0	0	0	0	0	0
Soltu.DM.08G029000.2	0	0	0	0	0	0	0	0	0	0	0	0	0	0	0	0	0	0	0	0	0	0	0	0	0	0	0	0	0	0
Soltu.DM.07G011890.1	1864	1521	890	1218	1455	854	1289	1656	1946	1098	2086	1200	772	1941	993	1651	816	1454	1027	1465	593	1432	1094	1400	706	1217	1201	2147	792	1125
Soltu.DM.03G023820.1	550	448	295	434	435	333	384	504	494	314	466	320	168	378	413	417	414	625	562	247	280	468	356	246	351	357	397	423	393	374
Soltu.DM.07G007870.1	0	0	0	0	0	0	0	0	0	0	0	0	0	0	0	0	0	0	0	0	0	0	0	0	0	0	0	0	0	0
Soltu.DM.12G008300.1	3770	2548	1452	1689	2033	1697	1808	3271	1412	1547	2467	1735	1063	2424	2515	2062	1855	2513	3477	1775	1619	2497	2184	1826	1689	1949	2307	2238	2266	1649
Soltu.DM.04G031460.1	0	0	0	0	0	0	0	0	2	0	0	0	0	0	0	0	0	0	0	0	0	0	0	0	0	0	0	0	0	0
Soltu.DM.11G026430.1	0	0	0	0	0	0	0	0	0	0	0	0	0	0	0	0	0	0	0	0	0	0	0	0	0	0	0	0	0	0
Soltu.DM.01G015530.1	0	0	0	0	0	0	0	0	0	0	3	0	0	0	3	0	0	0	0	0	0	0	0	0	0	0	0	0	0	0
Soltu.DM.03G012530.1	4	0	0	0	0	0	0	0	0	0	0	0	0	0	0	0	0	0	0	0	0	0	0	0	0	0	0	0	0	0
Soltu.DM.11G009940.1	1409	939	799	823	1010	881	859	1824	384	1051	1028	1054	789	682	1352	804	810	1071	1564	644	599	878	1014	717	884	791	1136	949	1145	740
Soltu.DM.04G008410.2	128	147	49	49	96	57	60	109	52	91	117	41	75	96	49	96	33	81	111	45	29	100	53	92	77	139	110	87	77	61
Soltu.DM.04G008410.1	179	65	68	127	113	59	140	255	31	143	81	216	94	115	143	84	74	162	168	109	66	133	121	81	81	94	105	101	93	93
Soltu.DM.07G010990.1	0	0	0	0	0	0	0	0	1	0	0	0	0	0	0	0	0	0	0	0	0	0	0	0	0	0	0	0	0	0
Soltu.DM.12G028510.1	7	3	0	4	6	0	0	4	5	10	7	0	0	18	8	12	7	11	0	0	0	0	0	0	0	0	0	11	0	0
Soltu.DM.02G027380.3	446	199	148	127	172	238	219	361	165	244	176	216	128	177	316	130	282	230	308	143	189	169	188	116	186	127	269	171	212	130
Soltu.DM.02G027380.2	0	0	0	0	0	0	0	0	0	0	0	0	0	0	0	0	0	0	0	0	0	0	0	0	0	0	0	0	0	0
Soltu.DM.02G027380.1	0	0	0	0	0	0	0	0	0	0	0	0	0	0	0	0	0	0	0	0	0	0	0	0	0	0	0	0	0	0
Soltu.DM.12G003470.1	0	0	0	28	13	0	26	0	0	0	15	0	0	15	0	29	8	43	6	14	0	30	0	0	0	0	0	19	0	0
Soltu.DM.04G015980.1	1218	726	564	477	529	650	567	922	589	452	643	564	387	577	602	757	637	814	604	475	480	620	329	403	606	447	478	627	667	386
Soltu.DM.01G030270.1	0	0	0	0	7	0	5	0	8	0	0	0	0	6	0	0	0	0	0	0	0	0	0	0	0	0	0	5	0	0
Soltu.DM.06G033260.1	310	0	49	28	144	148	1	127	0	102	187	13	94	125	196	37	190	132	234	97	0	0	213	86	30	38	170	100	50	170
Soltu.DM.04G037780.1	4089	3543	2046	2568	2942	2225	2575	3473	2024	2255	3573	2525	1538	3349	2509	2920	2234	3306	3498	2642	1916	3144	2507	2593	2162	2853	2202	3290	2786	2511
Soltu.DM.04G037780.2	288	98	146	96	174	217	104	371	55	192	155	293	219	150	209	115	209	150	325	71	105	144	183	73	204	92	217	139	229	98
Soltu.DM.06G033260.2	212	234	142	136	108	65	207	350	118	144	56	286	114	38	163	159	98	152	266	73	192	227	163	22	194	140	169	102	257	6
Soltu.DM.02G027390.1	161	369	90	213	409	111	286	288	43	182	602	153	48	374	236	381	135	815	250	372	119	617	191	423	103	503	211	473	159	579
Soltu.DM.11G025240.1	0	1	0	0	0	0	0	0	2	0	0	0	0	0	0	0	0	0	0	0	0	0	0	0	0	0	0	0	0	0
Soltu.DM.10G002870.1	1	0	0	0	3	2	2	3	2	2	0	0	0	0	1	0	2	1	1	0	0	0	2	2	0	0	0	0	0	0
Soltu.DM.07G014880.1	59	0	26	0	0	22	0	75	15	23	10	48	36	10	48	7	31	9	40	8	25	0	30	0	35	8	34	0	38	6
Soltu.DM.12G025780.3	0	0	0	0	0	0	0	0	0	0	51	0	0	0	0	0	0	0	0	0	113	0	0	0	0	0	0	0	0	0
Soltu.DM.12G001420.1	1763	1291	975	1025	1259	1076	1102	1625	268	889	1192	954	584	1064	1107	909	947	1292	1296	725	710	1156	906	798	997	1089	1162	1181	1172	995
Soltu.DM.09G008970.1	323	9	119	12	5	136	11	244	10	92	8	126	141	16	112	12	127	12	172	6	113	7	135	6	127	8	204	15	159	3
Soltu.DM.01G003490.1	239	147	96	155	168	96	225	263	59	127	266	162	79	197	153	157	86	256	166	152	53	242	99	149	101	134	153	220	103	141
Soltu.DM.12G023580.1	0	0	0	0	0	0	0	0	0	0	0	0	0	0	0	0	0	0	0	0	0	0	0	0	0	0	0	0	0	0
Soltu.DM.06G006020.1	0	0	0	0	0	0	0	0	0	0	0	0	0	0	0	0	0	0	0	0	0	0	0	0	0	0	0	0	0	0
Soltu.DM.07G023140.1	28944	8540	18050	5259	5652	15850	4667	30064	3916	8321	7031	18696	17379	8750	11111	3202	10129	4821	14934	3937	10256	5849	10699	4229	13836	7498	14679	5636	19989	6251
Soltu.DM.04G012200.1	92	54	59	39	34	37	63	115	66	32	66	72	32	82	92	79	61	45	108	71	25	63	38	68	50	32	73	75	26	28
Soltu.DM.08G002690.4	0	0	0	0	0	0	0	0	0	0	0	27	0	0	0	0	0	0	0	15	0	20	0	26	0	0	0	0	0	0
Soltu.DM.04G021420.1	9	20	0	38	23	0	19	3	108	2	24	3	0	47	0	95	3	73	0	38	0	41	0	7	0	9	0	61	3	14
Soltu.DM.01G016710.1	0	0	0	0	0	0	0	0	0	0	0	0	0	0	0	0	0	0	0	0	0	0	0	0	0	0	0	0	0	0
Soltu.DM.08G002690.3	5	3	2	2	5	0	0	20	0	2	11	0	2	2	0	3	7	2	4	3	0	5	0	2	0	0	0	3	7	2
Soltu.DM.08G002690.1	24	37	1	144	32	20	11	13	1	12	23	0	2	0	55	62	23	67	12	30	33	27	29	1	9	43	89	14	0	1
Soltu.DM.03G001870.2	0	0	0	0	0	0	0	0	0	0	0	0	0	0	0	0	0	0	0	0	0	0	0	0	0	0	0	0	0	0
Soltu.DM.07G001960.1	0	0	0	0	0	0	3	0	191	0	15	0	0	90	0	104	0	11	0	31	0	0	0	12	0	0	0	25	0	0
Soltu.DM.03G001870.1	39	13	0	5	15	16	0	31	29	0	146	35	8	47	19	59	13	49	58	37	13	42	28	66	25	19	53	82	23	66
Soltu.DM.S000750.1	0	0	0	0	0	0	0	0	0	0	0	0	0	0	0	0	0	0	0	0	0	0	0	0	0	0	0	0	0	0
Soltu.DM.10G008670.1	181	103	70	112	132	95	105	275	74	153	158	147	98	131	203	135	110	134	262	112	97	102	158	101	119	87	218	150	161	111
Soltu.DM.06G006030.1	0	0	0	0	0	0	0	0	0	0	0	0	0	0	0	0	0	0	0	0	0	0	0	0	0	0	0	0	0	0
Soltu.DM.07G025680.1	0	0	0	0	0	0	0	0	0	0	0	0	0	0	0	0	0	0	0	0	0	0	0	0	0	0	0	0	0	0
Soltu.DM.11G007270.1	1035	127	697	179	134	837	134	824	163	172	51	358	534	80	326	48	521	79	588	20	613	70	282	35	614	70	539	35	753	47
Soltu.DM.02G023400.1	1288	1615	589	1240	1468	556	1550	1016	694	843	1497	795	384	1369	676	1672	405	1934	843	1285	227	1505	680	1402	372	1164	639	1974	496	1392
Soltu.DM.02G023400.2	124	337	0	175	154	3	75	123	84	31	44	2	0	170	0	100	0	207	0	55	88	328	2	5	23	179	26	112	33	2
Soltu.DM.04G006820.5	0	0	81	0	0	0	0	0	0	0	0	0	0	0	0	0	0	0	0	0	0	0	0	0	0	0	0	0	0	0
Soltu.DM.04G006820.4	0	225	0	0	0	4	0	0	0	157	0	0	0	0	301	0	0	0	0	0	0	106	0	0	114	0	0	0	0	0
Soltu.DM.04G006820.7	1024	249	165	108	456	298	276	1886	221	200	571	644	242	539	174	318	372	751	440	383	489	449	432	266	77	218	393	339	457	175
Soltu.DM.04G006820.6	2497	1604	766	1278	1051	1163	933	704	1064	1151	935	882	669	1543	1520	1253	1344	1323	2514	941	1101	1532	1118	986	1072	1075	1534	1112	1416	1039
Soltu.DM.04G006820.1	0	0	26	0	0	0	1	0	0	0	0	0	0	0	0	0	0	0	0	0	0	0	0	0	0	0	0	0	0	0
Soltu.DM.04G006820.3	0	0	0	59	0	0	51	181	0	0	0	0	53	0	0	0	0	0	213	0	0	0	0	0	0	0	0	0	0	0
Soltu.DM.01G043600.2	394	227	189	197	231	174	210	352	355	219	295	170	135	234	287	185	129	240	335	197	173	142	258	135	156	151	396	296	183	177
Soltu.DM.02G004770.1	24	3	13	12	4	18	12	83	31	37	39	20	0	29	22	48	4	19	32	54	11	33	18	80	6	35	21	89	5	26
Soltu.DM.04G000220.2	0	0	0	7	0	0	0	0	4	0	0	0	0	0	0	2	0	0	0	0	0	0	0	0	0	0	0	0	0	0
Soltu.DM.04G023880.1	12	15	0	0	5	0	0	9	0	0	9	0	0	3	14	0	0	7	15	7	0	6	0	0	0	6	11	9	0	5
Soltu.DM.06G003240.4	250	46	344	29	24	65	10	517	150	46	160	92	706	121	130	128	105	5	216	121	41	7	143	27	17	157	179	113	181	6
Soltu.DM.01G014670.1	8933	7494	4404	5130	6562	5170	5499	5262	2641	3984	6279	3857	2957	6479	4093	4903	4388	5677	5693	4403	4178	5854	4477	4409	5186	5769	3435	5857	6374	4859
Soltu.DM.06G003240.1	1424	472	1109	426	401	926	401	2081	631	1093	1289	1649	772	976	1099	782	602	467	1401	754	562	385	983	956	672	327	994	1067	735	395
Soltu.DM.06G003240.2	0	0	0	0	0	0	0	0	0	0	0	0	0	0	0	0	0	0	0	0	0	0	0	0	0	0	0	0	0	0
Soltu.DM.06G003240.3	0	0	0	0	0	0	0	0	0	0	0	0	0	0	0	0	0	0	0	0	0	0	0	0	0	0	0	0	0	0
Soltu.DM.01G024650.3	23	0	0	0	0	0	0	20	0	0	0	0	0	0	0	0	0	0	0	0	0	0	0	0	0	0	0	0	0	0
Soltu.DM.12G029650.1	5295	3198	2779	2013	1820	4001	1986	6216	604	1925	1832	3413	4638	2110	3158	799	3595	2685	2624	939	2495	1749	1953	1002	3756	2478	2990	1406	4832	1995
Soltu.DM.11G020850.1	987	725	431	394	311	987	360	1064	361	366	230	715	876	218	576	92	781	408	403	63	366	229	411	64	777	300	524	123	953	235
Soltu.DM.11G002840.1	1021	553	422	410	211	816	317	753	2056	97	546	339	618	794	881	79	1593	772	772	179	889	416	392	110	1233	517	785	199	1624	259
Soltu.DM.10G019930.3	383	203	161	149	218	230	183	371	152	199	189	237	114	174	300	258	238	280	245	132	136	256	165	45	242	145	239	239	287	57
Soltu.DM.05G017630.1	0	5	0	4	10	0	10	0	0	0	2	0	0	9	3	18	0	36	0	8	0	17	0	10	0	5	0	14	0	6
Soltu.DM.11G019750.1	0	0	0	0	0	0	0	0	0	0	0	0	0	0	0	0	0	0	0	0	0	0	0	0	0	0	0	0	0	0
Soltu.DM.01G035420.1	4144	1433	2265	1429	1774	2041	1678	5040	1146	2705	2013	2560	1705	1871	2829	2073	1828	2609	2800	1436	1373	2026	1904	1476	1964	1667	2732	2446	2450	1678
Soltu.DM.02G018170.2	314	399	121	489	498	265	129	905	365	555	1139	516	189	516	716	275	130	458	925	408	128	281	557	355	769	717	866	391	526	361
Soltu.DM.02G018170.1	2440	1576	1197	927	1349	1028	1442	1988	966	1066	1124	1241	1030	1522	1410	1396	1239	1612	1854	1244	1071	1547	1180	1298	599	973	811	1710	1156	1248
Soltu.DM.09G009040.1	4	0	0	0	0	3	0	0	0	0	0	0	0	0	0	0	0	0	0	0	0	0	0	0	0	0	0	0	0	0
Soltu.DM.11G006230.1	648	153	273	119	127	511	131	413	267	184	175	307	310	167	278	87	277	153	402	107	183	103	254	91	319	139	327	136	403	72
Soltu.DM.12G012670.1	0	0	0	0	0	0	0	0	0	0	0	0	0	0	0	0	0	0	0	0	0	0	0	0	0	0	0	0	0	0
Soltu.DM.01G030600.1	0	0	0	0	0	0	0	0	0	0	0	0	0	0	0	0	0	0	0	0	0	0	0	0	0	0	0	0	0	0
Soltu.DM.01G010180.1	0	0	0	0	0	0	0	0	0	0	0	0	0	0	0	0	0	0	0	0	0	0	0	0	0	0	0	0	0	0
Soltu.DM.09G016710.1	1199	860	632	586	800	619	687	1199	461	678	840	706	496	677	912	659	729	795	1229	645	455	664	722	641	572	615	857	761	766	592
Soltu.DM.08G004290.1	37	40	26	13	58	32	35	11	19	16	38	10	0	24	13	5	15	9	42	8	0	7	22	28	0	12	14	15	16	25
Soltu.DM.06G005700.1	17	116	6	73	149	17	129	16	47	17	112	31	4	108	10	108	2	333	15	155	0	317	8	177	0	170	0	204	6	168
Soltu.DM.02G010560.1	312	63	95	59	24	23	0	297	0	134	0	43	126	60	114	95	143	55	106	37	0	0	88	84	0	109	36	124	475	0
Soltu.DM.02G010560.3	763	65	94	151	157	184	112	381	91	99	119	248	147	164	485	191	264	228	661	233	191	372	376	271	211	8	203	281	273	3
Soltu.DM.02G010560.2	679	511	624	313	440	772	444	875	210	431	699	538	393	485	338	212	589	451	517	241	485	323	471	168	726	563	842	324	267	516
Soltu.DM.02G010560.4	236	8	10	4	0	0	19	12	0	6	7	5	5	7	81	238	4	4	223	6	70	14	7	73	12	5	6	151	175	51
Soltu.DM.07G023430.2	431	98	56	149	172	131	260	402	282	172	248	108	31	284	105	353	71	428	165	256	17	297	110	28	21	80	105	152	21	132
Soltu.DM.07G023430.1	635	387	366	473	383	187	276	462	716	276	430	480	343	315	331	448	215	479	309	137	186	415	166	372	321	338	268	568	322	291
Soltu.DM.03G026290.1	81	87	54	70	74	23	61	79	48	66	92	51	36	61	43	53	31	89	38	68	28	73	59	81	32	76	46	68	24	54
Soltu.DM.08G010200.2	4	115	8	5	3	0	0	75	0	7	0	1	0	0	0	0	2	4	2	0	0	36	1	0	0	3	7	0	7	5
Soltu.DM.08G010200.3	4	91	4	33	58	12	68	7	2	2	22	32	25	0	2	3	9	19	4	2	6	16	89	16	26	2	57	9	4	25
Soltu.DM.08G010200.1	206	320	160	255	292	100	207	267	67	268	86	68	51	74	117	48	124	256	274	60	183	285	158	48	147	392	217	64	250	246
Soltu.DM.08G020870.1	0	0	0	0	0	0	0	2	0	0	0	0	0	0	0	0	2	0	0	0	0	0	1	0	0	0	0	0	0	0
Soltu.DM.04G011130.1	0	0	9	0	0	15	0	0	0	0	0	0	0	0	0	0	0	0	0	0	0	0	0	0	0	0	0	0	0	0
Soltu.DM.04G022170.1	0	0	0	0	0	0	0	0	0	0	0	0	0	5	0	5	0	0	0	0	0	0	0	0	0	0	0	0	0	0
Soltu.DM.07G024370.1	12	9	0	11	14	17	12	19	0	15	6	7	16	22	15	9	11	5	14	9	0	7	6	16	10	7	14	9	11	0
Soltu.DM.06G001110.1	126	46	31	33	37	85	36	188	18	41	16	65	59	43	63	14	38	28	106	12	31	0	71	7	68	20	63	0	55	13
Soltu.DM.12G016960.1	0	0	0	0	0	0	0	0	1	0	0	0	0	0	0	0	0	0	0	0	0	0	0	0	0	0	0	0	0	0
Soltu.DM.05G018340.1	0	0	0	0	0	0	0	0	0	0	0	0	0	0	0	0	0	0	0	0	0	0	0	0	0	0	0	0	0	0
Soltu.DM.03G022690.1	0	0	0	0	0	0	0	0	0	0	0	0	0	0	3	0	0	0	0	0	0	0	0	0	0	3	0	0	0	0
Soltu.DM.08G029050.1	655	254	296	0	305	341	272	630	865	407	324	410	297	290	453	402	415	394	490	231	276	292	252	193	340	194	387	348	398	223
Soltu.DM.12G011270.1	791	934	487	501	674	282	575	571	122	364	272	165	99	160	339	177	219	887	163	144	230	847	108	179	226	706	193	195	264	589
Soltu.DM.01G000970.1	2200	1519	1063	1221	1536	1187	1308	2111	4495	1043	2113	1359	944	1775	1444	1780	1009	1695	1716	1473	856	1500	1144	1610	931	1522	1564	2156	1262	1430
Soltu.DM.11G012700.3	3	0	0	17	0	13	0	0	0	8	4	0	15	0	0	11	0	0	8	0	5	11	1	0	0	14	22	15	0	0
Soltu.DM.04G004720.1	8745	3717	4399	3030	3768	6741	3560	4957	3257	3486	2050	3642	3331	1814	4781	2751	4505	3855	3984	1301	3200	2521	3581	1369	4945	2456	4661	2657	6487	2538
Soltu.DM.11G012700.1	83	74	39	20	12	62	67	90	33	71	34	9	9	53	113	56	82	56	81	23	21	10	45	4	58	24	42	19	86	15
Soltu.DM.12G025990.1	236	132	106	94	119	134	99	323	49	191	254	194	131	171	210	122	99	151	229	136	92	67	151	149	125	84	189	140	136	109
Soltu.DM.04G001360.1	15	2	7	0	2	3	3	3	2	5	0	11	0	0	32	0	7	3	35	0	15	3	4	0	8	0	18	0	27	0
Soltu.DM.09G023730.1	380	90	222	78	113	236	141	537	513	576	158	216	143	644	2437	258	689	112	688	182	255	183	417	104	164	53	530	218	225	48
Soltu.DM.11G012700.4	20	0	0	0	0	0	0	12	16	0	0	0	0	2	0	0	0	0	4	0	0	0	0	0	2	10	28	3	26	0
Soltu.DM.04G007960.1	8	1	4	1	0	3	0	0	0	0	0	0	2	0	0	0	3	0	0	0	2	0	0	0	1	0	0	0	1	0
Soltu.DM.01G001140.1	0	0	0	0	0	0	0	0	0	0	0	0	0	0	0	0	0	0	0	0	0	0	0	0	0	0	0	0	0	0
Soltu.DM.10G013270.1	0	0	0	0	0	0	0	0	0	0	0	0	0	0	0	0	0	0	0	0	0	0	0	0	0	0	0	0	0	0
Soltu.DM.01G023920.1	187	1351	62	361	829	167	583	741	555	131	766	530	313	873	233	491	84	1311	678	443	66	469	387	523	82	575	450	553	118	286
Soltu.DM.11G012710.1	0	0	0	0	0	0	0	0	0	0	0	0	0	0	0	0	0	0	0	0	0	0	0	0	0	0	0	0	0	0
Soltu.DM.05G024220.1	209	166	93	159	193	93	200	159	175	80	194	133	59	182	75	105	65	186	98	87	51	176	87	120	53	117	100	172	83	129
Soltu.DM.08G018170.1	34	17	13	21	15	16	17	14	17	18	26	21	18	24	28	16	10	24	21	24	9	20	12	13	0	16	14	22	20	17
Soltu.DM.06G022180.2	2707	1298	1185	1542	1677	1271	1460	1949	751	1653	898	893	562	786	972	1299	739	2415	913	696	630	2038	759	647	746	1200	798	1516	954	1452
Soltu.DM.06G022180.1	2	2	0	0	0	0	18	1	0	0	2	4	6	2	3	0	7	152	0	0	0	0	3	0	0	23	0	0	0	0
Soltu.DM.03G027300.1	3233	3795	1349	2724	3306	1386	3205	3038	2249	2042	4853	2332	1082	4782	1504	4473	1061	4407	1717	3271	836	3935	1326	3156	1005	2826	1580	4569	1426	2855
Soltu.DM.08G001590.1	0	0	0	0	0	0	0	0	0	0	0	0	0	0	0	0	0	0	0	0	0	0	0	0	0	0	0	0	0	0
Soltu.DM.08G004310.1	0	15	5	20	24	0	58	6	17	3	40	0	0	29	0	38	8	23	0	14	0	18	3	10	5	0	0	36	9	11
Soltu.DM.04G004040.1	729	222	352	175	278	305	191	824	333	354	396	523	313	453	573	217	340	214	684	315	232	194	504	310	332	244	607	386	382	208
Soltu.DM.01G031730.1	214	200	121	121	126	161	108	128	108	108	132	101	66	123	127	117	60	112	201	93	106	91	107	73	106	129	54	171	186	82
Soltu.DM.01G033740.1	0	0	0	0	0	0	0	0	0	0	0	0	0	2	0	0	0	0	0	0	0	0	0	0	0	0	0	0	0	0
Soltu.DM.04G004040.2	0	0	0	0	0	0	0	0	0	0	0	0	0	0	0	0	0	0	0	0	0	0	0	0	0	0	0	0	0	0
Soltu.DM.11G026570.1	5	3	7	3	15	48	73	10	8	3	9	1	33	56	0	4	1	2	25	2	0	8	2	3	3	3	24	11	11	3
Soltu.DM.06G021550.1	0	0	0	0	0	0	0	0	0	0	0	0	0	0	0	0	0	0	0	0	0	0	0	0	0	0	0	0	0	0
Soltu.DM.11G004950.1	21	20	13	15	26	11	13	26	2	18	18	12	7	9	12	15	7	22	23	18	5	13	14	0	13	18	19	17	16	27
Soltu.DM.01G047340.1	771	665	465	711	811	506	566	855	713	616	857	579	425	664	600	604	426	1130	539	663	405	785	607	670	446	727	797	800	389	668
Soltu.DM.01G047340.2	67	90	0	56	91	2	109	135	68	53	12	26	6	117	18	12	41	49	3	0	0	23	0	32	5	13	0	5	123	0
Soltu.DM.01G047340.3	105	80	26	9	62	0	123	121	107	25	0	73	0	0	200	186	0	0	315	8	0	124	43	0	47	54	38	83	169	215
Soltu.DM.01G016290.1	0	0	0	0	0	0	0	0	0	0	0	0	0	0	0	0	0	0	0	0	0	0	0	0	0	0	0	0	0	0
Soltu.DM.09G024560.1	2200	1315	1391	1108	1372	1431	1131	2212	520	1160	1194	1703	1415	1178	1224	887	998	1420	1494	711	793	1170	1137	782	1183	1306	1258	1155	1504	987
Soltu.DM.05G002290.1	0	0	0	0	0	0	0	0	0	0	0	0	0	0	0	0	0	0	0	0	0	0	0	0	0	0	0	0	0	0
Soltu.DM.03G037650.1	129	109	29	103	212	35	170	62	152	64	65	74	22	51	40	93	26	218	34	56	27	197	28	58	36	108	37	164	53	153
Soltu.DM.02G020380.1	3	0	0	3	0	3	0	0	10	0	0	0	0	2	2	0	0	6	0	5	0	0	0	0	0	0	0	0	0	0
Soltu.DM.04G031750.1	1233	455	567	366	415	692	365	1006	229	308	328	470	386	342	586	351	552	494	520	217	553	405	341	250	608	367	449	330	754	380
Soltu.DM.08G029930.2	30	28	41	18	6	34	24	84	7	6	20	25	12	30	30	6	20	33	30	17	16	19	21	5	27	6	32	7	22	1
Soltu.DM.06G015810.1	294	191	152	168	209	173	185	270	135	140	194	166	146	191	212	149	145	268	267	136	130	189	189	124	132	193	234	191	191	150
Soltu.DM.06G035150.1	1392	864	665	782	931	644	788	1643	1122	830	1151	1000	652	945	842	922	595	994	1205	746	554	931	962	729	640	777	1067	1098	811	767
Soltu.DM.06G016870.1	65	49	47	32	39	54	36	83	40	36	43	57	51	35	68	18	49	43	82	37	38	34	55	25	45	29	72	61	55	10
Soltu.DM.11G007770.1	872	35	296	100	308	50	16	522	0	153	30	32	27	71	108	41	447	143	255	4	239	248	557	9	279	0	189	270	61	14
Soltu.DM.11G007770.2	514	960	353	469	567	649	661	214	111	386	565	529	354	390	678	378	217	452	1240	350	374	190	423	390	272	555	624	312	512	388
Soltu.DM.07G026100.1	3917	4233	3270	2683	3452	2573	2820	6540	1366	2972	4062	4397	3534	4587	3906	1699	2674	2928	4614	2229	2208	3007	3511	2661	3407	4355	4644	3317	4556	3850
Soltu.DM.09G024570.1	2749	1171	1313	1113	1085	1252	1252	2718	7643	1777	3492	1799	1276	3481	2225	3345	1066	1733	2654	2188	843	1721	2047	1959	1052	1214	2253	2818	1158	957
Soltu.DM.03G013590.1	806	569	442	553	457	330	426	811	212	463	417	410	253	383	427	475	362	713	615	379	224	631	343	347	269	457	339	458	357	495
Soltu.DM.05G014780.1	0	0	0	0	0	0	0	0	0	0	0	0	0	0	0	0	0	0	0	0	0	0	0	0	0	0	0	0	0	0
Soltu.DM.05G014780.2	3	0	0	0	0	0	0	0	0	0	0	0	0	0	0	0	0	0	0	0	0	0	0	0	0	0	0	0	0	0
Soltu.DM.01G011990.1	8	16	7	5	14	8	11	18	10	22	17	9	8	14	15	8	11	10	16	7	8	9	13	12	6	12	9	15	9	10
Soltu.DM.04G019050.1	368	220	126	268	267	150	246	289	326	121	530	223	88	558	158	486	137	444	236	311	94	265	134	317	127	189	171	526	196	175
Soltu.DM.05G006460.1	3542	1821	1741	1486	1644	1931	1497	2916	1278	1892	1660	1970	1472	1524	2043	1390	1760	2010	2262	1112	1373	1833	1675	1094	1580	1475	1569	1721	2075	1425
Soltu.DM.04G015590.1	0	0	0	0	0	0	0	0	0	0	0	0	0	0	0	0	0	0	0	0	0	0	0	0	0	0	0	0	0	0
Soltu.DM.08G000580.1	339	42	379	50	51	437	33	755	81	403	139	637	375	159	237	55	205	65	599	82	127	34	399	72	98	50	556	78	138	46
Soltu.DM.05G014020.1	0	0	0	0	0	0	0	0	0	0	0	0	0	0	0	0	0	0	0	0	0	0	0	0	0	0	0	0	0	0
Soltu.DM.07G014120.1	8699	3674	3943	3433	4108	5804	3672	9087	3164	3768	3180	5435	3795	2935	6773	3973	5512	5446	8061	2289	4322	3518	4539	2153	5293	2933	7063	3641	6941	2759
Soltu.DM.06G016770.1	0	90	0	57	79	0	44	0	21	0	51	0	0	22	0	20	0	65	0	0	0	47	0	21	0	29	0	32	0	34
Soltu.DM.08G003310.1	901	478	424	379	494	640	466	907	160	473	411	610	436	345	811	475	730	685	805	277	478	529	509	296	600	429	785	474	773	402
Soltu.DM.04G008050.1	6	0	10	0	0	7	4	0	0	0	0	5	2	2	8	0	2	0	2	0	0	0	7	0	2	0	3	0	0	0
Soltu.DM.06G034420.2	3	3	31	1	57	2	1	4	1	2	2	1	2	3	1	2	2	32	3	3	23	3	2	15	2	50	63	1	1	2
Soltu.DM.09G008830.1	0	0	0	0	0	0	0	0	0	0	0	0	0	0	0	0	0	0	0	0	0	0	0	0	0	0	0	0	0	0
Soltu.DM.06G034420.1	4060	2672	2031	2042	2801	2061	2365	4405	787	2632	2955	3177	1656	2526	3950	1874	2431	2676	5689	2042	2149	2423	4288	2035	2314	2283	3740	2482	3430	2078
Soltu.DM.03G032420.1	12	26	14	22	23	19	19	25	0	47	11	25	16	10	4	0	7	16	0	0	4	7	4	0	5	17	0	0	8	6
Soltu.DM.09G001620.3	0	0	0	0	0	0	0	0	0	0	0	0	0	0	0	0	0	0	0	0	0	0	0	0	0	0	0	0	0	0
Soltu.DM.07G027000.1	6	20	0	0	40	4	10	8	25	0	4	6	0	0	0	7	0	20	6	14	0	37	6	14	0	15	4	33	0	11
Soltu.DM.11G013440.1	5	0	17	0	4	11	0	0	0	3	0	0	0	0	0	0	0	0	5	0	0	0	0	0	0	0	0	0	0	0
Soltu.DM.09G028210.1	0	0	0	0	0	0	0	0	2	0	0	0	0	0	0	0	0	0	0	0	0	0	0	0	0	0	0	0	0	0
Soltu.DM.02G029200.1	136	126	49	47	100	72	56	137	108	49	225	50	101	269	151	120	94	75	146	126	90	67	75	91	84	88	138	119	121	65
Soltu.DM.04G014380.1	0	0	0	0	0	0	0	0	0	0	0	0	0	0	0	0	0	0	0	0	0	0	0	0	0	0	0	0	0	0
Soltu.DM.02G023800.1	20142	9538	10295	5944	4789	14259	4867	24504	780	5688	4850	15613	23208	5302	10857	1638	10514	6264	10129	2067	8146	5169	7517	2327	13146	7090	10432	3354	15158	4379
Soltu.DM.01G036510.1	1588	1149	955	923	1203	1124	1013	1473	505	684	782	949	804	688	983	604	1060	1343	1013	481	1012	1216	593	436	1145	1121	1106	824	1485	1149
Soltu.DM.10G029760.1	55	13	52	9	3	47	11	53	73	77	45	29	65	37	52	17	83	20	77	30	22	2	57	18	48	6	51	24	41	2
Soltu.DM.11G025490.1	38	73	0	38	60	24	41	25	45	38	109	32	10	56	47	35	16	51	83	71	14	33	33	52	18	28	50	46	38	27
Soltu.DM.12G017820.1	5	0	0	0	0	0	0	0	0	0	0	4	3	0	5	0	0	0	0	0	0	0	2	0	0	0	0	0	3	0
Soltu.DM.02G016190.1	12	0	25	0	10	29	6	22	0	9	0	9	50	3	34	0	30	4	9	0	20	0	6	0	26	3	12	7	28	0
Soltu.DM.02G025470.7	82	288	255	315	82	369	550	87	568	117	266	345	260	248	433	214	83	355	85	166	215	77	612	14	6	76	113	250	82	42
Soltu.DM.02G025470.6	7	0	8	0	0	11	0	0	0	0	0	19	0	10	0	0	0	0	0	4	0	0	0	0	0	0	0	7	10	0
Soltu.DM.02G025470.5	0	134	0	0	0	0	0	13	0	0	0	0	0	0	0	0	0	0	0	0	0	0	0	0	0	0	0	0	16	0
Soltu.DM.02G025470.4	80	63	14	41	51	33	88	60	110	49	43	33	13	4	24	22	83	41	55	15	22	5	22	43	69	20	37	12	39	25
Soltu.DM.02G025470.3	693	29	268	144	597	3	15	696	33	627	173	224	195	297	4	4	300	219	631	189	158	461	5	323	322	441	474	227	570	430
Soltu.DM.02G025470.2	26	160	7	25	0	79	82	0	83	30	9	5	8	0	97	47	44	6	36	0	27	16	82	19	0	0	15	0	7	12
Soltu.DM.02G025470.1	2	0	0	0	0	0	0	10	0	0	0	0	0	0	1	0	0	0	0	0	0	0	0	0	81	0	0	0	0	0
Soltu.DM.10G023980.1	0	0	0	708	32	0	59	0	297	0	132	0	0	232	0	1036	0	580	0	362	0	304	0	88	0	22	0	553	0	131
Soltu.DM.05G012580.1	850	349	466	359	496	443	457	834	238	573	665	756	466	586	548	385	302	446	698	406	232	426	615	568	443	504	753	700	631	484
Soltu.DM.01G029320.1	0	0	0	11	0	0	0	0	13	0	10	0	0	0	0	6	0	0	0	4	0	5	0	0	0	0	0	4	0	0
Soltu.DM.04G021830.1	0	4	0	5	6	13	11	67	3	15	4	21	0	3	6	8	0	2	0	4	0	0	0	0	4	0	9	6	15	5
Soltu.DM.06G027070.2	21	14	4	0	135	5	73	13	0	30	8	2	13	14	5	66	9	38	13	11	7	70	1	79	4	6	127	141	2	4
Soltu.DM.03G021080.1	63	40	22	183	129	21	86	58	72	48	38	24	17	50	53	301	66	484	64	104	26	145	36	12	29	20	34	143	47	54
Soltu.DM.08G017160.1	27	23	21	29	32	24	23	15	23	0	25	13	6	21	7	31	22	46	12	23	25	41	13	22	29	32	6	49	32	46
Soltu.DM.11G022360.2	408	209	192	189	168	250	158	342	235	85	163	183	139	193	213	226	222	268	310	187	202	223	144	145	219	174	224	162	332	149
Soltu.DM.04G023720.1	0	0	0	0	0	0	0	0	0	0	0	0	0	0	0	0	0	0	0	0	0	7	6	0	0	0	0	3	0	0
Soltu.DM.11G022360.1	10	0	0	1	2	0	0	2	2	38	8	0	0	1	3	0	0	0	2	0	0	2	0	0	2	0	3	0	0	0
Soltu.DM.09G025040.1	4941	1494	1656	1582	588	515	1680	6137	859	7169	3016	8527	3326	2164	4778	658	229	1608	1317	1995	56	580	5703	2166	625	926	2756	1764	681	525
Soltu.DM.09G012830.1	0	0	0	0	0	0	0	0	0	0	0	0	0	0	0	0	0	0	0	0	0	0	0	0	0	0	0	0	0	0
Soltu.DM.06G023950.2	0	77	0	63	42	131	38	273	5	74	0	78	107	0	50	61	0	15	107	114	83	86	21	2	70	0	138	26	64	30
Soltu.DM.06G023950.3	2436	1214	1009	936	1008	882	950	2886	679	1366	1401	1398	881	1386	2682	1079	1591	1250	2590	1014	1113	1241	1484	963	1109	1023	1663	1292	1418	886
Soltu.DM.06G023950.1	0	0	0	0	0	32	0	118	0	0	0	0	61	47	0	0	0	143	0	0	0	0	0	114	0	0	0	45	0	0
Soltu.DM.05G003950.1	450	197	180	138	153	234	182	519	52	368	202	264	151	165	350	178	189	195	405	117	150	123	332	125	235	165	404	175	301	120
Soltu.DM.08G017370.1	3	0	4	0	0	8	0	7	0	21	0	8	0	0	15	0	9	0	19	0	10	3	0	0	0	0	10	0	14	0
Soltu.DM.01G018560.1	0	0	0	0	0	0	0	0	0	0	0	0	0	0	0	0	0	0	0	0	0	0	0	0	0	0	0	0	0	0
Soltu.DM.03G025590.1	1591	372	475	217	329	412	315	542	110	233	166	326	199	219	432	226	352	575	864	249	300	472	256	205	357	343	467	303	422	283
Soltu.DM.02G001110.1	0	0	0	0	0	0	0	0	0	0	0	0	0	0	0	0	0	0	0	0	0	0	0	0	0	0	0	0	0	0
Soltu.DM.07G011160.1	0	0	0	0	0	0	0	0	0	0	0	0	0	0	0	0	0	5	0	2	0	0	0	0	0	0	0	0	0	0
Soltu.DM.10G019240.1	0	0	0	0	0	0	0	0	4	0	0	0	0	0	0	0	0	0	0	0	0	0	0	0	0	0	0	0	0	0
Soltu.DM.01G046960.1	748	564	344	457	537	396	465	575	808	447	636	438	195	401	495	555	333	539	666	341	264	499	519	434	397	492	552	639	461	417
Soltu.DM.04G018310.1	0	0	0	0	0	0	0	0	0	0	0	0	0	0	0	0	0	0	0	0	0	0	0	0	0	0	0	0	0	0
Soltu.DM.06G025680.1	16	0	0	0	0	0	0	3	3	0	0	0	0	0	0	0	0	0	0	0	3	0	0	0	4	0	5	0	0	0
Soltu.DM.04G024900.1	1203	660	639	455	673	718	665	1521	181	891	782	824	812	594	625	314	492	339	904	201	332	280	556	201	384	386	658	288	477	259
Soltu.DM.01G000560.1	0	31	0	19	16	3	28	0	61	0	19	11	0	20	0	18	0	11	0	7	0	23	0	14	0	29	0	6	0	0
Soltu.DM.03G036980.1	652	12	359	6	0	352	13	774	0	236	47	381	346	46	580	0	398	0	748	27	267	24	375	11	308	20	464	30	468	0
Soltu.DM.03G036980.2	51	0	3	0	0	7	0	55	0	28	6	24	0	0	47	13	0	0	34	0	34	0	14	0	20	0	13	0	27	0
Soltu.DM.03G036980.3	15	4	43	12	10	5	0	19	28	31	0	2	28	0	15	1	8	33	10	0	3	0	0	0	10	0	31	2	14	12
Soltu.DM.11G024250.1	686	194	347	241	263	281	235	700	278	474	336	414	308	299	515	321	226	192	461	258	116	199	351	224	144	207	379	425	202	204
Soltu.DM.01G010750.2	207	0	48	58	64	29	120	164	0	0	182	74	62	0	81	107	62	220	59	0	73	52	0	52	0	95	0	0	0	0
Soltu.DM.01G010750.1	20439	11963	9617	12735	14842	9549	12411	22077	2208	13328	10358	13381	8624	9766	16220	13755	10449	16768	16050	7694	6162	14257	10036	7245	9172	9475	11250	13503	12128	9776
Soltu.DM.08G018400.1	8251	4991	3908	3106	3511	5438	3217	9758	1663	3947	3669	5247	5195	4059	6442	1884	5335	4208	5403	2095	3686	3536	3857	1901	5367	3961	4171	2881	6617	3179
Soltu.DM.08G018400.2	211	224	46	41	55	74	130	183	34	0	23	26	23	111	2	24	169	18	1	45	44	93	1	78	38	85	0	0	49	23
Soltu.DM.01G046250.1	0	0	0	0	0	4	0	0	0	0	0	4	0	0	15	0	0	0	0	0	0	0	0	0	0	0	0	0	0	0
Soltu.DM.02G031750.3	0	0	0	0	0	0	0	0	0	0	0	0	0	0	0	0	0	0	0	33	0	0	0	0	0	0	0	68	0	0
Soltu.DM.02G031750.2	150	69	0	89	85	88	59	106	92	94	98	107	0	90	104	105	81	70	87	50	84	89	49	4	56	98	59	111	83	60
Soltu.DM.02G031750.1	181	103	137	50	121	88	110	177	80	62	107	89	129	89	118	97	90	114	136	54	32	93	127	87	70	29	119	3	102	83
Soltu.DM.07G004860.1	0	0	0	6	0	0	0	0	44	0	10	0	0	5	0	14	0	3	0	16	0	0	0	6	0	0	0	65	0	0
Soltu.DM.01G010740.1	1516	1309	616	898	1094	775	878	1265	972	592	1385	971	550	1245	958	1141	652	1189	1348	1076	564	1095	868	1002	621	949	1060	1363	832	936
Soltu.DM.02G002280.1	16	14	0	4	6	5	9	12	0	4	8	0	0	9	0	0	4	4	9	2	0	4	12	8	4	5	5	17	5	5
Soltu.DM.12G020040.1	529	459	226	248	394	235	279	431	23	299	290	316	247	367	407	205	258	362	634	273	284	339	482	238	275	309	336	309	369	304
Soltu.DM.08G015250.1	0	12	0	0	6	0	0	0	5	0	0	0	9	0	0	0	0	8	4	5	0	0	0	0	0	4	0	6	0	0
Soltu.DM.07G006120.1	6310	1673	2782	2538	3230	2631	3421	4770	311	2296	645	1537	2277	390	1021	832	604	3633	1405	472	779	3264	841	397	1159	2478	1064	751	1682	2383
Soltu.DM.10G017360.1	625	15	318	72	18	338	63	361	62	168	15	229	307	79	286	92	284	115	405	54	238	89	121	17	293	23	368	100	318	25
Soltu.DM.05G005230.1	0	0	0	0	0	0	0	0	4	0	4	0	0	2	0	3	0	0	0	0	0	3	0	0	0	0	0	0	0	2
Soltu.DM.08G002350.1	673	7	328	8	85	376	121	606	90	495	23	432	280	81	0	0	44	3	0	0	24	0	35	0	0	0	0	0	24	0
Soltu.DM.08G025590.1	25	11	9	0	0	18	6	10	7	5	11	19	6	8	8	17	8	4	5	4	5	3	0	0	0	0	0	0	0	0
Soltu.DM.08G020770.1	2	0	0	0	0	0	3	0	5	0	2	0	0	0	0	4	0	0	0	0	0	0	0	0	0	0	0	0	0	0
Soltu.DM.04G018150.1	264	244	159	200	244	167	150	234	189	147	272	183	124	180	197	195	127	175	332	142	157	229	231	189	174	169	131	218	247	193
Soltu.DM.08G014620.1	147	7	0	10	0	167	0	137	0	0	0	7	3	0	15	0	0	10	5	0	36	0	5	0	82	0	0	1	115	8
Soltu.DM.11G003190.1	560	257	312	483	292	289	317	890	259	457	390	522	349	377	456	492	329	472	361	246	154	351	257	178	268	213	247	326	304	225
Soltu.DM.05G022610.1	797	98	358	73	62	441	98	487	111	282	51	233	313	82	476	52	487	132	461	28	427	107	310	28	437	66	436	43	601	72
Soltu.DM.08G028260.3	61	9	4	26	0	40	9	6	1	5	0	42	4	6	8	10	15	101	214	2	6	7	3	17	19	5	20	15	9	39
Soltu.DM.08G028260.2	64	0	0	0	0	0	0	0	0	0	0	0	0	0	0	0	0	0	0	0	0	0	0	0	0	0	0	0	0	18
Soltu.DM.01G017690.1	2796	1754	1629	1433	1396	1728	1329	3095	2026	1701	1675	2402	1740	1531	2042	1039	1757	1717	2772	940	1494	1463	1825	1168	1932	1619	2329	1384	2544	1504
Soltu.DM.12G022000.1	0	0	0	0	0	0	0	0	0	0	0	0	0	0	0	0	0	0	0	0	0	0	0	0	0	0	0	0	0	0
Soltu.DM.04G030940.1	127	94	80	56	99	122	47	112	44	56	53	90	61	46	110	56	63	61	145	32	48	38	108	64	78	57	77	60	109	37
Soltu.DM.08G028260.4	44	0	0	0	0	0	0	93	0	0	0	0	20	0	98	0	0	43	0	0	0	0	0	0	0	45	0	0	33	0
Soltu.DM.01G040110.1	10369	9282	6205	8213	11278	5644	8677	11720	1956	7358	10282	8726	5156	8718	7528	7370	5147	9119	9384	6131	4153	8501	7896	6870	6179	8811	8739	9303	8148	8471
Soltu.DM.07G016390.2	71	10	57	7	34	22	53	245	74	42	44	34	2	84	90	42	194	49	225	77	8	40	2	8	12	34	29	50	28	35
Soltu.DM.07G016390.1	1509	883	684	789	924	881	817	1430	1400	967	775	1001	619	737	972	782	725	1110	1387	517	763	836	957	571	831	657	1146	813	1219	719
Soltu.DM.09G013840.1	0	0	0	0	0	0	0	0	0	0	0	0	0	0	0	0	0	0	0	0	0	0	0	0	0	0	0	0	0	0
Soltu.DM.01G051060.2	0	0	0	0	0	0	0	0	0	0	0	0	0	73	0	0	0	0	0	0	0	0	0	0	0	0	0	0	0	0
Soltu.DM.01G051060.1	4184	2473	1918	2130	2133	1985	1869	4022	2991	1930	3201	2317	1482	3292	2437	3508	1947	3003	3116	2234	1465	2577	1711	2055	1752	1863	2305	3068	2299	1677
Soltu.DM.05G004270.1	0	0	0	29	3	0	0	0	86	0	31	0	0	37	3	34	0	33	0	11	0	9	0	0	3	0	3	11	0	8
Soltu.DM.01G009990.1	1019	577	394	692	557	491	561	878	463	413	553	496	350	501	572	803	439	959	704	417	394	720	299	377	491	493	511	688	599	522
Soltu.DM.03G004460.1	0	0	0	0	0	0	0	0	0	0	0	0	0	0	0	0	0	0	0	0	0	0	0	0	0	0	0	0	0	0
Soltu.DM.05G015630.1	0	0	0	0	0	0	0	0	0	0	0	0	0	0	0	0	0	0	0	0	0	0	0	0	0	0	0	0	0	0
Soltu.DM.05G015200.1	0	0	0	0	0	0	0	0	0	0	0	0	0	0	0	0	0	0	0	0	0	0	0	0	0	0	0	0	0	0
Soltu.DM.05G013400.1	0	0	0	0	0	0	0	0	0	0	0	0	0	0	0	0	0	0	0	0	0	0	0	0	0	0	0	0	0	0
Soltu.DM.11G004640.1	10113	5626	5458	3700	3705	6786	3494	8571	1253	3217	2996	4920	5889	3722	4617	1573	5507	4317	4583	1844	4573	4108	3408	1909	6454	4992	4713	2245	7655	3461
Soltu.DM.01G051600.6	13	32	0	0	44	3	86	87	34	36	53	5	0	0	172	112	0	0	83	12	45	55	29	39	49	25	65	42	44	30
Soltu.DM.11G011340.1	1706	704	930	593	630	1087	576	1517	251	782	692	949	766	608	994	630	1025	785	1263	440	848	657	879	504	1119	697	1016	647	1479	557
Soltu.DM.09G015950.1	61	54	50	34	53	54	35	72	11	45	50	44	28	35	0	0	4	0	0	0	0	0	0	0	0	0	0	0	0	0
Soltu.DM.06G033610.4	970	1261	379	382	648	238	583	1420	59	558	847	541	378	930	1288	462	298	1084	1072	369	409	911	746	478	320	678	300	632	400	498
Soltu.DM.06G033610.5	1043	1035	447	552	916	421	748	1616	69	693	1433	1156	477	1092	1233	661	542	1298	1075	534	385	992	1078	519	406	580	1109	639	796	1029
Soltu.DM.06G033610.1	415	339	610	964	1005	423	596	436	55	575	417	437	528	375	476	578	356	219	514	323	230	505	629	130	392	565	346	579	537	134
Soltu.DM.06G033610.2	20	80	34	19	60	8	51	120	19	24	18	9	15	20	13	22	16	43	11	35	27	23	20	30	16	46	34	18	56	23
Soltu.DM.06G033610.3	434	292	87	362	416	259	538	404	83	526	387	308	269	367	128	292	291	184	529	426	194	131	103	564	360	424	325	598	303	615
Soltu.DM.01G011910.1	566	347	292	338	337	607	250	636	57	415	181	360	367	231	975	326	707	566	732	179	533	331	372	143	634	203	683	306	775	214
Soltu.DM.05G012500.1	2	0	0	0	0	0	0	0	0	0	0	0	0	0	0	0	0	0	0	0	0	0	0	0	0	0	0	0	0	0
Soltu.DM.08G028540.1	5	12	0	52	10	0	39	28	7	2	54	0	0	76	23	100	42	76	19	20	19	37	0	13	2	5	16	34	32	19
Soltu.DM.07G003020.2	1471	823	776	626	589	1027	284	1044	234	732	748	565	470	597	744	490	695	37	586	226	344	536	625	376	568	441	512	827	804	582
Soltu.DM.07G003020.1	1034	489	461	260	419	606	601	718	128	0	347	580	631	531	430	235	585	1182	838	463	809	538	356	277	805	502	555	138	793	148
Soltu.DM.01G027830.1	8694	2305	4663	1913	2567	6535	1994	12132	774	4588	2208	7503	5504	2170	6958	2279	6132	2888	12774	1999	5278	2292	6701	1934	6028	2240	9600	2615	8971	1978
Soltu.DM.02G030660.1	36	5	23	95	6	35	41	58	150	5	152	20	28	162	40	164	52	86	41	32	27	23	16	34	27	2	28	62	80	22
Soltu.DM.01G015770.1	0	0	0	0	0	0	0	0	0	0	0	0	0	0	0	0	0	0	0	0	0	0	0	0	0	0	0	0	0	0
Soltu.DM.04G013530.1	0	0	0	0	0	0	0	0	0	0	0	0	0	0	0	0	0	0	0	0	0	0	0	0	0	0	0	0	0	0
Soltu.DM.01G047180.1	458	460	194	569	744	231	755	314	672	256	472	243	115	351	160	460	121	1023	136	391	61	749	111	452	83	670	188	805	92	744
Soltu.DM.09G010910.1	0	0	0	0	0	0	0	0	0	0	0	0	0	0	0	0	0	0	0	0	0	0	0	0	0	0	0	0	0	0
Soltu.DM.08G027890.2	0	0	0	0	0	0	0	0	0	0	0	0	0	0	0	0	0	71	0	0	0	0	0	0	0	0	0	0	0	0
Soltu.DM.12G008700.1	0	0	0	0	0	0	0	0	0	0	0	0	0	2	0	0	0	0	0	0	0	0	0	0	0	0	0	0	0	0
Soltu.DM.01G036090.1	1271	790	604	722	894	684	659	1130	247	546	883	732	506	776	741	834	632	821	971	646	567	802	600	639	670	767	782	882	876	739
Soltu.DM.01G036090.2	0	0	36	0	0	0	69	0	0	25	0	0	0	0	0	0	0	117	0	0	0	0	43	0	0	0	0	0	0	0
Soltu.DM.02G008060.1	1274	64	599	136	42	1013	174	1820	217	547	293	687	1017	483	1413	466	1396	81	1550	150	945	60	537	87	1001	69	1227	164	1447	49
Soltu.DM.12G001210.1	392	4	122	6	0	397	0	880	10	88	9	308	314	14	234	20	111	3	561	11	260	0	168	18	154	0	601	27	154	4
Soltu.DM.06G013740.1	6	4	0	0	0	0	0	0	0	0	7	3	13	0	0	0	0	0	0	0	4	0	0	0	0	0	7	0	0	0
Soltu.DM.06G018910.1	83	114	82	115	96	20	115	169	299	378	190	111	22	160	99	237	63	389	35	259	15	276	117	295	22	175	71	357	21	228
Soltu.DM.03G006520.1	562	263	222	158	173	358	183	514	102	230	210	334	249	216	324	90	311	200	379	148	151	191	211	153	261	180	303	171	275	134
Soltu.DM.11G025080.1	1243	650	644	516	692	699	615	814	182	552	597	573	363	472	631	487	550	622	794	387	498	510	618	384	655	543	585	555	726	500
Soltu.DM.01G011250.1	7	0	16	10	12	18	8	4	0	0	4	0	0	0	0	0	0	0	0	0	0	0	0	0	0	0	0	0	0	0
Soltu.DM.12G023860.2	0	0	79	55	0	0	0	221	0	0	0	35	0	0	0	0	61	0	0	0	25	0	0	0	0	0	75	0	0	0
Soltu.DM.12G023860.1	2345	896	1038	821	979	1199	706	2375	507	1395	1226	1280	923	1341	1765	1297	966	1053	1759	950	778	955	993	629	1030	832	1525	1467	1198	798
Soltu.DM.05G007950.1	201	33	137	104	28	133	47	87	0	79	160	142	108	112	103	89	119	105	226	16	151	84	3	81	112	31	115	43	153	80
Soltu.DM.03G011940.1	0	6	7	8	0	4	8	0	5	0	5	8	0	0	5	5	0	0	9	0	3	0	0	7	0	0	0	0	0	0
Soltu.DM.05G007950.2	891	379	329	225	271	613	281	788	360	199	328	510	465	469	321	306	216	430	288	384	270	364	388	292	371	352	398	501	613	272
Soltu.DM.09G000480.2	55	3	3	2	4	19	1	41	2	6	0	4	1	2	29	4	3	2	49	3	24	2	5	3	21	2	3	0	2	4
Soltu.DM.02G015990.1	674	268	471	312	236	658	283	871	300	626	268	546	424	220	348	178	621	302	448	79	529	283	248	97	685	221	409	124	854	280
Soltu.DM.12G005860.1	240	98	102	98	136	89	103	242	130	128	142	166	102	106	194	149	100	171	187	72	87	143	116	85	104	118	163	146	176	96
Soltu.DM.09G000480.1	0	122	0	80	39	55	2	243	3	132	79	0	28	122	89	288	0	151	11	0	136	114	153	0	0	0	3	79	171	0
Soltu.DM.06G019810.1	0	0	0	0	0	0	0	0	0	0	0	0	0	0	0	0	0	0	0	0	0	0	0	0	0	0	0	0	0	0
Soltu.DM.12G009200.1	0	8	0	0	5	0	0	30	4	0	0	0	0	3	0	0	0	5	6	0	0	3	0	0	0	5	5	4	0	0
Soltu.DM.07G024960.1	2409	1256	1040	1082	1259	1348	1079	2009	571	1127	1124	1292	847	1093	1334	1315	1385	1480	1850	893	1101	1176	1072	910	1360	1012	1352	1322	1698	871
Soltu.DM.09G020920.1	339	308	52	220	385	230	289	347	66	255	274	319	170	5	280	182	163	286	460	204	163	281	304	193	240	25	321	185	280	287
Soltu.DM.12G023350.7	30	29	40	20	43	24	5	25	5	79	13	14	8	27	18	13	13	20	36	98	11	29	13	46	80	47	79	19	44	15
Soltu.DM.12G023350.6	152	191	235	196	145	107	211	299	30	105	101	193	18	363	154	311	130	405	496	348	229	256	174	191	359	78	673	224	178	100
Soltu.DM.12G023350.1	15	8	0	9	7	7	3	19	2	26	8	12	10	11	15	10	11	31	17	26	17	9	15	9	6	13	14	35	11	7
Soltu.DM.12G023350.3	1686	1387	831	937	1561	1253	1216	1963	705	1028	2001	1888	1364	1189	1582	404	1092	642	1628	319	569	472	1624	921	674	1495	943	797	1693	1113
Soltu.DM.12G023350.2	765	633	175	362	467	269	384	645	97	528	465	194	218	512	398	281	339	693	690	447	253	614	439	556	364	47	525	349	405	183
Soltu.DM.06G021560.1	0	0	0	0	0	0	0	0	0	0	0	0	0	0	0	0	0	0	0	0	0	0	0	0	0	0	0	0	0	0
Soltu.DM.10G022710.1	9560	2056	5843	1481	1526	4842	1261	13761	741	4113	868	4911	3750	1254	5822	731	5423	2246	6745	884	7457	2224	2981	889	6450	2269	4335	1206	12712	2127
Soltu.DM.11G002190.1	349	122	161	76	96	97	63	329	26	352	73	202	71	44	162	38	126	106	67	30	59	82	36	48	92	77	60	80	114	111
Soltu.DM.03G001210.1	0	0	0	0	0	0	0	0	0	14	0	3	8	0	0	0	0	0	0	0	0	0	0	3	0	0	0	0	0	0
Soltu.DM.09G001580.1	698	57	244	108	93	291	174	258	94	65	105	111	133	85	147	143	121	159	187	50	133	151	105	39	128	69	216	126	192	88
Soltu.DM.01G016550.1	0	0	0	0	0	0	0	0	2	0	0	0	0	0	0	0	0	0	0	0	0	0	0	0	0	0	0	0	0	0
Soltu.DM.08G017670.1	114	82	84	77	88	73	81	108	85	101	100	110	68	83	87	55	56	92	94	57	42	65	70	67	62	78	96	106	90	86
Soltu.DM.03G037800.2	1592	622	579	370	597	661	625	1310	0	993	531	1032	322	360	759	116	192	845	426	401	618	904	1006	146	256	0	108	563	995	0
Soltu.DM.07G021720.1	0	0	0	0	0	0	0	0	0	0	0	0	0	0	0	6	0	0	3	0	0	0	0	0	0	0	0	0	0	0
Soltu.DM.02G021580.1	80	0	11	30	0	20	2	4	28	4	8	3	0	11	10	38	19	38	22	5	19	18	9	0	30	0	17	20	21	10
Soltu.DM.03G037800.1	631	732	442	672	689	324	385	710	147	621	926	343	665	1022	773	834	858	532	1842	522	303	361	537	775	755	1030	853	792	340	908
Soltu.DM.08G020390.3	168	29	6	6	0	75	12	29	20	137	64	8	35	11	22	7	7	57	94	11	33	23	46	16	2	17	33	8	16	10
Soltu.DM.06G011120.2	0	0	0	0	0	0	0	0	2	5	0	0	0	0	0	3	0	0	3	6	0	0	2	0	0	0	2	0	0	4
Soltu.DM.06G030920.1	30	111	13	58	71	1	49	7	33	10	76	8	2	53	7	72	1	84	5	33	1	91	7	44	3	51	2	58	3	39
Soltu.DM.06G011120.1	1143	962	540	686	753	463	772	1165	753	795	957	657	595	872	638	917	480	1165	745	564	326	894	570	537	479	647	650	888	636	710
Soltu.DM.07G017610.1	10	12	14	9	14	6	11	10	1	8	16	14	7	13	6	4	7	4	5	5	3	5	8	8	6	12	5	10	2	11
Soltu.DM.08G020390.1	153	109	168	135	0	79	128	90	144	0	127	153	51	128	138	128	129	84	193	121	107	80	177	109	175	148	148	168	254	61
Soltu.DM.05G023950.1	6232	3553	3490	2757	4177	5401	3293	6481	1446	4488	2559	4961	3368	1956	5736	2055	3588	3332	6604	1543	2664	2428	5613	1689	4188	2845	6411	2693	5614	2375
Soltu.DM.09G017620.1	0	0	0	0	0	0	0	0	3	0	0	0	0	0	0	0	0	0	0	0	0	0	0	0	0	0	0	0	0	0
Soltu.DM.08G007880.1	0	0	0	0	0	0	0	0	0	0	0	0	0	0	0	0	0	0	0	0	0	0	0	0	0	0	0	0	0	0
Soltu.DM.01G040190.1	1888	942	938	555	817	1088	741	1058	639	657	496	712	538	507	1026	538	985	702	1292	336	689	615	800	346	877	547	955	546	1083	506
Soltu.DM.03G011260.1	0	0	0	0	0	0	0	0	2	0	0	0	0	0	0	1	0	0	0	0	0	0	0	0	0	0	0	0	0	0
Soltu.DM.01G005690.1	0	0	0	0	0	0	0	0	0	0	0	0	0	0	0	0	0	0	0	0	0	0	0	0	0	0	0	0	0	0
Soltu.DM.01G039940.1	290	131	164	105	157	122	153	167	507	63	101	122	78	83	177	156	140	368	120	138	87	435	55	92	122	202	84	231	124	241
Soltu.DM.07G016170.1	14	35	0	23	13	0	12	3	37	0	22	0	3	18	4	32	0	58	13	12	0	19	0	0	5	7	0	16	0	11
Soltu.DM.05G017030.1	11	176	0	91	198	0	108	10	60	6	21	7	0	37	5	54	14	419	0	23	0	241	0	70	0	175	0	127	0	121
Soltu.DM.01G043200.1	1573	898	858	687	921	849	761	1721	1915	1014	983	1092	768	719	964	648	704	904	1218	497	567	785	833	542	797	813	978	788	893	753
Soltu.DM.01G026310.1	60	0	27	0	0	39	0	40	5	17	0	35	14	0	90	0	34	2	38	0	39	0	13	0	56	6	32	0	71	3
Soltu.DM.10G001920.1	6393	2918	2991	2601	3219	3108	2870	5965	1573	2320	4579	3497	2533	3529	4464	4033	3342	3552	6280	2914	1980	2591	3187	3040	2842	2493	5444	4292	4174	2820
Soltu.DM.01G034360.1	790	474	338	340	421	420	318	1276	233	443	507	653	437	514	793	345	393	359	1033	389	338	331	773	382	413	446	750	430	554	328
Soltu.DM.09G021030.1	2	0	0	0	0	0	0	0	0	0	0	0	0	0	0	1	0	1	0	2	0	0	0	0	0	0	0	0	0	0
Soltu.DM.10G017690.1	52	83	19	35	0	30	0	81	252	0	249	0	0	65	16	147	21	40	78	100	0	62	10	0	38	75	0	61	0	25
Soltu.DM.10G017690.3	109	0	0	19	74	0	0	62	311	0	285	22	0	0	0	245	38	67	0	0	0	54	0	0	0	422	217	192	0	54
Soltu.DM.10G017690.2	1627	2011	843	1713	2054	848	1973	2335	5556	994	2280	1555	987	2692	1483	2172	922	2559	1883	1842	869	2143	1121	2052	922	1671	1037	3386	1302	1920
Soltu.DM.09G026010.1	68	19	30	71	3	22	9	53	36	18	10	24	15	38	109	0	108	40	341	2	177	74	40	2	174	87	308	3	137	48
Soltu.DM.10G017690.4	40	0	0	0	0	0	0	0	0	0	53	0	0	0	0	0	0	13	0	0	39	0	0	0	0	0	356	0	0	0
Soltu.DM.04G028750.1	2	0	2	0	3	3	0	2	3	2	2	2	2	3	0	3	0	0	0	2	2	3	2	2	2	0	2	3	0	0
Soltu.DM.10G017690.6	21	57	17	8	21	23	36	16	14	9	106	9	29	177	14	562	41	79	113	551	17	184	27	104	6	62	66	56	3	34
Soltu.DM.03G025750.1	0	0	0	0	0	0	0	0	0	0	0	0	0	0	0	0	0	0	0	0	0	0	0	0	0	0	0	0	0	0
Soltu.DM.03G020450.1	2214	943	1123	1020	1086	783	1095	1924	1828	1377	1207	1236	647	1027	1294	1161	1114	1494	1028	682	748	1311	997	800	886	1039	1391	1686	1397	1351
Soltu.DM.03G025750.2	0	0	0	0	0	0	0	0	0	0	0	0	0	0	0	0	0	0	0	3	0	0	0	0	0	0	0	0	0	0
Soltu.DM.01G024360.1	0	0	0	0	0	0	0	0	0	0	0	0	0	0	0	0	0	0	0	0	0	0	0	0	0	0	0	0	0	0
Soltu.DM.10G007590.1	204	122	118	112	93	114	81	174	38	96	105	121	75	92	116	113	112	130	156	58	87	91	103	80	104	77	152	115	118	105
Soltu.DM.02G021440.3	1360	1171	793	1041	1479	638	1258	1408	225	1002	1302	929	794	955	1402	839	841	1253	1784	867	742	942	1484	771	803	929	1276	1118	896	919
Soltu.DM.09G001060.1	3	0	0	27	0	0	8	6	7	0	11	0	0	13	3	39	15	23	0	7	3	6	0	0	0	0	0	13	0	12
Soltu.DM.10G003730.3	7105	4162	3487	3346	4619	5419	3857	5549	890	3611	2546	3487	2872	2174	5595	2551	4743	3753	5152	1509	3279	3161	4012	1639	4339	2795	4987	2750	5610	2729
Soltu.DM.10G003730.2	0	0	0	0	0	0	0	0	0	0	0	0	0	0	0	0	0	0	0	0	0	0	0	0	0	0	0	0	0	0
Soltu.DM.01G044100.1	80	61	28	85	137	53	99	26	76	6	26	0	8	57	112	95	46	259	29	20	43	204	8	57	33	109	23	113	63	69
Soltu.DM.S000140.1	68	63	50	62	71	47	65	95	61	40	59	58	49	52	56	51	41	76	89	29	31	49	54	48	51	48	80	58	45	41
Soltu.DM.04G003960.1	18	23	12	7	11	31	10	9	10	9	10	10	12	11	13	2	13	12	12	2	16	5	10	2	20	6	17	5	24	14
Soltu.DM.09G023790.2	0	0	0	0	0	0	0	0	77	0	0	0	0	0	0	0	0	0	0	0	0	0	0	0	0	0	0	0	0	0
Soltu.DM.02G010760.3	2	35	0	126	91	196	100	0	0	106	72	0	18	206	25	243	4	0	3	98	126	128	180	38	5	42	0	54	264	51
Soltu.DM.02G010760.2	0	0	0	0	0	0	0	0	0	0	0	0	0	0	0	0	0	0	0	0	0	0	0	0	0	0	0	0	0	0
Soltu.DM.02G010760.1	266	0	170	0	0	0	0	292	272	24	0	192	178	0	307	0	171	250	311	13	0	15	0	0	150	7	163	54	9	9
Soltu.DM.10G008870.1	0	0	0	0	0	0	0	0	0	0	0	0	0	0	0	0	0	0	0	0	0	0	0	0	0	0	0	0	0	0
Soltu.DM.05G004770.1	0	0	0	0	0	0	0	0	0	0	0	0	0	0	0	0	0	0	0	0	0	0	0	0	0	0	0	0	0	0
Soltu.DM.05G004770.2	816	479	331	317	426	517	337	641	355	293	225	290	233	235	619	330	492	508	808	232	501	369	487	220	342	285	584	282	496	234
Soltu.DM.10G014160.1	0	0	0	0	0	0	0	0	0	0	0	0	0	0	0	0	0	0	0	0	0	0	0	0	0	0	0	0	0	0
Soltu.DM.08G015540.2	0	0	0	0	0	0	0	0	0	0	0	0	0	0	0	0	49	0	0	0	0	0	0	0	0	43	0	0	0	0
Soltu.DM.09G001070.1	12346	4936	6249	3199	2733	10240	2725	14306	1792	2992	2784	9021	11195	3807	6992	997	8227	3418	7137	1438	5918	2878	3665	1484	9261	4049	7091	2080	11078	2330
Soltu.DM.12G020280.1	13	338	0	220	454	0	260	20	20	12	471	16	0	361	14	313	0	317	20	329	7	240	0	214	0	262	14	337	0	211
Soltu.DM.08G014730.1	0	6	4	0	5	13	0	7	2	0	0	7	0	9	10	0	5	6	19	5	10	3	17	0	0	6	15	10	7	6
Soltu.DM.06G032390.1	10118	6799	4512	4597	4949	4734	4291	9530	1876	4936	7128	5542	3558	6429	7044	4886	5269	6019	11399	4618	4861	5966	7913	4596	4165	4476	6207	6194	5296	4349
Soltu.DM.10G020590.2	140	147	104	75	129	120	110	196	127	120	81	33	75	204	157	135	95	99	216	126	123	47	51	128	52	135	115	150	194	41
Soltu.DM.09G026820.1	181	135	95	84	93	120	92	121	48	89	147	160	85	99	127	82	64	92	185	92	63	81	136	71	114	73	70	90	127	87
Soltu.DM.01G020470.1	113	175	79	144	160	75	133	128	152	88	193	109	71	164	132	166	71	186	168	110	68	142	102	144	69	163	121	158	141	124
Soltu.DM.08G012930.2	385	165	216	229	366	231	315	453	120	164	231	395	100	147	292	253	244	366	400	152	166	171	277	307	268	248	295	269	413	208
Soltu.DM.06G018990.1	20	4	6	10	6	25	3	31	0	24	6	14	19	7	8	3	8	7	8	7	9	3	13	3	7	7	17	2	18	6
Soltu.DM.06G012860.1	31	9	20	13	13	7	26	15	0	5	12	11	15	32	17	0	8	21	37	16	16	14	8	7	12	8	9	0	13	9
Soltu.DM.01G037890.1	144	16	83	25	31	121	41	162	12	42	47	81	78	82	106	51	67	12	97	52	47	12	40	42	76	13	54	68	67	25
StCLE20	0	0	0	0	0	0	0	4	2	1	2	0	0	0	0	0	0	0	4	0	4	0	0	2	0	0	3	2	0	0
Soltu.DM.07G025430.1	5125	1869	2077	1473	1664	1918	1640	5850	560	2914	3836	3149	2488	3904	3724	3760	1923	2703	4322	2596	1424	2037	2370	2593	1521	1433	3380	3559	2148	1419
StCLE22	71	49	48	58	57	33	56	30	24	25	53	30	17	77	34	75	19	96	20	82	13	106	11	41	16	71	24	67	12	67
StCLE23	65	2	55	6	7	46	14	43	16	30	8	32	29	9	50	5	30	13	59	7	26	7	60	7	38	0	55	9	59	9
StCLE24	2	2	0	0	0	0	0	0	3	0	0	0	0	0	0	2	5	1	0	0	0	2	0	0	0	1	0	0	0	0
StCLE25	0	7	0	0	0	0	0	0	0	0	0	0	0	0	0	5	0	3	0	1	0	0	0	0	0	0	0	6	0	2
StCLE27	5	1	0	0	3	2	0	5	0	2	2	4	3	2	3	0	5	0	1	0	2	0	3	0	2	2	0	0	5	0
StCLE28	0	0	0	19	5	0	6	0	6	0	3	0	0	2	2	24	0	43	0	2	0	10	0	0	0	0	0	9	0	7
StCLE29	0	0	0	0	0	0	0	0	0	0	0	0	0	0	0	0	0	0	0	0	0	0	0	0	0	0	0	0	0	0
Soltu.DM.02G032210.1	0	0	28	180	38	0	152	197	326	0	272	0	0	180	54	324	69	262	51	36	76	71	7	45	94	7	17	46	246	82
Soltu.DM.08G006870.1	0	0	0	0	0	0	0	0	2	0	0	0	0	0	0	0	0	0	0	0	0	0	0	0	0	0	0	0	0	0
Soltu.DM.09G000890.1	34	32	22	17	33	22	43	33	39	18	28	24	10	42	35	27	17	39	62	21	5	34	37	17	6	11	46	24	16	16
Soltu.DM.04G035920.1	232	47	53	45	20	71	32	377	84	20	175	244	80	180	346	101	251	18	1307	53	226	75	433	45	153	78	703	70	233	61
Soltu.DM.01G023740.1	9	7	6	5	0	4	0	13	0	7	14	4	8	0	0	0	3	6	11	0	0	3	7	0	5	6	10	6	6	4
Soltu.DM.02G015520.1	5	0	0	0	2	2	0	3	4	0	0	0	0	0	0	0	0	0	2	6	0	0	0	0	0	0	0	4	0	0
Soltu.DM.01G009660.1	0	0	0	0	0	0	0	0	0	0	0	0	0	0	0	0	0	0	0	0	0	0	0	0	0	0	0	0	0	0
Soltu.DM.08G007280.1	15	9	2	6	10	13	9	6	2	2	8	7	1	4	3	10	2	3	10	5	8	9	5	5	6	4	7	12	7	9
Soltu.DM.07G015120.1	1499	884	762	1108	826	1327	878	1958	523	954	884	1010	565	783	995	1264	745	1862	1635	607	512	1128	744	441	800	791	1003	972	1102	836
Soltu.DM.06G000830.1	123	130	68	111	119	97	143	117	105	63	145	96	51	152	87	118	65	180	124	90	65	146	80	79	60	96	69	121	73	105
Soltu.DM.06G027020.4	3674	1400	1846	1433	1865	2818	1536	2483	1361	1890	1024	2089	1472	0	2380	1188	2046	1769	2308	650	1525	1193	1742	0	2199	1038	2220	1191	2696	1291
Soltu.DM.08G015540.1	2686	1814	1438	1494	1919	1598	1571	3208	3532	2146	1792	2325	1384	1554	2424	1434	1553	1836	3719	1079	1314	1642	2615	1177	1565	1273	2744	1512	2011	1199
Soltu.DM.01G007870.1	0	0	0	0	0	0	0	0	0	0	0	0	0	0	0	0	0	0	1	0	0	0	0	0	0	0	0	0	0	0
Soltu.DM.06G027910.3	5204	2075	2894	2036	2142	2658	2017	4880	5825	2664	1888	2999	2275	1211	2485	2266	2465	2914	2685	1183	1770	2015	1648	1083	2290	1827	2298	1867	3188	1598
Soltu.DM.09G008840.1	0	0	0	0	0	0	0	0	3	0	0	0	0	0	0	0	0	0	0	0	0	0	0	0	0	2	0	2	0	0
Soltu.DM.11G009140.1	0	0	0	0	0	0	0	0	0	0	0	0	0	0	0	0	0	0	0	0	0	0	0	0	0	0	0	0	0	0
Soltu.DM.09G000400.2	60	0	21	29	29	0	27	115	0	0	0	17	0	26	42	32	0	0	37	47	0	26	15	0	0	0	0	0	0	0
Soltu.DM.07G007670.1	0	0	0	0	5	0	0	4	0	0	0	0	0	0	5	0	0	0	1	0	0	0	0	4	0	0	2	0	0	0
Soltu.DM.08G007800.1	0	0	0	0	0	0	0	0	0	0	0	0	0	0	0	0	0	0	0	0	0	0	0	0	0	0	0	0	0	0
Soltu.DM.01G037110.1	5763	3107	3257	3098	4034	4064	3403	5562	1248	4070	2630	3969	3161	1879	5568	2603	3748	3528	4342	1387	2269	2670	3440	1821	3860	2473	4816	3105	5095	2545
Soltu.DM.09G017230.1	2031	1254	1031	996	1259	1250	1117	1501	844	968	1075	1109	793	1007	1376	947	1172	1357	1638	741	1022	1175	1242	807	1162	997	1223	1171	1596	920
Soltu.DM.04G011920.1	315	177	154	146	215	156	175	205	149	102	203	174	118	164	202	135	147	179	343	141	112	159	217	186	150	129	252	289	177	184
Soltu.DM.01G044990.1	0	0	0	0	0	0	0	0	0	0	0	0	0	0	0	0	0	0	0	0	0	0	0	0	0	0	0	0	0	0
Soltu.DM.06G018360.3	0	18	0	0	0	0	0	0	0	0	0	0	0	97	0	0	0	0	0	0	0	0	0	0	0	24	0	0	0	0
Soltu.DM.02G022330.1	0	0	0	0	0	0	0	0	0	0	0	0	0	0	0	0	0	5	0	0	0	4	0	0	0	0	0	0	0	0
Soltu.DM.06G021900.1	178	9	89	4	6	79	15	215	7	149	24	90	42	25	83	10	78	17	171	29	64	14	89	28	62	15	100	20	84	16
Soltu.DM.08G014410.1	0	0	0	0	0	0	0	0	0	0	0	0	0	0	0	0	0	0	0	0	0	0	0	0	0	0	0	0	0	0
Soltu.DM.08G001470.1	493	325	197	189	259	184	206	498	82	431	291	466	168	251	520	237	216	250	1149	228	242	236	871	320	203	223	902	345	240	148
Soltu.DM.10G015030.1	288	191	110	146	138	141	122	212	54	119	141	96	76	151	186	141	157	205	230	125	138	154	121	90	139	132	103	153	174	97
Soltu.DM.12G025010.1	1140	819	620	746	773	628	655	963	1081	546	973	700	440	845	609	751	478	707	718	675	338	718	513	717	570	757	764	972	595	690
Soltu.DM.04G029620.1	340	0	176	0	0	181	4	329	4	93	0	57	126	0	618	0	442	0	587	0	274	0	229	0	321	0	462	0	540	0
Soltu.DM.07G006750.2	2311	1430	1087	1232	1266	1066	1066	1589	268	778	1215	949	701	1149	1447	1074	1303	1420	1801	814	693	1202	1078	803	1072	984	1350	1262	1344	1004
Soltu.DM.S001040.1	0	0	0	0	0	0	0	0	0	0	0	0	0	0	0	0	0	0	0	0	0	0	0	0	0	0	0	0	0	0
Soltu.DM.07G006750.1	290	102	80	7	15	60	0	304	0	229	0	42	52	55	165	159	148	96	324	112	252	181	85	59	46	68	129	45	202	21
Soltu.DM.04G019310.1	0	0	0	0	0	0	0	0	0	0	0	0	0	0	0	0	0	0	0	0	0	0	0	0	0	0	0	0	0	0
Soltu.DM.09G027960.1	29	15	22	19	10	15	11	27	9	28	15	19	10	10	20	12	10	10	8	4	4	12	10	9	12	15	9	12	17	9
Soltu.DM.07G007930.1	204	170	102	147	213	136	138	160	256	92	242	147	93	255	108	154	91	179	199	176	89	220	119	180	135	156	159	246	149	146
Soltu.DM.07G017350.1	8	0	3	0	0	3	0	4	0	0	0	0	5	0	3	2	3	0	5	0	0	4	6	0	3	0	0	0	6	0
Soltu.DM.10G008530.1	0	0	0	0	0	0	0	0	0	0	0	0	0	0	0	0	0	0	0	0	0	0	0	0	0	0	0	0	0	0
Soltu.DM.01G050010.1	0	5	7	4	9	0	0	25	0	0	0	7	4	0	10	0	5	13	23	5	0	7	4	0	0	0	9	0	4	0
Soltu.DM.07G026570.1	1693	914	707	817	912	714	865	1504	979	842	765	1016	613	671	1017	662	614	1075	1057	540	378	845	738	560	563	878	1049	758	815	780
Soltu.DM.04G025290.2	0	0	0	0	0	0	0	0	0	0	0	0	0	0	0	0	0	0	0	0	0	0	0	0	0	0	0	0	0	0
Soltu.DM.04G036060.1	18	11	9	14	11	10	13	10	35	11	14	16	0	6	9	11	11	18	21	7	8	9	10	6	6	11	5	11	11	10
Soltu.DM.01G036750.1	609	378	289	315	351	331	358	777	814	376	555	451	283	538	556	420	328	461	757	390	290	344	418	397	309	327	636	540	431	332
Soltu.DM.11G007880.1	19	16	5	17	5	4	14	15	0	7	18	6	16	11	7	9	6	7	14	13	8	9	19	10	0	15	14	8	11	7
Soltu.DM.03G003800.1	214	113	120	134	117	114	101	204	76	106	121	186	97	126	160	107	104	125	213	102	78	96	135	117	110	95	215	152	108	120
Soltu.DM.04G010480.1	267	238	82	226	338	89	295	158	357	76	264	97	65	291	129	350	131	395	115	212	74	357	44	147	83	200	72	441	102	174
Soltu.DM.10G018910.1	0	31	0	17	28	0	16	0	42	0	9	0	2	8	0	38	0	20	0	11	0	27	0	22	0	22	0	32	0	26
Soltu.DM.03G027950.1	616	73	225	167	0	328	113	684	453	330	101	668	296	194	240	188	555	110	315	104	325	137	222	78	449	54	353	36	266	62
Soltu.DM.04G000900.1	7195	2814	3042	1861	2188	3317	2028	6187	883	2483	2316	3817	2208	2533	3405	1798	2779	2675	5539	1730	2593	2387	2925	1567	2481	1812	4138	2242	3225	1664
Soltu.DM.03G027950.2	608	5	285	42	150	422	5	316	272	328	199	120	376	405	564	496	98	138	601	86	192	0	314	24	367	0	361	131	715	0
Soltu.DM.09G020570.1	23	9	5	5	6	15	4	10	9	10	9	10	4	12	13	5	14	5	10	4	5	6	6	7	7	10	6	3	14	4
Soltu.DM.10G017280.1	0	0	0	0	0	0	0	0	0	0	0	0	0	0	0	0	0	0	0	0	0	0	0	0	0	0	0	0	0	0
Soltu.DM.06G017530.2	0	0	0	0	1	1	0	0	0	1	0	0	0	0	1	0	0	1	0	0	0	0	0	0	0	0	0	0	0	0
Soltu.DM.06G017530.1	517	252	210	202	236	265	222	515	145	226	219	227	169	254	340	242	254	328	375	192	240	268	241	175	267	141	294	236	388	171
Soltu.DM.06G017600.1	0	2	0	0	0	0	0	0	0	0	0	0	0	0	0	2	0	0	0	0	0	0	0	0	0	0	0	0	0	0
Soltu.DM.07G027400.1	0	0	0	0	0	0	0	0	0	0	0	0	0	0	0	0	0	0	0	0	0	0	0	0	0	0	0	0	0	0
Soltu.DM.05G010350.1	0	0	0	0	0	0	0	0	0	0	0	0	0	0	0	0	0	0	0	0	0	0	0	0	0	4	0	0	0	0
Soltu.DM.08G019510.1	0	0	0	0	0	0	0	0	0	0	0	0	0	0	0	0	0	0	0	0	0	0	0	0	0	0	0	0	0	0
Soltu.DM.07G013750.1	192	104	104	80	110	128	109	137	91	66	96	116	65	84	117	76	68	138	130	65	93	104	71	93	83	101	113	116	146	102
Soltu.DM.02G012560.1	1634	602	817	371	425	973	409	1807	500	922	648	1030	774	652	1125	339	776	485	1456	420	630	416	844	392	749	442	922	479	1007	369
Soltu.DM.12G009050.1	0	0	0	0	0	0	0	0	0	0	0	0	0	0	0	0	0	0	0	0	0	0	0	0	0	0	0	0	0	0
Soltu.DM.10G021980.1	1040	416	419	407	510	778	435	852	399	496	271	591	404	245	708	321	608	542	716	176	484	392	599	250	549	274	675	411	760	303
Soltu.DM.06G017860.1	2	0	5	0	2	14	2	5	0	10	2	6	4	4	2	2	3	5	1	2	3	5	5	6	5	5	5	3	4	1
Soltu.DM.10G022760.1	207	14	94	9	14	174	5	302	25	37	15	176	198	21	168	22	104	0	391	16	115	0	196	6	154	8	269	13	181	0
Soltu.DM.01G021490.1	1767	660	784	543	598	959	498	2070	592	1436	795	1215	692	644	1037	808	831	935	1070	553	581	802	524	576	767	654	800	837	1002	727
Soltu.DM.01G021490.2	105	72	0	5	0	31	20	196	3	21	2	13	25	42	64	0	0	75	43	0	0	3	13	3	0	0	3	3	26	2
Soltu.DM.02G001730.1	3	0	2	0	0	0	2	2	2	3	3	0	0	3	0	0	0	0	0	3	0	0	0	0	0	0	0	0	0	0
Soltu.DM.03G023550.1	0	4	0	0	0	0	0	5	0	0	0	0	0	0	0	0	0	0	0	0	0	0	0	0	0	0	0	0	0	0
Soltu.DM.10G025610.1	518	212	242	196	310	257	233	534	146	285	190	316	227	297	377	218	279	347	340	146	232	296	263	198	221	187	311	248	328	201
Soltu.DM.01G018120.1	0	0	0	0	0	0	0	0	0	0	0	0	0	0	0	0	0	0	0	0	0	0	0	0	0	0	0	0	0	0
Soltu.DM.04G001710.1	1	3	2	2	2	2	3	2	5	1	2	2	0	4	3	3	0	2	1	1	1	5	1	1	1	0	2	3	0	2
Soltu.DM.04G028560.1	11	26	13	9	7	9	18	15	30	23	56	21	0	49	22	63	19	20	31	49	5	24	10	40	16	22	25	61	16	14
Soltu.DM.01G045830.1	0	6	0	0	0	0	7	0	7	0	4	0	0	11	0	7	0	0	0	12	0	7	0	8	0	9	0	14	0	0
Soltu.DM.10G005720.1	20	0	18	8	0	12	4	38	0	0	0	4	21	13	35	31	30	8	9	6	20	0	0	0	31	0	14	0	35	0
Soltu.DM.10G000840.2	241	258	235	263	196	193	221	685	397	223	1	210	204	186	8	160	10	361	499	4	6	277	245	154	8	108	1	258	0	168
Soltu.DM.05G015820.1	0	0	0	0	0	0	0	0	3	0	0	0	0	0	0	0	0	0	0	0	0	0	0	0	0	0	0	0	0	0
Soltu.DM.01G008540.1	0	0	0	0	0	0	0	0	0	0	0	0	0	0	0	0	0	0	0	0	0	0	0	0	0	0	0	0	0	0
Soltu.DM.11G009170.1	408	263	184	232	268	223	217	422	121	233	262	251	205	267	309	220	236	267	438	187	152	228	238	150	214	230	388	236	254	200
Soltu.DM.02G032750.1	41	10	11	16	13	22	14	24	0	20	13	55	11	6	19	18	13	19	26	5	17	16	15	9	32	10	14	10	38	0
Soltu.DM.08G005140.1	9	0	7	0	8	7	7	13	5	6	0	7	8	3	20	0	10	10	17	3	5	8	11	4	0	8	7	7	6	8
Soltu.DM.08G029100.1	83	68	51	43	86	58	63	80	31	46	61	77	40	64	48	58	40	70	68	53	32	63	58	61	34	60	30	88	47	72
Soltu.DM.04G020570.1	17	10	9	6	0	15	5	18	2	7	8	16	9	14	14	13	15	12	23	7	14	16	7	4	19	14	13	12	26	8
Soltu.DM.04G015720.1	0	0	0	4	2	0	0	0	0	0	2	0	0	0	0	2	0	0	5	1	0	4	4	0	0	0	3	0	2	0
Soltu.DM.12G023860.4	3	0	0	6	54	2	8	11	0	3	16	168	0	0	0	0	87	9	14	5	0	4	0	252	11	3	3	9	7	0
Soltu.DM.07G009800.1	35	33	14	28	35	8	23	31	36	16	41	12	4	28	14	42	30	45	36	33	0	22	19	21	0	25	21	35	14	23
Soltu.DM.01G032480.3	334	292	1	3	0	97	0	76	165	66	872	159	1	743	93	1	310	1	109	555	3	112	185	0	33	0	0	723	255	0
Soltu.DM.01G032480.2	0	2	0	272	0	0	0	1	1	35	33	46	0	10	0	168	0	265	306	0	63	113	19	0	63	0	0	1	189	0
Soltu.DM.01G032480.1	28	388	226	332	704	113	720	386	579	8	150	98	192	130	288	800	20	520	0	0	210	686	14	589	211	752	353	156	13	674
Soltu.DM.06G022520.1	1006	359	529	400	453	658	427	669	591	495	369	486	428	282	630	356	600	508	687	209	544	369	541	226	695	394	655	397	870	389
Soltu.DM.03G028700.1	0	3	0	4	0	0	2	3	8	0	5	0	0	13	0	18	0	0	0	0	0	7	2	0	0	2	0	7	0	0
Soltu.DM.01G023330.1	15	10	0	45	0	0	0	0	0	0	0	0	0	18	0	106	3	0	0	0	0	10	0	3	0	0	0	21	12	10
Soltu.DM.11G011070.1	721	365	339	393	391	262	332	601	139	555	277	417	206	268	328	402	278	538	457	198	190	403	341	148	210	251	359	348	335	251
Soltu.DM.04G033460.1	9	2	3	2	2	5	5	0	43	0	3	0	0	12	4	22	8	6	5	12	0	8	0	8	0	0	0	18	5	0
Soltu.DM.02G015010.1	2224	1007	589	709	451	1002	804	1609	456	1409	1123	1132	842	1131	1654	555	343	1271	1943	826	778	490	1190	578	476	693	551	858	995	758
Soltu.DM.04G032690.1	0	0	0	0	0	0	0	0	0	0	0	0	0	0	0	0	6	0	0	0	0	0	0	0	0	0	0	0	0	0
Soltu.DM.08G019390.2	0	7	0	0	45	2	0	25	71	8	0	0	0	17	0	20	0	0	0	26	0	0	0	0	0	3	0	0	0	0
Soltu.DM.02G007780.1	0	0	0	0	0	0	0	0	0	0	0	0	0	0	0	0	0	0	0	0	0	0	0	0	0	0	0	0	0	0
Soltu.DM.10G016940.1	2257	1374	1230	899	981	1943	882	2745	1007	1069	546	1720	2210	581	1823	276	1442	868	1186	236	822	642	899	234	1463	863	1251	339	1677	600
Soltu.DM.01G013930.1	0	0	0	0	0	0	0	0	0	0	0	0	0	0	0	0	0	0	0	0	0	0	0	0	0	0	0	0	0	0
Soltu.DM.08G019390.1	85	47	57	153	39	40	69	155	57	53	126	86	44	61	98	143	85	138	94	46	89	62	49	65	114	30	87	133	151	61
Soltu.DM.09G025940.1	0	0	0	0	0	0	0	0	0	0	0	0	0	0	0	0	0	0	0	0	0	0	0	0	0	0	0	0	7	0
Soltu.DM.11G005180.1	8	0	6	0	0	0	8	3	3	8	4	0	0	5	0	0	0	0	0	0	0	0	0	0	0	0	0	0	0	0
Soltu.DM.01G033780.3	100	0	124	7	4	68	54	92	105	52	0	21	19	57	25	93	0	79	28	183	0	72	79	10	73	0	0	0	70	0
Soltu.DM.03G014620.1	3863	2655	1860	1654	2438	2727	1817	2369	358	1720	1664	1522	1336	1303	2202	1242	1988	1804	3345	1062	2054	1501	2391	1155	1963	1502	1647	1814	2409	1152
Soltu.DM.04G012040.1	3223	1088	2654	1011	1571	2577	2640	4689	528	3123	3330	3793	2654	5981	2183	2152	1331	1786	3049	2151	922	1456	2402	2545	1214	1130	4690	3850	1752	1374
Soltu.DM.01G044350.4	7598	4935	4846	3348	3578	4916	2122	7524	1588	4461	3724	5389	4175	4203	2577	2427	3541	4452	5014	2301	3026	5739	3387	3722	3588	3737	3967	2935	3808	3780
Soltu.DM.01G044350.2	2435	1148	1094	1148	1686	854	1168	1294	613	745	2029	1690	753	1519	1068	840	660	1733	1251	1441	605	925	1063	941	616	1505	1548	1749	1625	1757
Soltu.DM.01G044350.3	1823	2450	528	528	543	423	564	2572	1354	445	1169	658	544	1345	667	1002	1046	2410	1120	905	786	1573	845	979	769	747	655	1279	481	766
Soltu.DM.02G013620.1	11738	6453	6037	5524	7639	7259	6375	12980	1063	9825	5452	9019	5684	4421	11561	4316	7592	5973	10640	3077	4691	5224	8434	3562	6845	5121	9948	5073	8631	4490
Soltu.DM.01G044350.1	2390	1176	1280	1450	1811	1010	3396	1321	596	952	3239	1848	1351	1477	2009	838	700	1817	1304	1248	628	1047	1661	1104	616	2044	1807	2297	2237	2132
Soltu.DM.07G012260.3	8	4	8	3	0	0	0	0	0	11	0	3	6	3	9	0	0	8	3	3	0	0	9	0	3	0	5	8	8	0
Soltu.DM.07G012260.2	0	0	0	0	0	0	0	0	0	0	0	0	0	0	0	0	0	0	0	0	0	0	0	0	0	0	0	0	0	0
Soltu.DM.07G012260.1	1586	477	540	441	568	473	403	1588	427	831	305	603	495	325	1769	475	932	628	1763	269	749	475	1107	216	665	327	1347	439	1024	354
Soltu.DM.07G002710.2	61	0	29	43	0	0	0	123	119	0	72	124	6	16	0	2	0	52	2	0	32	116	0	0	0	0	0	0	0	0
Soltu.DM.01G015250.1	0	0	0	0	0	0	0	0	0	0	0	0	0	0	0	0	0	0	0	0	0	0	0	0	0	0	0	0	0	0
Soltu.DM.07G018530.2	761	382	433	389	366	69	418	729	0	223	464	491	292	334	513	120	438	322	736	335	386	328	326	182	427	306	294	257	284	296
Soltu.DM.02G000470.2	648	523	323	280	225	361	445	398	314	115	450	415	234	324	199	367	263	308	373	264	224	298	614	155	425	185	221	334	483	259
Soltu.DM.02G000470.1	1296	592	882	542	670	632	480	1261	809	979	1156	1206	917	1110	814	866	406	650	927	841	345	453	684	842	336	639	1046	1196	586	452
Soltu.DM.04G030660.1	333	143	150	99	107	140	121	206	242	170	397	156	83	408	177	284	74	162	213	300	78	196	158	213	77	139	83	289	98	123
Soltu.DM.11G004080.1	343	178	126	187	153	167	230	288	273	173	165	236	164	165	200	264	128	350	209	150	130	203	112	128	206	149	154	248	225	160
Soltu.DM.03G012230.1	0	0	0	0	0	0	0	0	0	0	0	0	0	0	0	0	0	0	0	0	0	0	0	0	0	0	0	0	0	0
Soltu.DM.07G012270.4	0	0	0	0	0	0	0	0	0	0	0	0	0	0	0	0	0	0	0	0	1	0	0	0	0	0	0	0	1	0
Soltu.DM.11G014580.1	0	0	0	0	0	0	0	0	0	0	0	0	0	0	0	0	0	0	0	0	0	0	0	0	0	0	0	0	0	0
Soltu.DM.02G011910.2	55	26	27	25	32	28	19	37	21	34	41	27	25	17	44	16	43	30	40	21	21	17	32	29	40	33	43	26	49	9
Soltu.DM.02G011910.1	40	25	15	28	24	16	23	43	27	37	37	40	18	37	10	22	6	34	57	16	21	35	34	11	17	8	20	29	32	16
Soltu.DM.09G013920.1	0	0	0	0	0	0	94	184	0	96	126	86	0	0	140	0	0	0	0	79	0	0	110	0	0	0	113	0	0	0
Soltu.DM.03G014180.1	0	13	3	0	10	4	0	0	23	0	3	0	0	0	0	12	0	15	8	17	9	0	0	0	0	0	0	0	0	0
Soltu.DM.02G019230.1	1383	64	765	40	30	593	41	1493	145	687	103	988	710	181	1306	148	903	63	2167	128	728	58	1206	100	942	32	1354	173	1097	44
Soltu.DM.04G000980.1	0	0	0	0	0	0	0	0	0	0	0	0	0	0	0	0	0	0	2	0	0	0	0	0	0	0	4	0	0	0
Soltu.DM.04G003030.1	0	0	0	0	0	0	0	0	2	0	0	0	0	0	0	0	0	0	0	0	0	0	0	0	0	0	0	0	0	0
Soltu.DM.11G014590.1	59	48	0	14	26	12	20	46	24	22	24	22	9	40	44	22	14	36	63	20	22	34	34	16	15	23	30	30	17	19
Soltu.DM.01G014860.1	0	0	0	0	0	12	0	0	0	0	0	0	0	0	0	0	0	0	0	0	0	0	0	0	0	0	0	0	0	0
Soltu.DM.03G037220.1	144	86	50	88	110	46	75	189	10	116	122	127	54	115	146	124	76	118	178	104	43	84	117	73	63	65	85	91	84	67
Soltu.DM.01G011620.1	0	0	0	0	0	0	0	0	0	0	0	0	0	0	0	0	0	0	0	0	0	0	0	0	0	0	0	0	0	0
Soltu.DM.03G002070.1	736	317	273	283	282	394	261	541	181	400	226	453	222	258	423	411	421	415	643	136	304	273	340	173	344	189	334	259	385	167
Soltu.DM.04G015760.1	0	0	0	0	0	0	0	0	0	0	0	0	0	0	0	0	0	0	0	0	0	0	0	0	0	0	0	0	0	0
Soltu.DM.10G006570.1	0	0	0	0	0	0	0	0	0	0	0	0	0	0	0	0	0	0	0	0	0	0	0	0	0	0	0	0	0	0
Soltu.DM.12G022780.1	1081	491	559	472	470	589	498	983	677	581	619	631	438	614	744	690	564	627	985	410	490	482	614	456	558	446	689	581	711	414
Soltu.DM.04G014570.1	0	0	0	0	0	0	0	0	0	0	0	0	0	0	0	0	0	0	0	0	0	0	0	0	0	0	0	0	0	0
Soltu.DM.03G016820.1	2331	1007	1116	1003	861	1111	1267	2455	1215	982	1386	1298	1330	1715	1102	1614	1281	1249	1621	964	1135	1105	1192	736	1213	759	1522	1435	1953	813
Soltu.DM.05G016570.1	1790	707	701	499	486	814	512	1155	266	536	623	662	613	692	717	480	775	557	986	401	746	591	571	306	936	503	548	517	1124	428
Soltu.DM.02G004420.1	125	77	47	61	78	60	62	87	19	63	92	71	42	77	105	49	62	62	116	52	64	60	68	61	67	55	39	77	104	34
Soltu.DM.01G051180.1	16785	7493	9219	5991	4577	11994	5073	16848	6464	5238	5361	14026	15251	6577	6436	1443	8174	6718	8923	2289	6370	4725	6613	2453	10617	6989	9629	3177	13016	4542
Soltu.DM.10G026390.1	0	0	0	0	0	0	0	0	0	0	0	0	0	0	0	0	0	0	0	0	0	0	0	0	0	0	0	0	0	0
Soltu.DM.01G051180.2	1231	455	216	294	0	485	133	1676	0	0	51	0	429	385	323	218	333	274	341	0	521	0	0	0	515	108	182	196	602	0
Soltu.DM.01G014010.1	80	64	32	45	53	53	61	68	8	44	54	47	34	70	60	57	39	66	109	38	26	45	71	53	37	42	59	64	45	41
Soltu.DM.06G003460.1	14	3	10	5	5	21	3	16	7	5	14	7	13	20	15	9	10	8	8	4	11	8	12	6	3	2	11	15	10	8
Soltu.DM.08G014210.1	153	21	83	7	8	96	14	79	6	36	18	48	23	15	106	10	120	20	40	18	63	15	29	7	77	12	50	24	142	5
Soltu.DM.01G013030.1	8	2	2	2	4	2	2	6	3	1	5	2	2	4	0	6	0	0	2	0	0	5	6	4	2	2	2	2	3	2
Soltu.DM.07G001860.1	470	200	191	174	195	268	204	631	153	157	261	385	351	233	264	190	237	246	389	165	181	179	249	126	276	226	397	237	376	171
Soltu.DM.04G013880.1	0	0	0	0	0	0	0	0	0	0	0	0	0	0	0	0	0	0	0	0	0	0	0	0	0	0	0	0	0	0
Soltu.DM.03G035040.1	225	108	86	129	80	154	122	231	99	142	183	200	103	242	156	195	89	140	227	136	86	107	100	76	114	95	116	146	163	84
Soltu.DM.08G004840.1	0	0	0	0	4	0	0	0	0	0	7	0	0	0	0	0	0	0	5	0	0	0	0	0	0	0	0	3	0	0
Soltu.DM.06G033840.1	0	0	0	0	0	0	0	0	0	0	0	0	0	0	0	0	0	0	0	0	0	0	0	0	0	0	0	0	0	0
Soltu.DM.12G001470.2	163	0	0	273	65	0	93	60	0	134	190	19	0	188	97	38	210	194	73	0	0	92	52	0	59	28	0	0	201	76
Soltu.DM.04G038010.1	753	919	378	769	829	391	743	774	775	587	1409	595	335	1117	623	778	283	761	887	786	339	699	757	856	337	767	626	1127	456	821
Soltu.DM.12G003810.1	0	0	0	868	7	0	108	0	1183	0	79	1	0	130	0	2882	0	558	0	209	0	411	0	15	0	19	0	393	0	142
Soltu.DM.06G024420.1	25	41	25	27	32	32	32	47	4	34	24	31	25	27	63	20	27	48	51	15	16	22	49	22	24	17	51	26	38	13
Soltu.DM.11G000290.1	149	111	65	92	100	75	74	139	17	108	134	80	74	89	92	93	82	89	140	95	51	81	117	106	46	95	62	101	78	66
Soltu.DM.01G014990.1	0	0	0	0	0	0	0	0	0	0	0	0	0	0	0	0	0	0	0	0	0	0	0	0	0	0	0	0	0	0
Soltu.DM.01G029010.1	0	0	0	0	0	0	0	0	0	0	0	0	0	0	0	0	0	0	0	0	0	0	0	0	0	0	0	0	0	0
Soltu.DM.07G009830.1	0	0	0	0	0	0	0	0	0	0	0	0	0	0	0	0	0	0	0	0	0	0	0	0	0	0	0	0	0	0
Soltu.DM.01G047020.1	1405	383	749	279	290	376	398	1057	498	512	764	737	405	922	834	527	426	439	1217	590	350	399	657	468	400	299	1053	613	578	276
Soltu.DM.04G036340.2	2201	3225	926	1474	1256	755	989	930	364	528	390	312	336	715	555	540	836	2102	431	429	532	1758	280	332	796	1091	214	368	1021	1607
Soltu.DM.04G036340.1	1315	1164	1191	1212	1537	845	1656	730	798	671	727	576	361	350	513	537	775	1353	606	343	678	1485	538	435	1040	1714	508	601	1299	887
Soltu.DM.04G010880.1	506	153	266	99	94	367	91	862	572	186	288	445	555	410	459	142	513	104	765	134	393	102	407	137	525	109	571	153	679	94
Soltu.DM.02G033820.1	940	408	599	571	575	554	636	1376	1778	992	753	846	357	774	733	893	258	827	761	761	225	802	586	682	281	626	813	1194	397	716
Soltu.DM.07G024170.1	4	0	6	0	0	6	6	7	5	7	0	3	0	4	0	6	5	7	5	9	7	5	5	0	4	0	6	0	11	0
Soltu.DM.05G019340.1	0	0	0	0	0	0	0	0	2	0	0	0	0	0	0	0	0	0	0	0	0	0	0	2	0	0	0	0	0	0
Soltu.DM.06G017340.1	4545	1600	2119	1343	1322	2348	1442	4190	363	2179	1468	2308	1871	1437	2210	1395	1711	1680	2323	901	1361	1511	1536	873	1752	1200	1840	1507	2204	1146
Soltu.DM.04G021130.1	253	182	141	119	140	181	120	218	82	182	166	197	117	141	195	132	102	143	199	97	97	88	134	115	148	79	212	132	146	79
Soltu.DM.04G031970.1	0	0	0	0	0	0	0	0	0	0	0	0	0	0	0	0	0	0	0	0	0	0	0	0	0	0	0	0	0	0
Soltu.DM.08G007960.1	0	0	0	0	0	0	0	5	0	0	0	0	0	0	0	0	0	0	0	0	0	0	0	0	0	0	0	0	0	0
Soltu.DM.07G002660.1	2907	753	891	1314	1298	1084	1188	2464	773	1221	209	1410	310	165	982	204	667	1559	391	133	568	1568	151	121	759	1538	335	350	1044	1793
Soltu.DM.05G019350.1	0	0	0	0	0	0	0	0	0	0	0	0	0	0	0	0	0	0	0	0	0	0	0	0	0	0	0	0	0	0
Soltu.DM.01G030300.1	4	6	0	4	8	0	8	0	5	4	5	0	0	8	7	0	0	13	0	6	0	7	2	0	0	0	2	3	0	3
Soltu.DM.04G012990.1	35	123	35	159	202	0	175	51	329	41	217	27	10	162	69	375	69	344	67	153	25	272	47	199	30	174	40	586	37	147
Soltu.DM.01G001980.1	95	14	43	188	24	69	47	87	44	22	47	64	69	70	27	318	18	45	12	8	11	68	11	6	14	14	19	38	52	39
Soltu.DM.05G010700.2	1238	213	45	48	30	790	67	432	114	15	14	92	60	75	176	84	145	141	137	26	94	107	82	30	63	117	70	67	630	63
Soltu.DM.04G020070.1	0	0	0	0	0	0	0	0	0	0	0	0	0	0	0	0	0	0	0	0	0	0	0	0	0	0	0	0	0	0
Soltu.DM.05G010700.4	9	9	7	8	0	48	4	7	0	2	2	7	8	0	4	0	15	6	0	0	2	3	4	3	7	4	13	0	0	0
Soltu.DM.05G010700.5	0	0	0	0	0	0	0	0	0	0	0	0	0	0	0	0	0	0	0	0	0	0	0	0	0	0	0	0	0	0
Soltu.DM.08G007250.1	130	40	58	30	56	68	40	68	19	36	34	53	36	46	58	22	63	54	106	22	67	43	65	27	59	37	72	45	98	29
Soltu.DM.08G024380.1	0	0	0	0	0	0	0	0	0	0	0	0	0	0	0	0	0	0	0	0	0	0	0	0	0	0	0	0	0	0
Soltu.DM.12G012550.1	0	0	0	0	0	0	0	0	0	0	0	0	0	0	0	0	0	0	0	0	0	0	0	0	0	0	0	0	0	0
Soltu.DM.10G008580.1	24	13	10	15	24	8	10	13	4	19	18	9	7	16	7	8	7	22	14	3	2	4	12	0	9	8	18	19	14	8
Soltu.DM.03G005510.1	678	26	224	0	0	71	175	456	3	0	61	0	101	0	516	51	487	0	12	156	491	192	0	0	570	0	284	0	327	0
Soltu.DM.01G004880.4	0	0	0	0	0	0	0	0	0	0	0	0	0	0	0	0	0	0	0	0	0	0	0	0	0	0	0	0	0	0
Soltu.DM.01G004880.5	0	24	3	0	7	6	0	0	0	4	0	0	8	21	10	8	18	0	8	8	10	13	0	0	0	0	10	0	0	4
Soltu.DM.01G004880.2	0	0	0	0	0	0	0	0	0	0	0	0	0	0	0	0	0	0	0	0	0	0	0	0	0	0	0	0	13	0
Soltu.DM.01G004880.3	0	0	0	0	0	0	0	0	0	0	0	0	0	0	0	0	0	0	0	0	0	0	0	0	0	0	0	0	0	0
Soltu.DM.01G004880.1	0	0	0	0	0	0	0	0	0	0	0	0	0	0	0	0	0	0	0	0	0	0	0	0	0	0	0	0	0	0
Soltu.DM.08G021600.1	222	15	103	14	13	118	18	140	21	76	22	114	120	22	134	18	166	18	188	15	89	9	114	10	107	3	160	11	146	8
Soltu.DM.01G000390.1	400	107	216	71	95	221	86	445	39	221	102	272	194	119	201	86	166	107	288	86	120	92	165	68	171	67	232	101	269	61
Soltu.DM.04G034920.1	16929	17847	9471	13326	21975	7764	16027	23897	4402	16775	17368	16116	9617	15228	19998	11310	10115	15028	22181	11060	8196	16357	14797	12088	9681	13912	18422	15817	11800	14235
Soltu.DM.10G027080.1	16	142	0	190	151	14	153	19	172	9	253	17	22	154	41	240	17	159	51	87	11	128	21	108	27	130	48	153	41	127
Soltu.DM.12G029760.1	1153	798	556	641	906	522	808	1520	626	926	1508	1076	621	1211	1104	929	477	863	1352	910	352	747	1107	1001	612	796	1545	1238	756	771
Soltu.DM.03G019890.1	0	6	0	16	9	0	0	0	4	0	0	0	0	0	0	0	0	0	0	0	0	8	0	0	7	10	0	0	0	0
Soltu.DM.04G037090.1	13243	8186	5349	4348	3807	8351	3835	11212	2811	1670	3610	6216	6300	6503	6829	1808	7796	4512	9023	2201	10675	4398	4852	2707	12370	6298	9604	2978	15131	3999
Soltu.DM.09G014290.4	462	152	92	151	128	211	189	340	159	136	136	275	0	187	193	226	240	107	288	343	173	293	181	238	105	98	273	244	226	168
Soltu.DM.02G007390.1	8	3	6	24	5	0	6	19	14	6	19	5	7	5	0	43	0	23	3	5	0	20	0	4	0	3	0	17	0	9
Soltu.DM.09G014290.2	2807	1612	1608	1516	1796	1843	1529	3119	532	1599	1802	2062	1407	1460	2274	1316	1727	1735	3205	742	1514	1300	2269	958	1788	1544	2788	1402	2474	1256
Soltu.DM.03G014100.1	128	2145	97	1724	1369	35	1441	81	809	76	1916	50	16	1028	61	1322	77	2376	70	1239	24	1740	45	1458	41	2249	45	1251	62	2504
Soltu.DM.03G034970.1	114	67	34	178	144	42	168	37	67	86	277	42	36	281	30	289	14	142	23	119	6	145	24	71	20	97	15	280	30	89
Soltu.DM.07G019800.1	418	126	203	143	128	202	136	439	314	228	176	250	117	165	421	144	287	224	492	128	163	136	272	116	236	103	396	181	287	71
Soltu.DM.05G026670.1	0	0	0	0	0	0	0	0	0	2	0	3	0	0	0	0	3	0	3	1	0	0	0	0	0	0	0	0	0	0
Soltu.DM.05G017430.1	0	0	0	0	0	0	0	0	0	0	0	0	0	0	0	0	0	0	0	0	0	0	0	0	0	0	0	0	0	0
Soltu.DM.08G002720.1	483	233	289	225	231	288	193	468	103	273	289	277	156	203	359	238	237	273	348	147	181	203	321	149	262	225	361	247	331	229
Soltu.DM.08G004790.1	10	12	0	19	21	6	19	20	15	5	4	10	0	33	23	49	14	55	16	9	0	39	8	0	0	5	9	19	10	12
Soltu.DM.06G006190.1	0	0	0	0	0	0	0	0	0	0	0	0	0	0	0	0	0	0	0	0	0	0	0	0	0	0	0	0	0	0
Soltu.DM.01G034970.1	0	10	0	12	14	3	16	15	9	0	27	0	6	12	0	12	3	7	0	16	0	7	10	17	0	13	0	27	0	8
Soltu.DM.08G009060.1	2	4	2	1	3	3	3	1	2	3	2	2	4	2	0	2	1	2	2	1	2	1	2	2	2	1	2	4	2	3
Soltu.DM.04G009670.1	5	0	0	0	0	0	0	0	0	0	0	0	0	0	0	0	0	0	0	0	0	0	0	0	0	0	0	0	0	0
Soltu.DM.08G000930.1	145	109	61	78	106	41	96	57	83	50	165	78	61	124	53	99	26	137	93	88	20	108	91	63	29	120	51	116	64	93
Soltu.DM.11G008530.1	45	22	18	16	23	32	25	26	9	16	27	37	12	15	20	13	9	20	25	17	10	15	36	5	19	15	10	14	25	16
Soltu.DM.01G048840.1	26	19	15	25	18	25	16	41	27	31	37	59	13	33	34	30	21	29	45	16	18	16	22	28	13	14	31	20	12	18
Soltu.DM.02G024730.1	190	176	43	333	256	75	401	109	192	48	208	41	21	206	93	367	101	490	65	208	62	446	40	136	42	156	72	401	57	186
Soltu.DM.04G023340.1	344	234	161	169	229	231	192	280	43	135	250	202	163	267	243	132	158	227	336	148	154	174	254	114	190	208	219	205	273	152
Soltu.DM.03G007640.1	0	0	0	0	0	0	0	0	0	0	0	0	0	0	0	0	0	0	0	0	0	0	0	0	0	0	0	0	0	0
Soltu.DM.09G025420.1	137	71	82	105	81	96	86	185	82	98	160	113	98	105	147	113	78	124	161	90	76	140	132	103	113	100	133	158	119	115
Soltu.DM.04G008870.1	0	0	0	0	0	0	0	0	0	0	0	0	0	0	0	0	0	0	0	0	0	0	0	0	0	0	0	0	0	0
Soltu.DM.10G027410.1	3	0	2	0	0	0	0	0	2	0	0	0	0	0	0	0	0	0	0	0	0	0	0	0	0	3	0	0	2	0
Soltu.DM.01G030770.1	35	14	36	14	26	10	22	48	44	63	19	66	24	16	41	18	29	44	46	19	20	23	62	18	24	13	46	12	18	30
Soltu.DM.09G027510.1	0	0	0	0	0	0	0	0	0	4	0	0	0	0	0	0	3	6	0	0	0	3	0	0	0	0	0	0	0	0
Soltu.DM.01G039040.1	0	13	0	33	49	0	18	0	8	0	26	0	0	5	0	36	0	28	0	15	0	14	0	13	0	11	0	14	0	12
Soltu.DM.02G024720.1	694	555	339	432	542	463	850	662	277	433	712	495	436	698	442	460	185	702	606	503	200	639	435	494	242	575	593	620	342	462
Soltu.DM.03G026450.1	0	0	0	0	0	0	0	0	0	0	0	0	0	0	0	0	0	0	0	0	0	0	0	0	0	0	0	0	0	0
Soltu.DM.07G004730.1	2480	1686	1399	1450	2107	1717	1684	3280	282	2135	1555	2299	1676	1331	2643	1107	1846	1557	3417	947	1451	1318	3069	1040	1830	1497	3098	1422	2493	1308
Soltu.DM.10G020310.1	0	0	0	0	0	0	0	0	1	0	0	0	0	0	0	0	0	0	0	0	0	0	0	0	0	0	0	0	0	0
Soltu.DM.01G029960.1	22	0	26	0	0	23	0	29	8	26	4	33	26	12	37	33	21	4	27	5	12	6	22	5	9	0	29	11	17	3
Soltu.DM.06G029530.1	0	0	0	0	0	3	0	4	0	0	0	0	0	0	0	0	0	5	2	0	0	2	0	0	0	2	3	1	0	0
Soltu.DM.12G012790.1	0	0	0	0	0	0	0	0	0	0	0	0	0	0	0	0	0	0	0	0	0	0	0	0	0	0	0	0	0	0
Soltu.DM.05G007520.1	925	691	346	462	559	438	341	754	367	351	663	525	282	401	553	487	517	577	865	492	364	582	462	414	402	416	629	546	472	473
Soltu.DM.05G007520.2	0	0	0	0	0	0	160	0	0	0	0	23	0	198	0	0	0	0	0	0	2	0	0	0	0	0	11	0	0	0
Soltu.DM.01G048370.1	17	0	0	0	0	6	0	8	0	0	0	0	0	4	6	4	12	9	6	0	0	0	5	0	0	0	3	4	13	0
Soltu.DM.05G004840.1	2351	2764	1290	1877	1874	1305	1911	2040	965	909	2077	1556	983	1431	1387	1332	1223	2338	1963	853	1090	1666	1125	965	1413	1704	1265	1314	1562	1500
Soltu.DM.01G031050.1	28	26	27	33	14	31	21	55	161	16	66	40	22	69	36	63	29	51	34	34	17	19	19	30	9	18	39	29	23	22
Soltu.DM.12G020320.1	5	30	2	6	32	7	33	11	41	2	13	3	7	29	37	19	9	41	12	45	8	47	7	106	8	71	5	17	16	19
Soltu.DM.11G001850.1	0	3	0	4	0	0	10	6	0	3	7	16	5	6	4	8	0	4	4	0	0	0	5	8	0	4	0	9	0	0
Soltu.DM.12G020320.2	27	156	0	132	178	3	93	0	66	4	145	0	5	113	42	104	40	138	4	123	33	122	3	54	2	71	6	144	9	123
Soltu.DM.04G026710.1	0	0	0	0	0	0	0	0	0	0	0	0	0	0	0	0	0	0	0	0	0	0	0	0	0	0	0	0	0	0
Soltu.DM.09G027890.1	126	54	101	20	40	136	24	145	21	68	34	105	82	27	99	19	61	56	111	20	51	14	59	7	86	31	81	12	97	24
Soltu.DM.09G009170.1	0	0	0	0	0	0	0	0	0	0	0	0	0	0	0	0	0	0	0	0	0	0	0	0	0	0	0	0	0	0
Soltu.DM.12G015060.2	587	152	288	229	70	746	97	726	0	208	41	673	800	15	285	0	320	201	160	31	214	95	194	21	449	153	274	29	588	73
Soltu.DM.12G015060.3	0	0	0	0	0	0	0	0	0	0	0	0	0	0	0	0	0	0	0	0	0	0	0	0	0	0	0	0	0	0
Soltu.DM.12G015060.1	409	81	203	40	12	428	53	318	30	87	15	301	489	54	144	0	273	61	210	8	122	15	105	10	377	81	202	0	314	42
Soltu.DM.12G001800.1	569	280	227	237	163	249	234	581	407	330	345	208	151	259	318	300	241	499	380	213	240	371	194	229	321	228	366	313	306	247
Soltu.DM.02G020240.2	829	627	118	57	40	128	213	1428	97	15	281	133	202	649	89	481	205	475	661	395	1113	664	112	123	621	218	337	357	1107	103
Soltu.DM.02G020240.1	8029	6481	4390	2329	1360	3865	3582	9716	2073	716	5464	2364	3529	6062	898	2777	1653	2191	5588	3301	7898	3603	2092	2759	13762	4998	5872	5222	22195	2227
Soltu.DM.09G018500.1	4	5	3	2	0	0	2	0	0	0	6	0	0	3	4	0	0	0	0	8	0	0	0	0	2	0	0	4	3	0
Soltu.DM.01G000800.2	318	368	193	305	357	209	324	275	147	208	211	301	160	220	371	183	276	394	399	142	172	318	184	190	318	235	211	258	358	220
Soltu.DM.01G000800.3	0	0	0	0	0	0	28	110	0	0	0	0	0	0	38	0	0	0	0	0	0	77	0	0	0	0	63	0	0	50
Soltu.DM.01G000800.1	224	0	52	0	27	111	30	0	66	6	60	0	51	60	0	76	0	42	0	66	70	0	18	3	26	9	0	86	64	0
Soltu.DM.01G000800.4	39	8	11	25	28	18	41	24	14	14	16	8	24	7	14	18	16	18	20	25	20	23	44	21	4	27	35	32	23	16
Soltu.DM.10G006820.1	0	0	0	0	0	0	0	0	0	0	0	0	0	0	0	0	0	0	0	0	0	0	0	0	0	0	0	0	0	0
Soltu.DM.06G029270.1	2321	1128	1067	831	1062	1106	1007	2649	791	1223	1307	1440	1079	1228	1791	1363	1268	1430	1947	1017	1006	1148	1020	974	1032	798	1506	1390	1411	895
Soltu.DM.12G013450.1	0	0	0	0	0	0	0	0	0	0	0	0	0	0	0	0	0	0	0	0	0	0	0	0	0	0	0	0	0	0
Soltu.DM.09G011620.1	0	0	0	0	0	0	0	0	0	0	0	0	0	0	0	0	0	0	0	0	0	0	0	0	0	0	0	0	0	0
Soltu.DM.10G019490.1	164	88	74	61	66	127	48	140	64	76	88	89	88	60	103	47	66	79	110	44	44	64	109	39	92	54	75	72	93	53
Soltu.DM.02G021370.1	4	1013	0	894	860	0	774	22	13	122	513	22	10	379	0	21	0	1154	0	143	4	811	9	210	0	639	20	52	0	469
Soltu.DM.02G021370.2	16	3	27	0	0	11	0	43	48	0	0	42	11	0	10	66	16	5	24	0	7	11	24	0	22	1	12	128	11	4
Soltu.DM.02G013830.1	750	490	256	692	266	438	396	603	494	294	460	367	332	587	337	957	451	744	521	275	333	468	187	224	438	146	248	487	598	235
Soltu.DM.01G001900.1	661	0	372	298	409	377	371	557	150	293	483	350	232	380	418	330	0	388	641	376	0	305	385	327	275	377	350	415	474	288
Soltu.DM.01G001900.2	0	0	0	0	0	0	0	0	0	0	0	0	0	0	0	0	291	0	0	0	0	0	0	0	0	0	0	0	0	0
Soltu.DM.01G001900.3	7	474	0	0	0	0	0	0	3	6	0	15	38	5	0	11	45	47	0	4	233	58	0	11	5	0	0	0	0	9
Soltu.DM.05G020800.1	2122	1296	1073	1041	1195	1134	1104	1736	868	998	1597	1239	694	1280	1128	1173	871	1467	1656	932	820	1197	1122	1125	928	1188	1287	1498	1262	1005
Soltu.DM.10G028400.1	2707	1855	1276	1631	1876	1143	1865	3349	596	1281	3044	1723	1016	3088	2057	2640	1224	2440	2332	2136	1090	2192	1398	1976	971	1558	2064	3220	1370	1849
Soltu.DM.08G003070.1	56	18	35	135	57	14	47	72	13	64	28	40	25	21	71	43	31	56	103	20	22	48	57	0	44	12	76	24	44	15
Soltu.DM.01G015080.1	0	0	0	0	0	0	0	0	0	0	0	0	0	0	0	0	0	0	0	0	0	0	0	0	0	0	0	0	0	0
Soltu.DM.02G015440.1	229	114	135	80	94	160	109	226	154	108	111	139	132	104	144	79	155	90	167	47	108	114	96	79	140	98	166	119	198	128
Soltu.DM.07G000920.2	1	4	39	1	0	0	2	15	19	0	0	43	0	0	50	0	0	1	2	0	21	9	13	9	0	1	13	0	0	0
Soltu.DM.07G000920.1	3776	1744	1921	1210	1557	2673	1216	3884	963	1967	1279	3199	2775	1307	2365	894	1964	1361	2602	845	1524	1227	1857	871	2391	1549	2442	1211	3132	1301
Soltu.DM.04G022260.1	1016	564	307	372	406	303	358	864	469	323	376	321	271	551	289	561	384	725	608	326	437	523	209	185	278	370	198	453	313	376
Soltu.DM.01G003570.1	143	212	81	119	143	55	147	88	135	76	133	91	32	158	43	152	32	203	21	111	22	178	26	134	37	102	25	163	47	114
Soltu.DM.04G022260.2	557	330	296	392	443	439	433	334	457	366	429	452	239	244	547	306	335	326	317	253	225	430	428	406	401	343	334	519	622	261
Soltu.DM.02G027670.2	0	0	0	0	0	0	0	0	0	0	0	0	0	0	0	0	0	0	0	0	0	0	0	0	0	0	0	0	0	0
Soltu.DM.02G027670.1	1521	1135	697	790	1025	721	866	1847	902	785	1027	1089	746	979	1298	910	850	1139	1761	775	805	1132	997	798	958	848	1165	1025	1089	767
Soltu.DM.11G016000.1	0	0	0	0	0	0	0	0	0	0	0	0	0	0	0	0	0	0	0	0	0	0	0	0	0	0	0	0	0	0
Soltu.DM.11G010600.1	450	23	169	7	7	288	15	484	6	134	22	254	192	24	274	23	379	6	415	16	419	11	176	7	372	3	346	15	465	6
Soltu.DM.03G024660.1	0	0	0	0	0	0	0	0	0	0	1	0	0	0	0	0	0	0	0	0	0	0	0	0	0	0	0	0	2	0
Soltu.DM.04G004170.1	284	148	90	98	164	109	161	203	141	162	238	175	86	150	160	148	108	181	186	106	69	136	93	137	75	86	145	198	114	88
Soltu.DM.11G018540.1	20	15	0	0	0	0	0	0	4	0	37	14	0	0	0	2	0	0	0	0	0	0	0	0	0	0	0	0	0	0
Soltu.DM.01G033630.1	0	0	0	0	0	0	0	0	0	0	0	0	0	0	0	0	0	0	0	0	0	0	0	0	0	0	0	0	0	0
Soltu.DM.04G004170.2	0	0	0	0	0	13	0	0	0	0	0	0	0	0	0	0	0	17	0	0	0	0	0	0	0	0	0	0	0	0
Soltu.DM.12G017920.1	0	0	0	0	0	8	0	0	6	0	4	0	0	0	6	0	0	0	7	0	0	0	0	0	0	0	0	0	0	0
Soltu.DM.11G024900.1	23	1	13	2	2	9	1	10	3	7	5	10	12	8	9	8	3	3	11	6	8	2	14	2	2	3	9	6	9	2
Soltu.DM.11G006300.1	908	393	437	225	302	526	281	931	222	450	323	574	403	324	520	191	507	318	645	216	412	314	392	177	427	300	572	278	607	283
Soltu.DM.04G037010.1	414	184	358	202	230	203	229	380	1164	318	407	271	170	528	339	386	124	201	307	247	76	132	161	270	112	47	253	435	161	57
Soltu.DM.03G026690.1	263	213	126	152	223	152	166	344	105	219	207	269	121	152	304	142	198	151	271	154	95	158	158	165	151	153	197	224	185	145
Soltu.DM.02G027660.1	597	439	318	424	484	350	515	562	509	189	908	499	256	748	382	702	363	603	439	422	231	448	291	475	282	396	476	676	433	407
Soltu.DM.11G021150.1	753	688	393	473	622	402	586	988	507	389	920	607	534	1069	488	853	376	762	533	623	331	621	359	633	323	587	431	801	515	547
Soltu.DM.11G012670.1	0	0	0	0	0	0	0	0	0	0	0	0	0	0	0	0	0	0	0	0	0	0	0	0	0	0	0	0	0	0
Soltu.DM.09G002200.1	0	0	0	0	3	0	0	0	0	0	0	0	0	0	0	0	0	0	0	0	0	0	0	0	0	0	0	3	0	2
Soltu.DM.05G005130.1	420	63	127	4	22	167	0	894	461	572	372	528	314	230	651	157	262	47	1261	79	288	0	554	84	209	0	855	113	314	29
Soltu.DM.07G005130.1	0	2432	0	917	2764	13	3131	3	1017	0	535	0	0	712	0	1455	0	2749	0	1335	0	3052	0	834	0	4462	0	1694	0	2181
Soltu.DM.05G005130.2	2	12	111	16	10	4	39	137	89	39	28	44	34	58	59	6	5	12	214	13	5	33	104	9	20	16	67	21	7	0
Soltu.DM.02G034140.1	2079	1700	1251	1242	1440	1333	1314	2453	1290	984	1775	1227	662	1371	1137	1536	1341	1568	1508	1283	996	1550	1043	1147	769	1010	1429	1504	1001	1101
Soltu.DM.02G034140.3	45	67	0	55	171	94	0	0	0	0	73	0	0	0	104	28	0	0	34	0	0	0	0	0	175	0	0	12	0	0
Soltu.DM.02G034140.2	597	143	27	183	212	0	32	254	126	301	203	363	299	377	270	119	75	309	223	135	100	283	177	75	316	214	41	0	284	228
Soltu.DM.01G019200.2	651	572	365	625	518	285	622	787	173	389	1100	608	326	658	861	798	410	920	752	590	352	686	536	640	333	597	716	1001	488	633
Soltu.DM.02G034140.4	628	374	274	272	215	154	273	327	267	422	307	373	392	427	647	284	244	535	909	126	222	266	379	265	231	521	515	477	518	160
Soltu.DM.01G019200.1	385	318	218	363	375	181	447	522	134	286	620	344	175	451	501	495	268	541	457	420	191	414	275	424	217	375	449	587	313	342
Soltu.DM.02G028430.1	1616	213	695	341	294	876	303	1957	539	752	482	1128	900	536	1234	680	1194	507	1498	243	1022	308	606	163	964	150	953	309	1324	177
Soltu.DM.11G000310.1	0	0	0	41	18	0	22	7	24	0	20	3	4	34	0	107	10	127	10	28	0	61	0	6	8	0	6	48	7	26
Soltu.DM.12G018610.1	0	0	0	0	0	0	0	0	0	0	0	0	0	0	0	0	0	0	0	0	0	0	0	0	0	0	0	0	0	0
Soltu.DM.04G025650.1	65	99	40	31	101	47	57	100	87	30	35	32	20	124	69	101	62	77	96	87	47	70	59	44	35	40	87	86	36	18
Soltu.DM.07G005120.1	0	0	0	0	0	0	0	0	0	0	0	0	0	0	0	0	0	0	0	0	0	0	0	0	0	0	0	0	0	0
Soltu.DM.07G005120.2	0	0	0	0	0	0	0	0	0	0	0	0	0	0	0	0	0	0	0	0	0	0	0	0	0	0	0	0	0	0
Soltu.DM.04G025650.2	0	0	0	33	0	0	53	0	0	0	111	0	0	0	0	0	0	0	0	0	0	0	0	0	0	0	0	0	27	84
Soltu.DM.04G019610.2	280	140	93	146	101	237	112	303	129	109	173	110	140	190	150	185	118	162	185	130	79	152	109	183	106	140	102	172	110	139
Soltu.DM.09G003700.1	0	0	0	2	0	0	2	0	0	0	0	0	0	0	0	0	0	0	0	0	0	0	0	0	0	0	2	0	4	0
Soltu.DM.04G019610.1	559	280	252	225	348	260	278	570	54	288	392	360	168	289	363	329	281	291	461	221	303	258	274	219	359	294	411	463	406	252
Soltu.DM.03G028370.1	0	0	0	0	0	0	0	0	0	0	0	0	0	0	0	0	0	0	0	0	0	0	0	0	0	0	0	0	0	0
Soltu.DM.07G002340.1	11	33	0	32	22	0	5	0	51	0	120	9	0	62	0	37	0	47	0	0	0	0	4	23	36	12	19	50	43	10
Soltu.DM.01G010960.1	111	68	91	68	114	107	90	121	32	104	91	131	79	53	122	50	64	73	140	42	52	54	142	57	58	72	107	77	118	76
Soltu.DM.07G002340.2	38	23	27	4	15	30	47	21	35	17	23	25	9	25	26	17	22	30	53	63	27	55	24	25	0	21	22	18	18	35
Soltu.DM.01G016480.1	0	0	10	0	0	11	0	0	0	0	0	0	0	0	0	0	0	0	0	0	0	0	0	0	0	0	0	0	0	0
Soltu.DM.02G029040.1	1995	1812	1119	1450	1983	1027	1640	2161	1483	1094	2318	1455	918	2038	1578	1491	1025	1963	2391	1569	878	1634	1797	1498	1080	1610	1745	2150	1401	1528
Soltu.DM.10G027490.1	0	4	0	0	0	0	0	0	0	0	4	0	0	2	0	3	5	0	0	2	4	2	0	0	0	0	0	3	7	0
Soltu.DM.09G001460.1	1913	2380	1804	1860	2028	1170	1708	6176	1053	3660	650	1953	719	609	3310	934	1845	4144	1391	1210	1533	3899	1672	1151	1388	3181	1220	1406	2135	3725
Soltu.DM.02G031030.2	2935	1953	1570	1433	2058	1549	1770	3522	2719	2033	1881	2255	1529	1618	2691	1458	1386	1918	3150	1210	1117	1623	2064	1263	1560	1555	1817	1806	2127	1606
Soltu.DM.02G031030.1	320	349	99	177	296	97	118	300	460	233	121	259	106	173	376	139	178	170	585	163	131	155	447	105	158	105	869	83	280	172
Soltu.DM.02G023390.1	643	121	316	118	89	353	138	770	163	499	174	470	432	163	216	119	164	190	260	93	152	111	174	57	178	67	169	105	225	55
Soltu.DM.09G024450.1	0	0	0	0	0	0	0	0	0	0	0	0	0	0	0	0	0	0	0	0	0	0	0	0	0	0	0	0	0	0
Soltu.DM.07G021180.1	0	0	0	0	0	0	0	0	0	0	0	0	0	0	0	0	0	0	0	0	0	0	0	0	0	0	0	0	0	0
Soltu.DM.05G020110.1	0	0	0	0	0	0	0	0	0	0	0	0	0	0	0	0	0	0	0	0	0	0	0	0	0	0	0	0	0	0
Soltu.DM.09G019060.1	0	1	0	0	0	0	0	0	0	0	0	0	0	0	0	0	0	0	0	0	0	0	0	0	0	0	0	0	0	2
Soltu.DM.12G021270.1	1392	775	749	644	808	886	657	1806	681	1212	1177	1633	984	1150	1081	794	607	966	1823	665	524	769	1434	794	624	709	1236	1100	845	613
Soltu.DM.03G013750.1	63	43	32	34	33	33	11	37	10	8	40	28	22	34	28	14	4	26	58	10	17	8	51	37	39	24	28	46	41	34
Soltu.DM.03G013750.2	21	0	4	4	6	3	7	0	8	7	10	5	0	5	12	14	12	7	9	14	18	21	4	14	12	3	8	4	4	3
Soltu.DM.07G009430.2	0	0	0	0	0	0	0	9	4	0	5	0	0	0	11	101	0	121	10	0	23	68	0	0	0	0	0	46	0	30
Soltu.DM.10G003510.1	0	0	0	0	0	0	0	0	0	0	0	0	0	0	2	0	9	0	6	0	0	0	0	0	3	0	0	0	0	0
Soltu.DM.07G009430.1	138	50	65	192	60	86	75	93	108	35	118	37	29	148	48	265	131	175	99	108	54	87	48	62	78	57	41	98	112	49
Soltu.DM.05G008560.1	6683	3090	2753	3050	3414	3153	3554	6303	6861	5599	4482	3675	2329	4483	7252	5120	10627	4221	5973	4797	6604	3018	3961	4914	6696	3409	5105	7541	8250	3417
Soltu.DM.02G026750.2	731	535	372	452	687	534	490	1282	247	930	852	1032	450	649	893	752	348	1126	927	595	310	835	696	684	533	586	821	817	395	529
Soltu.DM.02G026750.1	478	491	278	304	350	192	312	1260	179	529	536	650	219	286	521	450	243	460	631	392	239	621	562	375	169	520	585	574	505	429
Soltu.DM.10G026100.1	539	415	188	284	211	328	300	721	1566	420	211	308	345	403	560	313	405	654	845	353	271	454	536	238	414	343	418	521	457	176
Soltu.DM.05G012740.1	999	379	448	359	274	670	281	655	241	535	320	544	423	269	505	374	546	528	588	221	371	332	400	183	646	276	398	252	755	266
Soltu.DM.01G024590.2	1139	1345	630	933	1212	607	1015	1136	1181	637	1266	828	473	1135	894	983	534	1413	1285	854	513	1193	843	848	677	1109	901	1111	889	898
Soltu.DM.01G024590.1	379	488	209	366	437	241	395	382	405	263	452	264	150	397	367	359	204	507	468	304	176	371	329	333	197	346	437	391	270	286
Soltu.DM.03G009330.1	0	0	0	0	0	0	0	0	0	0	0	0	0	0	0	0	0	0	0	0	0	0	0	0	0	0	0	0	0	0
Soltu.DM.05G027060.1	358	432	254	403	469	254	421	425	140	392	390	311	181	224	337	232	229	273	467	196	126	275	394	244	192	328	475	280	223	308
Soltu.DM.08G009510.1	0	0	0	0	0	0	0	0	0	0	0	0	0	0	0	0	0	0	0	0	0	0	0	0	0	0	0	0	0	0
Soltu.DM.04G018670.3	39	34	13	9	35	10	7	13	11	28	48	26	14	8	52	35	12	29	41	14	17	8	26	22	16	19	12	10	19	21
Soltu.DM.04G018670.2	1473	1086	902	640	739	835	722	1629	286	766	887	1157	859	910	769	624	768	1025	1207	576	616	785	785	538	820	825	953	741	1010	722
Soltu.DM.04G018670.1	68	37	18	24	18	36	45	40	27	30	22	17	15	31	30	21	25	27	12	22	8	54	20	20	29	34	18	45	31	20
Soltu.DM.04G018670.7	381	206	149	61	138	223	233	237	0	40	274	135	162	163	86	0	188	103	205	84	163	205	138	89	183	107	261	119	163	135
Soltu.DM.04G018670.6	21	26	10	13	4	17	11	35	0	12	21	13	3	8	3	8	16	18	24	0	11	21	11	0	9	6	0	6	11	0
Soltu.DM.04G018670.5	33	13	57	33	37	36	19	36	20	38	26	66	25	40	27	32	48	69	64	61	28	19	12	3	12	39	0	31	52	33
Soltu.DM.04G018670.4	281	212	143	157	136	165	86	189	60	164	172	181	119	167	204	121	84	207	206	47	116	121	99	122	139	186	60	123	223	154
Soltu.DM.10G011410.1	0	0	0	0	0	0	0	0	0	0	0	0	0	0	0	0	0	0	0	0	0	0	0	0	0	0	0	0	0	0
Soltu.DM.06G004320.1	0	0	0	0	0	0	0	0	0	0	0	0	0	0	0	0	0	0	0	0	0	0	0	0	0	0	0	0	0	0
Soltu.DM.10G007850.1	0	0	0	0	0	0	0	0	0	0	0	0	0	0	0	0	0	0	0	0	0	0	0	0	0	0	0	0	0	0
Soltu.DM.02G018480.1	1745	642	632	394	461	1195	409	1318	152	768	249	855	760	279	1039	290	752	410	1259	180	729	375	776	165	899	384	670	219	1143	224
Soltu.DM.02G003210.2	0	0	0	0	0	0	0	0	0	0	0	0	0	7	6	0	0	0	0	0	0	0	0	0	0	0	0	0	0	0
Soltu.DM.02G003210.1	69	41	40	98	78	45	69	72	54	49	89	42	33	73	63	126	51	180	63	43	38	115	14	29	90	21	24	75	90	73
Soltu.DM.01G045410.1	37	18	17	16	22	25	13	46	26	28	24	32	0	14	30	0	0	15	26	0	16	8	25	17	18	24	23	18	43	14
Soltu.DM.05G026590.1	687	186	262	221	238	451	208	561	133	261	143	282	192	121	593	322	601	537	852	98	469	311	365	78	433	86	503	210	550	169
Soltu.DM.12G012380.1	660	416	377	378	568	411	447	674	181	400	446	535	351	400	498	349	320	433	534	307	240	386	365	342	357	457	494	464	483	444
Soltu.DM.05G023090.2	1179	476	645	347	425	1029	242	989	0	437	76	531	623	0	929	0	867	235	504	0	806	270	289	0	939	298	403	0	1066	264
Soltu.DM.05G023090.3	0	0	0	1	0	0	0	0	47	0	0	0	0	82	0	64	0	0	0	49	0	0	0	38	0	0	0	71	0	0
Soltu.DM.05G023090.1	132	62	85	30	25	150	65	136	6	89	3	15	181	18	44	0	110	125	103	0	9	10	110	0	127	96	58	0	131	25
Soltu.DM.09G009470.1	20	35	9	30	64	12	11	39	33	23	75	15	7	46	62	18	59	33	48	27	43	30	45	14	62	54	82	14	141	17
Soltu.DM.08G029910.2	565	467	414	732	642	465	585	842	210	552	764	395	379	754	679	395	510	625	899	512	297	676	514	447	352	558	431	596	240	579
Soltu.DM.08G029910.3	42	140	63	35	58	36	25	58	9	16	36	26	6	31	51	66	75	139	15	54	32	36	5	51	12	56	21	38	32	47
Soltu.DM.08G029910.1	1533	1150	680	601	971	518	775	1192	520	554	1424	959	346	1516	607	1429	330	1218	1090	1286	466	1147	768	1117	496	855	984	1406	897	680
Soltu.DM.01G012570.1	39	0	31	0	6	38	11	59	4	18	8	31	33	3	44	0	33	4	35	7	29	0	15	0	18	2	29	0	25	6
Soltu.DM.05G020410.1	318	136	173	114	119	233	130	311	116	185	154	190	173	114	244	87	151	136	267	86	175	99	198	125	170	108	207	139	239	104
Soltu.DM.11G024290.1	47	25	2	45	31	13	59	2	125	59	16	0	9	40	3	62	3	90	0	18	3	78	2	12	2	38	2	80	2	43
Soltu.DM.05G013540.1	441	310	260	240	409	235	286	522	195	366	339	388	258	281	444	261	276	348	546	287	183	253	473	288	245	276	438	348	295	267
Soltu.DM.02G031440.4	74	53	14	29	28	23	35	136	12	47	207	14	19	29	45	29	26	21	155	82	17	75	17	12	23	17	69	185	19	22
Soltu.DM.02G031440.3	1631	1291	908	960	930	774	1194	433	1403	663	499	1126	517	1166	500	1045	605	1343	1024	880	502	1081	925	1150	691	1125	992	710	865	832
Soltu.DM.02G031440.2	135	0	0	0	0	0	0	356	0	338	209	0	0	0	40	0	0	0	66	0	0	0	0	0	0	0	8	142	0	0
Soltu.DM.02G031440.1	36	82	5	180	391	0	3	903	371	301	912	143	107	376	634	337	85	114	376	238	0	205	161	0	7	5	143	620	4	136
Soltu.DM.06G034190.2	0	30	8	39	25	16	40	23	0	0	31	0	0	37	13	36	0	3	31	2	0	21	0	24	0	26	0	0	0	0
Soltu.DM.01G033040.2	15	18	0	0	0	25	0	31	1	2	15	0	18	20	0	16	0	0	15	0	0	0	0	0	0	0	7	75	0	17
Soltu.DM.09G002520.2	0	0	0	0	0	0	0	0	0	0	0	0	0	0	0	0	0	0	0	0	0	0	0	0	0	0	0	0	0	0
Soltu.DM.09G002520.1	11572	6034	5553	4330	5335	6556	4950	7208	2362	5061	4667	4310	3405	4309	6213	3999	6103	5444	6967	2932	5040	4643	5311	3137	5779	4247	5182	4384	7214	3637
Soltu.DM.07G025570.1	17	15	0	11	11	20	10	25	4	23	8	14	11	0	5	8	14	9	17	6	22	15	12	6	10	14	7	13	17	11
Soltu.DM.05G020400.1	1748	765	826	607	642	1294	495	1166	358	546	433	987	782	478	429	219	645	553	500	233	807	460	305	263	1048	715	600	311	1239	553
Soltu.DM.05G020400.2	110	143	111	73	122	15	51	145	43	91	44	82	56	44	104	0	150	68	71	0	0	72	29	0	79	67	70	32	102	84
Soltu.DM.06G027300.2	1186	419	212	124	188	226	20	474	417	142	42	132	128	336	410	273	618	644	340	251	495	424	190	31	151	214	197	191	201	95
Soltu.DM.12G018900.1	0	0	0	0	0	0	0	0	0	0	0	0	0	0	0	0	0	0	0	0	0	0	0	0	0	0	0	0	0	0
Soltu.DM.12G014330.1	0	0	0	0	0	0	0	2	2	0	0	2	0	12	0	0	0	0	0	0	0	0	0	0	0	0	0	0	0	0
Soltu.DM.08G028400.1	0	0	0	0	0	0	0	0	4	0	0	0	0	0	3	0	2	0	5	0	0	0	0	0	0	0	0	0	0	0
Soltu.DM.12G000980.1	11	0	9	0	0	0	0	0	0	0	0	0	2	0	0	0	0	0	0	0	0	0	0	0	0	0	0	0	0	0
Soltu.DM.09G009030.1	0	0	0	0	0	0	0	0	0	0	0	0	0	0	0	0	0	0	0	0	0	0	0	0	0	0	0	0	0	0
Soltu.DM.02G030760.1	3610	1422	1613	1927	1808	2023	1913	4622	613	2013	2474	2726	2429	2469	3688	2611	3376	2543	3412	1382	2310	1839	1545	1339	3181	1369	2901	1982	3704	1706
Soltu.DM.02G030760.2	335	48	0	0	0	68	0	198	0	0	0	0	66	0	203	0	289	123	35	0	0	145	0	0	0	0	0	0	236	0
Soltu.DM.10G019580.2	0	0	0	24	4	0	0	8	42	0	6	0	0	12	5	50	4	19	0	9	0	17	0	0	0	0	0	10	6	0
Soltu.DM.08G005390.1	0	0	0	0	0	0	8	5	4	6	6	3	0	7	4	8	2	8	0	0	6	6	0	3	0	0	0	13	11	0
Soltu.DM.01G049820.3	123	104	15	17	66	68	63	49	33	38	38	78	21	79	69	52	97	69	50	108	96	56	120	47	73	104	104	37	61	68
Soltu.DM.01G049820.2	6	0	0	0	0	0	0	0	0	0	0	6	61	0	0	0	0	6	0	3	0	0	0	5	0	0	0	4	0	0
Soltu.DM.01G049820.1	1141	807	588	789	783	470	645	1598	780	784	948	794	639	847	1349	730	793	1122	1904	574	532	965	982	640	742	719	1031	900	939	611
Soltu.DM.06G023710.1	200	109	104	88	84	95	93	132	34	94	101	109	75	101	93	70	91	107	139	57	81	97	109	63	121	84	104	105	155	86
Soltu.DM.02G008230.1	257	0	50	0	0	263	0	32	5	0	0	45	14	0	35	10	25	0	85	6	10	0	14	14	46	0	12	12	61	0
Soltu.DM.08G009140.1	0	0	0	0	0	0	0	0	3	0	0	0	0	0	0	0	0	0	0	0	0	0	0	0	0	0	0	0	0	0
Soltu.DM.07G019570.1	145	0	183	0	0	102	0	489	1	232	0	69	2	0	3	0	0	0	44	0	1	0	229	2	1	0	124	0	0	0
Soltu.DM.01G049830.1	834	2130	331	1401	1510	498	1534	516	2768	223	1255	304	206	1449	305	1423	363	2376	372	1061	322	2020	232	950	400	1504	338	1315	549	1467
Soltu.DM.10G009620.1	0	0	0	0	0	0	0	0	0	0	0	0	0	0	0	0	0	0	0	0	0	0	0	0	0	0	0	0	0	0
Soltu.DM.01G046550.1	654	385	276	423	414	302	352	590	323	327	415	413	236	357	500	387	369	643	622	278	277	403	352	221	302	304	480	440	472	319
Soltu.DM.03G031220.1	3491	3081	1597	2188	3529	1786	2523	4364	417	2593	3196	2599	1620	2795	3660	1840	1842	2440	5408	1970	1530	2233	3291	1845	1735	2134	3863	2368	2407	1721
Soltu.DM.12G004610.1	3968	2791	1860	2437	2769	2455	2756	2209	3204	1770	2051	1814	1369	1708	1655	2103	1425	2660	1912	1026	1272	1932	1505	1031	1721	1678	1522	2080	1924	1707
Soltu.DM.06G022210.1	250	211	109	86	190	165	151	339	97	258	99	186	98	111	269	112	102	219	202	126	92	184	192	134	95	158	162	148	194	192
Soltu.DM.09G002280.2	69	139	99	72	89	61	70	88	106	85	57	127	91	52	103	88	106	62	110	38	101	49	84	41	18	32	73	37	63	14
Soltu.DM.09G002280.1	1005	416	414	233	373	687	242	1000	0	398	472	694	380	329	747	284	445	408	1000	328	416	307	536	302	523	271	753	379	772	348
Soltu.DM.05G022680.1	0	0	0	0	0	0	0	0	2	0	0	0	0	0	0	0	0	0	0	0	0	0	0	0	0	0	0	0	0	0
Soltu.DM.10G015460.1	312	261	164	148	207	199	168	342	79	174	266	253	182	212	213	192	149	231	416	163	141	185	235	187	204	183	257	219	267	183
Soltu.DM.01G031280.1	42	29	21	17	25	15	16	38	7	11	32	26	22	44	22	16	21	39	34	22	20	20	18	13	15	11	18	36	22	23
Soltu.DM.05G009830.2	627	449	252	201	366	378	329	178	315	197	473	319	269	378	354	275	386	552	874	236	337	310	434	285	297	361	261	378	543	254
Soltu.DM.05G009830.3	897	437	245	377	269	398	290	911	9	473	397	464	359	483	335	247	328	507	970	359	380	257	489	292	264	283	307	360	573	257
Soltu.DM.05G009830.4	95	122	87	82	228	66	169	153	0	109	0	90	13	0	256	103	140	0	111	0	0	134	299	33	332	155	283	68	72	173
Soltu.DM.05G009830.5	726	554	521	363	354	437	261	761	18	523	702	578	450	568	541	197	323	424	466	428	532	461	565	498	314	337	308	542	657	293
Soltu.DM.12G004600.1	2791	1147	1519	874	1105	1677	956	2846	664	1417	1362	1943	1367	1180	1365	979	1249	1077	1570	855	906	1042	1075	962	1318	1039	1570	1292	1817	980
Soltu.DM.05G021170.1	0	0	0	0	0	0	0	0	0	0	0	0	0	0	0	0	0	0	0	0	0	0	0	0	0	0	0	1	0	0
Soltu.DM.09G015420.1	0	0	0	0	0	0	0	0	0	0	0	0	0	0	0	0	0	0	0	0	0	0	0	0	0	0	0	0	0	0
Soltu.DM.02G004180.1	818	493	339	300	358	370	307	858	110	580	367	379	245	422	495	456	415	543	514	347	256	498	244	302	270	284	362	463	379	297
Soltu.DM.05G002100.1	0	0	0	0	0	0	0	0	1	0	0	0	0	0	0	0	0	0	0	0	0	0	0	0	0	0	0	0	0	0
Soltu.DM.02G020010.1	1485	420	594	372	411	815	336	1288	120	388	452	746	620	520	1031	402	484	361	1176	336	392	370	529	262	528	421	947	416	782	364
Soltu.DM.08G020940.1	29	15	19	31	28	14	25	27	10	21	22	31	14	22	18	17	19	20	37	17	10	18	26	12	15	14	24	22	23	9
Soltu.DM.04G025940.1	0	0	0	0	0	0	0	0	0	0	0	0	0	0	0	0	0	0	0	0	0	0	0	0	0	0	0	0	0	0
Soltu.DM.05G007400.1	0	0	4	0	0	0	0	0	0	0	0	0	0	0	0	0	3	4	3	0	0	0	0	0	0	0	0	5	4	4
Soltu.DM.12G001450.1	0	0	0	0	0	0	0	0	0	0	0	0	0	0	0	0	0	0	0	0	0	0	0	0	0	0	0	0	0	0
Soltu.DM.10G029170.1	0	0	0	0	0	3	0	0	4	0	0	0	0	0	0	0	0	0	0	0	0	0	0	0	0	0	0	0	4	0
Soltu.DM.08G012610.1	276	16	122	8	7	145	16	416	105	140	86	208	232	62	206	45	156	6	273	34	127	18	135	54	175	13	191	53	224	15
Soltu.DM.06G018340.1	14	0	9	12	7	0	0	43	0	67	39	19	16	30	40	28	0	16	34	12	0	9	18	10	0	0	25	12	6	0
Soltu.DM.04G015600.1	2	3	0	0	0	0	0	0	0	0	0	0	0	3	0	4	0	2	0	0	0	4	0	0	0	0	0	5	0	1
Soltu.DM.03G008620.1	0	0	0	0	0	0	0	0	0	0	0	0	0	0	0	0	0	0	0	0	0	0	0	0	0	0	0	0	0	0
Soltu.DM.10G000870.4	262	48	297	110	153	218	69	782	150	609	118	383	175	138	417	224	322	177	466	95	138	103	271	0	366	0	600	272	641	31
Soltu.DM.03G011360.1	743	913	376	654	852	381	794	953	440	342	693	449	271	796	563	715	364	1124	489	502	259	944	370	494	279	793	473	645	387	787
Soltu.DM.08G026450.1	38	0	21	0	0	36	2	53	0	6	4	35	52	1	16	2	18	2	24	2	11	0	17	0	21	1	31	6	32	3
Soltu.DM.01G045800.1	952	521	304	360	265	377	277	731	222	435	458	392	167	366	300	346	153	496	363	226	203	473	172	239	185	427	300	322	241	435
Soltu.DM.12G025620.1	87	620	0	517	1664	0	725	0	332	0	82	0	0	91	0	150	33	575	0	84	0	706	0	88	0	492	0	315	109	605
Soltu.DM.10G000870.3	109	14	14	0	0	0	3	178	6	3	19	324	12	0	67	74	0	0	264	0	0	0	0	8	0	7	37	32	59	73
Soltu.DM.01G035000.1	3	0	0	0	0	3	0	0	2	0	0	0	0	0	0	0	0	0	0	0	0	2	0	0	0	0	0	0	0	0
Soltu.DM.06G007410.1	2	0	2	0	2	2	1	0	2	2	0	0	0	0	0	0	2	3	0	0	0	3	0	0	0	0	2	0	0	3
Soltu.DM.04G011660.1	2309	48	1404	43	56	2966	51	4584	25	905	14	2053	1525	15	2742	24	3079	83	2517	6	2722	38	920	22	2593	44	1486	30	3628	43
Soltu.DM.10G026220.2	6818	2651	3464	4282	3922	4207	4130	9332	9184	6712	5790	7202	4633	4259	3237	4478	2307	4387	4305	2449	1642	3223	2965	3332	2858	2931	5332	5193	3686	3508
Soltu.DM.12G003850.1	2412	2176	1250	2177	2393	1452	2101	2311	480	1515	1713	1378	1268	1399	2064	1686	1634	2096	1587	956	1167	2006	1059	1000	1805	1551	1145	1457	2123	1475
Soltu.DM.02G014120.1	149	165	55	113	147	84	133	529	420	94	420	576	145	389	530	190	58	172	768	265	57	100	164	246	85	146	524	239	60	135
Soltu.DM.03G032190.1	197	157	121	103	153	175	137	249	331	121	163	132	106	128	250	136	144	140	271	133	168	126	258	101	163	71	199	176	243	92
Soltu.DM.08G019790.1	578	433	380	292	489	372	349	481	230	295	280	296	229	254	344	210	335	248	432	184	304	229	330	219	310	277	381	324	464	236
Soltu.DM.04G018370.1	15	4	6	9	7	3	4	0	6	6	6	11	3	6	7	3	0	7	12	5	4	2	1	0	11	13	6	5	0	6
Soltu.DM.09G012340.1	0	0	0	0	0	0	0	0	0	0	0	0	0	0	0	0	0	0	0	0	0	0	0	0	0	0	0	0	0	0
Soltu.DM.09G001610.1	858	741	527	859	594	492	653	604	291	404	995	739	389	941	822	764	633	791	696	816	342	821	759	531	360	780	791	528	642	620
Soltu.DM.09G001610.2	497	703	235	148	658	162	284	796	306	338	128	240	205	265	204	206	33	653	740	227	268	367	138	341	262	283	175	705	275	423
Soltu.DM.12G025620.4	0	0	0	0	0	0	0	0	0	0	0	0	0	0	0	0	0	0	0	0	0	0	0	0	0	0	0	0	0	0
Soltu.DM.01G036680.1	258	104	218	133	95	186	134	427	27	159	188	190	124	168	230	214	159	150	248	104	134	138	138	104	145	136	251	169	248	130
Soltu.DM.01G001860.1	0	1300	0	1500	3520	0	2753	0	2403	0	1120	0	0	737	0	1812	0	3903	0	882	0	3035	0	1728	0	2453	0	2671	0	2697
Soltu.DM.10G006000.1	0	0	0	30	0	0	0	0	0	2	0	7	3	1	27	0	0	71	10	0	2	7	5	0	0	0	13	0	0	2
Soltu.DM.01G023700.1	0	0	0	0	0	0	0	0	0	0	0	0	0	0	0	0	0	0	0	0	0	0	0	0	0	0	0	0	0	0
Soltu.DM.02G016420.1	618	296	271	281	154	515	153	548	126	145	103	304	383	139	366	44	632	244	398	45	596	202	188	52	756	306	367	69	855	184
Soltu.DM.01G018370.1	24	22	6	11	11	10	16	33	6	20	12	20	4	19	20	21	19	19	31	17	11	20	24	12	7	10	8	9	0	16
Soltu.DM.01G052100.1	14	10	7	9	13	0	6	0	7	8	0	0	6	11	8	0	0	0	0	6	10	6	15	8	0	6	10	16	17	7
Soltu.DM.01G052100.2	4	3	0	8	5	4	6	5	0	3	7	6	2	5	4	6	7	8	9	4	4	6	2	4	5	2	3	4	4	3
Soltu.DM.12G012930.1	0	0	0	0	0	0	0	0	0	0	0	0	0	0	0	0	0	0	0	0	0	0	0	0	0	0	0	0	0	0
Soltu.DM.08G000030.1	1582	1050	812	940	1080	834	889	1235	852	891	1066	867	575	865	958	1056	645	1220	1022	716	549	1056	740	702	875	900	850	980	1023	843
Soltu.DM.01G045490.1	3	0	0	0	0	0	0	2	9	2	0	0	0	0	0	0	0	0	0	0	0	2	0	3	0	0	0	0	0	0
Soltu.DM.01G001350.1	5103	2359	2518	2238	2921	2998	2812	4106	1070	2069	2745	3104	2189	2146	2998	2109	2292	2678	3928	1719	1765	2297	3168	1867	2295	2284	3801	2749	3375	2533
Soltu.DM.12G023770.1	350	223	190	168	192	144	168	363	397	159	277	209	142	256	148	321	147	276	263	147	109	252	115	188	202	203	194	302	206	152
Soltu.DM.09G016540.1	347	222	176	146	173	230	183	297	130	204	207	204	157	211	223	136	218	197	322	102	158	157	211	151	213	180	220	205	308	150
Soltu.DM.06G025210.1	505	0	390	0	0	223	0	1307	6	426	0	261	225	0	1623	0	695	0	1600	0	377	0	722	0	349	0	1044	0	504	0
Soltu.DM.10G020510.1	734	280	345	236	325	500	307	773	58	392	222	454	292	244	637	299	457	399	599	171	373	269	409	162	438	215	539	334	558	233
Soltu.DM.02G015110.1	2	0	4	23	26	0	17	3	22	2	8	3	2	10	0	24	0	21	0	4	0	19	3	11	5	3	4	18	0	8
Soltu.DM.04G012550.1	0	0	0	0	0	0	0	0	0	0	0	0	0	0	0	0	0	0	0	0	0	0	0	0	0	0	0	0	0	0
Soltu.DM.04G026360.1	587	405	299	396	429	419	438	603	199	402	398	380	311	279	338	366	447	447	605	252	353	470	401	414	482	428	580	458	495	380
Soltu.DM.04G026360.2	0	0	0	0	0	0	1	0	0	0	3	0	1	0	0	0	0	0	0	0	0	0	0	0	0	0	0	0	0	0
Soltu.DM.04G026360.3	294	89	115	0	74	37	0	81	47	0	122	28	29	184	159	73	0	64	58	56	72	0	78	0	0	0	68	56	174	24
Soltu.DM.09G010670.1	0	0	0	0	0	0	0	0	0	0	0	0	0	0	0	0	0	0	0	0	0	0	0	0	0	0	0	0	0	0
Soltu.DM.06G032430.1	0	0	0	0	0	0	0	4	0	3	0	0	0	0	0	0	0	0	0	0	0	0	0	0	0	0	0	0	0	0
Soltu.DM.03G017840.1	12	0	8	0	15	10	0	15	6	0	21	20	0	0	0	0	0	0	15	7	4	0	0	0	6	0	0	0	0	5
Soltu.DM.01G021920.1	641	599	232	474	600	274	540	606	696	313	716	348	180	612	466	647	355	779	766	555	247	731	308	464	278	496	470	689	394	533
Soltu.DM.06G023790.1	23	8	33	6	3	26	10	47	11	118	0	46	22	8	34	17	8	17	67	13	12	17	25	3	22	6	32	0	35	15
Soltu.DM.06G023790.2	11	0	6	0	0	1	0	18	0	7	0	0	0	8	1	2	0	1	15	0	0	0	1	6	0	1	12	20	0	0
Soltu.DM.05G019820.1	6	0	4	5	5	0	0	17	7	19	0	14	10	17	13	11	10	5	26	0	0	0	14	0	0	0	24	0	7	0
Soltu.DM.01G000090.1	256	201	129	167	207	148	195	227	136	164	363	155	111	308	207	250	120	232	296	211	131	222	136	219	106	180	249	260	156	193
Soltu.DM.10G017020.1	0	0	0	0	0	0	0	0	7	0	0	0	0	0	0	0	0	0	0	0	0	0	0	0	0	0	0	0	0	0
Soltu.DM.04G029820.1	6944	7937	3945	4781	5634	2460	5135	9182	2438	6695	11006	7855	3509	10140	6540	6872	3051	5884	10260	7575	2386	6212	7305	7844	3115	5854	7017	9406	3684	5227
Soltu.DM.05G023240.3	2653	1289	1351	1077	1111	1380	1158	2716	394	1797	1774	2207	1187	1702	1923	1337	1218	1435	2413	1211	1070	1367	1593	1169	1253	1045	1491	1649	1629	1062
Soltu.DM.05G023240.2	0	0	0	0	0	0	0	0	0	0	0	0	0	0	0	0	0	0	0	0	0	0	0	0	0	0	0	0	0	0
Soltu.DM.05G023240.1	0	36	0	1	39	0	0	72	3	0	50	0	21	0	0	0	0	0	68	0	0	0	19	34	0	0	221	0	50	0
Soltu.DM.04G028170.2	90	72	0	49	0	139	0	128	0	115	0	0	58	138	145	44	106	0	137	0	62	0	107	0	40	51	76	0	95	0
Soltu.DM.04G028170.1	662	285	336	229	260	331	285	485	164	155	316	438	258	193	227	210	234	342	487	227	261	232	278	211	301	245	338	321	295	219
Soltu.DM.10G001330.1	13	12	3	6	6	4	0	9	0	13	0	0	5	7	3	0	6	0	9	5	0	8	6	0	3	7	0	0	6	0
Soltu.DM.06G011320.1	0	0	0	0	0	0	0	0	0	0	0	0	0	0	0	0	0	0	0	0	0	0	0	0	0	0	0	0	0	0
Soltu.DM.06G015950.1	0	0	4	38	10	0	30	49	59	0	102	0	0	70	23	122	17	89	32	23	12	18	8	8	6	3	5	11	10	19
Soltu.DM.04G001110.1	2154	862	1161	609	531	1227	816	2775	1053	1773	1987	2181	1152	1714	2193	1426	1083	1120	4624	1352	1120	1029	3778	1511	1029	689	3707	1579	1290	677
Soltu.DM.05G023250.1	729	333	411	336	498	448	352	1015	638	440	429	538	297	377	588	277	440	457	752	240	356	358	526	279	381	354	623	447	536	301
Soltu.DM.09G013900.1	20	22	6	0	12	5	14	13	2	7	11	7	6	19	17	11	6	7	14	8	7	10	9	6	5	10	5	8	8	2
Soltu.DM.06G020000.1	2261	1496	1091	1100	1349	1031	1125	2249	1185	1631	1763	1665	885	1558	1557	1218	1146	1595	2041	1129	926	1310	1506	1080	1074	1172	1563	1551	1374	1103
Soltu.DM.12G014770.2	118	85	58	80	85	75	81	327	41	77	240	78	48	69	247	75	86	224	110	59	67	213	105	83	40	70	204	85	58	75
Soltu.DM.01G032770.1	0	0	0	0	0	0	0	0	0	0	0	0	0	0	0	0	0	0	0	0	0	0	0	0	0	0	0	0	0	0
Soltu.DM.08G025020.1	72	75	32	56	72	18	98	39	47	27	79	41	18	58	22	71	21	92	45	63	21	92	26	47	26	44	23	80	16	43
Soltu.DM.09G002750.1	1641	830	669	673	649	847	553	1569	351	1404	662	929	533	870	735	775	707	566	1036	673	473	623	688	585	625	501	835	677	675	494
Soltu.DM.02G010650.1	424	249	218	184	243	202	179	416	152	161	241	238	184	253	251	191	227	245	374	133	211	220	216	148	235	205	263	254	252	181
Soltu.DM.10G002630.1	0	0	0	0	0	0	0	0	0	0	0	0	0	0	0	0	0	0	0	0	0	0	0	0	0	0	0	0	0	0
Soltu.DM.10G011640.1	0	0	0	0	0	0	0	0	3	0	0	0	0	0	0	0	0	0	0	0	0	0	0	0	0	0	0	0	0	0
Soltu.DM.05G005830.1	6	4	2	0	4	0	5	4	6	3	7	0	0	4	2	9	0	0	0	2	5	6	4	4	0	7	0	11	2	0
Soltu.DM.05G022180.1	6	12	7	6	2	5	1	6	2	2	3	4	4	4	4	1	6	2	3	4	4	3	1	2	6	2	3	3	2	3
Soltu.DM.09G021140.1	22	4	7	44	6	8	20	14	38	0	16	6	9	8	3	54	15	16	5	8	9	28	3	0	20	0	4	19	18	6
Soltu.DM.11G010130.1	0	4	0	8	3	0	3	0	5	0	2	0	0	10	0	10	0	9	0	7	0	15	3	5	0	8	0	11	0	6
Soltu.DM.12G018680.1	216	165	20	30	28	40	15	163	6	79	100	91	51	125	21	5	13	0	25	10	4	4	17	14	9	0	21	18	6	14
Soltu.DM.01G032080.1	0	8	7	9	0	0	10	0	5	0	16	4	0	24	0	28	0	21	0	10	2	5	0	9	0	6	0	3	0	16
Soltu.DM.04G005570.1	234	134	116	106	80	151	75	162	5	80	104	184	173	94	133	24	133	99	221	31	153	89	131	47	190	154	162	54	209	83
Soltu.DM.11G020700.2	294	207	90	45	90	173	170	173	115	102	86	138	108	285	111	5	162	231	227	76	14	267	121	151	189	169	267	50	112	111
Soltu.DM.11G020700.1	1242	543	678	599	843	631	581	1203	225	827	588	711	539	289	924	638	550	660	799	428	473	636	638	328	552	500	630	664	848	529
Soltu.DM.03G034770.1	6	0	0	5	0	7	0	0	17	3	11	0	2	12	3	23	0	18	7	8	0	7	0	14	7	0	4	11	0	0
Soltu.DM.03G000460.1	201	140	112	130	124	123	135	182	44	141	228	163	69	148	136	130	90	170	201	108	90	151	181	146	122	171	103	168	163	124
Soltu.DM.12G029310.1	53	77	29	100	112	42	112	120	87	57	288	69	51	275	252	164	75	163	202	107	70	144	88	108	59	129	110	173	59	61
Soltu.DM.10G023970.1	44	0	6	5	21	0	0	32	0	14	0	7	0	0	6	0	4	0	13	6	0	3	8	0	8	8	19	0	12	4
Soltu.DM.04G011340.1	164	77	43	46	78	61	38	94	32	83	75	110	91	65	116	56	78	84	182	42	82	54	81	33	67	44	64	56	115	31
Soltu.DM.02G015030.2	0	0	3	0	3	0	0	0	2	0	2	0	0	0	0	2	0	0	0	0	3	5	3	0	0	6	0	0	5	0
Soltu.DM.06G005600.2	0	0	0	0	0	0	0	0	0	0	13	0	0	0	0	0	0	0	0	0	0	0	0	0	0	0	0	0	0	0
Soltu.DM.09G012790.1	181	60	56	49	50	116	58	136	208	78	77	96	91	92	102	57	119	61	172	40	96	56	115	65	78	42	115	79	88	43
Soltu.DM.01G009600.1	0	0	0	0	0	0	0	0	0	0	0	0	0	0	0	0	0	0	0	0	0	0	0	0	0	0	0	0	0	0
Soltu.DM.12G017200.1	0	0	0	0	4	0	10	0	0	0	0	0	0	0	0	0	0	0	0	0	0	0	0	0	0	0	0	0	0	0
Soltu.DM.11G014200.1	0	0	0	0	0	0	0	3	0	0	0	0	0	0	0	4	3	0	6	0	0	0	0	0	0	0	0	0	0	5
Soltu.DM.05G013790.1	0	0	0	0	0	0	0	0	0	0	0	0	0	0	0	0	0	0	0	0	0	0	0	0	0	0	0	0	0	0
Soltu.DM.S001100.1	114	0	4	0	0	1	0	10	1	16	0	0	0	0	1	0	0	0	3	0	0	0	420	0	0	0	449	2	0	0
Soltu.DM.03G016300.1	0	0	0	0	0	0	0	0	0	0	0	0	0	0	0	0	0	0	0	0	0	0	0	0	0	0	0	0	0	0
Soltu.DM.10G029470.1	23	44	10	50	48	13	53	19	14	9	74	16	9	47	14	73	11	72	21	39	0	60	13	54	0	37	24	60	6	36
Soltu.DM.05G011720.1	5	392	0	3515	2439	0	2414	3	3289	0	1302	6	0	1022	0	2121	0	2502	0	716	0	1820	0	450	0	562	0	1861	0	977
Soltu.DM.05G018890.1	5	0	0	17	0	0	10	24	44	10	18	9	0	35	12	48	4	46	16	44	7	15	0	15	0	3	4	49	10	14
Soltu.DM.04G028360.1	0	0	0	0	0	0	0	0	0	0	0	0	0	0	0	0	0	0	0	0	0	0	0	0	0	0	0	0	0	0
Soltu.DM.11G021530.2	88	68	18	0	22	0	0	169	60	0	0	52	1	0	5	0	42	60	45	0	2	85	30	5	40	50	45	1	65	2
Soltu.DM.12G020810.1	333	293	193	203	325	191	244	353	280	215	311	243	117	279	250	264	110	305	298	226	112	241	240	229	171	237	244	327	205	209
Soltu.DM.10G005030.1	4	0	0	0	4	0	12	47	13	72	24	8	0	6	57	18	16	0	57	8	0	0	49	7	0	0	33	12	0	0
Soltu.DM.11G002710.2	9	16	9	11	44	0	0	0	90	0	4	0	9	21	8	0	0	45	18	0	0	53	11	0	0	18	18	75	0	0
Soltu.DM.11G021530.3	23	10	12	10	8	0	0	0	4	3	2	7	0	0	8	0	16	11	0	0	0	5	3	0	38	25	0	3	25	0
Soltu.DM.08G006990.1	73	48	27	69	40	40	72	75	50	68	79	79	23	63	21	28	8	241	118	49	4	192	256	60	8	68	154	86	23	98
Soltu.DM.08G012730.1	31	25	0	0	32	34	32	0	0	0	22	0	0	18	0	10	14	0	22	0	0	14	16	0	28	48	25	0	48	19
Soltu.DM.05G001680.1	25	3	12	30	21	25	21	15	8	6	11	5	15	13	7	13	18	18	10	7	15	5	16	13	23	10	28	35	28	7
Soltu.DM.02G005990.1	0	0	0	0	0	0	0	0	0	0	0	0	0	0	0	0	0	0	0	0	0	0	0	0	0	0	0	0	0	0
Soltu.DM.09G019870.1	95	0	63	54	97	76	36	228	101	106	28	30	66	156	209	86	78	166	82	76	53	107	130	26	39	69	65	77	62	168
Soltu.DM.09G019870.3	91	59	21	40	116	57	120	86	48	50	101	48	57	102	88	89	50	97	102	87	25	58	57	56	43	40	66	77	48	33
Soltu.DM.09G019870.2	506	416	352	303	458	224	416	466	192	470	348	328	286	251	404	188	191	318	408	154	173	292	445	238	290	387	368	288	385	354
Soltu.DM.09G019870.5	1929	1438	684	867	1079	678	901	2134	404	1104	1507	1049	585	1536	1383	1213	945	1300	1963	1107	779	1204	1230	823	710	976	1164	1123	1001	991
Soltu.DM.09G019870.4	773	416	590	534	893	493	685	939	263	781	576	1067	462	362	578	229	284	396	604	237	212	480	796	467	419	575	746	469	605	424
Soltu.DM.06G034740.2	68	55	51	46	55	40	61	41	14	46	20	28	20	16	38	9	41	62	50	10	30	38	39	20	34	45	32	12	46	41
Soltu.DM.06G034740.1	15	24	10	14	34	14	16	20	3	19	10	9	8	3	6	4	21	28	14	8	6	18	17	8	11	25	2	20	19	17
Soltu.DM.05G008990.1	33	189	51	169	97	24	101	35	9	45	31	0	59	79	49	22	60	145	42	16	30	184	35	18	81	180	38	27	71	93
Soltu.DM.05G008990.2	27	131	0	55	79	26	42	12	0	0	48	21	0	33	16	7	17	71	7	6	15	34	0	5	0	109	19	0	0	69
Soltu.DM.08G011600.1	0	0	0	0	4	0	0	0	0	0	0	0	0	0	0	0	0	0	0	0	0	0	0	0	0	0	0	0	0	0
Soltu.DM.10G000170.1	91	70	67	66	88	43	66	95	18	73	83	74	50	50	101	47	46	68	66	35	27	56	43	30	71	35	89	78	69	81
Soltu.DM.05G025100.4	246	0	0	52	0	31	110	381	0	140	70	143	155	0	147	70	0	52	186	49	117	111	179	66	194	0	19	65	85	157
Soltu.DM.05G025100.2	247	90	73	20	205	100	96	156	39	98	123	245	48	30	275	160	43	57	363	84	196	99	27	95	91	92	41	189	214	61
Soltu.DM.05G025100.3	0	0	0	0	0	0	0	0	0	0	0	0	0	0	0	0	0	0	0	0	0	0	0	0	0	0	0	0	0	0
Soltu.DM.05G025100.1	3351	1261	2180	1054	954	2245	798	4246	475	2464	1143	2204	1525	1150	2365	597	2097	1299	2914	625	1874	1046	2869	594	2205	1148	2852	926	2958	858
Soltu.DM.12G025650.2	0	0	0	0	0	0	0	0	0	0	0	0	0	0	0	0	0	0	0	0	0	0	0	0	0	0	0	0	0	0
Soltu.DM.02G002220.1	312	241	216	145	207	185	163	156	125	150	173	192	144	130	240	100	209	163	369	118	187	159	291	121	149	127	210	179	209	141
Soltu.DM.11G025310.1	890	492	444	515	661	673	539	859	948	471	512	605	508	422	675	639	548	679	742	352	379	500	350	337	572	426	585	517	776	458
Soltu.DM.05G022740.1	0	0	3	0	8	0	55	0	4	0	0	0	0	0	0	9	0	157	24	11	0	0	0	0	0	0	4	22	0	18
Soltu.DM.04G029300.2	1097	612	479	1069	628	518	771	936	827	545	884	665	418	789	769	1248	777	1263	997	446	543	718	450	317	717	467	837	699	868	521
Soltu.DM.04G029300.1	108	3	3	13	23	3	13	0	0	4	0	9	2	0	0	0	5	0	0	0	0	2	6	0	0	5	0	0	27	0
Soltu.DM.05G022740.2	892	843	467	761	1163	452	753	1560	479	670	1517	1000	632	1221	746	891	364	764	863	816	343	895	637	833	517	881	977	1215	630	813
Soltu.DM.01G017740.1	0	0	0	0	0	0	0	0	0	0	0	0	0	0	0	0	0	0	0	0	0	0	0	0	0	0	0	0	0	0
Soltu.DM.08G007650.1	0	0	0	0	0	0	0	0	0	0	0	0	0	0	0	0	0	0	0	0	0	0	0	0	0	0	0	0	0	0
Soltu.DM.11G008520.1	1720	772	841	621	670	1045	654	1655	567	872	698	1118	762	595	986	648	806	858	1149	490	670	669	706	446	840	565	875	667	1205	501
Soltu.DM.S000490.1	0	0	0	0	0	0	0	0	0	0	0	0	0	0	0	0	0	0	0	0	0	0	0	0	0	0	0	0	0	0
Soltu.DM.04G015320.1	0	0	0	0	0	0	0	0	0	0	0	0	0	0	0	0	0	0	0	0	0	0	0	0	0	0	0	0	0	0
Soltu.DM.07G016240.1	25	21	12	13	48	31	48	50	34	2	32	53	31	64	26	25	41	50	14	0	65	117	23	2	18	30	6	31	46	25
Soltu.DM.07G016240.2	264	147	150	157	142	128	93	215	216	148	145	113	108	158	159	188	89	114	269	123	88	25	155	127	116	127	205	140	146	116
Soltu.DM.11G025900.3	0	3	0	4	44	34	0	90	30	0	3	0	0	28	68	47	0	0	0	10	0	35	0	3	0	4	0	0	0	5
Soltu.DM.11G025900.2	139	4	39	0	35	30	36	42	71	72	0	63	64	0	56	10	22	0	145	0	22	19	77	0	6	0	7	29	71	0
Soltu.DM.11G025900.1	58	40	40	48	0	44	28	60	4	89	66	59	36	0	35	0	60	67	82	21	52	10	75	32	94	27	178	22	43	25
Soltu.DM.11G019490.2	24	8	6	10	18	21	0	33	16	16	39	7	0	0	27	0	7	5	7	9	11	5	50	36	9	10	13	4	1	6
Soltu.DM.11G019490.3	0	6	0	0	13	0	8	0	0	0	0	0	8	9	22	13	0	0	0	13	13	0	0	18	9	0	15	11	0	8
Soltu.DM.11G019490.1	445	244	183	213	270	176	212	407	209	199	286	254	139	333	237	249	236	291	394	250	188	233	187	147	190	187	265	263	305	192
Soltu.DM.11G022080.3	86	159	53	0	87	0	0	81	79	0	139	113	55	61	0	42	0	0	197	0	93	0	84	0	0	118	123	34	0	129
Soltu.DM.11G022080.2	1846	1372	777	560	772	886	481	1095	328	597	901	733	807	1132	1213	972	916	1117	1792	777	606	1137	646	711	1151	881	968	809	1117	600
Soltu.DM.11G022080.1	567	246	507	458	545	536	634	860	127	475	578	277	361	417	609	229	499	395	343	469	358	457	720	565	236	290	470	590	639	318
Soltu.DM.11G009070.1	15	1386	61	548	757	48	678	15	51	2	170	4	25	132	8	37	30	398	19	32	19	497	7	20	36	696	12	20	56	623
Soltu.DM.08G027210.1	13	62	6	71	99	0	87	0	105	0	30	0	0	31	0	55	0	84	0	49	0	76	0	29	0	52	0	62	0	35
Soltu.DM.11G022080.4	443	240	397	696	632	402	551	703	262	501	572	833	348	294	155	372	240	423	710	194	455	124	513	387	416	617	985	638	656	534
Soltu.DM.03G003330.1	501	333	212	211	310	196	251	524	50	286	350	362	208	286	504	263	295	327	580	327	214	271	398	247	240	221	401	330	263	219
Soltu.DM.08G013270.1	0	0	0	0	0	0	0	0	0	0	0	0	0	0	0	0	0	0	0	0	0	0	0	0	0	0	0	0	0	0
Soltu.DM.03G036160.1	0	0	3	15	5	0	14	13	24	0	0	0	0	15	0	20	0	9	0	0	0	23	0	9	0	6	0	16	0	0
Soltu.DM.03G035320.1	797	131	420	107	76	229	154	1155	86	684	293	819	319	265	1066	94	460	148	1520	188	382	60	957	238	345	66	1107	217	489	33
Soltu.DM.02G014830.2	0	0	0	0	0	0	0	0	0	0	0	0	0	0	0	0	0	0	0	0	0	0	0	0	0	0	0	0	0	0
Soltu.DM.02G014830.1	3	0	0	0	16	0	0	0	0	0	0	0	0	0	0	0	0	0	0	0	0	0	0	0	0	0	0	13	0	0
Soltu.DM.01G038780.1	1	0	0	0	0	4	0	0	0	0	0	0	0	0	0	0	0	0	0	0	2	0	0	0	0	0	0	0	0	0
Soltu.DM.05G010460.1	4043	2438	1703	1816	1843	1924	1624	4221	1865	2031	2864	2494	1597	2834	2804	2204	1849	2921	4310	2175	1859	2547	2693	2086	1733	2239	2304	2794	2246	1635
Soltu.DM.01G034570.4	10	25	3	12	20	9	31	22	6	4	43	9	12	40	17	28	15	52	14	59	6	49	49	38	15	48	15	30	5	15
Soltu.DM.07G006660.1	1634	1356	1085	930	979	1296	1026	1943	452	1032	1239	1549	1107	979	708	512	700	1045	956	543	612	842	742	689	989	1115	1173	808	1352	973
Soltu.DM.01G034570.1	1155	1708	730	1003	1504	487	1418	1122	574	1178	2271	953	713	1958	985	1474	512	1917	1217	1756	425	1682	1077	1268	648	1066	896	2023	784	1403
Soltu.DM.01G034570.3	0	0	0	0	0	0	0	0	0	0	0	0	0	0	0	0	0	0	0	0	0	0	0	0	0	0	0	0	0	0
Soltu.DM.01G034570.2	264	6	0	176	143	0	109	219	0	197	202	0	0	183	30	253	90	226	159	227	45	197	0	547	0	279	47	338	73	0
Soltu.DM.01G025150.1	2330	952	1165	648	643	1357	708	2932	1031	1302	1018	1719	1306	881	1358	530	1001	862	1554	469	898	718	1154	567	1105	752	1503	843	1477	662
Soltu.DM.01G040460.1	38	19	17	24	19	29	22	35	18	22	19	12	14	21	59	27	40	33	43	15	31	23	15	14	35	22	43	31	67	23
Soltu.DM.02G014560.1	0	3	0	75	12	5	28	7	50	7	26	0	0	47	0	81	0	31	0	26	0	29	5	11	0	0	0	26	0	19
Soltu.DM.04G010250.2	251	0	92	153	0	0	875	0	0	118	0	220	85	0	89	243	166	0	180	0	116	0	117	0	120	0	129	0	169	0
Soltu.DM.06G020320.1	20	3	6	1	13	0	0	1	0	9	0	4	16	0	0	0	0	0	0	0	0	0	0	0	1	0	0	0	1	0
Soltu.DM.06G020320.2	446	218	212	179	203	302	193	349	34	164	188	304	264	190	200	94	181	175	438	125	228	221	278	140	242	191	194	134	262	155
Soltu.DM.12G014230.1	0	0	0	0	0	0	0	0	0	0	0	0	0	0	0	0	0	0	0	4	0	0	0	0	0	0	0	0	0	0
Soltu.DM.03G013900.1	413	325	205	291	370	256	330	366	66	257	340	325	161	288	263	223	204	352	384	221	167	200	329	240	196	245	379	281	240	261
Soltu.DM.09G024150.1	994	392	298	287	246	436	292	1205	82	630	157	369	273	152	608	320	306	514	615	149	223	460	286	106	259	197	502	318	254	181
Soltu.DM.08G016120.1	0	0	1	0	0	1	0	0	2	0	0	0	0	0	1	0	1	1	0	0	0	2	0	0	0	0	1	0	0	0
Soltu.DM.08G016120.2	0	0	6	0	4	6	4	9	3	2	5	4	0	5	8	0	2	5	2	2	0	0	4	3	4	5	6	7	3	0
Soltu.DM.10G002560.1	683	480	288	328	400	315	307	785	98	302	428	378	275	411	588	414	458	508	881	310	435	446	499	293	389	316	456	381	508	326
Soltu.DM.12G000790.1	122	7	43	14	18	70	9	125	11	48	15	50	24	17	30	16	29	27	39	15	20	21	33	7	15	24	42	17	30	16
Soltu.DM.08G004920.1	263	236	137	292	265	84	241	439	359	229	549	320	116	499	278	390	110	369	337	308	72	302	215	362	78	262	398	481	144	263
Soltu.DM.06G025740.1	62	104	41	67	131	69	83	73	6	53	121	45	38	83	49	87	27	93	80	80	47	95	61	51	29	73	58	91	33	58
Soltu.DM.06G013370.1	34	28	20	31	33	11	27	45	11	38	32	30	11	32	28	15	16	27	30	18	0	16	13	16	16	17	20	21	27	20
Soltu.DM.12G019770.1	137	526	80	326	381	111	352	159	282	120	534	128	81	558	114	723	90	483	227	387	79	408	155	404	111	326	208	604	102	246
Soltu.DM.01G005730.1	0	0	0	0	0	0	0	0	0	0	0	0	0	0	0	0	0	0	0	0	0	0	0	0	0	0	0	0	0	0
Soltu.DM.12G007150.1	12477	10357	6860	5814	4854	4717	5227	12520	986	6568	6352	8107	6101	7327	7476	5322	4349	5642	11636	5464	4293	5524	9629	5151	4670	4536	5891	6885	6786	3761
Soltu.DM.02G006610.1	0	0	0	0	0	0	0	0	0	0	0	0	0	0	0	0	0	0	0	0	0	0	0	0	0	0	0	0	0	0
Soltu.DM.01G004170.1	12	0	5	0	1	4	0	9	0	7	0	5	5	1	5	2	8	1	3	0	3	0	4	3	1	0	10	2	7	2
Soltu.DM.03G016380.1	46	0	29	0	0	23	0	20	0	21	0	26	0	0	18	0	29	0	39	0	15	0	17	0	8	0	13	0	15	0
Soltu.DM.11G024170.1	77	37	29	47	48	42	55	34	41	21	43	29	18	40	15	41	10	72	20	58	11	51	20	23	19	42	14	82	8	33
Soltu.DM.01G024690.1	196	100	123	114	66	160	85	344	84	242	116	115	94	237	415	227	200	128	440	148	245	126	287	113	160	54	297	135	306	57
Soltu.DM.10G007200.1	1454	569	692	211	240	633	203	2163	1330	601	968	1076	369	551	1296	817	738	333	1077	864	684	244	705	705	651	267	682	743	669	418
Soltu.DM.09G022590.1	634	782	407	422	408	437	497	772	496	408	795	399	270	795	344	482	240	659	542	453	235	577	327	436	191	531	403	555	361	540
Soltu.DM.04G016110.1	4440	1935	2340	1649	2099	2738	1774	4305	493	2017	2159	2931	1957	1923	3002	1739	2569	2294	3778	1270	2309	2038	2607	1432	2595	1837	3302	1954	3933	1653
Soltu.DM.01G037330.1	5114	2279	2703	1968	2326	3680	2181	5235	1298	2465	1794	3003	2278	1510	3847	1804	3165	2633	4170	1025	2344	1922	3148	1279	3214	2080	4177	1974	4181	1862
Soltu.DM.12G009170.1	591	228	228	165	120	346	137	498	179	162	196	373	309	174	181	114	195	208	210	109	170	157	103	74	311	254	204	119	288	139
Soltu.DM.01G028830.1	2831	897	1230	612	442	2400	564	1514	59	523	343	1108	1431	380	936	153	1258	544	828	185	1018	430	600	136	1683	603	686	190	2037	426
Soltu.DM.01G012370.1	6	4	6	4	7	4	6	9	3	0	9	7	4	7	6	0	4	0	7	0	0	6	12	3	0	0	0	8	4	3
Soltu.DM.01G028830.2	142	0	11	0	3	145	47	4	5	0	0	3	57	0	0	0	0	48	6	7	60	0	0	0	0	0	3	4	8	5
Soltu.DM.09G028840.1	1387	584	687	513	601	739	548	1700	264	642	865	956	634	909	1999	682	1002	841	2950	636	802	718	1405	611	865	547	1762	798	1379	473
Soltu.DM.11G013070.2	112	69	61	27	0	98	36	188	0	15	31	138	116	31	129	0	37	24	77	3	0	0	0	0	34	43	100	0	0	26
Soltu.DM.03G000810.2	0	0	0	97	63	0	146	343	655	85	69	92	100	0	93	0	56	98	0	0	118	0	0	147	0	0	809	0	64	0
Soltu.DM.03G000810.1	4861	2544	2643	2010	2397	2490	2050	3577	5319	2652	2789	2455	1722	2134	2597	1858	2155	2638	4082	1704	2045	2474	3462	1591	2324	2497	2146	2483	3050	2264
Soltu.DM.11G013070.1	25	1	3	15	51	14	0	10	28	41	8	19	11	3	10	8	11	9	7	13	33	20	92	17	3	0	23	17	82	3
Soltu.DM.06G032620.1	0	4	0	47	34	0	36	0	8	0	18	0	0	10	0	34	0	105	0	8	0	38	0	4	0	5	0	51	0	25
Soltu.DM.07G006290.2	308	192	180	144	246	202	105	445	0	354	202	276	226	128	467	120	298	153	329	104	139	141	312	166	230	73	302	221	211	255
Soltu.DM.07G006290.1	1058	540	556	331	518	559	499	987	362	655	427	627	456	382	718	449	517	580	779	304	392	423	742	188	417	537	909	401	636	224
Soltu.DM.08G014150.1	0	0	0	0	4	0	5	0	6	0	0	0	0	0	0	0	0	0	0	0	0	4	0	0	0	0	0	6	0	4
Soltu.DM.06G030650.1	0	0	0	0	0	0	0	0	0	0	0	0	0	0	0	0	0	0	0	0	0	0	0	0	0	0	0	0	0	0
Soltu.DM.06G017180.1	0	0	0	0	0	0	0	0	2	0	0	0	0	0	0	0	0	0	0	0	0	0	0	0	0	0	0	0	0	0
Soltu.DM.04G004130.1	0	0	0	0	1	0	0	0	1	0	0	0	0	0	0	0	0	0	2	0	0	0	2	0	0	0	0	0	0	0
Soltu.DM.04G007630.1	0	0	0	0	0	0	0	0	0	0	0	0	0	0	0	0	0	0	0	0	0	0	0	0	0	0	0	0	0	0
Soltu.DM.05G018590.1	0	0	0	0	0	0	0	0	0	0	0	0	0	0	0	0	0	0	0	0	0	0	0	0	0	0	0	0	0	0
Soltu.DM.08G009870.2	0	0	135	0	0	0	0	0	243	0	0	0	0	0	0	0	0	0	0	0	0	0	0	0	0	0	0	253	0	0
Soltu.DM.08G009870.1	346	233	14	137	185	167	167	381	240	177	232	217	132	240	211	228	168	251	262	174	175	202	164	146	160	138	174	20	250	138
Soltu.DM.11G016200.2	0	0	48	0	0	9	0	0	0	56	0	0	0	0	0	0	0	0	10	0	0	0	0	0	0	3	0	0	0	0
Soltu.DM.10G006390.1	0	0	0	0	0	0	0	0	0	0	0	0	0	0	0	0	0	0	0	0	0	0	0	0	0	0	0	0	0	0
Soltu.DM.03G007830.1	2380	1384	1202	1061	1173	1056	1044	2114	1208	1417	1732	1489	987	1538	1603	1195	1148	1506	2373	1076	976	1331	1548	1135	980	1101	1671	1578	1296	1096
Soltu.DM.04G024590.1	2	7	2	7	4	4	5	0	4	5	7	2	4	11	6	5	3	8	2	2	2	4	4	3	5	2	4	2	4	3
Soltu.DM.04G011180.1	5	0	6	0	5	0	3	6	0	5	0	0	0	0	0	0	0	2	0	9	0	0	0	0	0	0	0	0	5	0
Soltu.DM.06G010680.1	0	0	0	0	0	0	0	0	0	0	0	0	0	0	0	0	0	0	0	0	0	0	0	0	0	0	0	0	0	0
Soltu.DM.05G014590.1	0	0	0	0	0	0	0	0	0	0	0	0	3	0	0	3	0	0	3	0	0	0	0	0	0	0	0	0	0	0
Soltu.DM.07G003480.1	1089	651	491	509	634	643	574	998	556	542	691	663	440	517	682	480	459	794	825	442	412	472	638	392	557	552	731	657	666	541
Soltu.DM.12G028520.1	6821	2885	3372	2743	3241	4684	2787	6899	879	3997	2383	4559	3320	2005	5186	2712	5021	4005	6216	1441	3262	2821	4163	1478	4079	2308	5630	2514	5876	2339
Soltu.DM.04G020870.1	16	6	8	3	8	8	12	4	0	6	9	12	0	0	0	8	8	13	13	10	7	9	12	0	0	0	0	12	6	0
Soltu.DM.01G015540.1	0	0	0	0	0	0	0	0	0	0	0	0	0	0	0	0	0	0	0	0	0	0	0	0	0	0	0	0	0	0
Soltu.DM.06G009990.1	0	0	0	0	0	0	0	0	0	0	0	0	0	0	0	0	0	0	0	0	0	0	0	0	0	0	0	0	0	0
Soltu.DM.03G031380.1	0	0	0	0	0	0	0	0	0	0	0	0	0	0	0	0	0	0	0	0	0	0	0	0	0	0	0	0	0	0
Soltu.DM.09G011730.1	926	496	450	394	386	556	401	1043	580	575	657	555	421	547	576	433	498	460	842	378	369	452	588	426	600	446	648	536	720	424
Soltu.DM.04G028680.1	0	0	0	5	3	0	3	0	0	0	3	0	0	0	4	3	0	3	0	0	0	0	0	0	4	0	5	0	0	0
Soltu.DM.02G022850.4	44	341	99	24	30	5	13	535	0	15	176	106	17	25	12	13	10	4	20	22	21	23	30	23	6	23	12	15	9	8
Soltu.DM.02G034540.1	12207	5788	6701	4763	5502	7727	4885	9787	8101	5934	4411	6337	4478	3869	5770	4813	4184	5559	6044	2591	3109	4400	4684	2474	5505	4256	4946	4425	5847	3607
Soltu.DM.02G022850.1	0	8	75	0	26	0	0	0	0	0	0	0	0	0	0	0	0	0	80	5	0	78	0	0	7	113	6	76	79	4
Soltu.DM.02G022850.2	3269	1620	1935	1226	1913	1923	1631	3354	449	2645	1466	3153	1838	1430	1687	1053	1346	2102	2405	1210	1652	1787	2401	1299	2141	1836	3018	1853	2928	1777
Soltu.DM.02G034540.2	0	4	0	0	13	0	5	5	9	1	0	0	0	3	0	3	0	0	3	0	1	0	0	0	4	0	0	7	0	0
Soltu.DM.01G020610.1	0	0	0	0	0	0	0	0	0	0	0	0	0	0	0	0	0	0	0	0	0	0	0	0	0	0	0	0	0	0
Soltu.DM.01G044270.1	481	215	152	109	166	201	149	324	19	190	205	204	120	190	218	172	202	218	375	95	161	198	235	157	177	129	240	230	174	135
Soltu.DM.01G044270.2	16	11	8	20	6	6	10	16	9	12	16	12	16	15	25	2	12	8	12	30	10	10	24	10	25	23	61	8	41	16
Soltu.DM.04G003610.1	0	0	0	0	3	0	0	0	0	0	0	0	0	0	0	3	0	0	0	0	0	0	0	0	0	0	0	0	0	0
Soltu.DM.04G022450.1	2724	3517	1593	3514	4140	992	4421	3333	8511	1686	8384	2708	1289	6770	1516	6130	717	6028	2087	5237	605	5213	1396	5381	608	4101	1750	8034	946	4641
Soltu.DM.01G051330.2	2929	2083	1957	1946	2244	2092	2314	2894	319	1903	2880	2663	1494	2686	1790	1974	1713	2191	2620	1903	1384	1816	1967	1650	2166	2282	1965	2932	2755	1789
Soltu.DM.08G029680.2	121	143	128	83	71	98	118	219	80	29	51	90	64	51	75	18	25	168	114	53	45	87	87	64	50	47	59	126	194	89
Soltu.DM.01G051330.1	4524	3246	1972	2145	2621	2041	1984	4135	760	2048	2628	1879	1709	2543	3355	2877	2219	2930	3835	1888	2045	2851	2171	2387	1962	2039	2114	2416	2347	2059
Soltu.DM.06G002290.1	0	0	2	0	0	0	0	0	0	0	0	0	0	0	0	0	0	0	2	0	2	0	1	0	0	0	0	1	3	0
Soltu.DM.02G005810.1	796	367	253	315	269	351	288	723	306	335	348	355	302	440	428	417	418	550	672	205	307	425	333	241	337	224	453	368	544	221
Soltu.DM.01G031850.1	1142	465	669	455	364	702	349	1132	267	384	402	662	635	537	617	809	813	509	755	285	672	491	356	212	732	326	682	349	995	315
Soltu.DM.03G001350.2	1714	887	912	724	968	1012	709	1628	1141	968	962	979	671	922	943	753	1002	912	1182	472	655	759	865	538	1073	596	1014	868	1470	710
Soltu.DM.03G001350.1	0	0	2	0	0	0	0	0	0	0	0	0	0	0	0	0	0	0	0	0	0	0	0	0	0	0	0	0	0	0
Soltu.DM.10G009500.1	0	0	0	0	0	0	0	0	0	0	0	0	0	0	0	0	0	0	0	0	0	0	0	0	0	0	0	0	0	0
Soltu.DM.08G009660.1	0	0	0	0	0	0	0	0	0	0	0	0	0	0	0	0	0	0	0	0	0	0	0	0	0	0	0	0	0	0
Soltu.DM.12G013350.1	0	0	0	0	0	0	0	0	0	0	0	0	0	0	0	0	0	0	0	0	0	0	0	0	0	0	0	0	0	0
Soltu.DM.08G029680.1	986	258	319	214	338	430	271	816	1012	479	552	521	325	493	460	492	440	454	534	423	389	407	378	320	403	303	604	524	382	294
Soltu.DM.03G022720.1	0	0	0	0	0	0	0	0	0	1	0	0	0	0	0	0	0	0	0	0	0	0	0	0	1	0	0	0	0	0
Soltu.DM.07G007990.1	3680	2839	2135	2377	2659	1791	2639	4394	664	2927	4163	2703	1412	3656	2938	3150	1990	3738	3449	2773	1463	3265	2423	2954	1651	2530	2477	4013	2291	2683
Soltu.DM.03G022720.3	47	37	14	28	76	22	23	109	641	13	261	8	11	188	26	146	13	216	22	199	59	48	5	140	10	21	10	180	11	28
Soltu.DM.03G022720.2	1411	687	727	683	698	700	582	1838	908	924	1314	1282	685	1120	948	1007	668	910	1186	744	547	710	893	865	586	534	1067	1070	846	577
Soltu.DM.06G028540.1	2624	2244	1154	2678	2692	1808	2465	2721	778	1318	2682	1388	1102	2791	1631	3613	942	3292	1494	1428	641	2674	1136	1532	1107	2049	1333	3205	1289	1951
Soltu.DM.07G026770.1	20	9	32	5	5	24	0	45	13	46	9	28	5	30	20	6	6	14	9	9	16	17	11	6	28	0	16	9	22	10
Soltu.DM.09G007470.2	104	21	17	46	15	90	24	35	61	25	15	35	18	13	45	22	37	24	41	18	53	36	52	27	24	17	41	29	43	38
Soltu.DM.09G024410.1	12	5	12	10	8	7	18	42	17	13	14	27	11	15	40	17	23	8	32	4	12	9	20	6	11	0	24	5	16	6
Soltu.DM.09G005030.1	0	28	0	11	7	5	0	0	4	0	10	0	0	3	0	7	0	17	10	10	2	10	0	12	0	0	5	0	0	5
Soltu.DM.09G007470.1	784	392	380	335	330	477	304	870	263	403	352	492	362	314	441	393	476	413	465	218	197	288	270	231	362	321	485	367	491	290
Soltu.DM.06G031510.1	6547	3465	3084	2591	2959	3469	2866	3504	1218	2437	2791	2574	1822	2625	3029	2364	3252	3243	4029	1753	2815	2879	2979	1804	3055	2337	3038	2745	3650	2202
Soltu.DM.06G034010.1	1153	675	476	497	590	490	578	920	613	469	568	682	488	560	741	445	634	774	1151	427	527	592	731	442	590	522	815	535	741	392
Soltu.DM.06G031510.3	210	0	61	0	0	0	0	62	0	0	0	0	29	0	90	0	55	0	0	2	0	16	0	0	10	23	36	0	0	15
Soltu.DM.06G031510.2	844	14	172	9	9	284	14	196	31	87	9	107	69	10	360	6	248	9	313	9	145	11	69	5	139	0	98	37	266	0
Soltu.DM.01G037940.1	151	155	53	97	125	98	109	101	56	84	90	83	44	107	70	110	59	178	95	84	44	111	86	57	49	119	91	150	108	82
Soltu.DM.02G019340.1	33	2	21	2	8	26	6	16	21	43	14	19	19	36	5	36	14	14	10	15	0	7	7	8	0	9	10	24	0	12
Soltu.DM.06G010360.1	0	0	0	0	0	0	0	0	0	0	7	0	0	0	0	0	0	6	7	7	0	0	0	0	7	0	0	0	4	0
Soltu.DM.10G024480.1	0	0	0	0	0	0	0	0	0	0	0	0	0	0	0	0	0	0	0	0	0	0	0	0	0	0	0	0	0	0
Soltu.DM.09G017930.1	190	184	79	155	225	92	194	162	58	103	249	146	61	180	98	249	61	231	131	160	64	236	62	204	87	202	125	236	131	182
Soltu.DM.04G016190.1	0	0	2	0	0	0	0	0	0	0	0	0	0	0	0	0	0	0	0	0	0	0	0	0	0	0	0	0	0	0
Soltu.DM.S000650.1	0	0	0	0	0	0	0	0	0	0	0	0	0	0	0	0	0	0	0	0	0	0	0	0	0	0	0	0	0	0
Soltu.DM.03G037020.1	602	411	293	351	389	391	301	690	440	411	505	583	244	407	471	435	416	439	625	342	340	410	402	346	513	386	631	431	559	355
Soltu.DM.11G003000.2	4	3	0	36	6	0	24	5	44	0	13	3	5	13	6	82	12	81	6	11	4	50	2	3	0	4	2	24	0	20
Soltu.DM.08G016600.1	0	0	2	2	0	0	0	0	0	0	0	0	0	0	0	0	0	0	0	0	0	0	0	0	0	0	0	0	0	0
Soltu.DM.11G003000.1	1	0	0	1	1	0	1	1	1	0	1	0	0	2	1	1	0	1	0	1	2	1	0	0	0	1	0	1	0	1
Soltu.DM.07G028380.1	1008	744	433	589	727	498	603	982	123	402	555	596	391	548	808	476	554	686	1250	406	470	612	801	392	522	543	828	596	741	433
Soltu.DM.06G010370.1	0	1021	0	0	1066	0	1153	1777	0	0	1331	0	0	0	62	0	1101	1271	1001	0	0	0	108	702	0	0	0	0	0	0
Soltu.DM.06G010370.2	1968	23	1330	1104	47	1261	55	62	993	1098	45	1266	974	1178	1223	1020	75	9	52	635	771	1010	885	18	1084	1062	1095	1043	1575	995
Soltu.DM.11G001240.1	0	0	0	0	0	0	0	5	0	2	0	0	0	0	0	2	8	0	0	4	0	0	0	0	0	1	0	7	0	0
Soltu.DM.02G011750.1	0	0	0	0	0	0	0	0	0	0	0	0	0	0	0	0	0	0	0	0	0	0	0	0	0	0	0	0	0	0
Soltu.DM.01G022540.2	590	285	203	118	184	49	13	491	38	244	154	296	306	30	407	129	304	223	388	96	224	248	184	89	330	93	274	30	417	148
Soltu.DM.01G022540.1	0	0	41	17	0	304	154	0	0	0	0	0	0	154	0	0	0	0	0	0	0	0	0	0	0	40	0	86	0	0
Soltu.DM.12G029660.3	0	0	0	0	0	0	0	0	0	0	0	0	0	0	0	0	0	0	0	0	0	0	0	0	0	0	0	0	0	0
Soltu.DM.12G029660.2	20	18	113	204	118	0	198	338	90	56	90	224	112	109	305	12	163	0	300	52	153	103	176	135	52	8	93	126	123	67
Soltu.DM.12G029660.1	617	198	148	24	107	201	0	204	10	342	124	20	8	16	496	204	553	252	392	40	569	102	205	22	323	181	362	28	414	108
Soltu.DM.07G024000.1	418	164	260	117	163	326	107	537	66	243	200	355	159	258	393	150	196	158	487	117	206	130	284	154	204	122	340	192	261	124
Soltu.DM.01G014600.1	2	0	0	1	0	2	0	6	24	1	0	0	0	2	0	3	2	0	2	0	15	0	2	0	0	0	3	0	0	1
Soltu.DM.10G025160.3	0	0	83	78	153	0	135	46	0	211	40	183	50	127	117	173	133	49	49	0	0	404	61	0	116	63	0	0	0	0
Soltu.DM.02G028940.1	8575	5961	3954	4759	4568	3839	3921	4296	722	3768	5502	3750	2114	4536	5215	2863	3339	5099	5504	4103	2808	5054	5343	3417	3895	3651	3199	4858	3789	3349
Soltu.DM.02G028940.2	1687	1090	954	0	1004	1193	1248	2315	0	745	760	794	1114	1255	326	1564	1015	290	2548	0	1684	829	1039	1064	843	1511	464	1421	2060	1082
Soltu.DM.10G017110.1	0	3	0	66	16	0	20	0	84	0	15	0	0	48	0	180	0	54	0	31	0	35	0	7	0	5	0	53	0	15
Soltu.DM.11G018580.1	0	0	0	0	0	0	0	0	0	0	0	0	0	0	0	0	0	0	0	0	0	0	0	0	0	0	0	0	0	0
Soltu.DM.01G022550.1	600	359	243	364	395	340	439	472	349	307	436	419	258	534	384	548	347	650	420	280	270	459	228	210	367	253	275	425	437	269
Soltu.DM.04G031000.6	0	0	0	0	0	0	0	0	0	0	0	0	0	0	0	0	0	0	0	0	12	0	0	0	12	0	0	0	0	0
Soltu.DM.04G021720.1	3657	596	1622	1947	661	2599	1193	2850	1061	1631	1387	1864	1916	2078	2473	3457	2679	2361	1837	866	1966	1316	944	508	2799	440	1628	1604	3460	793
Soltu.DM.04G012100.1	985	206	501	202	177	384	207	805	80	484	264	683	365	200	619	164	245	145	538	133	195	171	302	107	211	186	376	149	280	156
Soltu.DM.04G002550.1	14	0	13	12	0	6	11	7	15	9	3	7	25	28	3	11	6	20	7	3	0	9	4	5	2	3	10	7	4	3
Soltu.DM.07G025100.1	0	0	0	16	9	0	6	0	0	0	10	0	0	11	0	29	0	37	3	0	0	9	0	0	0	0	0	10	0	8
Soltu.DM.11G009840.1	377	206	151	140	169	242	160	257	48	94	166	176	206	113	147	60	139	133	207	76	136	101	146	87	202	122	128	111	225	110
Soltu.DM.09G006440.3	0	0	0	0	0	0	17	0	0	0	6	0	0	23	0	76	0	57	0	0	0	28	0	0	0	0	1	41	0	0
Soltu.DM.08G005860.1	0	0	0	0	0	0	0	0	0	0	0	0	0	0	0	0	0	0	2	0	0	0	0	0	0	0	0	0	0	0
Soltu.DM.09G005660.1	0	5	0	0	0	0	0	0	0	0	0	0	0	0	7	0	0	0	0	0	0	0	0	0	0	0	0	0	0	0
Soltu.DM.10G026320.1	8	17	0	8	8	29	211	17	0	13	9	9	35	54	0	151	0	3	13	5	5	6	5	5	69	3	366	171	10	0
Soltu.DM.10G014280.1	0	0	0	0	0	0	0	0	0	0	0	0	0	0	0	0	0	0	0	0	0	0	0	0	0	0	0	0	0	0
Soltu.DM.12G009040.1	77	56	63	30	23	77	41	143	0	26	6	66	100	4	205	0	139	24	227	0	95	16	91	6	90	18	290	7	142	14
Soltu.DM.09G020560.3	442	222	176	150	73	262	205	631	85	419	141	212	108	194	342	151	232	94	488	166	178	204	563	312	319	0	476	130	383	222
Soltu.DM.09G020560.2	3608	1475	2094	1289	1705	1787	1214	3616	799	1748	1427	1870	1581	1143	2640	888	1827	1469	2827	833	1500	1138	2585	730	1830	1354	2981	1307	2780	995
Soltu.DM.03G021820.1	25	8	20	36	32	62	51	57	16	31	32	59	73	40	30	24	33	48	15	40	25	40	24	8	35	19	77	50	76	44
Soltu.DM.10G018210.1	265	190	137	128	149	202	159	223	55	161	151	127	138	116	149	217	233	207	211	112	136	172	103	122	167	137	224	138	216	152
Soltu.DM.08G008680.2	80	31	28	78	23	28	47	64	64	22	52	40	40	69	74	168	52	194	94	23	48	92	16	35	38	25	38	89	77	42
Soltu.DM.08G008680.1	0	0	0	0	0	0	0	0	0	0	0	0	0	0	0	0	0	0	0	0	0	0	0	0	0	0	0	0	0	0
Soltu.DM.05G019230.1	33	85	0	508	257	0	552	10	385	8	1213	0	5	1562	24	1578	0	358	21	611	0	336	20	574	0	69	11	1355	12	136
Soltu.DM.11G010440.1	0	0	0	0	0	0	0	0	0	0	0	0	0	0	0	0	0	0	0	0	0	0	0	0	0	0	0	0	0	0
Soltu.DM.12G003060.1	1	88	0	80	28	1	73	0	2	0	30	0	2	62	2	2	33	42	2	6	4	35	6	2	3	77	3	14	8	12
Soltu.DM.01G013990.1	0	0	0	0	0	0	0	0	0	0	0	0	0	0	0	0	0	0	0	0	0	0	0	0	0	0	0	0	0	0
Soltu.DM.03G020550.2	0	0	0	0	0	0	0	0	0	0	0	0	0	0	0	0	0	0	0	0	0	0	0	0	0	0	0	0	0	0
Soltu.DM.06G017100.1	919	645	742	531	551	1641	610	195	10	56	11	33	54	20	37	3	152	98	13	0	111	114	8	6	274	259	18	5	371	184
Soltu.DM.01G002850.3	7518	4868	4429	2876	2722	3827	3064	9257	3302	5787	7554	6672	3854	7717	9015	3978	4492	3919	10291	5907	3760	3585	5681	4951	4235	4023	6344	5966	4942	4033
Soltu.DM.01G002850.2	0	0	0	0	0	0	0	0	0	0	0	0	0	0	0	0	0	0	0	0	0	0	0	0	0	0	0	0	0	0
Soltu.DM.01G002850.1	880	409	220	210	1130	1308	182	1373	488	269	1037	355	55	724	1039	791	529	630	938	384	553	1046	399	461	94	522	104	605	850	359
Soltu.DM.09G012600.1	0	0	0	0	0	0	0	0	0	0	0	0	0	0	0	0	0	0	0	0	0	0	0	0	0	0	0	0	0	0
Soltu.DM.01G002590.1	762	387	261	441	465	328	341	457	200	346	371	252	190	419	567	566	340	589	587	246	261	540	254	164	329	271	333	435	336	282
Soltu.DM.01G002850.4	1	1	0	7	0	9	2	2	29	17	11	0	0	0	7	5	0	0	8	9	3	0	0	0	0	0	0	0	0	6
Soltu.DM.02G018010.1	165	57	67	39	54	155	70	122	126	99	122	139	102	122	108	75	97	46	163	58	61	45	113	72	112	74	131	79	83	23
Soltu.DM.01G032170.1	846	554	392	345	496	429	394	638	398	347	420	415	256	437	525	368	429	418	622	357	339	415	510	263	368	357	430	460	454	366
Soltu.DM.09G006010.1	0	0	0	0	0	0	0	0	0	0	0	0	0	0	0	0	0	0	0	0	0	0	0	0	0	0	0	0	0	0
Soltu.DM.01G011860.1	0	0	0	0	0	0	0	0	2	0	0	0	0	0	0	0	0	0	0	0	0	0	0	0	0	0	0	0	0	0
Soltu.DM.08G002380.1	723	195	373	143	188	366	197	649	101	363	275	479	285	265	477	128	333	216	466	152	212	210	321	154	371	201	577	233	503	172
Soltu.DM.03G025520.1	0	0	0	0	0	0	0	0	0	0	0	0	0	0	0	0	0	0	0	0	0	0	0	0	0	0	0	0	0	0
Soltu.DM.05G026820.1	138	15	82	123	37	52	64	158	140	85	213	85	65	313	136	255	108	115	153	116	82	53	103	47	86	5	92	127	180	29
Soltu.DM.09G025310.1	67	67	29	48	91	49	134	91	50	61	140	53	41	97	45	66	38	50	77	68	32	84	57	78	25	73	66	140	48	79
Soltu.DM.12G028640.1	1215	56	967	22	10	598	36	2985	224	1666	275	1411	832	227	1913	186	583	58	1384	187	340	52	1032	192	418	49	1276	299	473	53
Soltu.DM.01G000940.3	358	128	115	0	20	232	110	327	0	109	114	0	46	132	133	245	173	358	20	145	167	210	123	59	64	104	17	160	164	0
Soltu.DM.01G000940.2	0	0	0	0	0	0	0	0	0	0	0	0	0	0	0	0	0	0	0	0	0	0	0	0	0	0	0	0	0	0
Soltu.DM.01G000940.1	7586	3234	2903	3572	3498	5646	3181	5562	3197	3207	2779	3159	1668	2566	3014	5309	3612	5214	4480	2285	2364	3725	1389	2158	2960	2515	2306	3789	4066	2733
Soltu.DM.05G006170.1	1044	462	563	374	508	382	622	1268	445	1046	817	872	466	651	1227	491	564	583	1217	444	428	430	1083	667	567	408	1264	638	664	566
Soltu.DM.05G006170.2	53	2	48	5	41	0	53	103	2	0	40	15	19	22	45	44	39	17	68	16	0	17	2	32	0	31	0	39	58	0
Soltu.DM.05G006170.3	554	409	339	333	378	299	253	823	284	696	391	382	206	348	609	478	435	477	770	404	280	362	462	235	341	279	485	429	566	309
Soltu.DM.01G040540.1	167	87	62	39	92	127	54	112	49	91	73	104	75	56	116	53	59	91	133	45	58	49	99	45	74	58	94	60	75	63
Soltu.DM.11G018340.1	40	53	59	44	50	40	37	82	60	56	62	75	50	56	51	28	31	33	63	40	29	36	45	51	46	54	75	44	40	34
Soltu.DM.11G006580.1	0	3	0	0	0	0	0	0	9	0	0	0	0	3	0	3	3	0	0	0	0	0	0	0	0	0	0	4	0	0
Soltu.DM.08G004940.1	0	0	0	0	0	0	0	0	0	0	0	0	0	0	0	0	0	0	0	0	0	0	0	0	0	0	0	0	0	0
Soltu.DM.11G005430.1	551	311	256	0	152	320	0	674	86	360	467	242	292	292	724	101	280	338	312	294	102	123	646	220	389	265	575	148	464	307
Soltu.DM.02G011790.1	3	0	0	0	0	3	0	2	0	2	0	2	0	0	0	0	2	0	1	2	2	0	0	0	3	0	2	0	0	0
Soltu.DM.08G024580.1	0	0	14	14	0	11	0	0	0	0	0	0	0	0	0	0	0	0	0	0	0	0	0	0	0	0	0	0	0	0
Soltu.DM.07G023550.1	111	0	0	0	18	114	0	0	91	0	0	166	0	0	0	0	119	0	0	0	0	0	0	58	112	0	0	0	0	0
Soltu.DM.12G024600.2	159	58	73	12	60	262	23	115	3	600	26	657	292	0	11	0	86	26	5	0	58	10	8	0	70	11	8	0	61	10
Soltu.DM.07G023550.3	112	0	10	0	21	0	0	0	0	0	0	0	0	7	65	0	0	23	31	0	52	0	0	43	0	0	0	0	63	42
Soltu.DM.07G023550.2	103	174	138	157	196	21	226	316	127	203	191	0	111	119	125	236	12	196	122	122	62	178	137	0	19	135	168	260	122	91
Soltu.DM.02G012290.1	67	28	24	9	12	35	35	67	16	47	21	32	28	22	118	46	122	83	69	51	93	53	35	62	110	0	72	69	89	0
Soltu.DM.07G026840.1	0	0	0	0	13	0	0	8	20	0	5	0	0	7	7	19	5	10	6	7	0	8	0	0	0	0	0	5	10	0
Soltu.DM.07G019640.1	3794	3468	1153	2043	1798	2851	1966	3079	4779	585	2567	1266	1818	2867	991	864	2185	2215	1219	1229	1717	1500	872	1159	2531	1997	1430	1316	3126	1178
Soltu.DM.07G019640.2	0	0	31	0	0	0	0	0	0	0	0	0	180	0	42	0	0	0	0	0	0	0	0	0	0	0	0	0	52	0
Soltu.DM.08G026390.1	0	0	0	0	0	0	0	0	0	0	0	0	0	0	2	0	0	0	0	0	0	0	0	0	0	0	0	0	0	0
Soltu.DM.08G002520.1	0	0	0	0	0	0	0	0	1	0	0	0	0	0	0	0	0	0	0	1	0	0	0	0	0	0	0	0	0	0
Soltu.DM.08G023120.1	331	296	164	199	316	193	223	258	60	217	226	224	156	217	282	159	144	208	350	164	138	204	290	184	191	191	207	219	199	189
Soltu.DM.02G002150.1	1278	440	364	96	173	187	140	520	81	568	162	350	132	163	390	95	229	444	326	60	98	371	235	74	107	329	236	123	127	174
Soltu.DM.02G028250.1	943	1076	545	963	1267	717	2374	955	868	552	1006	543	526	1204	621	789	473	1131	817	726	319	1037	567	828	474	942	786	1101	644	917
Soltu.DM.09G021620.1	0	0	0	0	0	0	0	3	0	0	0	0	0	0	0	7	0	5	6	0	7	0	0	0	0	0	0	0	0	0
Soltu.DM.03G024760.1	954	478	406	519	541	558	504	965	324	801	845	694	452	675	1067	990	647	991	981	582	397	703	499	398	610	596	585	698	748	422
Soltu.DM.01G031740.1	0	0	0	98	12	0	26	0	54	0	22	0	0	18	0	136	0	149	0	36	0	65	0	7	0	4	0	106	0	17
Soltu.DM.11G024840.1	0	0	0	0	0	0	0	0	0	0	0	0	0	2	0	0	0	0	0	0	0	0	0	0	0	0	0	0	0	0
Soltu.DM.10G025830.1	8044	4042	3992	3438	3859	4588	3757	7945	3842	3811	5162	5194	3664	4748	4068	4881	3707	4732	5052	3346	3152	4321	3360	3649	4190	3604	4397	5362	5282	3500
Soltu.DM.07G011030.1	1	2	0	2	3	2	0	3	0	2	1	0	3	0	0	0	0	2	2	0	2	2	2	2	2	3	0	2	1	0
Soltu.DM.02G002140.1	10	14	0	5	0	0	0	0	0	7	6	0	0	0	0	0	11	0	5	4	0	5	0	0	0	0	0	5	0	0
Soltu.DM.05G022330.1	3	97	0	46	84	0	99	2	205	0	48	0	0	99	0	299	2	140	0	98	0	126	0	45	0	41	0	140	0	60
Soltu.DM.05G011350.1	0	0	0	0	0	0	0	0	3	0	0	0	0	0	0	0	3	0	3	0	0	0	3	0	0	0	0	0	1	0
Soltu.DM.06G004500.1	0	6	0	6	26	0	30	2	34	2	25	0	0	52	0	71	0	36	6	37	0	18	0	22	0	15	0	76	0	15
Soltu.DM.06G029450.1	0	0	0	0	0	0	0	0	0	0	0	0	0	0	0	0	0	0	0	0	0	0	0	0	0	0	0	0	0	0
Soltu.DM.08G004260.1	0	0	0	5	4	3	0	0	0	0	0	0	0	0	0	0	0	0	0	0	0	0	0	0	0	0	0	0	0	0
Soltu.DM.01G039600.1	0	0	0	25	0	0	0	0	22	0	24	0	0	5	0	21	0	0	0	0	0	0	0	0	0	0	0	7	0	0
Soltu.DM.01G033400.1	1489	193	784	185	102	926	148	1167	19	327	55	866	1007	48	984	22	1033	124	1046	28	915	82	420	14	1068	220	806	30	1550	47
Soltu.DM.11G017230.1	0	0	0	0	0	1	0	0	0	0	0	0	0	0	0	0	0	0	0	0	0	0	0	0	0	0	0	0	0	0
Soltu.DM.04G022550.1	18	2	19	2	2	12	2	2	0	4	5	10	10	4	11	3	8	5	5	0	7	0	8	3	6	4	5	2	7	0
Soltu.DM.11G025530.1	14	8	5	9	10	20	8	25	9	29	32	19	15	17	15	16	18	5	10	7	3	5	8	14	3	11	13	12	11	0
Soltu.DM.07G009350.5	13	7	4	5	0	14	0	8	0	0	0	5	0	2	0	0	6	13	5	6	6	10	0	0	4	0	6	0	7	0
Soltu.DM.05G025730.1	0	0	0	0	0	0	0	0	0	0	0	0	0	0	0	0	0	0	0	0	0	0	0	0	0	0	0	0	0	0
Soltu.DM.12G029500.1	1548	253	618	420	274	550	280	1152	1582	411	337	507	324	467	417	534	473	452	842	274	282	383	298	277	480	156	550	431	634	232
Soltu.DM.05G004380.1	0	0	0	24	19	0	8	20	19	0	19	0	19	0	0	36	0	21	3	8	0	19	0	0	0	0	0	0	0	6
Soltu.DM.12G028330.1	398	191	160	198	234	163	179	288	114	167	184	202	167	156	283	166	136	247	264	149	131	144	199	140	182	141	218	203	207	142
Soltu.DM.08G003360.1	1498	704	688	849	1165	870	941	784	246	439	756	614	474	669	597	588	612	837	888	530	472	838	470	550	719	599	676	538	883	721
Soltu.DM.03G012710.1	180	71	74	532	97	181	143	252	168	70	149	107	105	160	113	969	163	543	133	155	128	318	34	28	152	50	87	296	218	116
Soltu.DM.08G003360.2	0	24	0	0	0	0	0	59	0	99	0	91	44	29	0	0	0	0	0	0	0	0	88	0	0	106	0	176	0	115
Soltu.DM.07G008210.1	0	0	0	0	0	0	0	0	3	0	0	0	0	0	0	0	0	0	0	0	0	0	0	0	0	0	0	0	0	0
Soltu.DM.11G016240.1	0	0	0	0	0	0	0	0	2	0	5	0	0	0	0	0	0	0	0	0	0	0	0	0	0	0	0	0	0	0
Soltu.DM.10G018290.1	1062	901	563	1114	1185	911	2744	1062	2175	653	1571	880	909	3766	708	1595	422	1707	747	1191	301	1540	717	1174	401	1019	1903	2157	606	1157
Soltu.DM.07G006520.1	818	744	395	476	586	447	556	810	207	415	649	505	326	555	629	443	472	693	856	445	389	569	542	404	448	531	742	494	668	456
Soltu.DM.01G028780.1	0	0	0	0	0	0	0	0	0	0	0	0	0	0	0	0	0	0	0	0	0	0	0	0	0	0	0	0	0	0
Soltu.DM.01G001750.1	10	9	2	3	0	3	3	9	6	0	13	10	3	0	8	6	0	16	10	9	12	12	7	9	9	6	5	13	12	0
Soltu.DM.01G001750.2	143	99	69	69	78	74	63	132	73	62	105	97	65	92	106	79	74	70	137	69	82	118	80	71	72	79	87	88	115	73
Soltu.DM.08G028960.1	78	17	23	65	33	42	46	39	68	17	47	19	25	54	28	143	52	108	39	31	23	39	11	24	46	13	18	46	41	27
Soltu.DM.02G013950.1	37	40	10	25	33	17	24	6	9	5	5	5	0	4	0	0	3	0	6	0	0	0	0	0	0	0	0	5	0	0
Soltu.DM.10G012690.1	0	0	0	0	0	0	0	0	0	0	0	0	0	0	0	0	0	0	0	0	0	0	0	0	0	0	0	0	0	0
Soltu.DM.10G009140.2	84	0	39	0	0	25	67	0	17	34	61	50	25	101	0	58	95	0	0	58	32	73	0	55	34	80	94	0	72	0
Soltu.DM.12G004180.3	0	3	0	5	0	0	3	0	0	0	3	0	0	0	0	0	0	2	9	0	0	0	6	0	0	0	0	5	0	0
Soltu.DM.06G016090.1	44	34	19	22	32	14	18	42	12	36	41	27	15	37	20	25	19	21	64	13	23	23	25	29	20	26	14	63	30	20
Soltu.DM.10G009140.1	211	194	86	109	160	97	137	262	79	137	128	137	84	139	207	101	127	190	305	120	99	125	164	124	85	100	164	147	91	98
Soltu.DM.11G015550.2	15	17	3	0	12	5	7	0	168	13	2	3	16	49	13	6	4	50	6	58	0	11	9	22	0	0	9	15	0	0
Soltu.DM.11G015550.1	24	23	0	74	68	0	153	31	364	0	212	7	0	236	0	394	0	151	0	17	0	97	0	0	0	24	0	175	0	74
Soltu.DM.01G018980.2	0	0	0	0	0	0	4	0	0	0	0	0	0	0	0	0	0	0	0	0	0	0	0	0	0	0	0	0	0	0
Soltu.DM.01G018980.3	45	0	0	58	4	0	0	0	45	10	60	51	0	53	0	132	0	59	0	35	31	58	0	0	60	9	0	0	0	18
Soltu.DM.01G018980.1	0	9	8	3	1	22	14	42	70	3	0	0	21	54	26	19	31	35	12	1	0	0	20	15	0	0	32	80	75	10
Soltu.DM.05G021510.1	69	51	27	27	47	47	37	64	43	50	43	49	28	69	48	30	22	44	61	40	28	46	34	30	24	26	30	51	28	34
Soltu.DM.11G026190.1	10	0	0	25	0	0	12	9	90	0	73	0	0	65	0	80	0	28	0	5	3	8	0	5	0	0	3	3	0	7
Soltu.DM.11G013570.1	0	0	0	0	0	0	0	0	0	0	0	0	0	0	0	0	0	0	0	0	0	0	0	0	0	0	0	0	0	0
Soltu.DM.03G009560.1	2	0	0	0	0	2	0	5	0	2	0	4	4	5	3	0	0	0	0	0	0	0	0	0	0	0	0	0	0	0
Soltu.DM.04G027870.1	0	0	0	0	0	0	0	0	0	0	0	0	0	0	0	0	0	0	0	0	0	0	0	0	0	0	0	0	0	0
Soltu.DM.05G023640.1	20	3	0	0	0	15	5	13	0	7	7	17	0	8	0	0	0	0	0	0	0	6	0	0	6	5	0	0	0	0
Soltu.DM.01G030090.2	0	0	41	0	0	0	0	0	0	0	0	0	0	42	0	23	0	0	0	0	0	0	0	0	0	0	0	0	0	0
Soltu.DM.01G016640.1	0	0	0	0	0	0	0	0	0	0	0	0	0	0	0	0	0	0	0	0	0	0	0	0	0	0	0	0	0	0
Soltu.DM.01G030090.1	399	267	147	219	231	206	182	312	142	188	252	214	140	203	315	178	199	251	355	203	144	183	257	230	205	186	222	227	190	133
Soltu.DM.02G027160.1	4394	1977	2454	1613	2073	2508	1791	3250	3154	2021	1891	2107	1618	1834	2399	1536	2150	1891	2225	1152	1636	1770	2085	1330	2352	1865	1952	1852	2863	1675
Soltu.DM.02G029150.1	13	5	7	17	17	0	10	6	5	6	10	9	1	16	3	10	2	22	13	25	8	20	8	13	0	12	8	11	6	16
Soltu.DM.01G041320.1	133	87	104	121	161	85	144	149	146	96	133	116	73	149	130	110	68	159	187	91	29	195	102	109	52	86	163	163	94	105
Soltu.DM.07G004410.4	885	548	388	387	556	383	417	997	117	481	376	561	294	392	731	447	637	528	882	282	437	558	419	285	499	328	668	429	695	371
Soltu.DM.07G004410.3	0	7	0	0	5	0	0	0	0	0	0	0	0	0	0	0	0	0	0	0	0	0	0	0	0	0	0	0	0	0
Soltu.DM.01G028130.1	56	8	23	298	31	26	175	69	383	19	99	12	42	167	44	653	45	548	47	96	32	204	9	30	20	17	46	296	38	134
Soltu.DM.07G004410.1	23	2	11	28	17	6	6	21	0	2	27	20	7	15	15	12	12	20	28	7	1	9	8	4	25	10	9	21	24	5
Soltu.DM.10G002760.1	32	0	20	0	0	36	4	11	0	8	0	6	17	0	18	0	19	0	0	0	23	0	0	0	29	0	0	0	19	0
Soltu.DM.10G027320.1	240	59	134	73	96	131	93	220	113	86	97	125	106	91	163	73	173	79	168	55	171	58	91	74	140	74	158	81	253	63
Soltu.DM.07G010440.1	0	0	0	0	0	0	0	0	0	0	0	0	0	0	0	0	0	0	0	0	0	0	0	0	0	0	0	0	0	0
Soltu.DM.08G021590.1	0	0	0	0	0	0	0	0	0	0	1	0	0	0	0	0	0	0	0	0	0	0	0	0	0	0	0	0	0	0
Soltu.DM.01G025940.1	0	0	0	0	0	0	0	0	0	0	0	0	0	0	0	0	0	0	0	0	0	0	0	0	0	0	0	0	0	0
Soltu.DM.03G032570.1	9	0	3	0	0	5	0	2	2	6	4	0	3	2	2	5	0	2	0	0	0	0	1	0	0	2	3	3	2	0
Soltu.DM.08G015260.1	0	0	0	0	0	0	0	0	0	0	0	0	0	0	0	0	0	0	0	0	0	0	0	0	0	0	0	0	0	0
Soltu.DM.05G012050.1	3	0	0	0	0	0	4	0	0	0	9	0	4	5	2	0	0	0	0	6	0	3	0	0	0	7	0	1	1	0
Soltu.DM.03G028920.1	607	504	530	469	699	413	359	715	305	442	713	654	346	627	701	544	184	386	646	465	564	570	641	313	642	511	496	404	519	531
Soltu.DM.03G028920.2	489	370	61	0	111	107	256	169	80	199	0	63	135	35	35	71	360	202	573	154	12	0	148	235	27	54	213	293	119	0
Soltu.DM.09G030980.1	277	590	199	397	474	137	389	289	75	357	327	161	163	358	141	230	136	602	225	292	73	417	251	256	125	380	206	285	144	308
Soltu.DM.09G014720.1	10	0	2	0	0	1	2	2	19	0	1	0	2	0	1	0	3	2	0	1	7	0	2	0	3	2	0	2	0	0
Soltu.DM.06G030220.1	65	78	44	100	72	10	170	18	76	7	33	60	3	153	36	68	46	93	39	60	15	89	38	26	29	80	28	7	41	51
Soltu.DM.06G030220.2	1810	1145	776	950	1104	903	906	1908	1710	1040	1630	1103	708	1181	1219	1279	809	1317	1480	1050	662	1191	909	1033	722	1024	1211	1509	1149	929
Soltu.DM.06G030220.3	125	0	0	0	0	0	22	21	0	0	0	0	0	46	0	0	0	24	0	0	0	0	0	0	16	0	8	0	0	0
Soltu.DM.04G012350.1	21	17	11	13	26	28	22	31	74	15	32	22	14	28	19	52	11	31	25	36	8	23	15	33	15	17	15	37	23	19
Soltu.DM.02G031630.1	1045	2406	585	1561	2225	509	1578	1250	817	1401	1876	898	505	1546	1739	1774	743	2152	1890	1723	526	2201	1266	1793	684	2403	1238	2108	812	1952
Soltu.DM.02G025800.1	1	0	0	1	0	0	2	0	5	0	2	2	0	0	0	0	0	0	0	0	0	0	0	3	1	0	0	0	2	0
Soltu.DM.09G024690.1	0	0	0	0	0	0	0	0	0	0	0	0	0	0	0	0	0	0	0	0	0	0	0	0	0	0	0	0	0	0
Soltu.DM.08G019660.1	11	3	6	0	2	5	0	0	0	5	0	0	11	0	0	0	0	0	0	0	0	0	7	0	0	0	0	0	0	0
Soltu.DM.10G007520.1	0	0	0	0	0	0	0	0	0	0	0	0	0	0	0	0	0	0	0	0	0	0	0	0	0	0	0	0	0	0
Soltu.DM.01G008770.1	0	0	0	0	0	0	0	0	0	0	0	0	0	0	0	0	0	0	0	0	0	0	0	0	0	0	0	0	0	0
Soltu.DM.10G001380.1	44227	33730	22547	21690	18666	38874	21195	32965	14438	6690	26164	26075	49036	31591	16349	6871	31717	25737	15568	10156	24875	18240	11392	11115	39671	25818	22840	15513	48731	18283
Soltu.DM.03G024400.2	0	1	0	0	0	2	4	4	0	0	1	2	0	0	3	0	0	0	0	0	0	2	2	0	0	0	0	0	0	0
Soltu.DM.03G024400.1	10777	2979	5745	2802	3244	5833	2916	13501	2918	6147	4285	6961	4405	3821	8079	3620	5390	3718	7413	2685	3822	3142	5728	2915	4653	2451	6835	4492	6409	2267
Soltu.DM.03G021630.2	39	22	27	5	25	44	37	28	7	10	21	22	47	29	19	14	16	19	33	11	10	16	24	21	11	25	92	15	14	14
Soltu.DM.03G021630.1	0	0	0	0	0	0	0	0	0	0	0	0	0	0	0	0	0	0	0	0	0	0	0	0	0	0	0	0	0	0
Soltu.DM.12G004020.1	0	0	0	0	0	0	0	0	0	0	0	0	0	0	0	0	0	0	0	0	0	0	0	0	0	0	0	0	0	0
Soltu.DM.12G004020.2	329	136	180	172	173	169	179	360	39	256	128	273	171	72	345	91	181	205	248	67	103	177	191	69	204	115	182	137	237	121
Soltu.DM.02G008550.1	1014	432	448	420	292	1074	312	778	329	124	184	681	956	272	290	57	442	470	370	119	398	293	196	104	716	480	400	121	918	331
Soltu.DM.07G019520.1	0	0	0	0	0	0	0	0	2	0	0	0	0	7	0	8	3	8	0	0	3	0	0	0	4	0	0	6	4	0
Soltu.DM.07G025060.1	485	181	268	117	161	258	120	510	221	310	202	408	276	250	240	100	215	198	222	128	209	127	238	118	237	152	243	126	257	140
Soltu.DM.09G000260.1	452	0	298	0	0	265	2	543	0	194	0	485	294	7	357	10	287	0	657	0	354	3	372	0	386	0	524	0	423	5
Soltu.DM.09G027280.1	70	47	13	548	156	35	180	33	651	12	301	9	29	432	0	1649	8	799	9	362	11	511	3	141	25	124	4	592	11	211
Soltu.DM.02G003240.1	0	0	0	0	0	0	0	0	0	0	0	0	0	0	0	0	0	0	0	0	0	0	0	0	0	0	0	0	0	0
Soltu.DM.01G016080.1	0	0	0	0	0	0	0	0	0	0	0	0	0	0	0	0	0	0	0	0	0	0	0	0	0	0	0	0	0	0
Soltu.DM.06G008780.1	0	0	0	0	0	0	0	0	0	0	0	0	0	0	0	0	0	0	0	0	0	0	0	0	0	0	0	0	0	0
Soltu.DM.09G001850.1	41	81	6	30	26	5	20	24	61	19	81	18	11	119	6	73	0	52	9	78	0	51	0	50	0	76	0	71	0	41
Soltu.DM.05G011680.1	0	0	0	0	0	0	0	0	4	0	0	0	0	0	0	0	0	0	0	0	0	0	0	0	0	0	0	0	0	0
Soltu.DM.09G002340.1	10	12	6	2	11	9	6	18	13	13	7	16	7	10	15	16	7	9	11	7	4	8	6	4	8	14	9	6	4	4
Soltu.DM.12G012400.1	0	0	0	0	0	0	0	0	0	0	0	0	0	0	0	0	0	0	0	0	0	0	0	0	0	0	0	0	0	0
Soltu.DM.01G014890.1	0	0	0	0	0	0	0	0	0	0	0	0	0	0	0	0	0	0	0	0	0	0	0	0	0	0	0	0	0	0
Soltu.DM.06G008020.1	0	0	0	0	0	0	0	0	0	0	0	0	0	0	0	0	0	0	0	0	0	0	0	0	0	0	0	0	0	0
Soltu.DM.02G018240.1	1332	1049	711	758	654	684	649	1379	430	793	617	815	693	484	855	324	621	571	1024	280	447	508	621	278	608	679	813	371	751	428
Soltu.DM.02G003050.1	599	387	309	328	387	319	330	664	402	294	430	328	215	403	374	412	247	483	605	323	251	397	375	303	342	292	452	484	377	300
Soltu.DM.04G035080.3	86	72	43	57	44	30	51	90	41	39	71	61	54	81	89	51	41	42	101	59	36	56	76	47	50	37	69	51	48	37
Soltu.DM.02G003050.2	0	0	0	0	15	0	11	43	0	23	18	34	29	0	13	0	0	0	0	0	0	0	0	0	0	0	0	0	0	10
Soltu.DM.01G015380.1	0	0	0	0	0	0	0	0	0	0	0	0	0	0	0	0	0	0	0	0	0	0	0	0	0	0	0	0	0	0
Soltu.DM.07G022570.1	81	123	17	81	70	5	86	0	113	98	123	13	0	121	0	106	11	296	0	66	0	238	0	81	10	71	0	174	22	133
Soltu.DM.11G002430.2	129	0	0	0	5	0	0	0	0	4	0	0	0	0	22	0	0	0	0	0	0	0	0	0	0	0	80	0	0	0
Soltu.DM.05G012650.1	0	0	0	0	0	0	0	0	0	0	0	0	0	0	0	0	0	0	0	0	0	0	0	0	0	0	0	0	0	0
Soltu.DM.02G030610.4	0	0	0	82	0	20	108	152	0	0	84	0	0	36	0	0	98	0	0	0	0	0	0	0	117	0	0	0	212	91
Soltu.DM.02G030610.1	186	204	97	88	196	92	57	22	19	174	96	40	36	53	57	0	59	46	110	28	0	95	122	182	111	137	47	159	59	92
Soltu.DM.02G030610.3	0	0	0	34	0	83	59	56	0	0	22	0	0	23	0	0	61	0	0	0	0	0	0	0	36	0	0	0	75	90
Soltu.DM.02G030610.2	2569	1607	1307	1109	1683	1366	1236	2417	627	1362	1307	1688	1071	1292	1974	1476	1649	1797	2431	1008	1432	1656	1497	856	1283	1239	1830	1435	1554	1010
Soltu.DM.01G002320.1	88	82	65	50	87	76	88	119	104	83	74	124	88	70	55	44	23	62	61	71	18	42	50	52	18	52	50	57	31	58
Soltu.DM.07G016640.1	9	1467	0	946	869	0	1223	0	1505	0	357	0	0	905	0	1569	0	1612	0	540	0	884	0	569	0	490	0	1447	0	501
Soltu.DM.05G020780.1	2832	1009	1218	824	1004	2088	999	1650	319	1134	631	965	804	510	1616	1027	1671	1246	1228	441	1100	838	969	409	1542	658	1334	804	1761	634
Soltu.DM.05G013300.1	1700	906	888	645	826	928	625	1436	983	867	801	853	561	851	993	727	835	835	1173	579	668	693	691	469	726	577	912	736	1096	597
Soltu.DM.08G006450.1	0	0	0	0	0	0	0	0	0	0	0	0	0	0	0	0	0	0	0	0	0	0	0	0	0	0	0	0	0	0
Soltu.DM.01G008170.1	0	0	0	0	0	0	0	0	7	0	0	0	0	0	0	0	0	0	0	0	0	0	0	0	0	0	0	0	0	0
Soltu.DM.05G010810.1	0	0	0	0	0	9	0	0	0	1	0	0	0	0	0	0	0	0	0	0	0	0	0	0	0	0	0	0	0	0
Soltu.DM.05G010810.2	268	196	126	128	150	152	100	253	124	114	168	196	138	156	196	132	233	178	326	126	0	155	195	140	184	130	163	186	231	156
Soltu.DM.05G010810.3	138	154	74	115	183	80	151	114	31	62	159	80	63	106	68	106	74	188	93	76	144	143	58	81	41	168	84	110	91	98
Soltu.DM.10G028790.1	0	0	0	0	0	0	0	3	0	2	0	0	0	0	0	0	0	0	0	0	0	0	0	0	0	0	0	0	0	0
Soltu.DM.05G026190.1	0	0	0	5	0	0	1	0	4	0	2	0	0	0	0	3	0	4	0	0	0	2	0	0	0	0	0	0	0	0
Soltu.DM.04G030530.1	338	173	155	134	112	115	172	429	54	255	168	286	143	180	199	195	105	232	341	130	74	204	190	134	97	122	270	233	130	99
Soltu.DM.04G011020.1	6	0	0	35	16	0	14	0	26	0	3	0	0	19	4	59	4	93	16	21	0	47	0	0	0	0	0	25	0	15
Soltu.DM.10G019820.1	781	504	427	427	510	532	484	761	216	523	421	579	361	334	728	392	367	526	734	263	319	447	497	313	373	459	638	452	516	407
Soltu.DM.10G019820.2	190	190	76	58	111	85	44	268	64	89	76	99	57	91	62	87	171	150	152	83	109	145	165	53	83	37	118	112	163	102
Soltu.DM.04G022790.1	565	42	155	18	32	308	24	286	0	72	12	211	123	5	130	4	75	36	339	3	91	56	70	0	117	50	165	13	135	27
Soltu.DM.09G015130.1	0	0	0	0	0	0	0	0	45	0	0	0	0	0	0	0	0	0	0	0	0	0	0	0	0	0	0	0	0	0
Soltu.DM.05G016460.1	3514	1565	2267	908	1112	1547	916	4988	378	3832	1481	2593	1512	1541	2827	994	1797	1873	3012	1084	1566	1804	2782	1205	1740	1648	2313	1543	2393	1643
Soltu.DM.03G030960.1	137	49	76	34	52	76	110	162	25	85	33	38	52	48	95	76	102	157	194	77	77	81	43	39	71	25	113	75	123	45
Soltu.DM.03G030960.2	0	0	0	0	0	0	0	0	0	0	0	0	0	0	0	0	0	0	0	0	0	0	0	0	0	0	0	0	0	0
Soltu.DM.01G027160.1	2678	1558	1159	1069	1039	2033	902	1886	317	506	652	1082	1669	887	1309	392	1849	1448	1090	379	1339	987	637	383	2072	1317	1310	607	2959	970
Soltu.DM.09G029260.1	30	13	12	19	18	38	20	19	10	13	14	8	25	15	21	13	13	17	22	7	14	14	29	11	18	12	28	21	26	11
Soltu.DM.09G021830.1	65	94	52	100	76	51	80	85	202	49	145	71	35	108	57	117	33	108	65	107	31	110	54	126	30	77	57	152	38	81
Soltu.DM.06G024080.1	1821	1147	1024	959	1069	1199	1014	1832	1244	1049	1183	1168	766	1009	1145	979	1230	1058	1079	704	829	954	896	768	1138	1002	1181	1035	1497	922
Soltu.DM.06G030580.1	0	0	0	0	0	0	0	0	7	0	0	0	0	0	0	0	0	0	0	0	0	0	0	0	0	0	0	0	0	0
Soltu.DM.09G026400.1	3	2	2	0	0	0	0	0	0	0	0	0	0	0	0	0	0	0	0	0	0	0	2	2	0	0	0	0	2	0
Soltu.DM.11G024690.1	714	1029	845	986	745	599	802	808	478	773	1144	586	343	809	933	499	1657	1490	881	574	1200	1409	631	1009	1519	1196	1082	1015	2377	1616
Soltu.DM.11G024690.2	111	139	43	97	40	4	80	128	37	56	51	46	48	113	112	114	13	301	42	68	202	187	63	47	69	116	64	46	80	117
Soltu.DM.09G027440.1	3320	1401	1493	854	1196	1970	1022	1912	207	1337	811	1136	767	835	1984	774	1717	1200	2251	664	1342	964	1458	644	1224	849	1560	865	1675	726
Soltu.DM.03G026500.1	22	19	11	13	15	20	11	23	5	11	13	28	11	24	31	22	11	18	30	10	18	13	18	5	12	9	14	26	12	14
Soltu.DM.01G025550.1	5170	3246	2325	2111	2275	3540	1977	5009	290	1979	1714	3224	3680	2083	3224	925	2861	2235	3577	1202	2320	2033	2620	1012	3099	2293	2444	1495	3577	1690
Soltu.DM.01G049990.1	1001	665	532	309	418	627	351	969	429	430	279	750	690	360	502	120	463	371	557	167	428	285	376	154	597	391	497	171	628	291
Soltu.DM.09G002190.1	20	0	6	0	0	20	0	23	5	0	0	5	7	0	9	0	19	0	42	0	28	0	20	0	28	0	31	0	40	0
Soltu.DM.11G008140.2	11	28	8	17	31	7	8	17	4	3	18	12	33	10	7	2	4	12	24	13	6	40	1	11	14	13	6	10	9	11
Soltu.DM.01G045330.1	1152	654	492	521	723	575	614	1414	366	719	831	961	563	778	932	666	576	829	1145	542	474	691	810	529	618	550	1033	786	763	549
Soltu.DM.11G021700.1	2567	1334	1204	1005	1242	1264	987	2895	990	1216	1530	1677	1183	1456	1960	1278	1205	1488	2487	1131	963	1270	1575	1096	1084	1127	2218	1584	1319	1043
Soltu.DM.01G019190.1	0	0	0	0	0	0	0	0	0	0	0	0	0	0	0	0	0	0	0	0	0	0	0	0	0	0	0	0	0	0
Soltu.DM.02G011510.1	457	498	257	297	398	280	337	525	76	256	228	293	191	243	288	278	215	650	246	262	183	435	231	253	233	302	248	295	271	343
Soltu.DM.05G005580.1	3371	1289	1584	1449	1138	1815	1163	2365	909	1359	1459	1570	1260	1416	1691	1869	1740	1653	1718	894	1574	1383	1168	797	1911	974	1558	1423	2267	1010
Soltu.DM.11G000480.1	0	131	0	142	138	96	0	86	96	0	0	0	23	0	0	54	0	154	76	80	102	0	0	0	105	0	0	59	107	91
Soltu.DM.10G017730.1	262	134	115	79	97	137	95	159	102	114	125	121	106	80	156	86	135	100	151	93	119	80	149	96	174	118	121	105	155	103
Soltu.DM.09G003090.1	4801	2101	2010	1185	1433	2984	1275	4968	1169	2228	1129	2861	2978	1197	2898	644	2512	1456	2737	686	1634	1313	1958	680	2417	1303	1792	739	2941	1122
Soltu.DM.09G003090.2	0	0	0	0	0	0	0	0	0	0	0	0	0	0	0	0	0	0	0	0	0	0	0	0	0	0	0	0	0	0
Soltu.DM.11G016530.1	47	6	19	9	12	26	6	59	36	26	29	36	21	40	40	23	22	16	37	30	14	18	34	16	10	13	23	28	26	17
Soltu.DM.08G015100.2	0	0	0	0	0	0	0	0	0	0	0	0	0	0	0	0	0	0	0	0	0	0	0	0	0	0	0	0	0	0
Soltu.DM.08G015100.1	856	460	411	432	593	489	519	756	103	531	540	489	315	387	614	409	485	581	732	302	340	458	549	365	474	464	770	520	532	355
Soltu.DM.05G003200.1	7	14	2	95	4	1	32	6	190	2	59	0	0	130	3	282	4	32	2	53	0	57	0	33	2	2	2	93	0	10
Soltu.DM.06G003980.1	10	5	0	7	7	4	6	0	16	1	1	21	3	5	4	3	9	12	12	6	0	18	9	0	0	3	1	0	1	13
Soltu.DM.02G019420.1	21	26	6	14	25	19	8	46	5	23	42	23	12	20	27	13	9	25	33	39	5	28	29	15	18	14	18	13	13	8
Soltu.DM.06G034320.1	0	23	0	22	43	0	28	0	9	3	5	0	0	15	0	37	0	46	0	0	0	32	0	3	0	8	0	24	0	4
Soltu.DM.01G021820.1	821	293	336	273	365	417	297	839	398	365	459	546	381	486	517	516	416	478	713	281	335	361	411	294	410	260	446	422	490	235
Soltu.DM.01G021820.2	0	0	0	0	0	5	0	0	0	0	1	0	0	0	0	0	0	0	3	0	0	0	0	3	0	4	3	0	6	0
Soltu.DM.07G020500.1	0	0	0	12	0	0	0	0	6	0	4	0	0	0	0	0	0	5	0	0	0	0	0	0	0	0	0	0	0	0
Soltu.DM.01G036440.1	0	0	0	0	0	0	0	0	0	0	0	0	0	0	0	0	0	0	0	0	0	0	0	0	0	0	0	0	0	0
Soltu.DM.08G019190.1	10	2	3	1	3	11	0	0	0	3	3	4	2	4	3	1	0	2	5	0	2	6	1	0	0	2	2	2	0	3
Soltu.DM.02G018950.1	1548	21	923	37	47	741	38	1739	113	761	238	999	841	204	844	158	801	70	1855	144	582	47	1687	146	705	45	2195	240	1125	36
Soltu.DM.04G007530.2	24	10	5	9	0	8	0	19	14	0	5	0	0	7	0	10	0	12	6	5	10	7	6	0	0	10	11	13	10	0
Soltu.DM.04G007530.3	233	98	63	214	155	140	186	360	337	149	417	248	163	363	217	388	107	292	342	275	77	254	153	215	98	159	233	446	142	156
Soltu.DM.01G007960.1	0	0	0	0	0	0	0	0	0	0	0	0	0	0	0	0	0	0	0	0	0	0	0	0	0	0	0	0	0	0
Soltu.DM.01G020510.1	12	91	11	39	82	8	55	23	31	36	52	20	7	47	20	25	3	80	15	46	6	52	11	21	11	43	17	47	6	44
Soltu.DM.06G018270.1	1316	904	571	622	684	615	553	1268	764	495	982	808	462	855	870	812	544	761	1493	642	462	741	843	645	572	622	627	903	736	559
Soltu.DM.06G011940.1	1329	452	572	438	432	627	413	934	283	515	380	632	441	422	536	602	533	621	751	256	444	690	411	296	530	438	549	481	652	438
Soltu.DM.06G011940.2	0	0	0	0	0	0	0	0	0	0	0	0	0	0	0	0	0	0	0	43	0	0	0	0	0	0	0	0	0	0
Soltu.DM.06G011940.3	0	0	0	0	0	0	0	0	0	0	0	0	0	0	0	0	0	0	0	0	0	0	26	0	19	0	0	6	0	0
Soltu.DM.01G024820.1	77	51	32	60	53	41	46	65	78	46	38	78	37	73	40	104	47	55	83	48	23	34	52	39	42	37	37	68	47	24
Soltu.DM.07G014310.1	5672	1807	3365	1411	1602	2609	1407	7794	2311	2831	3078	4846	2870	2475	6199	2852	2477	2811	6435	2437	2361	2254	5419	2574	2557	1947	5643	3640	3475	1792
Soltu.DM.06G009200.1	0	0	0	0	0	0	0	0	0	0	0	0	0	0	0	0	0	0	0	0	0	0	0	0	0	0	0	0	0	0
Soltu.DM.01G019250.1	0	0	0	0	5	0	0	3	0	0	0	3	1	3	0	0	0	0	0	2	0	2	0	1	0	0	2	0	0	0
Soltu.DM.10G011780.1	0	0	0	0	0	0	0	0	0	0	0	0	0	0	0	0	0	0	0	0	0	0	0	0	0	0	0	0	0	0
Soltu.DM.11G019660.1	6	0	0	10	29	0	0	0	5	8	0	0	0	0	0	13	0	53	0	0	0	20	0	6	0	10	5	17	0	13
Soltu.DM.01G006060.1	0	0	0	0	0	0	0	0	3	0	0	0	0	0	0	0	0	0	0	0	0	0	0	0	0	0	0	0	0	0
Soltu.DM.10G006800.1	0	0	0	0	0	0	0	0	0	0	0	0	0	0	0	0	0	0	0	0	0	0	0	0	0	0	0	0	0	0
Soltu.DM.11G018730.1	0	0	0	0	0	0	0	0	0	0	0	0	0	0	0	0	0	0	0	0	0	0	0	0	0	0	0	0	0	0
Soltu.DM.10G000370.1	888	405	460	238	336	401	298	827	227	425	355	527	348	314	517	341	381	463	628	166	253	419	312	174	339	274	408	296	366	278
Soltu.DM.06G019010.1	17	17	13	10	11	10	6	29	20	8	27	14	11	35	10	22	2	11	13	28	3	12	12	25	4	12	11	34	5	10
Soltu.DM.10G001620.3	63	0	0	28	0	0	0	114	8	0	40	0	0	29	13	0	0	0	0	0	89	0	0	0	126	0	22	0	0	27
Soltu.DM.10G001620.2	3	0	2	0	3	0	3	8	0	0	2	3	0	0	0	0	0	3	2	2	4	0	0	0	0	3	6	0	0	0
Soltu.DM.10G001620.1	1129	682	517	598	760	603	728	1268	309	735	670	811	502	668	881	676	624	925	1105	499	426	741	726	459	498	603	846	728	852	552
Soltu.DM.02G023950.1	952	681	504	620	717	593	739	1056	552	564	901	815	488	679	601	641	504	817	869	620	454	704	636	520	548	635	687	860	663	635
Soltu.DM.04G005650.1	455	332	229	311	335	237	286	552	161	338	399	473	204	354	524	304	306	299	441	253	168	238	358	278	244	290	522	373	396	270
Soltu.DM.09G016260.1	0	0	0	3	6	0	0	2	1	0	1	0	0	0	0	0	0	0	0	0	4	0	0	0	0	0	0	0	8	0
Soltu.DM.02G016620.1	137	35	53	60	57	77	34	105	44	88	44	70	51	63	79	70	125	81	96	39	53	72	38	27	75	17	42	41	110	17
Soltu.DM.09G016260.2	0	9	11	50	28	25	30	27	73	6	59	3	8	61	16	99	11	151	19	27	20	72	8	8	13	21	9	54	10	42
Soltu.DM.02G025560.1	125	91	63	91	61	103	84	123	104	67	107	126	82	123	86	85	80	119	134	72	68	99	83	60	69	104	72	91	103	91
Soltu.DM.06G000630.1	271	132	108	95	127	135	109	177	32	109	141	126	66	136	167	130	125	123	192	122	97	140	121	99	159	110	179	125	176	109
Soltu.DM.10G022510.1	2006	777	922	631	825	1113	657	2122	404	1082	732	1389	964	667	1192	602	872	846	1570	442	699	685	1087	485	954	695	1199	712	1386	625
Soltu.DM.02G030390.1	0	42	150	23	44	0	33	32	20	23	15	26	36	9	9	10	19	27	19	7	10	24	8	18	23	32	12	10	29	28
Soltu.DM.12G019670.1	0	0	0	6	0	0	0	0	34	0	8	0	0	9	0	24	0	10	0	4	0	0	0	3	0	0	0	0	0	0
Soltu.DM.01G018060.1	0	0	0	0	0	0	0	0	0	0	0	0	0	0	0	0	0	0	0	0	0	0	0	0	0	0	0	0	0	0
Soltu.DM.06G021110.2	0	0	0	0	0	0	0	0	0	0	0	0	0	0	0	0	0	0	0	0	0	0	0	0	0	0	0	0	0	0
Soltu.DM.10G003910.1	1272	869	580	586	792	757	740	1097	129	611	675	680	530	682	881	567	783	907	1212	455	643	763	716	403	688	551	1041	626	1098	513
Soltu.DM.02G014550.1	698	476	193	250	342	385	415	906	491	270	508	481	188	549	401	353	197	362	970	383	160	405	421	366	170	329	560	543	270	296
Soltu.DM.09G028710.1	5649	2152	1829	2375	1402	2962	1959	3336	728	1299	2050	1835	893	1956	2153	2257	2176	2838	5585	1484	2065	2306	1940	1613	2027	1121	3068	2406	2350	1282
Soltu.DM.09G001390.1	227	532	19	565	613	37	572	23	455	37	486	18	8	726	0	756	3	1229	0	511	0	1152	0	435	0	383	0	730	0	564
Soltu.DM.07G016560.1	649	374	292	345	340	317	373	532	392	255	288	344	230	284	403	281	308	488	416	196	255	397	278	186	338	318	352	341	439	303
Soltu.DM.09G002890.1	0	0	0	0	0	0	0	0	0	0	0	0	0	0	0	0	0	0	0	0	3	0	0	0	0	0	0	0	0	0
Soltu.DM.01G036280.1	5	3	8	4	8	14	6	16	2	8	5	7	7	12	13	7	7	3	10	1	7	0	4	0	4	3	2	4	6	2
Soltu.DM.12G019660.1	0	0	0	95	14	0	39	0	35	0	0	0	0	25	0	136	0	79	0	29	0	38	0	0	0	0	0	48	0	24
Soltu.DM.08G017260.1	1429	78	408	516	144	676	240	3245	1838	386	662	314	1117	1980	2411	1040	1733	261	1071	459	817	286	475	86	1118	202	1446	218	1867	214
Soltu.DM.07G027300.1	4	0	0	0	0	2	0	3	2	4	0	3	0	0	2	0	0	0	0	0	0	0	0	0	0	0	2	0	0	0
Soltu.DM.08G005310.1	0	0	0	0	0	0	0	0	0	0	0	0	0	0	0	0	0	0	0	0	0	0	0	0	0	0	0	0	0	0
Soltu.DM.04G037430.1	3	2	11	0	3	19	0	11	3	8	9	3	8	10	9	5	7	4	10	8	9	11	25	0	7	2	20	15	4	0
Soltu.DM.04G024850.1	28	29	13	22	26	24	14	38	36	12	32	25	21	41	15	21	22	42	30	24	14	24	16	11	18	11	28	31	18	17
Soltu.DM.12G016430.1	10	0	5	4	3	8	2	0	0	0	6	0	0	0	0	0	0	0	0	0	0	0	0	0	0	0	0	0	0	0
Soltu.DM.12G022830.1	5	0	6	0	0	0	0	0	0	8	0	4	0	0	0	0	0	0	0	0	0	0	0	0	0	0	7	0	0	0
Soltu.DM.01G040260.2	6	4	9	65	24	4	17	33	22	9	76	9	15	9	27	8	6	12	10	9	15	7	17	1	5	5	20	7	31	11
Soltu.DM.01G040260.3	0	0	0	0	0	0	0	0	0	0	0	0	0	0	0	0	0	0	0	0	0	0	0	0	0	0	0	0	0	0
Soltu.DM.01G031180.1	26	53	11	18	30	20	20	43	7	17	28	18	19	26	43	45	18	31	61	24	15	29	43	11	19	20	31	20	29	23
Soltu.DM.01G040260.1	172	184	90	29	101	117	96	100	94	89	52	165	65	92	22	92	47	162	41	97	17	112	13	109	44	90	0	118	22	123
Soltu.DM.01G023280.1	6	0	0	0	4	0	5	6	4	0	0	5	0	8	6	0	0	3	10	4	0	0	5	3	3	0	5	7	0	5
Soltu.DM.04G001430.1	0	0	0	0	0	0	0	0	0	0	0	0	0	0	0	0	0	0	0	0	0	0	0	0	0	0	0	0	0	0
Soltu.DM.02G015180.1	0	0	0	1	0	0	0	0	0	0	0	0	0	0	0	0	0	0	0	0	0	0	0	0	0	0	0	0	0	0
Soltu.DM.02G008780.1	17	0	12	14	24	24	22	8	3	7	5	7	0	10	0	0	0	0	0	0	0	0	0	0	0	0	0	0	0	0
Soltu.DM.05G011010.1	0	0	0	0	0	0	0	0	0	0	0	0	0	0	0	0	0	0	0	0	0	0	0	0	0	0	0	0	0	0
Soltu.DM.12G017040.1	0	0	0	0	0	0	0	0	0	0	0	0	0	0	0	0	0	0	0	0	0	0	0	0	0	0	0	0	0	0
Soltu.DM.11G019240.2	2159	832	1054	839	962	1018	837	2173	697	1245	1148	1382	898	970	1573	965	1142	975	2363	778	901	910	1532	892	1019	823	1851	957	1490	755
Soltu.DM.11G019240.1	0	173	2	4	17	3	1	145	0	0	1	4	25	70	4	8	2	113	3	4	60	113	0	4	26	0	3	60	0	7
Soltu.DM.01G023290.1	809	565	376	341	456	453	359	791	207	421	496	485	330	480	594	438	435	557	906	334	336	517	499	317	420	446	514	514	482	301
Soltu.DM.11G004170.1	14	0	0	0	12	13	0	19	0	10	0	0	0	4	6	0	10	0	12	9	7	9	9	0	0	0	0	7	0	0
Soltu.DM.06G000950.1	236	175	145	145	185	176	216	153	128	104	211	134	90	193	79	162	77	186	142	146	70	210	100	131	93	205	95	224	111	205
Soltu.DM.08G004800.3	241	158	79	113	166	302	1063	239	28	144	98	40	207	447	122	153	17	292	37	114	40	238	169	93	88	88	1104	144	144	93
Soltu.DM.08G004800.2	0	0	0	0	0	0	0	0	0	0	0	0	0	0	0	0	0	0	0	0	0	0	0	0	0	0	0	41	0	0
Soltu.DM.09G002110.1	550	165	543	85	104	260	39	1022	17	835	140	383	225	108	409	34	376	250	496	30	282	108	477	30	419	66	450	79	532	33
Soltu.DM.04G005490.1	0	0	0	0	0	0	0	0	0	0	0	0	0	0	0	0	0	0	0	0	0	0	0	0	0	0	0	0	0	0
Soltu.DM.09G004710.3	34	104	18	49	88	20	98	35	13	27	33	21	7	14	11	21	19	62	20	26	12	70	12	16	16	78	15	24	10	91
Soltu.DM.09G004710.1	0	0	0	0	0	0	0	2	0	0	0	0	0	0	0	0	5	5	0	0	0	0	0	0	0	0	0	0	0	0
Soltu.DM.10G028610.1	2	0	0	0	0	1	0	0	0	2	0	0	0	0	0	0	0	0	0	0	0	0	0	0	0	0	0	0	0	0
Soltu.DM.12G018750.1	7	0	0	0	0	0	0	0	0	0	0	0	0	0	0	0	0	0	0	3	0	0	0	0	0	0	0	0	0	0
Soltu.DM.11G013520.1	0	0	0	0	0	0	0	0	0	0	0	2	0	0	0	0	0	0	0	0	0	0	0	0	0	0	0	0	2	0
Soltu.DM.08G003160.1	0	0	0	0	0	0	0	0	4	0	0	0	0	0	0	0	0	0	0	0	0	0	0	0	0	0	0	0	0	0
Soltu.DM.12G022630.1	177	15	60	5	5	71	12	57	108	7	19	54	97	31	46	39	83	9	37	22	67	8	16	22	54	10	16	27	93	8
Soltu.DM.04G000560.1	106	75	54	40	34	47	37	60	13	24	43	26	40	56	63	21	51	36	73	27	49	36	34	33	46	28	48	38	79	23
Soltu.DM.01G005100.1	0	0	6	0	0	0	0	0	0	0	0	0	0	0	0	0	0	0	0	0	0	0	0	0	0	0	0	0	0	0
Soltu.DM.05G023680.1	40	35	28	30	36	44	27	61	15	42	58	48	24	49	30	43	13	52	73	21	13	36	35	47	13	0	18	53	32	30
Soltu.DM.04G002150.1	0	0	0	0	0	0	0	0	0	0	0	0	0	0	0	0	0	0	0	0	0	0	0	0	0	0	0	0	0	0
Soltu.DM.01G009770.1	0	0	0	0	0	0	0	0	0	0	0	0	0	0	0	0	0	0	0	0	0	0	0	0	0	0	0	0	0	0
Soltu.DM.08G012690.1	7	0	0	0	0	0	0	0	0	0	0	0	0	0	0	0	0	0	0	0	0	0	0	0	0	0	0	0	0	0
Soltu.DM.10G009610.1	0	0	0	0	0	0	0	0	0	0	0	0	0	0	0	0	0	0	0	0	0	0	0	0	0	0	0	0	0	0
Soltu.DM.04G029920.1	12	330	0	204	365	0	248	0	125	0	182	0	0	254	0	106	0	185	0	158	0	229	0	146	0	240	0	157	0	231
Soltu.DM.01G017120.1	0	0	0	0	0	0	0	0	0	0	0	0	0	0	0	0	0	0	0	0	0	0	0	0	0	0	0	0	0	0
Soltu.DM.04G027720.1	2557	979	1576	677	581	1842	700	2557	369	733	319	1851	2101	304	879	34	1572	629	1138	94	1048	430	780	35	1988	702	1311	89	2381	459
Soltu.DM.01G035390.1	5	0	4	0	2	0	6	13	9	11	23	4	8	21	0	14	10	7	3	0	7	8	3	3	7	0	12	0	9	2
Soltu.DM.06G018770.4	166	11	36	13	2	33	10	62	48	39	34	52	46	5	2	22	8	50	73	4	21	14	17	4	13	3	48	24	86	6
Soltu.DM.06G018770.1	52	83	10	28	96	124	8	112	72	13	33	6	63	31	102	36	0	85	23	99	0	56	20	47	0	117	0	9	53	45
Soltu.DM.01G019010.1	0	0	0	8	0	0	0	0	10	0	0	0	0	0	12	13	0	5	0	15	0	0	8	15	0	0	0	12	0	0
Soltu.DM.06G018770.3	79	0	55	29	0	52	33	35	0	24	17	28	91	53	70	11	101	68	67	0	44	26	14	4	26	0	51	21	70	7
Soltu.DM.08G012680.1	11	0	0	0	0	4	0	0	0	0	0	0	0	1	0	0	0	0	0	0	0	0	0	0	0	0	0	0	0	0
Soltu.DM.08G002030.2	1335	790	716	636	649	472	715	914	691	618	614	922	566	741	384	552	498	746	593	491	394	771	509	415	519	770	482	569	708	605
Soltu.DM.02G005830.1	3167	1720	1461	1028	1043	1750	964	2925	568	1259	1532	2467	1922	1602	1710	743	1620	1530	1986	873	1335	1259	1322	811	1996	1327	1738	1108	2409	946
Soltu.DM.02G006570.1	0	0	0	0	0	0	0	0	0	0	0	0	0	0	0	0	0	0	0	0	0	0	0	0	0	0	0	0	0	0
Soltu.DM.12G007950.1	0	0	0	0	0	0	0	0	0	0	0	0	0	0	0	0	0	0	0	0	0	0	0	0	0	0	0	0	0	0
Soltu.DM.01G041280.1	777	1471	364	1691	1311	262	1489	656	5283	423	1062	363	239	714	391	1197	275	952	353	515	228	887	260	435	214	576	410	1242	348	930
Soltu.DM.07G015880.1	944	587	393	347	355	514	329	768	115	316	407	445	338	373	690	388	567	444	907	289	538	410	584	295	498	326	555	400	679	238
Soltu.DM.02G033990.2	0	0	0	8	0	6	0	0	0	0	0	5	0	0	0	0	0	0	46	7	0	0	0	0	0	0	0	0	0	0
Soltu.DM.02G033990.1	71	24	35	22	49	47	36	48	36	25	33	51	51	72	32	76	79	59	39	25	27	43	35	38	51	24	49	58	76	27
Soltu.DM.01G012010.1	7	2	0	3	1	0	0	9	1	3	3	0	0	6	5	0	4	2	5	0	2	4	3	0	3	0	0	2	2	0
Soltu.DM.03G017210.1	4154	2225	2076	2163	2586	1947	2358	4538	1907	2848	2984	2885	1351	2526	2417	2551	1496	3259	2939	1968	1146	2765	2048	2396	1680	2160	2703	3486	2015	2311
Soltu.DM.04G013410.1	0	0	0	0	0	0	0	0	0	0	0	0	0	0	0	0	0	0	0	0	0	0	0	0	0	0	0	0	0	0
Soltu.DM.01G040970.1	11	0	0	0	0	5	0	0	0	0	0	0	0	0	0	0	0	0	7	0	0	0	0	0	0	0	0	0	2	0
Soltu.DM.02G014250.1	146	122	49	93	116	80	100	100	91	76	133	97	66	113	140	72	62	132	208	85	61	122	162	85	89	104	73	136	123	108
Soltu.DM.06G015590.2	0	0	0	0	0	0	0	0	0	0	0	0	0	0	0	0	0	0	0	0	0	0	0	0	0	0	0	0	0	0
Soltu.DM.07G027380.1	173	112	83	65	79	99	76	122	47	64	74	82	63	74	90	67	79	77	111	37	57	60	73	62	62	68	112	57	88	51
Soltu.DM.02G031400.1	681	306	354	287	246	447	209	935	608	334	710	559	433	518	834	544	674	390	1199	538	549	357	658	511	639	290	1093	711	737	253
Soltu.DM.07G015690.1	101	8	32	2	7	39	6	63	5	13	6	23	19	12	59	8	71	17	53	0	28	6	23	2	46	8	79	2	88	17
Soltu.DM.10G021620.1	0	0	0	0	0	7	0	13	0	9	4	10	11	0	7	2	5	4	5	0	0	0	11	0	2	2	0	0	8	0
Soltu.DM.02G007040.2	0	0	0	0	0	0	0	0	0	0	0	0	0	0	0	0	0	0	0	0	0	0	0	0	0	0	0	0	0	0
Soltu.DM.02G007040.1	0	0	0	0	0	0	0	0	0	0	0	0	0	0	0	0	0	0	0	0	0	0	0	0	0	0	0	0	0	0
Soltu.DM.07G012710.1	14803	3617	6034	4069	3736	5143	4070	11792	10740	7265	11229	7065	3012	10773	5431	9971	1824	5275	4869	8760	1295	4478	3835	8433	1910	4013	4523	12652	3188	4123
Soltu.DM.02G027240.1	3883	2734	1575	1827	2122	1482	1733	3636	2711	1819	3216	2177	1318	3086	2479	2649	1635	2810	4490	2486	1583	2586	2336	2130	1638	1924	2361	2850	2088	1579
Soltu.DM.08G025400.1	92	50	43	33	35	69	43	62	27	31	24	45	46	24	41	17	37	49	47	20	61	37	54	26	43	45	44	19	60	24
Soltu.DM.02G001890.1	2700	1414	1354	1060	1371	1498	1112	1897	905	1189	1051	1023	778	1065	1463	1098	1366	1463	1680	746	1130	1214	1041	775	1442	1116	1044	1202	1679	897
Soltu.DM.04G006250.1	0	0	0	0	0	0	0	0	0	0	0	0	0	0	0	0	0	0	0	0	0	0	0	0	0	0	0	0	0	0
Soltu.DM.09G016940.1	145	624	86	967	658	61	849	149	399	79	1652	160	90	1714	129	1594	42	1278	184	1007	38	1024	107	864	53	698	124	1549	81	713
Soltu.DM.05G023690.1	82	12	29	14	20	37	18	40	10	43	42	38	27	16	26	9	24	22	88	25	10	24	31	26	39	16	0	0	22	30
Soltu.DM.02G001880.1	14727	7660	7809	6450	8757	10639	7070	11072	770	7483	5404	6819	5217	4839	13053	5641	9240	9232	14687	3789	7450	6367	12771	3655	8443	5880	12145	6074	10981	5105
Soltu.DM.03G036270.1	1501	915	657	656	907	906	730	1401	1474	806	1067	902	597	882	1062	844	881	919	1475	631	708	761	938	798	772	669	1220	977	1203	743
Soltu.DM.01G010670.1	0	0	0	0	0	0	0	0	0	0	0	0	0	0	0	0	0	0	0	0	0	0	0	0	0	0	0	0	0	0
Soltu.DM.06G028780.1	4228	1020	2353	955	914	2900	816	4872	1436	1730	1458	2997	2338	1487	3527	1389	2971	1281	5162	1143	3057	1114	3039	942	3252	959	5144	1279	4496	700
Soltu.DM.07G011480.1	0	0	0	0	0	0	0	0	0	0	0	0	0	0	0	0	0	0	0	0	0	0	0	0	0	0	0	0	0	0
Soltu.DM.02G011870.1	342	75	155	53	36	165	45	438	34	213	61	226	275	54	297	54	295	48	254	24	174	34	100	41	258	39	241	26	337	32
Soltu.DM.03G006510.1	0	0	0	0	0	0	0	0	0	0	0	0	0	0	4	2	0	0	0	0	0	0	0	0	0	4	0	0	0	0
Soltu.DM.02G033010.2	140	0	0	0	0	0	0	196	0	0	133	0	0	114	112	0	53	0	114	0	48	103	52	0	0	107	108	50	0	122
Soltu.DM.03G031130.1	229	143	146	135	168	144	131	252	278	165	222	205	136	119	156	163	132	148	177	129	102	113	133	125	125	122	221	172	154	124
Soltu.DM.02G033010.1	1489	1145	715	890	1066	686	832	2183	881	1030	1507	1295	664	1540	1655	1191	728	1284	2787	1211	639	1250	1733	1088	746	933	1594	1616	1074	709
Soltu.DM.02G027970.1	1332	325	762	169	186	925	191	1381	436	515	416	850	802	469	790	293	845	179	1429	210	874	187	807	169	1037	233	1257	236	1335	184
Soltu.DM.09G023920.1	68	52	41	26	18	34	24	65	40	44	63	67	41	55	50	37	66	23	68	44	29	25	46	40	35	30	69	34	69	0
Soltu.DM.05G023800.1	152	56	64	17	18	65	20	94	195	28	15	32	71	31	39	19	56	47	72	21	114	23	30	11	40	20	45	24	47	11
Soltu.DM.S000090.1	0	0	0	0	0	0	0	0	0	0	0	0	0	0	0	0	0	0	0	0	0	0	0	0	0	0	0	0	0	0
Soltu.DM.06G006120.1	159	120	137	84	85	104	84	148	37	81	85	93	66	88	83	37	104	85	105	49	69	70	53	51	104	106	47	64	105	56
Soltu.DM.02G003420.1	2	0	21	19	0	15	7	20	3	0	14	13	13	0	12	0	5	6	2	5	9	0	5	10	3	0	0	10	4	0
Soltu.DM.02G003420.2	37	0	0	0	0	0	0	120	73	25	0	0	0	41	192	49	195	0	266	0	119	0	45	5	112	0	94	8	187	0
Soltu.DM.01G013420.1	0	0	0	0	0	0	0	0	0	0	0	0	0	0	0	0	0	0	0	0	0	0	0	0	0	0	0	0	0	0
Soltu.DM.02G017970.1	1574	475	683	498	447	622	491	1531	924	953	661	954	522	689	882	856	507	734	967	456	381	630	708	406	522	497	833	694	586	356
Soltu.DM.07G014820.1	0	0	0	0	0	0	0	0	0	0	0	0	0	0	0	0	0	0	0	0	0	0	0	0	0	0	0	0	0	0
Soltu.DM.01G013770.2	0	0	0	0	0	0	0	0	0	0	0	0	0	0	0	0	0	0	0	0	0	0	0	0	0	0	0	0	0	0
Soltu.DM.01G012460.1	0	0	0	0	0	0	0	0	0	0	0	0	0	0	0	0	0	3	0	0	0	4	0	0	0	0	0	0	0	0
Soltu.DM.05G024950.1	0	0	0	0	0	2	0	0	0	0	0	0	0	0	0	0	0	0	0	0	0	0	0	0	0	0	0	0	0	0
Soltu.DM.09G029580.1	211	66	0	130	154	0	0	204	66	120	94	137	0	0	218	115	143	212	325	0	162	82	259	0	213	81	374	109	274	0
Soltu.DM.10G007360.1	0	0	0	0	0	0	0	0	0	0	0	0	0	0	0	0	0	0	0	0	0	0	0	0	0	0	0	0	0	0
Soltu.DM.11G001360.1	23	2	7	0	3	2	0	40	2	7	2	4	9	2	34	0	7	0	15	4	9	2	6	2	5	0	24	0	21	0
Soltu.DM.02G017960.1	3080	2282	1417	1511	2009	1444	1624	3295	1019	1411	2518	2010	1294	2219	2643	1898	1544	2284	3617	1864	1443	2134	2581	1890	1508	1783	2463	2287	2102	1710
Soltu.DM.04G010550.1	0	0	0	0	0	0	0	0	0	0	0	0	0	0	0	0	0	0	0	0	0	0	0	0	0	0	0	0	0	0
Soltu.DM.01G046860.1	26	0	22	8	7	10	0	22	0	27	0	13	13	0	0	3	0	19	0	0	0	20	10	0	8	0	0	11	5	5
Soltu.DM.04G005080.1	26	53	14	32	73	10	15	81	55	23	77	33	16	60	107	61	20	46	133	45	18	67	77	44	19	31	99	62	28	27
Soltu.DM.06G027050.3	86	119	88	58	71	203	24	73	101	99	39	175	92	27	107	84	81	98	101	56	33	23	92	30	58	31	347	148	107	144
Soltu.DM.06G027050.2	0	0	0	0	0	0	0	22	0	0	0	50	0	0	0	0	0	0	0	0	0	0	0	0	0	0	0	0	0	0
Soltu.DM.06G027050.1	627	244	268	180	267	220	234	429	7	184	263	203	197	252	343	168	248	176	499	182	236	215	331	197	279	212	92	190	345	73
Soltu.DM.11G007660.1	0	0	0	0	0	0	0	0	0	0	0	0	0	0	0	0	0	0	0	0	0	0	0	0	0	0	0	0	0	0
Soltu.DM.01G013340.1	0	0	0	0	0	0	0	0	0	0	0	0	0	0	0	0	0	0	0	0	0	0	0	0	0	0	0	0	0	0
Soltu.DM.S002480.1	25	0	8	0	0	4	5	12	2	13	0	0	7	3	0	0	6	3	20	3	4	0	8	0	5	0	4	4	5	0
Soltu.DM.10G022150.1	0	0	0	0	0	0	0	0	0	0	0	0	0	0	0	0	0	0	0	0	0	0	0	0	0	0	0	0	0	0
Soltu.DM.10G007440.1	0	0	0	0	0	0	0	0	0	0	0	0	2	0	0	0	0	0	0	0	0	0	0	0	2	0	0	0	0	0
Soltu.DM.04G037570.1	375	211	183	132	203	156	184	344	207	182	299	250	153	266	194	212	146	233	277	167	123	177	206	144	205	149	272	250	253	139
Soltu.DM.02G030450.1	1907	0	219	0	0	718	0	2040	2	1144	0	462	2144	16	2608	7	873	0	2528	0	635	0	533	0	1355	0	1295	0	1005	4
Soltu.DM.10G021850.1	175	128	57	114	125	134	103	137	81	43	227	87	83	224	74	121	66	148	117	109	56	103	79	134	95	129	70	207	86	110
Soltu.DM.08G016820.1	1092	623	593	364	416	753	325	984	112	457	379	706	688	336	560	213	638	414	493	205	361	312	316	177	588	377	389	255	690	303
Soltu.DM.01G044970.1	0	0	0	0	0	0	0	0	0	0	0	0	0	0	0	0	0	0	0	0	0	0	0	0	0	0	0	0	0	0
Soltu.DM.12G006540.1	435	472	175	631	722	161	645	392	368	232	450	192	146	300	225	537	112	1038	278	269	80	773	120	309	173	507	165	650	154	532
Soltu.DM.03G016490.1	2	3	2	0	4	0	0	3	0	0	0	5	0	0	5	0	0	0	0	0	0	0	0	0	0	5	0	0	3	0
Soltu.DM.08G006710.3	26	0	7	0	0	25	0	16	0	0	0	16	13	0	0	0	12	0	17	0	10	0	16	6	13	0	20	0	15	0
Soltu.DM.08G006710.2	0	0	0	0	0	0	0	0	0	0	0	0	0	0	0	0	0	0	0	0	0	0	0	0	0	0	0	0	0	0
Soltu.DM.08G006710.1	0	0	0	0	0	0	0	0	0	0	0	0	0	0	0	0	0	0	0	0	0	0	0	0	0	0	0	0	0	0
Soltu.DM.07G003630.1	212	0	175	0	0	326	0	515	0	467	8	537	278	7	380	0	158	0	556	2	97	6	459	0	167	0	664	0	197	0
Soltu.DM.09G027030.1	146	0	0	0	7	0	0	0	0	4	6	43	0	0	0	0	0	139	0	0	122	0	0	0	0	0	218	0	4	2
Soltu.DM.09G027030.2	2183	1427	1014	1051	1278	1192	1143	1837	284	1027	1269	1010	849	1140	1609	1040	1177	1327	2416	824	926	1217	1421	846	1095	1056	978	1253	1354	847
Soltu.DM.01G002750.1	0	0	5	0	0	14	9	0	2	0	0	0	13	7	0	0	0	4	3	0	3	4	0	0	0	0	15	3	8	0
Soltu.DM.04G027440.1	0	0	0	0	0	0	0	0	0	4	0	0	0	0	0	0	0	0	0	0	0	0	0	0	0	0	0	0	0	0
Soltu.DM.04G013800.1	5	0	0	0	2	2	0	0	0	0	2	0	1	0	0	0	2	0	0	2	0	0	4	0	1	2	0	2	0	3
Soltu.DM.11G020640.1	771	3010	164	1711	553	298	1570	454	6217	165	6567	592	263	7287	208	5782	151	2566	617	1495	134	1033	541	996	311	862	576	1769	332	700
Soltu.DM.03G037120.1	960	352	320	444	393	506	833	1338	174	565	828	712	639	800	407	464	136	733	704	394	145	738	374	581	243	471	619	718	332	408
Soltu.DM.06G028570.1	0	0	0	35	0	0	7	0	24	0	0	0	0	10	0	65	0	3	0	10	0	3	0	1	0	0	0	33	0	4
Soltu.DM.03G037120.2	0	0	0	0	0	0	102	0	0	0	19	0	0	0	0	0	0	0	0	42	0	0	0	0	0	0	0	0	0	40
Soltu.DM.02G005790.1	0	0	0	0	0	0	0	0	0	0	0	0	0	0	0	0	0	0	2	0	0	0	0	0	0	0	0	0	0	0
Soltu.DM.07G013580.1	0	0	0	0	0	0	0	0	0	0	0	0	0	0	0	0	0	0	0	0	0	0	0	0	0	0	0	0	0	0
Soltu.DM.08G020650.1	50	15	22	17	15	25	30	34	15	23	26	30	11	32	30	16	21	23	24	19	16	20	18	22	23	21	27	28	17	21
Soltu.DM.09G001990.1	0	0	0	45	0	0	0	0	69	0	151	0	0	222	0	299	0	8	0	38	0	0	0	15	0	0	0	15	0	5
Soltu.DM.09G009080.1	101	0	33	0	4	22	10	5	19	0	9	0	3	18	9	10	18	18	0	12	16	17	0	25	34	5	0	22	32	23
Soltu.DM.01G021300.1	11	12	6	7	25	8	14	12	7	12	27	17	7	9	7	5	0	19	8	9	2	15	11	22	3	10	5	24	0	18
Soltu.DM.08G005280.2	278	115	133	122	104	220	128	200	11	66	96	191	93	109	114	47	184	143	243	69	188	78	116	55	316	149	174	93	310	39
Soltu.DM.08G005280.3	0	50	39	0	0	0	0	0	0	0	0	0	0	0	32	0	0	0	0	0	0	0	0	0	0	0	0	0	0	0
Soltu.DM.07G024140.1	0	0	0	0	0	0	0	0	0	0	0	0	0	0	0	0	0	0	0	0	0	0	0	0	0	0	0	0	0	0
Soltu.DM.08G009570.1	0	0	0	0	0	0	0	0	0	0	0	0	0	0	0	0	0	0	0	0	0	0	0	0	0	0	0	0	0	0
Soltu.DM.01G029060.1	541	313	174	230	211	222	232	574	61	243	336	374	257	314	434	279	237	382	616	195	198	335	345	205	244	236	484	278	367	272
Soltu.DM.04G031590.1	3641	1292	1867	1223	1599	1990	1359	3723	1615	1912	1517	2790	1908	1446	2064	1291	1557	1761	2175	916	1082	1242	1740	1064	1531	1366	2357	1529	2028	1472
Soltu.DM.05G025290.1	2939	925	1637	852	1061	1893	1000	2961	1301	1407	1347	1961	1831	983	2255	865	1466	1034	2467	639	1162	933	1425	783	1691	929	1949	1003	2118	778
Soltu.DM.04G034490.1	36	513	0	614	548	11	540	41	2759	20	1912	50	13	1149	31	1181	40	848	36	356	21	437	33	257	19	141	72	648	30	246
Soltu.DM.04G034490.3	0	0	0	0	0	0	0	0	2	0	0	0	0	41	0	0	0	0	0	0	0	0	0	0	0	0	0	0	0	0
Soltu.DM.04G034490.2	0	0	0	0	0	0	0	0	0	0	0	0	0	0	0	0	0	0	0	0	0	0	0	0	0	0	0	0	0	0
Soltu.DM.03G017750.1	0	0	0	0	0	0	0	0	0	0	0	0	0	0	0	0	0	0	0	0	0	0	0	0	0	0	0	0	0	0
Soltu.DM.10G009670.1	0	0	0	0	0	0	0	0	0	0	1	0	0	0	0	0	0	0	0	0	0	0	0	0	0	0	0	0	0	0
Soltu.DM.11G019670.1	837	677	447	477	684	462	661	732	209	507	419	515	354	380	474	354	405	540	522	277	314	562	395	302	443	462	454	385	630	416
Soltu.DM.06G009820.1	0	0	0	0	0	0	0	0	0	0	0	0	0	0	0	0	0	0	0	0	0	0	0	0	0	0	0	0	0	0
Soltu.DM.01G017540.1	0	0	0	0	0	0	0	0	0	0	0	0	0	0	0	0	0	0	0	0	0	0	0	0	0	0	0	0	0	0
Soltu.DM.02G015860.3	14	0	19	0	21	20	52	149	0	48	34	26	13	31	22	27	0	46	40	2	13	0	0	18	21	0	3	19	30	0
Soltu.DM.02G015860.2	31	0	169	35	20	53	0	142	0	412	56	26	20	0	129	230	0	191	31	0	15	0	0	60	22	0	0	26	18	0
Soltu.DM.02G015860.1	429	89	0	53	116	247	60	620	92	0	80	276	400	193	328	7	355	3	761	72	265	190	393	0	445	69	517	112	427	71
Soltu.DM.09G000630.1	287	65	83	84	78	86	98	357	114	180	271	221	91	283	243	251	178	206	303	106	131	93	167	58	100	21	265	163	157	49
Soltu.DM.S000920.1	0	0	0	0	0	0	0	0	0	0	0	0	0	0	0	0	0	0	0	0	0	0	0	0	0	0	0	0	0	0
Soltu.DM.04G013490.1	0	0	0	0	0	0	0	0	0	0	0	0	0	0	0	0	0	0	0	0	0	0	0	0	0	0	0	0	0	0
Soltu.DM.08G008430.1	597	365	206	260	283	285	319	695	255	308	416	348	290	354	361	397	228	586	685	274	204	458	303	233	186	209	424	425	305	214
Soltu.DM.10G019170.1	31	22	12	6	13	3	9	28	12	23	13	18	14	32	10	27	5	11	50	11	10	6	23	23	12	15	13	27	19	8
Soltu.DM.06G031610.2	0	16	3	0	2	1	16	26	0	4	0	0	0	0	22	0	1	0	0	2	0	1	1	10	8	12	0	0	0	2
Soltu.DM.11G019920.1	8	19	11	57	13	13	21	18	27	16	47	44	37	40	7	81	17	73	15	30	7	35	9	8	14	12	15	42	0	21
Soltu.DM.04G033360.2	3765	1606	1646	1275	1314	1924	1352	3127	521	1367	2480	2270	1960	2235	2405	1743	1855	1818	3316	1485	1743	1503	1689	1446	2270	1612	2030	1880	2634	1017
Soltu.DM.04G033360.3	0	0	0	0	0	0	0	0	0	2	0	9	0	0	0	0	0	0	4	0	0	0	0	0	0	0	0	0	0	0
Soltu.DM.01G035210.1	1476	334	679	249	310	645	254	1360	244	956	470	1075	392	463	931	464	559	562	1217	305	431	365	718	263	561	216	1013	428	659	316
Soltu.DM.04G033360.1	29	7	3	10	4	10	0	243	8	2	6	7	63	201	68	93	8	3	12	19	126	35	273	12	12	10	11	4	15	126
Soltu.DM.02G015870.1	256	127	89	79	136	212	80	210	8	110	73	150	151	62	142	68	138	92	177	88	96	87	123	63	142	52	165	95	155	77
Soltu.DM.02G007430.1	0	0	0	0	0	0	0	0	0	0	0	0	0	0	0	0	0	0	0	0	0	0	0	0	0	0	0	0	0	0
Soltu.DM.03G033000.1	0	0	0	0	0	0	0	0	0	0	0	0	0	0	0	0	0	0	0	0	0	0	0	0	0	0	0	0	0	0
Soltu.DM.06G016140.1	3	0	0	0	0	5	0	2	0	0	0	9	0	0	0	0	0	0	6	0	0	0	7	0	0	0	9	0	0	0
Soltu.DM.06G031610.1	100	0	0	97	0	0	75	159	0	0	127	111	116	117	67	267	0	119	124	0	0	0	0	0	0	0	132	118	57	0
Soltu.DM.07G023080.1	18909	11978	12143	9167	11771	8688	9890	23272	1021	15009	10956	12726	11190	9351	16877	4543	9371	8844	19081	4746	6456	9946	16162	5513	8941	10112	12329	6941	12118	8789
Soltu.DM.11G003890.2	3989	2901	2180	2257	2835	2203	2165	5175	2048	2289	3536	2940	1905	3472	3658	2881	2481	2735	5424	2566	2426	2827	3495	2903	2048	2407	3026	3428	2957	2651
Soltu.DM.10G020020.1	210	35	78	24	32	54	35	405	95	446	52	283	65	45	84	46	48	57	99	21	20	22	51	31	24	27	68	43	63	28
Soltu.DM.04G023630.1	0	0	0	0	0	0	0	0	0	0	0	0	0	0	0	0	0	0	0	0	0	0	0	0	0	0	0	0	0	0
Soltu.DM.11G000120.1	8	0	1	0	0	5	0	6	7	0	0	4	6	5	4	6	2	6	0	0	0	5	3	5	2	0	8	5	8	0
Soltu.DM.08G010300.1	0	0	0	0	0	0	0	0	0	0	0	0	0	0	5	0	0	0	3	0	4	0	0	0	0	0	0	0	0	0
Soltu.DM.01G038410.1	2023	1227	851	1168	1278	1094	1259	2279	752	1325	1084	1771	1028	978	1222	1047	816	1747	1801	654	570	1452	1080	671	798	1011	1351	980	1128	1024
Soltu.DM.03G007080.1	0	0	0	0	0	0	0	0	0	0	0	0	0	0	0	0	0	0	0	0	0	0	0	0	0	0	0	0	0	0
Soltu.DM.03G027800.1	239	201	82	155	190	153	117	194	24	119	115	134	92	92	98	89	93	208	168	87	63	203	78	81	127	120	77	139	119	102
Soltu.DM.09G007500.1	17	15	5	11	11	8	11	12	5	16	9	12	0	7	4	6	5	12	15	9	7	14	12	6	8	11	7	11	10	6
Soltu.DM.02G022210.2	1590	1219	535	802	1059	845	934	1498	516	617	1271	861	613	1006	1036	926	738	1165	1149	919	423	1162	915	790	644	743	806	1026	907	828
Soltu.DM.12G019300.1	0	0	0	0	0	0	0	0	0	0	0	0	0	0	0	0	0	0	0	0	0	0	0	0	0	0	0	0	0	0
Soltu.DM.10G015210.1	6	2	0	0	0	0	0	0	2	0	0	0	0	0	0	0	0	2	2	0	0	0	0	0	0	0	0	0	0	0
Soltu.DM.02G022210.1	0	24	201	124	23	16	41	11	0	183	12	30	36	26	19	200	39	47	433	70	253	0	84	37	135	167	172	253	0	8
Soltu.DM.10G021160.2	0	0	0	0	0	0	229	9	382	0	0	0	0	0	0	0	0	0	0	0	0	0	0	0	0	0	0	0	0	0
Soltu.DM.10G021160.3	0	0	0	0	0	0	0	0	84	0	264	0	0	0	122	0	249	85	0	0	34	0	0	0	0	0	0	0	0	0
Soltu.DM.10G021160.1	0	0	0	0	0	0	0	0	0	0	1	0	0	0	0	0	0	0	0	0	1	0	0	0	0	0	0	0	0	0
Soltu.DM.09G017850.1	30	20	19	7	11	14	8	30	20	19	18	22	11	23	24	19	16	22	34	11	9	18	9	20	16	14	20	21	21	11
Soltu.DM.10G021160.4	0	0	0	0	0	0	118	0	261	0	0	452	0	0	353	0	0	242	0	0	172	439	0	61	0	0	0	0	0	0
Soltu.DM.04G029730.1	48	14	22	23	15	21	24	41	54	32	62	29	9	58	26	34	18	37	16	13	17	6	19	11	17	3	25	28	21	21
Soltu.DM.04G027130.2	17	12	11	7	4	21	5	17	0	16	3	16	19	8	16	2	12	2	23	12	4	1	11	0	2	2	13	0	19	0
Soltu.DM.12G008850.1	139	131	194	175	99	111	172	191	86	160	163	273	136	211	205	122	143	130	197	102	54	169	93	196	2	94	181	222	147	153
Soltu.DM.04G027130.1	276	175	110	106	159	184	122	159	66	121	102	197	126	72	181	87	154	112	234	89	98	117	180	63	144	97	226	81	155	71
Soltu.DM.02G014090.1	102	176	21	688	1228	8	526	71	1921	192	835	35	13	832	70	1659	14	1616	36	738	0	1618	22	639	0	1055	32	1786	9	715
Soltu.DM.12G007740.1	0	0	0	0	0	0	0	0	0	0	0	0	0	0	0	0	0	0	0	0	0	0	0	0	0	0	0	0	0	0
Soltu.DM.01G030400.1	533	34	259	25	62	247	47	455	93	292	143	492	219	128	178	94	84	51	223	75	75	76	238	98	133	61	412	142	125	49
Soltu.DM.04G020280.1	0	0	0	0	0	0	0	0	0	0	0	0	0	0	0	0	0	0	0	0	0	0	0	0	0	0	0	0	0	0
Soltu.DM.02G025110.1	147	40	97	71	53	88	65	191	153	167	143	198	119	78	98	79	56	61	202	77	65	41	152	85	76	58	171	105	113	63
Soltu.DM.02G025110.2	26	17	13	7	0	12	19	49	1	14	16	26	23	27	32	4	6	0	22	8	3	5	28	9	9	7	40	25	7	5
Soltu.DM.12G002470.1	2	5	0	2	2	9	0	0	3	8	0	0	0	0	5	0	13	0	0	0	5	0	0	0	6	0	0	0	5	0
Soltu.DM.02G023670.1	0	0	0	0	0	0	0	0	0	0	0	0	0	0	0	0	0	0	0	0	0	0	0	0	0	0	0	0	0	0
Soltu.DM.04G029070.1	0	0	0	0	0	0	0	5	0	0	0	0	0	0	5	2	0	0	0	0	0	0	0	0	0	0	0	0	0	0
Soltu.DM.03G016410.1	2159	685	916	423	490	1055	441	2447	701	1305	607	1308	1361	1025	1079	539	1083	548	1418	437	570	352	1717	353	892	492	1522	716	1162	388
Soltu.DM.04G031580.1	13450	6061	6141	5550	6077	4395	4069	10172	2194	27894	3214	7985	3091	2239	10493	3964	6930	11047	3857	3249	4864	7401	3540	2950	3807	4733	2629	5266	6346	5091
Soltu.DM.06G031170.1	0	0	0	0	0	0	0	0	0	0	0	0	0	0	0	3	0	0	0	0	0	0	0	0	0	0	0	0	0	0
Soltu.DM.01G022430.1	303	108	140	83	70	249	83	269	16	133	71	236	195	61	125	44	135	77	114	32	109	63	104	55	166	110	82	51	178	44
Soltu.DM.09G012650.1	0	0	0	0	0	0	0	0	0	0	0	0	0	0	0	0	0	0	0	0	0	0	0	0	0	0	0	0	0	0
Soltu.DM.10G018840.1	297	0	151	0	0	59	11	278	0	369	0	66	74	0	259	0	1029	0	154	0	314	0	79	0	578	0	112	0	580	4
Soltu.DM.02G020180.1	23	47	15	34	53	17	57	21	27	21	39	19	11	44	21	18	23	35	47	22	9	45	38	36	19	30	44	25	36	33
Soltu.DM.02G001850.1	0	0	0	0	0	0	0	0	0	0	0	0	0	0	0	0	0	0	0	0	0	0	0	0	0	0	0	0	0	0
Soltu.DM.07G011240.1	0	0	0	0	0	0	0	0	0	0	0	0	0	0	0	0	0	0	0	0	0	0	0	0	0	0	0	0	0	0
Soltu.DM.11G012950.1	0	0	0	6	0	0	0	0	12	0	0	0	0	0	0	7	0	0	0	0	0	0	0	0	0	0	0	0	0	0
Soltu.DM.08G002420.1	31	36	34	30	8	26	20	43	0	58	9	76	0	0	39	0	9	10	86	0	8	0	11	0	24	0	38	0	29	0
Soltu.DM.08G025800.1	0	0	0	0	0	0	0	0	21	0	0	60	0	0	0	0	0	0	0	0	0	0	0	0	0	0	0	60	0	0
Soltu.DM.03G000780.1	0	0	0	0	0	0	0	0	0	0	0	0	0	0	0	3	0	0	0	0	0	0	0	0	0	0	0	0	0	0
Soltu.DM.11G013580.1	0	0	0	0	0	0	0	0	0	0	0	0	0	0	0	0	0	0	0	0	0	0	0	0	0	0	0	0	0	0
Soltu.DM.04G021650.1	5854	3813	3533	2682	3266	2264	2484	7111	785	4269	3401	3712	2157	3279	4033	2306	2430	3621	3801	2389	1756	3437	3078	2142	1924	2838	2682	2996	2779	3008
Soltu.DM.07G019060.1	78	5	51	6	9	62	15	175	6	55	6	127	56	22	76	17	62	15	156	17	71	18	117	10	86	15	138	12	118	12
Soltu.DM.S002020.1	0	0	0	0	0	0	0	0	0	0	0	0	0	0	0	0	0	0	0	0	0	0	0	0	0	0	0	0	0	0
Soltu.DM.02G026620.2	5	0	0	0	3	0	0	0	5	0	0	0	0	0	0	3	0	0	0	0	0	0	0	0	0	0	0	0	0	0
Soltu.DM.02G026620.1	0	0	0	0	0	0	0	0	0	0	0	0	0	0	0	0	0	0	0	0	0	0	0	0	0	0	0	0	0	0
Soltu.DM.11G017450.1	280	181	91	105	185	118	141	275	156	157	340	179	97	230	229	276	133	213	414	145	137	159	188	195	159	150	237	201	159	97
Soltu.DM.06G023470.2	0	0	0	0	0	0	0	0	0	0	0	0	0	0	0	0	0	5	5	0	2	0	0	0	5	0	0	0	0	0
Soltu.DM.06G033380.2	187	191	119	196	252	155	82	249	126	149	233	44	116	96	237	162	48	303	329	106	134	215	201	141	158	156	155	207	217	32
Soltu.DM.06G033380.3	97	0	0	0	0	0	111	0	0	21	0	0	0	114	0	0	0	0	0	0	7	0	0	0	0	0	33	0	0	149
Soltu.DM.01G032660.1	140	16	72	198	21	70	83	152	157	52	185	48	38	239	221	328	187	177	144	125	139	92	49	61	112	12	75	137	134	58
Soltu.DM.06G033380.1	0	0	0	0	0	0	0	1	0	0	0	118	0	0	0	0	113	2	0	0	0	0	6	0	0	0	0	0	0	15
Soltu.DM.S001860.1	0	2	0	3	2	0	2	0	4	0	1	0	0	0	0	4	0	4	0	4	0	1	0	8	0	1	0	6	0	1
Soltu.DM.12G006150.1	183	122	107	90	84	109	98	135	43	76	58	84	58	91	147	97	102	124	172	57	91	111	113	62	103	58	147	88	134	67
Soltu.DM.02G026630.1	163	74	9	0	2	85	2	0	43	0	0	158	87	0	193	0	74	0	0	3	149	0	17	0	6	0	157	1	53	0
Soltu.DM.02G026630.2	141	46	118	86	146	133	103	371	68	143	84	26	0	0	0	49	0	152	278	99	0	130	129	101	93	1	32	78	107	67
Soltu.DM.02G026630.3	87	60	0	0	0	0	0	0	20	0	25	0	78	139	0	49	109	0	0	0	0	0	17	0	104	118	0	44	51	45
Soltu.DM.11G020360.1	485	553	178	736	544	167	554	726	815	250	2719	379	161	3811	571	2453	130	597	810	3055	129	495	442	2405	170	465	397	2476	147	342
Soltu.DM.03G027460.1	0	0	0	0	0	0	0	0	4	0	0	0	0	0	0	5	0	6	0	0	0	5	0	4	0	3	0	0	0	0
Soltu.DM.12G026850.2	10	0	2	0	0	0	0	0	0	1	0	2	0	4	7	0	0	0	2	0	0	0	0	1	3	0	18	0	5	2
Soltu.DM.04G028470.1	39	8	19	1	1	11	8	23	8	60	22	11	5	17	2	13	3	7	3	21	0	4	8	13	0	7	12	9	1	1
Soltu.DM.11G005210.1	11	10	9	6	0	6	0	58	18	36	47	45	24	37	7	1	0	4	0	0	4	0	7	5	4	0	6	0	5	3
Soltu.DM.11G005210.2	1	0	0	5	0	1	0	3	0	38	24	1	14	16	0	0	0	1	0	0	0	0	1	0	0	0	0	0	0	0
Soltu.DM.01G033540.1	1197	681	723	665	875	740	723	1174	97	753	651	845	578	535	1060	534	779	708	1009	395	530	584	754	481	752	640	1032	642	990	559
Soltu.DM.10G005540.1	0	0	0	0	0	0	0	2	0	0	0	0	0	0	0	0	0	0	0	0	0	0	0	0	0	0	0	0	0	0
Soltu.DM.01G008630.1	0	0	0	0	0	3	0	5	0	0	0	0	0	0	0	0	0	0	0	0	3	0	0	0	0	0	0	0	0	0
Soltu.DM.11G007540.1	771	499	414	348	521	285	385	670	137	373	389	400	190	422	273	348	223	531	355	323	172	541	267	337	233	509	283	568	292	411
Soltu.DM.04G024600.1	0	7	0	0	28	7	0	6	5	17	0	0	5	10	0	14	0	13	11	8	7	0	0	0	0	0	8	0	11	0
Soltu.DM.12G003110.1	46	147	0	183	297	0	255	0	141	0	47	0	0	26	0	70	0	232	0	25	0	265	0	35	0	85	0	136	0	145
Soltu.DM.03G029100.1	10921	5456	4350	3334	4618	3254	4483	9666	3534	5367	6354	4582	3103	6844	7814	5722	7110	6156	7393	4367	3459	5492	5177	5201	2837	4034	5903	6736	4069	4125
Soltu.DM.03G029100.2	4027	1629	961	1167	1339	1166	1651	3918	1726	0	1005	1869	1070	533	2687	2035	295	2413	2492	1235	1300	1873	1306	1540	1385	1452	1595	2592	1461	1126
Soltu.DM.07G024620.1	0	0	0	0	0	0	0	0	0	0	0	0	0	0	0	0	0	0	0	0	0	0	0	0	0	0	0	0	0	0
Soltu.DM.09G013110.1	111	68	35	56	56	65	52	126	59	73	71	59	48	56	99	71	49	88	107	33	64	58	100	30	56	55	86	72	66	52
Soltu.DM.04G009080.1	2405	1269	1168	1256	1474	1108	1338	2717	2385	1854	1656	1663	919	1756	1377	1425	860	1996	1602	1205	656	1630	1202	1194	888	1330	1446	1761	1182	1389
Soltu.DM.07G003130.1	0	0	0	0	0	0	0	0	0	0	0	0	0	0	0	0	0	0	0	0	0	0	0	0	0	0	0	0	0	0
Soltu.DM.12G028090.1	14	199	9	190	218	13	177	0	113	0	138	21	11	179	7	74	3	277	0	66	0	215	0	101	0	212	8	140	0	287
Soltu.DM.03G011140.1	0	0	0	0	0	0	0	0	0	0	0	0	0	0	0	0	0	0	0	0	0	0	0	0	0	0	0	0	0	0
Soltu.DM.06G022890.1	60	25	59	10	21	29	18	105	55	36	50	43	24	86	62	44	25	26	95	76	41	25	56	66	29	10	60	69	43	9
Soltu.DM.03G031670.1	0	0	0	0	0	0	0	0	0	0	0	0	0	0	0	0	0	0	0	0	0	0	0	0	0	0	0	0	0	0
Soltu.DM.04G034080.1	59	0	31	7	0	20	0	119	0	22	28	61	65	24	46	18	23	0	32	5	15	2	44	15	12	0	63	18	30	0
Soltu.DM.06G005350.1	282	215	164	126	156	119	178	390	110	169	213	171	81	229	193	182	138	215	215	136	123	209	119	129	106	163	173	197	143	181
Soltu.DM.04G008880.1	0	0	0	2	0	0	0	0	0	0	0	0	0	0	0	0	0	0	0	0	0	0	0	0	0	0	0	0	0	0
Soltu.DM.09G025080.1	156	123	85	76	118	49	55	185	79	76	139	93	76	110	143	91	75	136	212	121	44	98	147	97	66	110	177	195	70	98
Soltu.DM.08G012120.2	120	34	0	12	0	64	0	73	0	0	0	0	0	0	43	0	0	22	54	0	39	0	0	0	0	11	0	0	34	0
Soltu.DM.05G016610.1	0	0	0	0	0	0	0	0	0	0	0	0	0	0	0	0	0	0	0	0	0	0	0	0	0	0	0	0	0	0
Soltu.DM.09G025890.1	0	0	0	0	0	0	0	0	0	0	0	0	0	0	0	0	0	0	0	0	0	0	0	0	0	0	0	0	0	0
Soltu.DM.09G025890.2	174	0	161	0	0	92	7	1091	13	73	0	0	9	6	88	0	140	0	31	0	50	0	88	0	154	0	134	0	193	0
Soltu.DM.03G012160.1	12	0	0	0	11	8	0	9	8	5	8	8	0	0	0	0	0	0	0	0	0	0	0	0	0	0	5	0	4	0
Soltu.DM.09G023290.2	74	0	14	22	28	7	13	73	27	16	19	17	19	19	25	12	31	26	13	20	0	15	27	0	25	21	44	18	22	10
Soltu.DM.05G009750.1	4929	3729	2700	3786	3846	1973	3699	7157	1897	3556	6428	5436	3125	5061	5696	4356	2493	5532	8138	3358	2580	4627	5419	3857	3305	3839	6063	5091	4314	3912
Soltu.DM.02G029900.1	6	17	3	17	18	6	9	1	55	0	29	0	7	18	4	30	3	62	0	18	0	87	0	31	0	40	0	47	0	31
Soltu.DM.05G009750.2	0	0	0	0	0	0	0	0	0	0	0	0	0	0	0	0	0	0	0	0	0	0	0	0	0	0	0	0	0	0
Soltu.DM.07G023240.1	1207	487	530	331	445	575	481	944	442	526	548	548	328	667	611	539	517	520	752	416	403	527	463	425	456	471	550	551	664	472
Soltu.DM.09G019960.1	4580	3607	2463	2566	2702	2639	2198	4900	3802	2579	2964	3308	2018	2573	4359	2268	2089	2969	5391	2085	1983	2700	3732	1936	2199	2590	2827	2456	2989	2075
Soltu.DM.05G011510.1	0	0	0	0	0	0	0	0	0	0	0	0	0	0	0	0	0	0	0	0	0	0	0	0	0	0	0	0	0	0
Soltu.DM.04G019620.1	0	0	0	0	0	0	0	0	0	0	0	0	0	0	0	0	0	0	0	0	0	0	0	0	0	0	0	0	0	0
Soltu.DM.12G018580.1	0	0	0	0	0	0	0	0	0	0	0	0	0	0	0	0	0	0	0	0	0	0	0	0	0	0	0	0	0	0
Soltu.DM.05G016390.1	0	0	0	0	0	0	0	0	0	0	6	0	0	7	0	3	0	0	0	6	0	0	0	0	0	0	0	0	0	0
Soltu.DM.11G006290.1	0	0	0	0	0	0	0	0	0	0	0	0	0	0	0	0	0	0	0	0	0	0	0	0	0	0	0	0	0	0
Soltu.DM.12G008320.1	0	3	0	42	16	0	27	0	25	0	11	0	0	13	0	35	0	58	0	8	0	29	0	6	0	14	0	18	0	16
Soltu.DM.03G009460.1	0	0	0	0	0	0	0	0	0	0	0	0	0	0	0	0	0	0	0	18	0	0	0	0	0	0	0	0	0	0
Soltu.DM.11G026410.1	53	0	9	0	0	29	0	118	4	7	0	11	46	0	46	0	88	0	63	0	68	0	16	0	115	0	27	0	105	0
Soltu.DM.06G003570.1	61	0	13	0	0	11	0	8	0	0	0	15	11	0	9	0	4	0	8	0	0	0	5	0	0	0	11	0	0	0
Soltu.DM.01G006280.1	0	0	0	0	0	0	0	0	0	0	0	0	0	0	0	0	0	0	0	0	0	0	0	0	0	0	0	0	0	0
Soltu.DM.01G049450.1	13	0	6	0	0	12	0	8	0	7	0	0	6	0	8	0	6	0	8	0	8	0	0	0	13	0	0	0	7	0
Soltu.DM.02G002240.1	1	0	2	0	0	2	0	0	2	1	0	0	2	2	2	2	0	0	1	1	0	0	1	0	0	0	2	0	0	0
Soltu.DM.01G039580.2	3098	2336	1490	1630	1759	1490	1563	3457	2432	1629	2253	1774	1219	2289	2195	2434	1861	2704	2061	1904	1298	2412	1102	1820	1440	1704	1653	2350	1951	1947
Soltu.DM.01G039580.1	0	0	0	0	0	0	0	0	0	0	0	0	0	0	0	0	0	0	0	0	0	0	0	0	0	0	14	0	0	0
Soltu.DM.11G008430.1	0	0	0	0	0	0	0	0	0	0	0	0	0	0	0	0	0	0	0	0	0	0	0	0	0	0	0	0	0	0
Soltu.DM.02G022290.2	488	336	162	130	144	131	225	747	68	102	43	91	26	217	282	206	128	359	496	192	266	355	257	11	101	101	192	31	83	98
Soltu.DM.08G025390.1	1177	530	753	389	394	912	377	1230	289	667	359	856	1095	368	766	170	743	372	697	199	553	325	398	163	985	533	707	206	1220	400
Soltu.DM.08G025390.2	258	98	27	58	44	106	58	297	11	55	32	40	108	3	128	10	129	186	104	4	83	179	85	42	18	27	82	39	51	40
Soltu.DM.02G022290.1	8179	6353	4138	5948	7948	4740	6495	8650	680	5721	6333	6578	4109	4928	7364	4012	5737	6493	10545	3564	4514	6401	7742	3833	5592	5712	7174	5320	7165	5034
Soltu.DM.04G016460.1	0	0	0	0	0	0	0	0	0	0	0	0	0	0	0	0	0	0	0	0	0	0	0	0	0	0	0	0	0	0
Soltu.DM.10G013080.1	255	124	140	108	123	146	0	210	116	115	241	213	0	234	690	134	678	127	478	296	320	51	330	350	486	227	559	316	263	115
Soltu.DM.02G013790.1	1109	250	626	169	143	647	201	1276	306	513	297	868	772	269	510	182	378	185	559	167	337	208	365	229	535	211	554	258	635	166
Soltu.DM.03G002160.1	2684	1627	1171	1593	1801	1386	1485	2604	1718	1374	1584	1557	1118	1575	1677	1699	1321	2079	1957	1107	1166	1779	1207	980	1223	1333	1585	1752	1868	1457
Soltu.DM.10G013080.2	50	0	12	0	0	0	0	47	0	47	71	82	0	195	446	207	0	165	490	126	27	110	23	59	0	0	353	143	0	0
Soltu.DM.10G019030.1	0	29	0	19	25	0	0	0	0	0	0	0	0	0	0	0	0	21	0	0	0	0	0	0	0	0	0	24	0	0
Soltu.DM.03G008950.1	100	89	56	46	76	62	47	114	61	72	81	57	35	67	67	38	58	88	104	24	49	48	80	31	44	41	96	35	52	51
Soltu.DM.07G028630.1	431	401	229	268	361	181	197	961	111	602	495	599	376	372	619	315	327	378	434	287	106	366	314	337	268	277	318	317	403	215
Soltu.DM.01G039590.1	0	0	0	15	0	0	0	0	25	0	9	0	0	8	0	58	5	0	0	0	0	0	0	0	0	0	0	0	0	0
Soltu.DM.07G028630.2	210	27	61	111	105	116	93	120	28	23	67	193	17	117	39	139	63	111	203	110	123	38	118	29	65	45	94	192	51	80
Soltu.DM.07G007890.2	276	198	672	212	201	359	220	433	140	817	311	248	465	166	359	191	115	354	143	129	321	176	795	209	523	315	646	350	592	227
Soltu.DM.07G007890.3	1137	401	369	133	185	553	125	1256	475	416	261	758	315	332	619	214	418	205	981	210	396	263	433	218	330	230	394	286	462	129
Soltu.DM.07G007890.1	372	23	43	38	11	12	23	426	167	64	169	158	219	246	274	96	262	31	143	130	8	53	42	22	21	6	88	10	65	79
Soltu.DM.07G000870.1	11	3	6	4	8	5	7	3	6	2	4	5	0	5	2	3	8	3	3	2	0	6	0	6	0	6	3	7	0	3
Soltu.DM.05G012770.1	0	0	0	0	0	0	0	0	0	0	0	4	0	0	0	0	0	0	0	0	0	4	4	0	0	0	5	4	0	0
Soltu.DM.07G024390.1	0	0	0	0	0	0	0	0	9	0	0	0	0	0	0	7	0	0	0	0	0	0	0	0	0	0	0	0	0	0
Soltu.DM.03G013720.1	0	0	0	0	0	0	0	0	0	0	0	0	0	0	0	0	0	0	0	0	0	0	0	0	0	0	0	0	0	0
Soltu.DM.09G008950.1	0	0	0	0	0	0	0	0	0	0	0	0	0	0	0	0	0	0	0	0	0	0	0	0	0	0	0	0	0	0
Soltu.DM.06G022370.1	56	57	36	102	126	31	104	62	142	26	105	28	24	97	93	213	59	150	165	92	49	120	68	63	30	65	86	187	68	46
Soltu.DM.12G014690.1	0	0	0	0	0	0	0	0	3	0	0	0	0	0	0	0	0	0	0	0	0	0	0	0	0	0	0	0	0	0
Soltu.DM.09G003350.2	15	46	71	28	44	36	9	3	7	70	11	66	34	30	65	27	42	25	5	16	10	11	24	5	4	11	9	30	25	10
Soltu.DM.09G003350.1	717	242	323	353	277	374	327	647	968	265	238	394	334	261	388	487	389	520	404	195	296	353	237	161	478	274	439	306	575	293
Soltu.DM.12G011210.1	83	77	42	49	54	32	52	77	23	60	37	40	23	37	51	26	37	64	78	33	38	58	55	26	27	47	25	26	36	44
Soltu.DM.04G007470.1	44	0	0	22	19	8	9	6	114	3	22	0	9	6	0	40	3	24	0	11	0	14	0	11	0	0	0	32	0	13
Soltu.DM.05G015000.1	8	8	0	0	5	3	0	3	3	0	0	2	0	2	0	0	0	1	0	4	0	2	0	0	0	0	0	0	5	5
Soltu.DM.08G027830.2	84	87	202	37	69	194	25	17	19	168	91	330	240	42	247	17	88	62	101	220	31	57	44	59	518	13	114	30	77	14
Soltu.DM.08G027830.1	1260	331	423	238	257	481	239	1124	108	700	295	416	337	304	699	252	421	260	888	0	320	260	653	171	0	276	660	306	607	238
Soltu.DM.06G018840.1	6533	3712	3290	2877	3594	4973	5580	6963	1337	4044	4141	2958	2189	4387	4173	3831	2217	5377	5938	3610	2108	4795	2904	3514	2021	3725	5571	5281	3053	4073
Soltu.DM.02G031150.1	378	282	217	277	323	186	214	503	472	266	342	324	203	255	337	298	221	359	417	170	180	279	277	194	222	223	407	287	298	227
Soltu.DM.03G033440.1	160	130	61	82	84	50	59	71	17	49	203	64	19	115	38	153	79	82	136	133	49	202	53	34	113	104	98	62	36	115
Soltu.DM.02G012170.1	0	62	0	25	0	0	7	0	23	0	14	0	0	10	0	0	0	0	0	0	0	3	0	0	0	0	0	0	0	0
Soltu.DM.12G010710.1	2466	925	1064	756	873	1460	778	1475	332	1036	692	932	888	587	1418	841	1272	1206	1155	429	1001	944	819	390	1371	655	833	660	1637	611
Soltu.DM.05G010650.1	0	0	0	0	0	0	0	0	0	0	0	0	0	0	0	0	0	0	0	0	0	0	0	0	0	0	0	0	0	0
Soltu.DM.04G007840.1	33	2	14	0	0	36	5	2	0	0	0	6	0	0	3	0	11	0	0	0	12	0	0	0	14	0	2	0	21	0
Soltu.DM.03G032060.1	115	269	86	274	375	72	295	187	198	202	525	138	82	326	137	367	95	534	136	317	75	332	90	337	84	311	107	424	136	295
Soltu.DM.08G002690.5	130	3	131	11	6	74	86	169	80	2	82	38	26	146	11	46	92	68	134	13	40	18	23	94	108	80	2	93	122	96
Soltu.DM.03G021590.2	79	29	28	0	2	78	0	40	9	0	0	1	33	1	0	0	41	0	0	1	29	1	0	0	42	16	22	0	46	59
[truncated: 51,000 more rows]

## Sheet: DEGs_-N_CLE4oe_control_leaf
Differentially expressed genes (DEGs) in WT relative to StCLE4oe in leaves from nitrogen-free media grown plants.
GID	baseMean	log2FoldChange	lfcSE	stat	pvalue	padj	Annotation
Soltu.DM.08G001210.1	328.751	2.51545	0.526906	4.774	1.80603e-06	0.000120059	nitrate transporter 1.5
Soltu.DM.06G029660.1	360.483	2.49767	0.470055	5.31356	1.07504e-07	1.11956e-05	Pollen Ole e 1 allergen and extensin family protein
Soltu.DM.04G035920.1	394.262	1.99963	0.661083	3.02478	0.00248816	0.0347293	cytokinin oxidase
Soltu.DM.01G031970.1	117.231	1.94059	0.305268	6.357	2.0573e-10	4.32204e-08	glutathione S-transferase zeta
Soltu.DM.02G030160.1	279.364	1.93271	0.317662	6.08417	1.17093e-09	2.12016e-07	Methylenetetrahydrofolate reductase family protein
Soltu.DM.10G024900.1	165.359	1.71023	0.280799	6.09057	1.1251e-09	2.0485e-07	growth-regulating factor
Soltu.DM.04G005140.2	105.213	1.39004	0.388852	3.57472	0.000350601	0.00810313	GRAM domain-containing protein / ABA-responsive protein-related
Soltu.DM.12G023110.1	1626.92	1.32459	0.20348	6.5097	7.53035e-11	1.8014e-08	B-box type zinc finger family protein
Soltu.DM.04G035520.1	159.403	1.19983	0.214022	5.60611	2.06922e-08	2.66986e-06	homeobox protein
Soltu.DM.11G000840.1	27.9358	8.19985	1.21927	6.72522	1.75332e-11	5.08511e-09	Protein of unknown function (DUF506)
Soltu.DM.11G000850.1	23.0806	7.92553	1.20978	6.55123	5.70654e-11	1.39567e-08	Protein of unknown function (DUF506)
Soltu.DM.11G000830.1	17.2753	7.50644	1.16928	6.41972	1.36523e-10	3.02316e-08	Protein of unknown function (DUF506)
Soltu.DM.11G000810.1	8.82358	6.5368	1.43186	4.56524	4.98926e-06	0.000276672	Protein of unknown function (DUF506)
Soltu.DM.06G013460.1	271.888	1.60066	0.367508	4.35545	1.32796e-05	0.000627109	heat shock protein 90.1
Soltu.DM.12G004310.1	229.923	1.35933	0.342062	3.97393	7.06951e-05	0.00232153	growth-regulating factor
Soltu.DM.06G006550.1	83.1008	1.16909	0.287133	4.0716	4.66918e-05	0.00170026	heat shock protein 81-2
Soltu.DM.02G012280.1	2195.8	1.02932	0.317744	3.23947	0.00119753	0.0203496	ARGONAUTE
Soltu.DM.04G007590.2	55.0463	-9.29183	3.14567	-2.95384	0.00313842	0.0408805	RNA-binding (RRM/RBD/RNP motifs) family protein
Soltu.DM.06G019440.1	405.986	-2.14978	0.710549	-3.02552	0.00248205	0.0347066	Bifunctional inhibitor/lipid-transfer protein/seed storage 2S albumin superfamily protein
Soltu.DM.08G003470.6	292.203	-11.6995	3.34462	-3.498	0.000468759	0.0100805	S-adenosyl-L-methionine-dependent methyltransferases superfamily protein
Soltu.DM.02G027190.1	579.252	-1.79734	0.600324	-2.99396	0.00275385	0.0374263	xyloglucan endotransglucosylase/hydrolase
Soltu.DM.01G039330.1	852.499	-1.65598	0.533472	-3.10415	0.00190826	0.0286483	xyloglucan endotransglucosylase/hydrolase
Soltu.DM.04G034770.1	94.9626	-1.56547	0.417836	-3.74662	0.000179234	0.00481991	inositol polyphosphate 5-phosphatase
Soltu.DM.01G043360.1	159.871	-1.40255	0.430788	-3.25577	0.00113086	0.019537	plantacyanin
Soltu.DM.04G037630.1	573.074	-1.32922	0.310345	-4.28305	1.84348e-05	0.000819761	BTB/POZ domain-containing protein
Soltu.DM.10G018520.1	122.587	-1.17137	0.407382	-2.87536	0.00403562	0.0487682	Glycosyl hydrolase superfamily protein
Soltu.DM.03G032520.1	412.003	-1.14162	0.332402	-3.43445	0.000593755	0.0122154	GDP-D-mannose 4,6-dehydratase
Soltu.DM.09G025660.6	18.2346	7.58595	2.24985	3.37176	0.000746906	0.0144075	F-box and associated interaction domains-containing protein
Soltu.DM.01G002520.4	33.7958	4.87618	1.42072	3.4322	0.000598711	0.0122788	TPX2 (targeting protein for Xklp2) protein family
Soltu.DM.08G001530.1	2776.48	4.25627	0.767416	5.54624	2.91885e-08	3.54295e-06	Acyl transferase/acyl hydrolase/lysophospholipase superfamily protein
Soltu.DM.08G001530.2	1294.97	3.92577	0.851162	4.61225	3.98331e-06	0.000228226	Acyl transferase/acyl hydrolase/lysophospholipase superfamily protein
Soltu.DM.05G006590.1	1966.55	-3.9165	0.620958	-6.30718	2.84162e-10	5.85713e-08	thioredoxin
Soltu.DM.11G004650.1	319.993	-2.55865	0.51829	-4.93671	7.94523e-07	6.18501e-05	terpene synthase
Soltu.DM.06G027980.1	911.067	-2.46217	0.592532	-4.15534	3.24804e-05	0.00129499	SAUR-like auxin-responsive protein family
Soltu.DM.07G027350.1	54.1171	-2.33499	0.563026	-4.14721	3.36548e-05	0.00132581	hypothetical protein
Soltu.DM.10G002840.1	90.1595	-2.26904	0.465706	-4.87226	1.10327e-06	8.03499e-05	Protein of unknown function (DUF640)
Soltu.DM.11G004660.1	183.176	-2.16331	0.535629	-4.03883	5.37191e-05	0.00189253	terpene synthase
Soltu.DM.11G016990.1	398.966	-2.1337	0.421395	-5.06342	4.11806e-07	3.55161e-05	AGD2-like defense response protein
Soltu.DM.02G019390.1	615.384	-2.09568	0.44752	-4.68287	2.82886e-06	0.000172645	Terpenoid cyclases/Protein prenyltransferases superfamily protein
Soltu.DM.02G019030.1	191.937	-2.09258	0.372057	-5.62435	1.86213e-08	2.42172e-06	Peroxidase superfamily protein
Soltu.DM.12G019120.1	160.544	-1.959	0.269992	-7.25577	3.99384e-13	1.65684e-10	Protein of unknown function, DUF593
Soltu.DM.10G000440.1	552.489	-1.82148	0.52422	-3.47464	0.000511536	0.0108579	gibberellin 2-oxidase
Soltu.DM.03G013870.1	103.567	-1.79108	0.441136	-4.06015	4.90407e-05	0.00176423	Nucleotide-diphospho-sugar transferase family protein
Soltu.DM.04G025130.1	34.6785	-1.76915	0.610705	-2.89689	0.00376876	0.0464337	cytochrome P450, family 71, subfamily B, polypeptide
Soltu.DM.02G032640.1	929.469	-1.68401	0.382162	-4.40653	1.05039e-05	0.000517663	Peroxidase superfamily protein
Soltu.DM.07G018410.1	443.148	-1.63057	0.316554	-5.15101	2.59092e-07	2.37185e-05	GRAS family transcription factor
Soltu.DM.02G019400.2	728.001	-1.51197	0.434322	-3.48122	0.000499141	0.0106292	terpene synthase-like sequence-1,8-cineole
Soltu.DM.07G015990.1	189.408	-1.45301	0.485729	-2.99141	0.00277691	0.0376376	zinc-dependent activator protein-1
Soltu.DM.09G024190.1	142.191	-1.42531	0.467468	-3.049	0.00229606	0.0327596	PLAT/LH2 domain-containing lipoxygenase family protein
Soltu.DM.05G024850.1	49.4354	-1.41134	0.486716	-2.89972	0.00373493	0.046208	hypothetical protein
Soltu.DM.12G010880.2	859.449	-1.31864	0.456437	-2.88898	0.00386499	0.0473252	alpha/beta-Hydrolases superfamily protein
Soltu.DM.03G011420.1	765.76	-1.31734	0.322146	-4.08928	4.3272e-05	0.00160958	Transmembrane amino acid transporter family protein
Soltu.DM.02G028660.1	172.999	-1.29071	0.329901	-3.91243	9.13706e-05	0.00287103	Nucleoporin autopeptidase
Soltu.DM.05G022280.1	1060.47	-1.2856	0.395191	-3.2531	0.00114153	0.0196488	Chalcone-flavanone isomerase family protein
Soltu.DM.05G006080.1	102.019	-1.2667	0.351425	-3.60447	0.000312793	0.00739623	Regulator of chromosome condensation (RCC1) family with FYVE zinc finger domain
Soltu.DM.02G023850.1	2158.13	-1.2476	0.399265	-3.12473	0.00177967	0.0272039	flavanone 3-hydroxylase
Soltu.DM.03G019640.1	563.873	-1.1991	0.405561	-2.95664	0.00311014	0.0406802	phosphate transporter 3
Soltu.DM.03G011980.1	336.069	-1.12289	0.382771	-2.93359	0.00335069	0.0427617	UDP-glucosyl transferase 85A7
Soltu.DM.02G014530.1	85.1433	-1.08985	0.32823	-3.32037	0.000898981	0.0166096	2-oxoglutarate (2OG) and Fe(II)-dependent oxygenase superfamily protein
Soltu.DM.10G020840.1	546.118	-1.0141	0.321474	-3.15452	0.00160763	0.0251729	myb domain protein
Soltu.DM.04G026400.1	10.5494	-6.91725	1.24028	-5.57719	2.44438e-08	3.08114e-06	hypothetical protein
Soltu.DM.09G029830.1	49.3247	-5.20199	1.76503	-2.94726	0.00320601	0.0414644	Terpenoid cyclases/Protein prenyltransferases superfamily protein
Soltu.DM.09G007700.1	1542.7	-4.20098	0.647759	-6.4854	8.84983e-11	2.05773e-08	MLP-like protein
Soltu.DM.07G003670.1	1420.45	-3.85782	0.407026	-9.47806	2.59065e-21	4.99432e-18	hemoglobin
Soltu.DM.10G008120.1	569.042	-3.52863	0.65595	-5.37941	7.47286e-08	8.32013e-06	dehydroquinate dehydratase, putative / shikimate dehydrogenase, putative
Soltu.DM.09G030480.1	340.357	-3.1063	0.918417	-3.38223	0.000719003	0.0140428	hypothetical protein
Soltu.DM.09G030470.1	869.329	-2.83913	0.879659	-3.22754	0.00124861	0.020985	Glycine rich protein family domain containing protein
Soltu.DM.11G002050.1	613.088	-2.82047	0.464182	-6.07623	1.2304e-09	2.19151e-07	elicitor-activated gene 3-2
Soltu.DM.06G017120.1	360.897	-2.66615	0.819262	-3.25433	0.00113659	0.0195844	terpene synthase
Soltu.DM.01G024170.1	33.299	-2.58107	0.651482	-3.96185	7.43724e-05	0.00241328	Eukaryotic aspartyl protease family protein
Soltu.DM.11G002220.1	63.0483	-2.55828	0.54508	-4.69341	2.68688e-06	0.000165521	elicitor-activated gene 3-1
Soltu.DM.11G002260.1	1922.08	-2.51848	0.473784	-5.31567	1.06265e-07	1.11569e-05	elicitor-activated gene 3-2
Soltu.DM.02G022920.1	7810.2	-2.50056	0.650596	-3.8435	0.000121294	0.00359224	Chitinase family protein
Soltu.DM.01G044680.2	96.1755	-2.42096	0.224135	-10.8014	3.3912e-27	1.1114e-23	hypothetical protein
Soltu.DM.06G017230.1	220.367	-2.36678	0.53512	-4.4229	9.73865e-06	0.000487275	terpene synthase
Soltu.DM.09G029800.1	112.324	-2.30654	0.476187	-4.84378	1.27394e-06	9.07624e-05	UDP-glucosyl transferase 75B2
Soltu.DM.08G025480.1	38.7069	-2.30601	0.560256	-4.116	3.855e-05	0.00147249	Bifunctional inhibitor/lipid-transfer protein/seed storage 2S albumin superfamily protein
Soltu.DM.10G017910.2	5850.95	-2.20883	0.638366	-3.46013	0.000539912	0.0113499	basic chitinase
Soltu.DM.09G029850.1	81.8476	-2.15252	0.476439	-4.51794	6.2443e-06	0.000333841	UDP-Glycosyltransferase superfamily protein
Soltu.DM.09G029900.1	149.409	-2.11973	0.476548	-4.44809	8.6637e-06	0.000442731	UDP-glucosyl transferase 75B2
Soltu.DM.06G017100.1	47.2239	-2.08986	0.627876	-3.32846	0.000873278	0.0162613	terpene synthase
Soltu.DM.07G002220.1	201.225	-2.08351	0.423297	-4.9221	8.56226e-07	6.55633e-05	cytochrome P450, family 94, subfamily B, polypeptide
Soltu.DM.01G024190.1	99.6406	-1.88823	0.536426	-3.52002	0.000431522	0.009517	Eukaryotic aspartyl protease family protein
Soltu.DM.08G027270.1	690.451	-1.80285	0.473509	-3.80742	0.000140423	0.00402279	osmotin
Soltu.DM.10G017920.1	312.434	-1.78115	0.45095	-3.94977	7.82257e-05	0.00251589	basic chitinase
Soltu.DM.04G008860.1	1155.31	-1.74483	0.341881	-5.10361	3.33226e-07	2.99201e-05	glutamine synthase clone F11
Soltu.DM.11G017160.1	157.101	-1.66035	0.364338	-4.55718	5.18448e-06	0.000286046	conserved hypothetical protein
Soltu.DM.09G029810.1	767.396	-1.60456	0.17944	-8.94203	3.82102e-19	5.6921e-16	indole-3-acetate beta-D-glucosyltransferase
Soltu.DM.09G029950.1	1519.14	-1.59302	0.179616	-8.86903	7.37832e-19	1.05135e-15	indole-3-acetate beta-D-glucosyltransferase
Soltu.DM.09G029910.1	392.503	-1.5289	0.196686	-7.77331	7.64624e-15	5.44761e-12	UDP-Glycosyltransferase superfamily protein
Soltu.DM.08G027280.1	2978.49	-1.50182	0.483216	-3.10797	0.00188376	0.0283455	osmotin
Soltu.DM.02G021730.3	48.2351	8.98846	2.25195	3.99142	6.56794e-05	0.0021942	DNA topoisomerase, type IA, core
Soltu.DM.01G009200.3	45.3917	8.90126	2.12407	4.19066	2.78142e-05	0.0011418	UDP-galactose transporter
Soltu.DM.09G023870.2	41.0953	8.75765	2.17687	4.02305	5.74499e-05	0.00198818	galacturonosyltransferase-like
Soltu.DM.01G002940.1	24.6117	8.01776	2.46185	3.25681	0.00112672	0.0195066	ARM repeat superfamily protein
Soltu.DM.08G012880.2	23.7353	7.96524	2.25148	3.53778	0.00040351	0.00903804	Cyclophilin-like peptidyl-prolyl cis-trans isomerase family protein
Soltu.DM.02G024690.2	14.5724	7.25732	1.27548	5.68988	1.27128e-08	1.72878e-06	hypothetical protein
Soltu.DM.01G035350.1	13.3775	7.1379	2.30319	3.09913	0.00194089	0.0289718	Pentatricopeptide repeat (PPR-like) superfamily protein
Soltu.DM.09G022800.1	12.2707	7.01381	2.31904	3.02444	0.00249092	0.0347421	Tetratricopeptide repeat (TPR)-like superfamily protein
Soltu.DM.04G005670.2	10.344	6.76769	2.35119	2.87841	0.00399687	0.048407	Pentatricopeptide repeat (PPR) superfamily protein
Soltu.DM.12G001160.1	342.401	6.14892	0.666028	9.23221	2.65098e-20	4.13717e-17	calcium-dependent protein kinase
Soltu.DM.12G002980.1	25.6188	5.92996	1.35598	4.3732	1.2244e-05	0.000586654	hypothetical protein
Soltu.DM.03G028960.1	23.6391	5.81674	1.24823	4.65998	3.16247e-06	0.000188786	AGAMOUS-like
Soltu.DM.01G002000.1	4.89288	5.6929	1.6141	3.52698	0.000420335	0.00931416	Major facilitator superfamily protein
Soltu.DM.12G001170.1	132.471	4.79387	0.788825	6.07723	1.2228e-09	2.18988e-07	RPM1-interacting protein 4 (RIN4) family protein
Soltu.DM.04G005100.1	12.9195	4.61525	1.36256	3.3872	0.000706098	0.0138706	GRAM domain-containing protein / ABA-responsive protein-related
Soltu.DM.02G013890.1	26.595	3.50454	1.02474	3.41993	0.000626367	0.012712	DUF1084 domain containing protein
Soltu.DM.08G027530.1	14.9551	3.27698	1.12478	2.91343	0.00357477	0.0447673	Protein of Unknown Function (DUF239)
Soltu.DM.09G029160.2	82.9535	23.4829	3.15629	7.44002	1.00673e-13	5.59213e-11	Ribosomal protein L13 family protein
Soltu.DM.06G023320.1	78.8332	23.4137	3.15369	7.4242	1.13461e-13	6.09581e-11	Coatomer, beta' subunit
Soltu.DM.09G012240.2	64.3419	23.1332	3.2349	7.15113	8.60666e-13	3.39839e-10	Double Clp-N motif-containing P-loop nucleoside triphosphate hydrolases superfamily protein
Soltu.DM.10G012850.3	61.3326	23.0672	3.20156	7.20501	5.80401e-13	2.34833e-10	Disease resistance protein (CC-NBS-LRR class) family
Soltu.DM.01G040980.1	263.294	2.50616	0.375649	6.67154	2.53133e-11	6.79995e-09	terpene synthase
Soltu.DM.03G024100.1	47.3045	2.4916	0.817882	3.04641	0.00231595	0.0329144	AGAMOUS-like
Soltu.DM.10G008880.1	77.5002	2.383	0.574606	4.14719	3.3658e-05	0.00132581	squamosa promoter binding protein-like
Soltu.DM.02G020080.2	168.207	2.27984	0.478514	4.76441	1.89405e-06	0.000125148	MATE efflux family protein
Soltu.DM.06G015890.1	40.0556	2.14737	0.627504	3.42209	0.000621426	0.0126418	hypothetical protein
Soltu.DM.08G022450.1	343.91	1.99638	0.505038	3.95294	7.7196e-05	0.0024901	trehalose phosphatase/synthase
Soltu.DM.06G012170.3	203.207	1.98148	0.478705	4.13926	3.48435e-05	0.00136268	Fe superoxide dismutase
Soltu.DM.03G018350.1	225.9	1.97372	0.631262	3.12662	0.00176829	0.0271114	ferric reduction oxidase
Soltu.DM.02G023510.1	64.0245	1.96502	0.378379	5.19325	2.06657e-07	1.93508e-05	farnesylated protein
Soltu.DM.01G037840.2	520.031	1.89575	0.421579	4.49679	6.89874e-06	0.000364078	histidine-containing phosphotransmitter
Soltu.DM.05G019670.1	373.066	1.78196	0.364845	4.88414	1.03879e-06	7.69978e-05	1-amino-cyclopropane-1-carboxylate synthase
Soltu.DM.07G014030.1	33.392	1.73613	0.4548	3.81736	0.00013489	0.00389823	zinc transporter 5 precursor
Soltu.DM.06G025430.2	3061.99	1.71375	0.245832	6.97125	3.14146e-12	1.14395e-09	StAGL8 (POTM1-1)
Soltu.DM.04G005140.1	47.7779	1.67676	0.389445	4.30551	1.66604e-05	0.000755203	GRAM domain-containing protein / ABA-responsive protein-related
Soltu.DM.11G009720.1	39.2158	1.67162	0.34864	4.79468	1.62933e-06	0.000110327	beta-galactosidase
Soltu.DM.10G000190.2	3385.49	1.58504	0.196597	8.06236	7.48326e-16	5.98168e-13	RNA-binding (RRM/RBD/RNP motifs) family protein
Soltu.DM.04G005130.2	30.7887	1.57065	0.529685	2.96525	0.00302433	0.0398699	GRAM domain-containing protein / ABA-responsive protein-related
Soltu.DM.03G036510.2	122	1.54541	0.403714	3.82798	0.000129199	0.00376711	RNA-binding (RRM/RBD/RNP motifs) family protein
Soltu.DM.02G005680.1	29.8149	1.50929	0.445335	3.38912	0.000701168	0.0138251	StFD2
Soltu.DM.04G005080.1	65.8645	1.47996	0.319908	4.62619	3.72445e-06	0.000216421	GRAM domain-containing protein / ABA-responsive protein-related
Soltu.DM.05G005540.1	1394.85	1.45486	0.173132	8.40314	4.34685e-17	4.59546e-14	RNA-dependent RNA polymerase
Soltu.DM.12G020410.1	55.2906	1.41009	0.477521	2.95293	0.00314769	0.0409542	DUF4228 domain containing protein
Soltu.DM.02G008420.1	168.268	1.38888	0.454621	3.05504	0.00225029	0.0322729	cytochrome P450, family 76, subfamily C, polypeptide
Soltu.DM.06G030480.1	542.999	1.33419	0.308809	4.32043	1.55727e-05	0.000715797	Putative lysine decarboxylase family protein
Soltu.DM.06G030470.1	1176.94	1.32452	0.369421	3.5854	0.000336559	0.00785616	lysine decarboxylase family protein
Soltu.DM.02G031030.1	382.973	1.29386	0.335243	3.85948	0.000113631	0.00340789	acyl-CoA synthetase
Soltu.DM.12G007810.1	651.015	1.28763	0.313931	4.10164	4.10227e-05	0.00154179	phloem protein 2-A13
Soltu.DM.09G009260.1	110.112	1.28725	0.321702	4.00136	6.29786e-05	0.00212345	wall associated kinase
Soltu.DM.12G019100.4	130.396	1.25829	0.403681	3.11703	0.00182682	0.027692	conserved hypothetical protein
Soltu.DM.01G031400.1	106.458	1.2337	0.336563	3.6656	0.00024676	0.00616861	GATA transcription factor
Soltu.DM.01G008080.1	74.6276	1.22502	0.24832	4.93325	8.08721e-07	6.23628e-05	gag-polypeptide of LTR copia-type domain containing protein
Soltu.DM.08G021750.1	207.843	1.19539	0.310007	3.85602	0.00011525	0.0034384	Tudor/PWWP/MBT superfamily protein
Soltu.DM.01G008120.1	264.46	1.19359	0.210471	5.67105	1.41929e-08	1.92208e-06	gag-polypeptide of LTR copia-type domain containing protein
Soltu.DM.06G005480.1	543.249	1.13534	0.324811	3.49537	0.000473397	0.0101669	zinc finger (C3HC4-type RING finger) family protein
Soltu.DM.02G017630.1	4050.95	1.13351	0.340985	3.32422	0.000886661	0.0164358	phosphate
Soltu.DM.06G032150.1	3576.59	1.0941	0.318483	3.43536	0.000591774	0.0121976	Tetratricopeptide repeat (TPR)-like superfamily protein
Soltu.DM.03G029900.1	825.225	1.0861	0.169156	6.4207	1.35649e-10	3.02316e-08	CCT motif -containing response regulator protein
Soltu.DM.08G001470.1	603.388	1.07979	0.323803	3.33471	0.000853889	0.0159737	Phototropic-responsive NPH3 family protein
Soltu.DM.07G024010.1	50.1608	1.07897	0.287824	3.74872	0.000177741	0.00479038	NAC (No Apical Meristem) domain transcriptional regulator superfamily protein
Soltu.DM.03G028990.1	69.3004	1.06753	0.299143	3.56862	0.000358862	0.00824754	Squamosa promoter-binding protein-like (SBP domain) transcription factor family protein
Soltu.DM.01G038050.3	87.8442	1.05937	0.27582	3.8408	0.000122636	0.00360785	Major facilitator superfamily protein
Soltu.DM.12G021440.1	137.881	1.0517	0.30756	3.4195	0.000627353	0.0127151	conserved hypothetical protein
Soltu.DM.09G000890.1	31.3256	1.03347	0.322574	3.20382	0.00135617	0.0222897	hypothetical protein
Soltu.DM.06G005490.1	61.0251	1.00883	0.240278	4.19857	2.68605e-05	0.00111149	hypothetical protein
Soltu.DM.03G024050.1	214.243	-2.94145	0.547778	-5.36979	7.88282e-08	8.66925e-06	reversibly glycosylated polypeptide
Soltu.DM.12G015620.1	31.8165	-2.22266	0.649203	-3.42368	0.000617792	0.0125835	pleiotropic drug resistance
Soltu.DM.08G004770.1	170.644	-2.15983	0.482262	-4.47854	7.5154e-06	0.000389719	Calcium-binding EF-hand family protein
Soltu.DM.10G019440.1	94.7537	-2.08369	0.724737	-2.8751	0.004039	0.0487793	Thiamine pyrophosphate dependent pyruvate decarboxylase family protein
Soltu.DM.04G033210.1	1393.12	-2.05676	0.482883	-4.25933	2.0504e-05	0.000891218	N-terminal nucleophile aminohydrolases (Ntn hydrolases) superfamily protein
Soltu.DM.03G011690.1	73.094	-1.75582	0.587644	-2.98789	0.00280909	0.0378601	receptor-like protein kinase
Soltu.DM.01G013680.1	50.7043	-1.18405	0.407294	-2.90712	0.00364772	0.0455242	phosphate starvation-induced gene
Soltu.DM.02G027770.7	5.56179	5.11215	1.27347	4.01435	5.96093e-05	0.00203922	Phototropic-responsive NPH3 family protein
Soltu.DM.04G037270.1	3225.05	4.30627	0.459879	9.36391	7.68385e-21	1.39902e-17	Prolyl oligopeptidase family protein
Soltu.DM.09G009070.2	1604.67	1.62757	0.543297	2.99572	0.00273797	0.0373415	ferritin
Soltu.DM.03G027120.5	69.3745	-9.62498	2.11019	-4.56118	5.08667e-06	0.000281597	SPFH/Band 7/PHB domain-containing membrane-associated protein family
Soltu.DM.05G005560.1	68.1485	-9.59902	2.16834	-4.42689	9.56008e-06	0.000479805	RNA-dependent RNA polymerase
Soltu.DM.03G037440.4	154.754	-9.3057	1.93758	-4.80273	1.56515e-06	0.000107087	pumilio
Soltu.DM.03G021350.1	54.0065	-9.2635	2.21061	-4.19048	2.78369e-05	0.0011418	Calcium-binding endonuclease/exonuclease/phosphatase family
Soltu.DM.03G020310.2	53.7938	-9.25833	3.18749	-2.90458	0.00367747	0.045704	P-loop containing nucleoside triphosphate hydrolases superfamily protein
Soltu.DM.10G002150.3	53.5877	-9.25255	3.19702	-2.89412	0.00380224	0.0467583	Protein kinase superfamily protein
Soltu.DM.03G022500.4	48.2326	-9.10024	1.23832	-7.34885	1.99917e-13	9.45373e-11	Calcium-binding EF-hand family protein
Soltu.DM.03G021350.4	39.3038	-8.80541	2.20122	-4.00023	6.32797e-05	0.00212923	Calcium-binding endonuclease/exonuclease/phosphatase family
Soltu.DM.10G015520.3	38.1589	-8.76366	1.8119	-4.83673	1.31995e-06	9.34311e-05	NAD(P)-binding Rossmann-fold superfamily protein
Soltu.DM.12G001870.4	23.1369	-8.0429	2.2836	-3.52203	0.000428258	0.00946413	evolutionarily conserved C-terminal region
Soltu.DM.05G023330.1	16.8677	-7.58943	1.16783	-6.49876	8.09825e-11	1.92322e-08	Ferritin-like domain containing protein
Soltu.DM.12G024600.1	11.7018	-6.31844	1.40727	-4.48986	7.12699e-06	0.000373717	hypothetical protein
Soltu.DM.12G024600.2	238.227	-5.90837	0.701005	-8.42842	3.50361e-17	3.82746e-14	hypothetical protein
Soltu.DM.04G023000.1	16.921	-5.6904	1.4322	-3.9732	7.09135e-05	0.00232405	Thioredoxin superfamily protein
Soltu.DM.08G018400.2	22.8319	-5.55332	1.58634	-3.50071	0.000464024	0.0100115	Aldolase superfamily protein
Soltu.DM.12G024610.1	237.457	-4.95028	0.739155	-6.69722	2.12417e-11	6.0535e-09	hypothetical protein
Soltu.DM.01G027370.1	93.8432	-4.9014	1.68083	-2.91605	0.0035449	0.0444656	carotenoid cleavage dioxygenase
Soltu.DM.09G029880.1	122.68	-4.83408	1.53302	-3.1533	0.00161437	0.0252663	terpene synthase
Soltu.DM.05G020270.2	66.2354	-4.03984	1.00677	-4.01269	6.00304e-05	0.00204935	Pyridoxamine 5'-phosphate oxidase family protein
Soltu.DM.10G023650.1	18.3417	-3.93583	1.04266	-3.77481	0.000160131	0.0044512	Ankyrin repeat family protein
Soltu.DM.01G039760.1	68.726	-3.75178	0.977321	-3.83885	0.000123613	0.00363009	Protein phosphatase 2C family protein
Soltu.DM.02G032930.7	956.998	-3.65996	0.771457	-4.74422	2.09312e-06	0.000136107	carbonic anhydrase
Soltu.DM.09G016880.1	47.9261	-3.55563	0.726018	-4.89744	9.70934e-07	7.31397e-05	Protein of unknown function (DUF506)
Soltu.DM.05G004390.2	514.077	-3.51936	0.947708	-3.71354	0.000204377	0.00534122	Sec-independent periplasmic protein translocase
Soltu.DM.02G011980.1	34.481	-3.41155	0.76897	-4.43652	9.1426e-06	0.000463107	phloem protein 2-A10
Soltu.DM.01G019940.1	146.132	-25.0288	3.38366	-7.39696	1.39338e-13	7.22589e-11	CONSTANS-like
Soltu.DM.09G021930.1	133.709	-2.70945	0.514015	-5.27114	1.35581e-07	1.35884e-05	hypothetical protein
Soltu.DM.08G014660.1	82.3141	-2.68291	0.458447	-5.85218	4.85176e-09	7.57174e-07	Polyketide cyclase/dehydrase and lipid transport superfamily protein
Soltu.DM.07G024870.1	1337.76	-2.66016	0.349433	-7.61278	2.68256e-14	1.69068e-11	Protein of unknown function (DUF761)
Soltu.DM.10G028240.1	457.917	-2.64971	0.634386	-4.17682	2.95618e-05	0.00120588	Mitochondrial substrate carrier family protein
Soltu.DM.04G031540.1	276.39	-2.63927	0.747169	-3.53236	0.000411871	0.00918248	beta HLH protein
Soltu.DM.03G028440.1	15.9857	-2.62727	0.635442	-4.13455	3.55653e-05	0.00138266	EF hand calcium-binding protein family
Soltu.DM.02G013480.2	57.574	-2.56935	0.87146	-2.94832	0.00319501	0.0413874	P-loop containing nucleoside triphosphate hydrolases superfamily protein
Soltu.DM.04G034550.2	33.2248	-2.54904	0.522319	-4.88024	1.05956e-06	7.76841e-05	AP2/B3-like transcriptional factor family protein
Soltu.DM.01G024970.1	46.5979	-2.47396	0.501474	-4.93337	8.08226e-07	6.23628e-05	conserved hypothetical protein
Soltu.DM.05G005290.1	194.254	-2.47177	0.744433	-3.32034	0.000899078	0.0166096	PsbQ-like
Soltu.DM.12G009120.1	1492.73	-2.3318	0.729616	-3.19593	0.0013938	0.0226808	germin
Soltu.DM.09G021770.1	258.777	-2.21613	0.721648	-3.07094	0.00213388	0.0309801	Pollen Ole e 1 allergen and extensin family protein
Soltu.DM.06G007030.2	226.452	-2.19939	0.573508	-3.83497	0.000125579	0.0036812	ethylene-dependent gravitropism-deficient and yellow-green-like
Soltu.DM.02G027190.2	57.1123	-2.14012	0.592212	-3.61377	0.000301775	0.00719063	xyloglucan endotransglucosylase/hydrolase
Soltu.DM.07G001980.1	538.823	-2.1395	0.419779	-5.09674	3.45553e-07	3.05251e-05	CAP (Cysteine-rich secretory proteins, Antigen 5, and Pathogenesis-related 1 protein) superfamily protein
Soltu.DM.09G025620.1	653.873	-2.09326	0.631468	-3.3149	0.000916745	0.0168222	NAD(P)H dehydrogenase
Soltu.DM.08G025210.1	1314.75	-2.08434	0.587276	-3.54916	0.000386468	0.00873497	Bifunctional inhibitor/lipid-transfer protein/seed storage 2S albumin superfamily protein
Soltu.DM.05G026870.1	625.592	-2.06309	0.479128	-4.30593	1.66289e-05	0.00075482	phenylalanine ammonia-lyase
Soltu.DM.04G030200.2	668.223	-2.0306	0.626812	-3.23956	0.00119713	0.0203496	ascorbate peroxidase
Soltu.DM.03G029790.1	335.145	-11.8963	1.09464	-10.8678	1.64146e-27	5.97729e-24	actin binding
Soltu.DM.07G000450.1	1700.07	-1.95095	0.494099	-3.94851	7.86393e-05	0.00252177	Polyketide cyclase/dehydrase and lipid transport superfamily protein
Soltu.DM.03G002190.1	356.91	-1.938	0.623163	-3.10994	0.00187128	0.0282095	conserved hypothetical protein
Soltu.DM.12G004790.1	7854.85	-1.92157	0.639392	-3.00531	0.00265309	0.0364263	glyceraldehyde-3-phosphate dehydrogenase B subunit
Soltu.DM.10G001730.1	95.0698	-1.88495	0.615691	-3.06152	0.00220218	0.0317673	PsbQ-like
Soltu.DM.04G003770.1	649.877	-1.85347	0.342997	-5.40376	6.52593e-08	7.37497e-06	purple acid phosphatase
Soltu.DM.05G006710.1	152.971	-1.84921	0.456411	-4.05163	5.08612e-05	0.00181973	Glutathione S-transferase family protein
Soltu.DM.05G021690.2	482.429	-1.83108	0.603747	-3.03286	0.00242251	0.0341328	chloroplast-localized ISCA-like protein
Soltu.DM.06G010770.1	59.5458	-1.8072	0.520944	-3.46908	0.000522242	0.0110493	Peroxidase superfamily protein
Soltu.DM.01G044250.1	442.795	-1.80384	0.503652	-3.58152	0.000341597	0.00795545	Protein phosphatase 2C family protein
Soltu.DM.06G024880.1	100.878	-1.78743	0.262464	-6.81019	9.74701e-12	3.07153e-09	S-adenosyl-L-methionine-dependent methyltransferases superfamily protein
Soltu.DM.04G036840.1	165.151	-1.77596	0.507847	-3.49704	0.000470448	0.0101101	hypothetical protein
Soltu.DM.01G050330.2	87.1661	-1.75486	0.485117	-3.61741	0.00029757	0.00712884	Basic-leucine zipper (bZIP) transcription factor family protein
Soltu.DM.10G001020.2	97.4337	-1.75351	0.585233	-2.99627	0.00273306	0.0372919	FKBP-like peptidyl-prolyl cis-trans isomerase family protein
Soltu.DM.03G000560.1	669.104	-1.74567	0.256254	-6.81227	9.60731e-12	3.07153e-09	HR-like lesion-inducing protein-related
Soltu.DM.04G008530.1	107.485	-1.73757	0.419482	-4.14217	3.44029e-05	0.00135028	RING/U-box superfamily protein
Soltu.DM.08G022350.1	57.4257	-1.73521	0.509794	-3.40375	0.000664685	0.0132585	RNA-binding (RRM/RBD/RNP motifs) family protein
Soltu.DM.09G000340.1	79.2834	-1.73101	0.425885	-4.0645	4.81364e-05	0.00173933	Polyketide cyclase/dehydrase and lipid transport superfamily protein
Soltu.DM.06G003900.1	2042.18	-1.7197	0.580926	-2.96028	0.00307364	0.0403414	plastid transcriptionally active
Soltu.DM.10G027550.1	1799.66	-1.69933	0.309538	-5.48988	4.02212e-08	4.77597e-06	beta-1,3-glucanase
Soltu.DM.09G028680.1	64.6988	-1.65701	0.284453	-5.82523	5.70333e-09	8.65349e-07	P-loop containing nucleoside triphosphate hydrolases superfamily protein
Soltu.DM.05G010400.1	86.3085	-1.60662	0.309167	-5.1966	2.02969e-07	1.91698e-05	S-adenosyl-L-methionine-dependent methyltransferases superfamily protein
Soltu.DM.09G001370.1	179.757	-1.58703	0.46829	-3.38898	0.000701529	0.0138251	glutathione S-transferase TAU
Soltu.DM.04G034660.1	216.96	-1.58488	0.496701	-3.1908	0.00141877	0.0229617	Transducin/WD40 repeat-like superfamily protein
Soltu.DM.06G029380.1	72.9324	-1.57681	0.462529	-3.4091	0.000651766	0.0130804	conserved hypothetical protein
Soltu.DM.12G025810.2	2036.37	-1.55923	0.50327	-3.09821	0.00194696	0.0290036	beta galactosidase
Soltu.DM.02G022080.1	175.488	-1.54119	0.310679	-4.96071	7.02376e-07	5.64191e-05	minichromosome maintenance (MCM2/3/5) family protein
Soltu.DM.12G015060.2	431.558	-1.53048	0.491292	-3.11522	0.0018381	0.0277988	NDH dependent flow
Soltu.DM.11G024450.1	308.449	-1.52553	0.320868	-4.75439	1.99044e-06	0.000130727	aldehyde oxidase
Soltu.DM.03G030940.1	1098.69	-1.51522	0.354141	-4.27858	1.88089e-05	0.00083076	NDH-dependent cyclic electron flow
Soltu.DM.04G005250.1	28568.7	-1.49783	0.513505	-2.91688	0.00353554	0.0444288	glyceraldehyde 3-phosphate dehydrogenase A subunit
Soltu.DM.12G004880.1	45.1657	-1.45508	0.362923	-4.00934	6.08878e-05	0.00207	ubiquitin protein ligase
Soltu.DM.03G023900.2	83.0148	-1.4535	0.466517	-3.11564	0.00183547	0.0277718	beta-galactosidase
Soltu.DM.08G025180.1	1770.44	-1.44733	0.443826	-3.26103	0.00111009	0.0192798	extensin-like protein
Soltu.DM.05G021610.1	1218.13	-1.42444	0.38609	-3.68941	0.000224776	0.00576416	alpha/beta-Hydrolases superfamily protein
Soltu.DM.08G002050.1	68.541	-1.42305	0.301503	-4.71985	2.36017e-06	0.000149036	GDSL-like Lipase/Acylhydrolase superfamily protein
Soltu.DM.12G025930.1	751.295	-1.41982	0.472887	-3.00245	0.00267819	0.0366983	Lycopene beta/epsilon cyclase protein
Soltu.DM.04G035400.1	1267.32	-1.41379	0.474119	-2.98193	0.00286436	0.0383784	Leucine carboxyl methyltransferase
Soltu.DM.02G026870.1	19842.2	-1.39362	0.439498	-3.17093	0.0015195	0.0241975	serine transhydroxymethyltransferase
Soltu.DM.05G026770.2	925.115	-1.39276	0.377645	-3.68802	0.000226007	0.00578666	photosystem I light harvesting complex gene
Soltu.DM.02G020350.2	2651.66	-1.38819	0.484425	-2.86564	0.00416172	0.0499788	Glycine cleavage T-protein family
Soltu.DM.10G020990.1	1353.5	-1.38749	0.464775	-2.98528	0.00283315	0.0380927	PHE ammonia lyase
Soltu.DM.10G023760.5	157.933	-1.37175	0.35916	-3.81933	0.000133816	0.00388101	WRKY DNA-binding protein
Soltu.DM.04G037160.1	2398.22	-1.35507	0.386432	-3.50663	0.000453823	0.00984324	Pyridoxal-dependent decarboxylase family protein
Soltu.DM.10G029540.5	1094.68	-1.33776	0.458083	-2.92033	0.00349659	0.0440406	glutamate dehydrogenase
Soltu.DM.09G029230.1	423.775	-1.32647	0.441803	-3.00241	0.00267849	0.0366983	sucrose phosphate synthase 3F
Soltu.DM.01G035860.1	162.946	-1.3115	0.327638	-4.0029	6.25706e-05	0.00211187	cytochrome P450, family 98, subfamily A, polypeptide
Soltu.DM.03G032380.1	105.685	-1.2925	0.43863	-2.94667	0.00321212	0.0415106	conserved hypothetical protein
Soltu.DM.07G013280.1	1356.87	-1.26482	0.335519	-3.76973	0.000163423	0.00452374	Thioredoxin superfamily protein
Soltu.DM.11G004070.1	4065.46	-1.25695	0.431752	-2.91128	0.00359952	0.0450084	Haloacid dehalogenase-like hydrolase (HAD) superfamily protein
Soltu.DM.09G006780.1	26.193	-1.24226	0.401705	-3.09246	0.00198505	0.0294905	Amidase family protein
Soltu.DM.11G026630.1	226.157	-1.21744	0.388359	-3.13483	0.00171952	0.0265194	Protein-tyrosine phosphatase-like, PTPLA
Soltu.DM.09G030640.1	405.65	-1.21563	0.406482	-2.99062	0.00278412	0.0376914	basic helix-loop-helix (bHLH) DNA-binding superfamily protein
Soltu.DM.05G005100.1	544.217	-1.21082	0.380741	-3.18018	0.00147186	0.0235593	NAD(P)-linked oxidoreductase superfamily protein
Soltu.DM.01G027550.1	124.564	-1.20471	0.386597	-3.11619	0.00183206	0.0277331	telomerase reverse transcriptase
Soltu.DM.03G014770.1	156.21	-1.19601	0.260117	-4.59798	4.26608e-06	0.000240349	Lipase/lipooxygenase, PLAT/LH2 family protein
Soltu.DM.02G006950.1	305.4	-1.18626	0.331281	-3.58082	0.00034252	0.00796415	Tubulin/FtsZ family protein
Soltu.DM.11G023760.5	146.693	-1.17907	0.373123	-3.16	0.00157768	0.0248097	cell division control
Soltu.DM.01G035380.1	624.62	-1.16874	0.379446	-3.08012	0.0020692	0.0303418	DUF4079 domain containing protein
Soltu.DM.03G004390.1	1844.31	-1.15991	0.354472	-3.27223	0.00106703	0.0187092	acclimation of photosynthesis to environment
Soltu.DM.03G008750.2	1816.66	-1.15041	0.384256	-2.99387	0.00275467	0.0374263	Rhodanese/Cell cycle control phosphatase superfamily protein
Soltu.DM.02G025940.1	87.7999	-1.14459	0.385241	-2.97111	0.00296726	0.039355	abscisic acid (aba)-deficient
Soltu.DM.08G012090.1	597.823	-1.14365	0.346843	-3.29732	0.000976118	0.0175599	P-type ATPase of Arabidopsis
Soltu.DM.05G022730.1	709.058	-1.12763	0.372723	-3.02539	0.00248311	0.0347066	plastid-specific ribosomal protein
Soltu.DM.07G016850.1	161.491	-1.10913	0.294022	-3.77225	0.000161783	0.00448952	Ypt/Rab-GAP domain of gyp1p superfamily protein
Soltu.DM.04G031730.1	1866.2	-1.09726	0.259444	-4.22926	2.34461e-05	0.000997835	Tubulin/FtsZ family protein
Soltu.DM.06G033760.1	138.694	-1.08733	0.19273	-5.64169	1.68385e-08	2.22519e-06	cytochrome B5 isoform B
Soltu.DM.11G015130.1	495.251	-1.05631	0.312435	-3.38089	0.000722505	0.0140693	minichromosome maintenance (MCM2/3/5) family protein
Soltu.DM.05G021940.1	333.481	-1.03444	0.329608	-3.13841	0.00169868	0.0262474	Major facilitator superfamily protein
Soltu.DM.05G020400.1	659.284	-1.03039	0.25219	-4.08577	4.39314e-05	0.0016281	alpha/beta-Hydrolases superfamily protein
Soltu.DM.03G018130.1	1047.84	-1.0283	0.31959	-3.21756	0.00129285	0.0215736	RNA recognition motif (RRM)-containing protein
Soltu.DM.05G024490.1	58.0059	-1.0171	0.302573	-3.36149	0.000775239	0.0148232	Immunoglobulin E-set superfamily protein
Soltu.DM.12G001320.2	1922.58	-1.01622	0.307157	-3.30847	0.000938068	0.0170891	Protein phosphatase 2C family protein
Soltu.DM.10G022110.1	268.615	-1.01003	0.296567	-3.40574	0.000659855	0.0131943	Enolase
Soltu.DM.01G038280.2	79.5941	9.71141	2.11028	4.60195	4.18544e-06	0.000237729	Eukaryotic aspartyl protease family protein
Soltu.DM.01G023240.1	130.811	9.70568	1.16851	8.30605	9.89427e-17	9.82621e-14	Tetratricopeptide repeat (TPR)-like superfamily protein
Soltu.DM.03G023370.2	69.9804	9.52554	3.13162	3.04172	0.00235228	0.0333439	Pentatricopeptide repeat (PPR) superfamily protein
Soltu.DM.05G004290.2	69.5193	9.51601	2.16664	4.39206	1.1228e-05	0.00054677	poly(A) polymerase
Soltu.DM.01G032350.2	63.1354	9.37676	3.19269	2.93694	0.00331466	0.0424341	Homeobox-leucine zipper family protein / lipid-binding START domain-containing protein
Soltu.DM.04G011730.1	58.7739	9.27345	3.19949	2.89842	0.00375052	0.0462959	TCP-1/cpn60 chaperonin family protein
Soltu.DM.06G022280.1	55.5608	9.19243	3.19267	2.87923	0.00398647	0.0483704	exocyst subunit exo70 family protein D3
Soltu.DM.08G021530.1	41.8018	8.78182	1.24102	7.07629	1.48067e-12	5.57771e-10	Family of unknown function (DUF716) domain containing protein
Soltu.DM.02G001720.3	41.6337	8.77678	2.35419	3.72815	0.000192893	0.00510934	Tudor/PWWP/MBT domain-containing protein
Soltu.DM.07G022680.2	38.7699	8.67348	2.16142	4.01287	5.9985e-05	0.00204935	ROP interactive partner
Soltu.DM.08G008500.2	37.7717	8.63561	2.21401	3.90043	9.60213e-05	0.0029824	LEM3 (ligand-effect modulator 3) family protein / CDC50 family protein
Soltu.DM.04G025200.1	75.6657	7.94033	1.5746	5.04276	4.58859e-07	3.89844e-05	Target of Myb protein
Soltu.DM.01G007360.1	23.0836	7.92593	2.1765	3.64159	0.000270961	0.00662208	conserved hypothetical protein
Soltu.DM.11G022960.2	22.9228	7.91577	2.2415	3.53146	0.000413279	0.00920135	GATA transcription factor
Soltu.DM.08G010440.3	22.3436	7.87771	2.43337	3.23737	0.00120637	0.0204745	ATP binding microtubule motor family protein
Soltu.DM.03G006390.2	17.5727	7.53261	2.20261	3.41985	0.00062656	0.012712	Proline-rich spliceosome-associated (PSP) family protein / zinc knuckle (CCHC-type) family protein
Soltu.DM.12G027150.2	15.493	7.35047	2.35717	3.11834	0.00181872	0.0276273	hypothetical protein
Soltu.DM.07G012770.4	11.4673	6.91563	2.29907	3.00801	0.00262969	0.0361808	GGL domain containing protein
Soltu.DM.04G020820.1	11.1053	6.87027	2.30391	2.982	0.00286369	0.0383784	Eukaryotic aspartyl protease family protein
Soltu.DM.03G008600.3	11.0575	6.86323	2.31235	2.96807	0.00299673	0.0396335	Small GTP-binding protein
Soltu.DM.01G002290.1	43.6937	6.64244	2.08432	3.18686	0.00143828	0.0231859	NAD(P)-binding Rossmann-fold superfamily protein
Soltu.DM.01G032580.2	40.2613	6.60836	1.30099	5.07947	3.78498e-07	3.31672e-05	SET domain-containing protein
Soltu.DM.02G023510.2	9.20904	6.60103	1.4173	4.65746	3.20135e-06	0.000190069	farnesylated protein
Soltu.DM.04G034600.1	8.06605	6.40644	1.46026	4.38718	1.14829e-05	0.000557264	cytochrome P450, family 82, subfamily C, polypeptide
Soltu.DM.02G005430.2	8.03438	6.39758	1.74472	3.66682	0.000245589	0.0061503	ACT-like protein tyrosine kinase family protein
Soltu.DM.07G026470.1	7.31774	6.27142	1.47037	4.26521	1.99716e-05	0.000871544	hypothetical protein
Soltu.DM.11G009510.3	42.522	6.26002	1.95576	3.20081	0.0013704	0.0224449	NADH:ubiquinone oxidoreductase intermediate-associated protein
Soltu.DM.04G027160.1	6.66363	6.13943	1.57412	3.90024	9.60979e-05	0.0029824	Cupredoxin superfamily protein
Soltu.DM.11G014190.3	6.36271	6.05978	1.623	3.7337	0.00018869	0.00503169	hypothetical protein
Soltu.DM.04G028870.2	25.2372	6.03095	2.02911	2.97222	0.00295656	0.0392793	Eukaryotic aspartyl protease family protein
Soltu.DM.09G014550.1	5.47702	5.84842	1.30657	4.47618	7.59901e-06	0.000392812	conserved hypothetical protein
Soltu.DM.08G024320.2	19.3484	5.81749	1.08778	5.34805	8.89092e-08	9.73121e-06	Protein of unknown function (DUF1639)
Soltu.DM.10G000050.1	45.7462	5.75351	1.21888	4.72034	2.35452e-06	0.000149036	Late embryogenesis abundant (LEA) hydroxyproline-rich glycoprotein family
Soltu.DM.10G003660.1	4.55326	5.57907	1.53773	3.62811	0.000285507	0.00689021	cytochrome P450, family 72, subfamily A, polypeptide
Soltu.DM.09G028530.1	27.2402	5.57755	0.858967	6.49332	8.39631e-11	1.97966e-08	transcription factor jumonji (jmjC) domain-containing protein
Soltu.DM.03G035280.2	4.40396	5.52716	1.69556	3.25977	0.00111501	0.0193549	PLAC8 family protein
Soltu.DM.04G019920.1	4.21294	5.47193	1.582	3.45886	0.000542459	0.0113889	plant U-box
Soltu.DM.02G015040.3	17.833	5.30551	1.72567	3.07447	0.00210878	0.0306888	histidinol dehydrogenase
Soltu.DM.03G032250.2	169.772	5.26174	1.61337	3.26134	0.00110886	0.0192779	TUDOR-SN protein
Soltu.DM.01G039710.1	848.621	4.8669	0.574567	8.47055	2.44232e-17	2.76008e-14	phloem protein 2-B15
Soltu.DM.11G017190.1	47.1659	4.54701	1.53058	2.97077	0.00297055	0.0393812	Sucrose-phosphate synthase family protein
Soltu.DM.10G017490.1	81.6163	4.52708	1.20628	3.75292	0.000174783	0.00472621	hypothetical protein
Soltu.DM.02G003600.2	10.6016	4.32084	1.35329	3.19284	0.00140882	0.0228458	Ribosomal protein L7/L12, oligomerisation;Ribosomal protein L7/L12, C-terminal/adaptor protein ClpS-like
Soltu.DM.06G012780.1	12.0061	4.29002	1.25348	3.4225	0.000620489	0.0126306	carboxyesterase
Soltu.DM.02G006230.1	18.0515	4.24186	1.36928	3.09788	0.00194912	0.0290208	RTE1-homolog
Soltu.DM.02G013600.1	137.849	4.21863	1.24488	3.38878	0.000702041	0.0138269	RNA-binding protein
Soltu.DM.03G024430.3	25.9326	4.21222	1.42558	2.95474	0.00312931	0.0408106	Nucleic acid-binding, OB-fold-like protein
Soltu.DM.01G027620.1	48.7661	4.19894	1.22235	3.43515	0.000592225	0.0121989	RING/U-box superfamily protein
Soltu.DM.07G001840.1	9.67558	4.17746	1.36599	3.0582	0.00222674	0.0320356	ribonuclease
Soltu.DM.12G004960.3	66.5063	4.11842	1.02094	4.03397	5.48427e-05	0.00192026	PCF11P-similar protein
Soltu.DM.04G019720.2	10.6299	4.10078	1.23607	3.31761	0.000907918	0.016711	Nucleic acid-binding, OB-fold-like protein
Soltu.DM.12G028880.1	195.797	3.86613	1.07062	3.6111	0.000304901	0.00725674	Transcription factor IIIC, subunit
Soltu.DM.01G052070.1	78.2602	3.75057	1.11686	3.35813	0.000784727	0.0149697	SEC7-like guanine nucleotide exchange family protein
Soltu.DM.01G021890.2	16.438	3.60236	1.07657	3.34614	0.000819436	0.0154697	Heavy metal transport/detoxification superfamily protein
Soltu.DM.01G024030.1	111.355	3.55211	0.554328	6.40796	1.4748e-10	3.24386e-08	basic helix-loop-helix (bHLH) DNA-binding superfamily protein
Soltu.DM.03G033140.1	144.624	3.39181	0.524223	6.47016	9.78974e-11	2.25943e-08	StWOX1
Soltu.DM.03G028650.1	203.038	3.35344	1.16003	2.89083	0.0038422	0.0471083	Phosphoribulokinase / Uridine kinase family
Soltu.DM.12G028850.2	22.4702	3.3305	0.986217	3.37705	0.000732672	0.0142082	Heavy metal transport/detoxification superfamily protein
Soltu.DM.02G032930.6	5519.63	3.32149	0.604456	5.49502	3.90676e-08	4.65586e-06	carbonic anhydrase
Soltu.DM.07G014090.5	49.343	3.29909	1.01564	3.2483	0.00116098	0.0198999	Pyridoxal phosphate (PLP)-dependent transferases superfamily protein
Soltu.DM.02G010560.4	36.1373	3.26441	1.05975	3.08035	0.0020676	0.030332	S-adenosyl-L-methionine-dependent methyltransferases superfamily protein
Soltu.DM.09G028330.1	138.477	3.23235	0.548466	5.89343	3.78251e-09	6.04704e-07	hypothetical protein
Soltu.DM.03G021150.2	72.9898	3.20177	1.03994	3.07881	0.00207829	0.0304071	Vacuolar iron transporter (VIT) family protein
Soltu.DM.01G019410.1	9.60156	3.04135	0.818034	3.71787	0.000200908	0.0052675	hypothetical protein
Soltu.DM.12G010960.1	668.394	3.01555	0.361501	8.34175	7.32006e-17	7.49689e-14	Leucine-rich repeat (LRR) family protein
Soltu.DM.06G005570.1	1754.77	27.7141	3.38339	8.19121	2.58621e-16	2.29075e-13	GTP binding Elongation factor Tu family protein
Soltu.DM.01G040400.1	192.816	24.6651	3.38356	7.28969	3.10659e-13	1.3575e-10	haloacid dehalogenase-like hydrolase family protein
Soltu.DM.02G032930.1	233.73	23.8589	3.38353	7.05149	1.77014e-12	6.59236e-10	carbonic anhydrase
Soltu.DM.02G010900.1	6.89893	2.98642	1.00126	2.98266	0.00285758	0.0383346	hypothetical protein
Soltu.DM.11G004150.1	5373.3	2.97184	0.436362	6.81048	9.72725e-12	3.07153e-09	dicer-like
Soltu.DM.03G037040.2	57.3175	2.96714	0.846696	3.50437	0.000457687	0.00989432	Mono-/di-acylglycerol lipase, N-terminal;Lipase, class
Soltu.DM.10G014760.1	7.49265	2.92335	0.857039	3.41098	0.000647289	0.0130416	hypothetical protein
Soltu.DM.04G036200.1	12.1743	2.87457	1.00137	2.87064	0.00409638	0.0493388	Leucine-rich receptor-like protein kinase family protein
Soltu.DM.10G015480.4	102.311	2.84902	0.849145	3.35517	0.000793175	0.0150694	Protein of unknown function, DUF547
Soltu.DM.08G029980.3	235.35	2.83906	0.790175	3.59295	0.000326954	0.00767019	YELLOW STRIPE like
Soltu.DM.02G003650.1	1307.06	2.81843	0.302479	9.31775	1.18831e-20	1.94722e-17	zinc transporter 5 precursor
Soltu.DM.09G026010.1	101.666	2.79645	0.615142	4.54602	5.46695e-06	0.000298614	UDP-Glycosyltransferase superfamily protein
Soltu.DM.09G018510.1	83.3184	2.77783	0.805501	3.44858	0.000563541	0.0117242	hypothetical protein
Soltu.DM.03G003640.1	1179.82	2.64104	0.359071	7.35518	1.90663e-13	9.18913e-11	cold shock domain protein
Soltu.DM.03G033060.1	28.1496	2.58377	0.648014	3.98722	6.68534e-05	0.00222209	zinc finger (Ran-binding) family protein
Soltu.DM.01G041030.1	33.274	2.58081	0.614605	4.19914	2.67933e-05	0.00111149	terpene synthase
Soltu.DM.12G011520.1	20.811	2.56682	0.674108	3.80772	0.000140252	0.00402209	Integrase-type DNA-binding superfamily protein
Soltu.DM.11G010100.1	71.2519	2.55973	0.808607	3.1656	0.00154763	0.0244554	3-dehydroquinate synthase II domain containing protein
Soltu.DM.03G012350.1	74.0772	2.50053	0.471906	5.29878	1.16578e-07	1.18653e-05	Glycosyl hydrolase family protein
Soltu.DM.07G004180.1	71.2402	2.45091	0.443493	5.52638	3.26899e-08	3.94817e-06	peptide transporter
Soltu.DM.07G011520.1	116.924	2.38508	0.352217	6.77162	1.27346e-11	3.90048e-09	GATA type zinc finger transcription factor family protein
Soltu.DM.10G018110.1	176.238	2.36242	0.574657	4.11101	3.93931e-05	0.00149772	CCAAT-binding factor
Soltu.DM.02G014620.1	753.06	2.36022	0.346215	6.81721	9.28275e-12	3.04223e-09	subtilase family protein
Soltu.DM.02G026610.1	211.996	2.34538	0.440598	5.32317	1.01974e-07	1.08156e-05	Heavy metal transport/detoxification superfamily protein
Soltu.DM.02G021580.1	7.98158	2.32861	0.762237	3.05497	0.00225081	0.0322729	HXXXD-type acyl-transferase family protein
Soltu.DM.01G039950.2	50.4326	2.25388	0.340253	6.62414	3.49282e-11	9.08493e-09	GATA type zinc finger transcription factor family protein
Soltu.DM.01G005230.1	55.8011	2.24408	0.678253	3.30862	0.000937564	0.0170891	Glycosyl hydrolase superfamily protein
Soltu.DM.06G028370.1	38.0883	2.21413	0.757054	2.92467	0.00344822	0.0436664	SPFH/Band 7/PHB domain-containing membrane-associated protein family
Soltu.DM.02G029880.3	129.234	2.19433	0.669858	3.27581	0.0010536	0.0185543	BEL1-like homeodomain
Soltu.DM.03G029910.1	82.8807	2.14841	0.322803	6.65549	2.82366e-11	7.4629e-09	Polynucleotidyl transferase, ribonuclease H-like superfamily protein
Soltu.DM.09G015200.1	9.9475	2.05729	0.59516	3.4567	0.000546841	0.0114515	hypothetical protein
Soltu.DM.12G004070.2	21.113	2.05667	0.698568	2.94411	0.0032388	0.0417401	methyltransferases
Soltu.DM.07G016180.2	24.1512	2.05411	0.635779	3.23086	0.00123418	0.0208386	Ubiquitin fusion degradation UFD1 family protein
Soltu.DM.09G023790.1	154.358	2.03276	0.252059	8.06463	7.34569e-16	5.98168e-13	P-loop nucleoside triphosphate hydrolases superfamily protein with CH (Calponin Homology) domain
Soltu.DM.10G021890.1	222.815	2.02402	0.342737	5.90547	3.51644e-09	5.64922e-07	WRKY DNA-binding protein
Soltu.DM.02G004980.1	15.6928	2.00457	0.624969	3.20746	0.0013391	0.0221067	StCLE21
Soltu.DM.06G003010.2	36.6694	2.00018	0.679531	2.94347	0.00324553	0.0418104	Ubiquitin family domain containing protein
Soltu.DM.09G022310.1	288.196	11.567	1.04654	11.0526	2.12984e-28	8.72514e-25	Small nuclear ribonucleoprotein family protein
Soltu.DM.08G004000.2	156.767	10.6878	1.07697	9.92401	3.2735e-23	8.25248e-20	NAD(P)-binding Rossmann-fold superfamily protein
Soltu.DM.02G029690.3	117.74	10.2762	2.07821	4.94472	7.62527e-07	6.00728e-05	Protein of unknown function (DUF1162)
Soltu.DM.06G002440.3	58.9116	1.94095	0.561268	3.45815	0.000543907	0.0114047	ATP binding
Soltu.DM.05G008750.1	90.2766	1.94067	0.397457	4.88272	1.0463e-06	7.72307e-05	nuclear factor Y, subunit B6
Soltu.DM.12G005770.1	148.441	1.89895	0.621601	3.05493	0.00225112	0.0322729	Subtilisin-like serine endopeptidase family protein
Soltu.DM.02G007370.4	3384.07	1.897	0.485573	3.90673	9.35531e-05	0.0029228	Protein of unknown function (duplicated DUF1399)
Soltu.DM.02G023340.2	41.2994	1.88623	0.517808	3.64272	0.000269769	0.0066028	NEP-interacting protein
Soltu.DM.11G019970.1	36.7154	1.88475	0.631567	2.98424	0.00284288	0.0381843	conserved hypothetical protein
Soltu.DM.09G002820.1	24.4051	1.86378	0.499632	3.7303	0.000191255	0.00508354	NAC domain containing protein
Soltu.DM.02G023340.1	452.667	1.85929	0.398735	4.66298	3.1167e-06	0.000186734	NEP-interacting protein
Soltu.DM.07G017270.1	28.2716	1.83689	0.566979	3.23979	0.00119618	0.0203496	terpene synthase
Soltu.DM.02G012300.1	496.085	1.81908	0.487994	3.72767	0.000193261	0.00511198	ARGONAUTE
Soltu.DM.05G025490.2	20.204	1.78522	0.578032	3.08845	0.00201201	0.0297679	Nitrilase/cyanide hydratase and apolipoprotein N-acyltransferase family protein
Soltu.DM.10G004970.1	56.7517	1.77047	0.558431	3.17043	0.00152213	0.0242277	squamosa promoter binding protein-like
Soltu.DM.08G021510.1	66.5979	1.76956	0.367417	4.81622	1.46305e-06	0.000101801	growth-regulating factor
Soltu.DM.07G007360.2	48.0209	1.76947	0.481378	3.67585	0.000237062	0.00598554	Afadin/alpha-actinin-binding protein
Soltu.DM.05G017370.1	32.5724	1.76274	0.603748	2.91965	0.0035042	0.0441026	nudix hydrolase homolog
Soltu.DM.09G030360.1	578.993	1.76213	0.372687	4.72817	2.26556e-06	0.000144173	hypothetical protein
Soltu.DM.09G004090.1	228.763	1.76002	0.407074	4.32359	1.53508e-05	0.000707585	growth-regulating factor
Soltu.DM.05G020930.1	254.933	1.74059	0.570674	3.05005	0.00228801	0.0326939	NAD(P)-binding Rossmann-fold superfamily protein
Soltu.DM.03G018130.2	961.246	1.72811	0.418503	4.12927	3.63916e-05	0.0014074	RNA recognition motif (RRM)-containing protein
Soltu.DM.05G026940.2	873.009	1.72408	0.524046	3.28993	0.00100212	0.017859	Class II aminoacyl-tRNA and biotin synthetases superfamily protein
Soltu.DM.04G008570.1	34.474	1.72391	0.486663	3.5423	0.000396649	0.0089098	homeobox protein
Soltu.DM.07G016620.1	166.43	1.71731	0.57928	2.96456	0.0030312	0.0399123	GDSL-like Lipase/Acylhydrolase superfamily protein
Soltu.DM.04G028500.2	509.271	1.70199	0.559771	3.04052	0.00236171	0.0334488	conserved hypothetical protein
Soltu.DM.06G003220.1	135.086	1.6963	0.281221	6.03192	1.62023e-09	2.76561e-07	josephin protein-related
Soltu.DM.01G002650.1	531.435	1.68984	0.508027	3.32629	0.000880107	0.0163669	nuclear factor Y, subunit A10
Soltu.DM.08G004410.2	123.682	1.67908	0.414067	4.05509	5.01144e-05	0.0017989	PIN domain-like family protein
Soltu.DM.12G006340.1	81.0453	1.67701	0.543138	3.08763	0.0020176	0.0298253	branched-chain amino acid transaminase
Soltu.DM.04G029410.1	49.6947	1.67429	0.344468	4.86049	1.17093e-06	8.41554e-05	Protein kinase family protein with leucine-rich repeat domain
Soltu.DM.06G018550.1	24.6914	1.65289	0.423442	3.90345	9.48303e-05	0.00295425	C2H2 and C2HC zinc fingers superfamily protein
Soltu.DM.08G013360.1	3129.61	1.63739	0.267662	6.11738	9.51287e-10	1.77139e-07	zinc transporter 4 precursor
Soltu.DM.04G029620.1	290.159	1.62979	0.450107	3.62089	0.000293589	0.0070541	conserved hypothetical protein
Soltu.DM.12G000330.1	21.7902	1.62942	0.53798	3.02877	0.00245555	0.0345036	Fatty acid hydroxylase superfamily
Soltu.DM.12G028850.1	27.275	1.60283	0.353489	4.5343	5.77945e-06	0.00031153	hypothetical protein
Soltu.DM.06G008360.1	83.73	1.60093	0.553459	2.8926	0.00382072	0.0469327	casein lytic proteinase B4
Soltu.DM.04G029970.1	49.2802	1.59993	0.327165	4.89029	1.00686e-06	7.49953e-05	UDP-glucosyl transferase 85A3
Soltu.DM.12G003880.1	94.5913	1.589	0.540465	2.94006	0.00328149	0.0421247	Peroxidase superfamily protein
Soltu.DM.02G033310.2	4296.68	1.58692	0.509774	3.11298	0.00185208	0.0279586	WEB family protein At4g27595, chloroplastic
Soltu.DM.12G015100.2	776.731	1.56336	0.519188	3.01117	0.00260244	0.0358814	eukaryotic translation initiation factor 2 gamma subunit
Soltu.DM.10G029290.1	48.4849	1.55657	0.531784	2.92707	0.00342176	0.0433983	squamosa promoter binding protein-like
Soltu.DM.12G024630.1	107.806	1.53499	0.52054	2.94884	0.00318974	0.0413518	Stabilizer of iron transporter SufD / Polynucleotidyl transferase
Soltu.DM.03G016170.1	122.516	1.52958	0.25404	6.02103	1.73311e-09	2.94296e-07	ERECTA-like
Soltu.DM.04G002770.1	412.881	1.5268	0.512904	2.97678	0.00291291	0.0387986	MLP-like protein
Soltu.DM.09G009470.1	38.296	1.52591	0.456887	3.3398	0.000838373	0.0157727	heat shock protein 17.4
Soltu.DM.07G017880.1	82.2781	1.50657	0.499082	3.01868	0.00253876	0.0352255	conserved hypothetical protein
Soltu.DM.07G011640.1	65.9264	1.50007	0.414741	3.61689	0.000298161	0.0071378	polyamine oxidase
Soltu.DM.12G010770.1	43.6386	1.48988	0.517834	2.87714	0.00401293	0.0485477	Leucine-rich repeat transmembrane protein kinase
Soltu.DM.06G022370.1	64.111	1.48866	0.291058	5.11464	3.14344e-07	2.83022e-05	DZC (Disease resistance/zinc finger/chromosome condensation-like region) domain containing protein
Soltu.DM.03G026070.1	74.9062	1.48218	0.390992	3.79082	0.000150153	0.00424587	oleosin
Soltu.DM.12G012410.1	155.888	1.45597	0.500958	2.90636	0.0036566	0.045583	actin-related protein
Soltu.DM.03G002870.1	403.686	1.44661	0.170658	8.47666	2.3176e-17	2.71267e-14	Homeobox-leucine zipper family protein / lipid-binding START domain-containing protein
Soltu.DM.07G014000.1	2202.22	1.44186	0.182197	7.91376	2.49723e-15	1.8187e-12	zinc transporter 5 precursor
Soltu.DM.04G029540.1	49.4199	1.42823	0.369836	3.86179	0.000112561	0.00338437	Protein kinase family protein with leucine-rich repeat domain
Soltu.DM.02G027350.1	105.231	1.42707	0.419732	3.39996	0.000673957	0.0134108	growth-regulating factor
Soltu.DM.08G003530.1	342.269	1.42674	0.248889	5.73245	9.89908e-09	1.38052e-06	growth-regulating factor
Soltu.DM.04G029570.1	21.2339	1.41602	0.42577	3.32579	0.000881685	0.0163714	Protein kinase family protein with leucine-rich repeat domain
Soltu.DM.02G028500.1	517.932	1.41034	0.334448	4.21691	2.47673e-05	0.00104466	F-box/RNI-like superfamily protein
Soltu.DM.10G027350.1	390.276	1.40554	0.361585	3.88717	0.000101421	0.00310457	UDP-glycosyltransferase 73B4
Soltu.DM.09G010290.1	1016.52	1.39909	0.371502	3.76604	0.000165858	0.00455248	serine/threonine protein kinase
Soltu.DM.12G024390.1	223.401	1.38898	0.314705	4.41358	1.01676e-05	0.00050412	Ran BP2/NZF zinc finger-like superfamily protein
Soltu.DM.08G012550.1	317.7	1.38763	0.41378	3.35355	0.00079783	0.0151315	nuclear factor Y, subunit A8
Soltu.DM.09G024970.1	338.063	1.38488	0.367695	3.76638	0.000165633	0.00455138	Plant protein of unknown function (DUF828) with plant pleckstrin homology-like region
Soltu.DM.06G032090.1	134.817	1.3825	0.428076	3.22956	0.0012398	0.020912	josephin protein-related
Soltu.DM.01G008090.1	68.642	1.37237	0.297362	4.61516	3.928e-06	0.000225846	gag-polypeptide of LTR copia-type domain containing protein
Soltu.DM.11G024530.1	438.851	1.36577	0.453424	3.01212	0.00259434	0.0358147	zinc knuckle (CCHC-type) family protein
Soltu.DM.01G025090.1	90.1268	1.35888	0.470038	2.891	0.00384022	0.0471083	phosphate
Soltu.DM.04G024020.1	38.9897	1.35784	0.464758	2.92161	0.00348222	0.0439611	Tetratricopeptide repeat (TPR)-like superfamily protein
Soltu.DM.01G036100.1	579.851	1.35652	0.212731	6.3767	1.80944e-10	3.8507e-08	conserved hypothetical protein
Soltu.DM.11G025880.1	1186.32	1.35557	0.377687	3.58914	0.000331777	0.00776666	RNA binding (RRM/RBD/RNP motifs) family protein
Soltu.DM.10G030190.5	132.149	1.35074	0.41269	3.27302	0.00106406	0.0186684	transcription factor IIIA
Soltu.DM.11G007680.1	495.131	1.33727	0.387788	3.44846	0.000563796	0.0117242	gamete expressed protein
Soltu.DM.08G012530.1	312.794	1.33401	0.43316	3.07972	0.00207194	0.030344	hypothetical protein
Soltu.DM.04G037630.2	1878.12	1.33136	0.252312	5.27663	1.31584e-07	1.32282e-05	BTB/POZ domain-containing protein
Soltu.DM.09G015210.1	20.9504	1.31637	0.428326	3.07329	0.00211715	0.030756	hypothetical protein
Soltu.DM.02G021960.1	161.194	1.31155	0.362835	3.61473	0.000300661	0.0071819	StCLE8
Soltu.DM.10G009180.3	740.422	1.30391	0.344481	3.78514	0.000153621	0.00432156	Protein of unknown function (DUF1639)
Soltu.DM.03G028990.2	100.731	1.29276	0.350198	3.69152	0.000222915	0.00572539	Squamosa promoter-binding protein-like (SBP domain) transcription factor family protein
Soltu.DM.09G020670.2	50.9046	1.2916	0.276855	4.66525	3.08243e-06	0.000185188	Replication protein A interacting middle domain containing protein
Soltu.DM.03G019230.1	62.7195	1.28072	0.428813	2.98666	0.00282044	0.0379451	homeodomain GLABROUS
Soltu.DM.02G010980.1	621.536	1.27386	0.120223	10.5958	3.11526e-26	8.50805e-23	UDP-Glycosyltransferase superfamily protein
Soltu.DM.12G004350.1	283.364	1.27205	0.247669	5.1361	2.80505e-07	2.54654e-05	Mitochondrial substrate carrier family protein
Soltu.DM.03G027810.1	183.721	1.26649	0.274231	4.61832	3.8685e-06	0.000223388	Gibberellin-regulated family protein
Soltu.DM.12G009640.1	180.609	1.26624	0.326277	3.88088	0.00010408	0.00316714	Protein kinase protein with adenine nucleotide alpha hydrolases-like domain
Soltu.DM.02G007120.1	19.4265	1.26328	0.434838	2.90518	0.00367038	0.0456998	conserved hypothetical protein
Soltu.DM.01G035280.2	85.5185	1.26261	0.300293	4.20459	2.61559e-05	0.00109198	L-fucokinase/GDP-L-fucose pyrophosphorylase
Soltu.DM.04G029380.1	33.0863	1.2526	0.410257	3.05322	0.00226404	0.0323873	Protein kinase family protein with leucine-rich repeat domain
Soltu.DM.03G019950.1	88.0347	1.24927	0.320821	3.89399	9.86086e-05	0.00304017	DNA binding
Soltu.DM.06G025210.1	822.46	1.24615	0.399198	3.12164	0.00179846	0.0274144	StIT1
Soltu.DM.01G000470.1	123.869	1.24089	0.173665	7.14532	8.9787e-13	3.46187e-10	NB-ARC domain-containing disease resistance protein
Soltu.DM.10G027580.1	54.9525	1.23742	0.351263	3.52277	0.000427061	0.00945041	hypothetical protein
Soltu.DM.01G032710.1	64.1179	1.23167	0.295286	4.17111	3.03114e-05	0.00122506	AGAMOUS-like
Soltu.DM.06G021300.1	56.5554	1.22716	0.380893	3.2218	0.00127386	0.0213111	O-methyltransferase family protein
Soltu.DM.07G024340.1	172.469	1.22052	0.21906	5.5716	2.52405e-08	3.13336e-06	hypothetical protein
Soltu.DM.04G032220.1	750.184	1.22017	0.205554	5.93599	2.92069e-09	4.73861e-07	growth-regulating factor
Soltu.DM.08G014810.1	412.83	1.21213	0.244203	4.96359	6.92014e-07	5.57233e-05	Leucine-rich receptor-like protein kinase family protein
Soltu.DM.03G006260.1	1165.33	1.21063	0.188969	6.40648	1.48917e-10	3.25364e-08	GNS1/SUR4 membrane protein family
Soltu.DM.09G025290.1	33.3243	1.21052	0.396424	3.0536	0.00226116	0.0323602	ATPase E1-E2 type family protein / haloacid dehalogenase-like hydrolase family protein
Soltu.DM.07G004510.1	120.226	1.20861	0.39658	3.04759	0.00230682	0.0328702	MLP-like protein
Soltu.DM.02G029630.1	93.829	1.20795	0.315253	3.83168	0.00012727	0.00371747	Prolyl oligopeptidase family protein
Soltu.DM.01G032700.1	564.325	1.20342	0.241736	4.97822	6.4173e-07	5.23169e-05	MADS BOX
Soltu.DM.12G027220.1	83.5893	1.20181	0.308813	3.89171	9.95399e-05	0.003066	UDP-glucosyltransferase 73B2
Soltu.DM.04G035090.1	294.454	1.20174	0.249617	4.81433	1.47694e-06	0.000102334	C2H2-like zinc finger protein
Soltu.DM.03G015760.1	284.183	1.1952	0.315264	3.79111	0.000149978	0.00424458	Leucine-rich repeat protein kinase family protein
Soltu.DM.04G029530.1	59.2208	1.19444	0.38219	3.12525	0.00177657	0.0271818	Protein kinase family protein with leucine-rich repeat domain
Soltu.DM.12G003390.1	155.926	1.1915	0.212726	5.6011	2.12994e-08	2.72242e-06	Disease resistance protein (CC-NBS-LRR class) family
Soltu.DM.07G016230.1	515.517	1.15697	0.281657	4.10773	3.99558e-05	0.00150865	RNAse II-like
Soltu.DM.02G029480.1	55.1012	1.15325	0.367753	3.13593	0.00171309	0.0264327	Dof-type zinc finger DNA-binding family protein
Soltu.DM.08G022140.1	482.752	1.14934	0.172156	6.67616	2.45278e-11	6.69875e-09	homeodomain GLABROUS
Soltu.DM.06G010390.1	39.5304	1.14649	0.357087	3.21067	0.00132424	0.0219299	Development and cell death domain containing protein
Soltu.DM.02G003240.3	3548.51	1.14582	0.349825	3.27541	0.0010551	0.0185607	cell elongation protein / DWARF1 / DIMINUTO (DIM)
Soltu.DM.01G034120.1	61.4071	1.14519	0.322896	3.54662	0.000390202	0.00880117	AGAMOUS-like
Soltu.DM.06G008370.1	419.811	1.14144	0.244045	4.67716	2.90875e-06	0.000176644	casein lytic proteinase B4
Soltu.DM.08G029240.2	441.024	1.13044	0.359902	3.14096	0.00168397	0.026094	conserved hypothetical protein
Soltu.DM.01G045600.1	26.2543	1.12904	0.346821	3.2554	0.00113232	0.0195496	DNA polymerase V family
Soltu.DM.04G030580.1	225.445	1.11344	0.275444	4.04234	5.29215e-05	0.00186896	homeobox protein
Soltu.DM.03G036380.1	380.925	1.11208	0.29626	3.75374	0.000174218	0.00471481	Glucose-methanol-choline (GMC) oxidoreductase family protein
Soltu.DM.04G019270.1	190.914	1.10614	0.314931	3.51232	0.000444205	0.00970359	RNA-binding (RRM/RBD/RNP motifs) family protein
Soltu.DM.01G000480.1	121.951	1.10525	0.226067	4.88903	1.01335e-06	7.53076e-05	NB-ARC domain-containing disease resistance protein
Soltu.DM.03G029790.2	399.712	1.09621	0.271993	4.03028	5.57116e-05	0.00193415	actin binding
Soltu.DM.09G000990.2	969.812	1.09297	0.1891	5.77982	7.47794e-09	1.0844e-06	chaperone protein dnaJ-related
Soltu.DM.07G020040.2	279.348	1.09193	0.364329	2.99709	0.00272571	0.0372362	RING 1A
Soltu.DM.01G000450.1	190.901	1.07535	0.154789	6.94722	3.72567e-12	1.31292e-09	NB-ARC domain-containing disease resistance protein
Soltu.DM.09G006120.1	174.23	1.07368	0.245818	4.36779	1.25513e-05	0.000598752	C2H2-like zinc finger protein
Soltu.DM.11G004160.1	4067.44	1.06169	0.262419	4.0458	5.21442e-05	0.00185148	dicer-like
Soltu.DM.12G029310.1	111.747	1.06105	0.340265	3.1183	0.00181896	0.0276273	P-loop containing nucleoside triphosphate hydrolases superfamily protein
Soltu.DM.03G027850.1	45.5226	1.05352	0.355342	2.9648	0.00302876	0.0398961	Calmodulin-binding protein
Soltu.DM.05G026120.1	128.989	1.04788	0.353184	2.96696	0.00300764	0.0397137	Protein of unknown function (DUF1997)
Soltu.DM.02G014340.2	277.548	1.04631	0.1373	7.6206	2.52504e-14	1.65506e-11	Ribosomal protein L32e
Soltu.DM.05G001800.1	167.515	1.04352	0.358264	2.91271	0.00358312	0.0448376	conserved hypothetical protein
Soltu.DM.03G026590.2	369.519	1.04202	0.337071	3.0914	0.00199214	0.0295806	Mpp10 protein domain containing protein
Soltu.DM.01G004810.1	52.4985	1.03761	0.231026	4.49129	7.07935e-06	0.000371813	homolog of X-ray repair cross complementing 2 (XRCC2)
Soltu.DM.10G027890.1	55.9822	1.0325	0.273336	3.7774	0.000158474	0.00442552	RAD3-like DNA-binding helicase protein
Soltu.DM.01G001720.2	385.629	1.03226	0.161177	6.40455	1.50814e-10	3.27326e-08	rRNA processing protein-related
Soltu.DM.10G020100.1	124.194	1.02369	0.183614	5.57522	2.47215e-08	3.09351e-06	glyoxal oxidase-related protein
Soltu.DM.03G017090.1	386.373	1.01673	0.237363	4.28345	1.84021e-05	0.00081942	Homeobox-leucine zipper family protein / lipid-binding START domain-containing protein
Soltu.DM.03G025860.2	3997.15	1.01346	0.322301	3.14446	0.00166396	0.0258695	ubiquitin-associated (UBA)/TS-N domain-containing protein / octicosapeptide/Phox/Bemp1 (PB1) domain-containing protein
Soltu.DM.01G047300.1	363.908	1.01331	0.33784	2.99939	0.00270523	0.0370027	Plant protein of unknown function (DUF869)
Soltu.DM.10G005300.1	158.012	1.00786	0.182504	5.52241	3.34381e-08	4.01417e-06	Basic helix-loop-helix (bHLH) DNA-binding family protein
Soltu.DM.05G001770.1	663.192	1.00617	0.125293	8.03055	9.70368e-16	7.39578e-13	transducin family protein / WD-40 repeat family protein
Soltu.DM.09G028840.1	1410.11	1.00136	0.162695	6.15483	7.5157e-10	1.42377e-07	Cyclin-dependent kinase inhibitor family protein
Soltu.DM.01G037550.1	545.394	1.00075	0.137545	7.2758	3.44374e-13	1.48502e-10	RNA binding
Soltu.DM.03G018160.1	158.057	1.00058	0.253372	3.94905	7.84627e-05	0.00252104	DWNN domain, a CCHC-type zinc finger
Soltu.DM.10G026450.2	81.4562	-9.85715	2.08938	-4.71773	2.38491e-06	0.000150309	beta-6 tubulin
Soltu.DM.04G019570.1	72.3331	-9.6853	3.14266	-3.08188	0.00205698	0.0302032	Haem oxygenase-like, multi-helical
Soltu.DM.12G024540.1	61.6743	-9.4544	1.56414	-6.04448	1.49892e-09	2.57194e-07	hypothetical protein
Soltu.DM.10G027090.1	56.8039	-9.33667	3.18058	-2.93552	0.00332988	0.0425458	adenylosuccinate synthase
Soltu.DM.01G019500.1	49.1247	-9.12699	2.1404	-4.26415	2.00665e-05	0.000874521	PAS domain-containing protein tyrosine kinase family protein
Soltu.DM.06G022280.2	114.027	-8.97112	1.54886	-5.79209	6.9517e-09	1.02625e-06	exocyst subunit exo70 family protein D3
Soltu.DM.05G026850.2	43.1921	-8.94285	1.24866	-7.16194	7.95449e-13	3.17918e-10	Aldolase-type TIM barrel family protein
Soltu.DM.12G024570.1	37.5878	-8.73938	1.51034	-5.78638	7.19175e-09	1.05221e-06	hypothetical protein
Soltu.DM.01G051670.3	36.2698	-8.68824	1.19812	-7.25156	4.1199e-13	1.68777e-10	NAD(P)-binding Rossmann-fold superfamily protein
Soltu.DM.12G012240.1	34.7785	-8.62822	1.46459	-5.89122	3.83361e-09	6.09898e-07	hypothetical protein
Soltu.DM.12G002200.1	34.8168	-8.62437	1.14515	-7.53118	5.02825e-14	3.05168e-11	Pollen Ole e 1 allergen and extensin family protein
Soltu.DM.08G015650.3	33.4029	-8.57098	2.1554	-3.97652	6.99321e-05	0.00230109	Tesmin/TSO1-like CXC domain-containing protein
Soltu.DM.03G020100.1	30.3261	-8.43095	2.38553	-3.5342	0.000409006	0.00914348	Nodulin MtN3 family protein
Soltu.DM.10G006690.1	29.619	-8.39614	1.29914	-6.46283	1.0276e-10	2.35507e-08	isopentenyltransferase
Soltu.DM.12G024560.1	117.476	-8.34283	1.30443	-6.39576	1.59751e-10	3.44443e-08	hypothetical protein
Soltu.DM.02G030220.1	28.3334	-8.33192	2.33549	-3.56752	0.000360379	0.00827081	Late embryogenesis abundant protein (LEA) family protein
Soltu.DM.12G000090.1	26.9012	-8.25821	1.76879	-4.66885	3.02891e-06	0.000183149	2-oxoglutarate (2OG) and Fe(II)-dependent oxygenase superfamily protein
Soltu.DM.08G014770.1	26.166	-8.2155	1.12217	-7.32107	2.45999e-13	1.08948e-10	hypothetical protein
Soltu.DM.10G023180.2	67.8147	-8.07711	2.77794	-2.90759	0.00364227	0.0454736	rubisco activase
Soltu.DM.09G015950.1	23.1897	-8.04542	1.09872	-7.32254	2.43326e-13	1.08948e-10	hypothetical protein
Soltu.DM.04G025170.1	23.2395	-8.04318	1.27262	-6.32018	2.61255e-10	5.45358e-08	hypothetical protein
Soltu.DM.04G038230.1	22.5588	-8.00411	2.19669	-3.64372	0.000268723	0.00658702	Protein of unknown function, DUF547
Soltu.DM.08G026280.2	20.2029	-7.84658	2.2341	-3.51219	0.000444423	0.00970359	ACC synthase
Soltu.DM.05G007410.1	19.761	-7.80767	1.22566	-6.37016	1.88832e-10	3.99264e-08	hypothetical protein
Soltu.DM.07G010780.1	18.7045	-7.72801	1.14622	-6.74216	1.56047e-11	4.60732e-09	Pyridoxal phosphate phosphatase-related protein
Soltu.DM.01G035570.3	18.3936	-7.70895	2.26121	-3.40922	0.000651495	0.0130804	hypothetical protein
Soltu.DM.08G001190.1	18.1139	-7.68918	1.61903	-4.74924	2.04186e-06	0.000133303	expansin-like B1
Soltu.DM.04G002140.3	17.9136	-7.66985	2.4063	-3.1874	0.0014356	0.0231626	Plant protein of unknown function (DUF639)
Soltu.DM.06G018860.2	16.5786	-7.56014	2.30542	-3.2793	0.00104066	0.0183732	WWE protein-protein interaction domain protein family
Soltu.DM.05G005160.1	16.1268	-7.52305	1.2411	-6.06161	1.34765e-09	2.36184e-07	hypothetical protein
Soltu.DM.11G012330.1	15.9098	-7.49946	2.32326	-3.22799	0.00124664	0.020983	DEAD/DEAH box RNA helicase family protein
Soltu.DM.01G008530.1	15.1907	-7.43256	2.31671	-3.20823	0.00133553	0.0220611	conserved hypothetical protein
Soltu.DM.11G013670.1	14.6503	-7.38107	1.36433	-5.41005	6.30077e-08	7.16997e-06	hypothetical protein
Soltu.DM.07G014700.1	13.7675	-7.29041	1.37729	-5.29331	1.20122e-07	1.21881e-05	hypothetical protein
Soltu.DM.12G024620.1	13.6956	-7.28064	1.52486	-4.77464	1.80031e-06	0.000119922	hypothetical protein
Soltu.DM.09G003390.1	12.6608	-7.17223	2.23322	-3.21161	0.00131991	0.0219025	Jojoba acyl CoA reductase-related male sterility protein
Soltu.DM.09G000280.1	11.6601	-7.05296	1.40774	-5.01014	5.43908e-07	4.57064e-05	wall-associated kinase
Soltu.DM.05G020520.1	11.6369	-7.04976	2.26064	-3.11848	0.00181786	0.0276273	Nucleic acid-binding, OB-fold-like protein
Soltu.DM.02G014800.1	11.5701	-7.04193	2.25946	-3.11665	0.00182921	0.0277155	K-box region and MADS-box transcription factor family protein
Soltu.DM.07G019620.1	11.4812	-7.03153	1.38787	-5.06641	4.05397e-07	3.52416e-05	Regulator of Vps4 activity in the MVB pathway protein
Soltu.DM.06G000270.1	11.2051	-6.99719	2.23074	-3.13671	0.00170854	0.0263749	myb domain protein
Soltu.DM.09G001390.1	11.1013	-6.97988	1.39842	-4.99127	5.99842e-07	4.9643e-05	glutathione S-transferase TAU
Soltu.DM.09G003430.1	10.4953	-6.90285	1.40956	-4.89716	9.72304e-07	7.31397e-05	Jojoba acyl CoA reductase-related male sterility protein
Soltu.DM.07G002710.2	26.7736	-6.89901	2.1195	-3.25501	0.00113388	0.0195533	S-adenosyl-L-methionine-dependent methyltransferases superfamily protein
Soltu.DM.09G029840.1	10.3531	-6.87558	1.31378	-5.23344	1.66387e-07	1.60856e-05	UDP-Glycosyltransferase superfamily protein
Soltu.DM.07G007380.1	9.97068	-6.82417	1.46605	-4.65481	3.2428e-06	0.000192181	Plant transposase (Ptta/En/Spm family) domain containing protein
Soltu.DM.06G018630.1	9.60955	-6.76338	1.2731	-5.31251	1.08125e-07	1.11956e-05	hypothetical protein
Soltu.DM.04G036360.1	9.42074	-6.73825	1.36557	-4.93439	8.0401e-07	6.23628e-05	hypothetical protein
Soltu.DM.01G037870.1	9.31925	-6.72317	1.37231	-4.89915	9.62508e-07	7.30191e-05	chitin elicitor receptor kinase
Soltu.DM.09G010490.1	9.30463	-6.72303	1.35539	-4.96021	7.04175e-07	5.64253e-05	glutathione S-transferase TAU
Soltu.DM.05G016960.1	9.17741	-6.69634	1.62818	-4.11277	3.90947e-05	0.00148983	hypothetical protein
Soltu.DM.12G024550.1	85.5782	-6.6586	1.17744	-5.65514	1.55717e-08	2.07452e-06	hypothetical protein
Soltu.DM.03G036520.1	257.602	-6.52101	0.965807	-6.75188	1.45943e-11	4.37444e-09	glyoxylate reductase
Soltu.DM.12G012490.1	8.03388	-6.50263	1.49252	-4.35682	1.31965e-05	0.000624083	potassium channel in Arabidopsis thaliana
Soltu.DM.04G033120.1	7.54735	-6.4315	1.47583	-4.35789	1.31324e-05	0.000621947	cytochrome P450, family 81, subfamily K, polypeptide
Soltu.DM.06G032740.1	7.61243	-6.42733	1.45782	-4.40885	1.03922e-05	0.000513267	LOB domain-containing protein
Soltu.DM.02G004780.1	7.00649	-6.32446	1.3155	-4.80764	1.52721e-06	0.00010493	hypothetical protein
Soltu.DM.09G028090.1	6.79846	-6.2857	1.81609	-3.46111	0.000537943	0.0113158	Disease resistance-responsive (dirigent-like protein) family protein
Soltu.DM.04G029940.1	6.89378	-6.28422	1.36186	-4.61446	3.94128e-06	0.000226213	UDP-glucosyl transferase 85A5
Soltu.DM.09G007890.2	6.78855	-6.28294	1.34798	-4.66102	3.14648e-06	0.000188175	hypothetical protein
Soltu.DM.10G009110.1	6.47077	-6.19373	1.37262	-4.51235	6.4113e-06	0.0003411	hypothetical protein
Soltu.DM.01G032200.1	6.37565	-6.17943	1.35738	-4.55247	5.30194e-06	0.000290579	growth-regulating factor
Soltu.DM.09G027630.1	6.3893	-6.17593	1.51164	-4.08559	4.39651e-05	0.0016281	isopropyl malate isomerase large subunit
Soltu.DM.09G030560.1	6.34194	-6.16189	1.41119	-4.36644	1.2629e-05	0.00060071	Sar8.2 family domain containing protein
Soltu.DM.01G049040.1	5.77618	-6.02809	1.60459	-3.75678	0.000172112	0.00467714	Bifunctional inhibitor/lipid-transfer protein/seed storage 2S albumin superfamily protein
Soltu.DM.12G012250.1	5.49744	-5.96588	1.81911	-3.27956	0.0010397	0.0183732	hypothetical protein
Soltu.DM.04G032360.2	94.2641	-5.93536	2.06129	-2.87944	0.00398384	0.0483565	serine carboxypeptidase-like
Soltu.DM.02G028650.1	5.26854	-5.9101	1.59148	-3.71358	0.000204345	0.00534122	MuDR family transposase domain containing protein
Soltu.DM.12G000300.1	5.26103	-5.90231	1.3332	-4.42719	9.54699e-06	0.000479805	cytochrome P450, family 71, subfamily A, polypeptide
Soltu.DM.11G005210.2	8.7476	-5.8857	1.88648	-3.11993	0.00180894	0.0275485	hypothetical protein
Soltu.DM.06G032220.1	5.08452	-5.85965	1.62772	-3.59992	0.000318315	0.00751054	Undecaprenyl pyrophosphate synthetase family protein
Soltu.DM.02G024450.2	18.2022	-5.83055	1.63663	-3.56252	0.000367305	0.00838864	aldehyde dehydrogenase 3F1
Soltu.DM.07G017110.1	4.88405	-5.78597	1.39872	-4.13661	3.52476e-05	0.0013752	hypothetical protein
Soltu.DM.12G019920.1	12.5331	-5.67597	1.19274	-4.75876	1.94789e-06	0.000128189	hypothetical protein
Soltu.DM.09G021150.1	4.2208	-5.57526	1.53529	-3.6314	0.000281883	0.00682285	2-oxoglutarate (2OG) and Fe(II)-dependent oxygenase superfamily protein
Soltu.DM.01G048280.1	4.21681	-5.57081	1.49067	-3.73713	0.000186132	0.00498375	methyl esterase
Soltu.DM.08G002350.1	233.487	-5.47984	1.65221	-3.31668	0.000910924	0.0167365	transcriptional factor B3 family protein
Soltu.DM.04G018120.1	35.0228	-5.32507	1.77887	-2.99351	0.0027579	0.0374263	elicitor-activated gene 3-1
Soltu.DM.02G024610.1	24.6354	-5.31236	1.33494	-3.97948	6.90673e-05	0.0022795	Peroxidase superfamily protein
Soltu.DM.04G025160.2	9.40598	-5.2422	1.27346	-4.11651	3.84645e-05	0.00147094	cytochrome P450, family 71, subfamily B, polypeptide
Soltu.DM.01G041220.3	20.9683	-5.22275	1.62221	-3.21952	0.00128404	0.0214594	Pectinacetylesterase family protein
Soltu.DM.01G033580.1	27.2768	-5.22	1.32604	-3.93653	8.26667e-05	0.00263288	TTF-type zinc finger protein with HAT dimerisation domain
Soltu.DM.09G028100.1	8.79952	-5.13656	1.44199	-3.56214	0.000367843	0.00839508	F-box and associated interaction domains-containing protein
Soltu.DM.06G014560.1	24.3804	-5.02026	1.16402	-4.31288	1.61144e-05	0.000737594	acetyl Co-enzyme a carboxylase carboxyltransferase alpha subunit
Soltu.DM.04G026420.1	13.4285	-4.96572	1.58204	-3.13881	0.00169636	0.0262239	extensin
Soltu.DM.09G023200.1	60.7328	-4.91818	0.91409	-5.38041	7.43153e-08	8.31241e-06	hypothetical protein
Soltu.DM.08G002180.1	222.971	-4.89097	0.603789	-8.10047	5.4748e-16	4.72173e-13	Uridine diphosphate glycosyltransferase 74E2
Soltu.DM.09G029780.1	4.37074	-4.88549	1.40387	-3.48002	0.000501375	0.0106699	UDP-glucosyl transferase 75B2
Soltu.DM.03G037500.1	3.98123	-4.73067	1.51353	-3.1256	0.00177445	0.0271621	hypothetical protein
Soltu.DM.01G020460.4	52.4675	-4.65699	1.22749	-3.79392	0.000148285	0.00420029	Protein phosphatase 2C family protein
Soltu.DM.12G023540.1	42.5566	-4.60409	0.949608	-4.84841	1.24456e-06	8.8863e-05	RPM1-interacting protein 4 (RIN4) family protein
Soltu.DM.02G006200.1	105.587	-4.54885	1.51133	-3.00983	0.00261395	0.0360248	Dehydrin domain containing protein
Soltu.DM.07G000610.4	91.2145	-4.54778	0.810191	-5.61323	1.9859e-08	2.57248e-06	Arabidopsis thaliana protein of unknown function (DUF794)
Soltu.DM.05G022040.1	7.68395	-4.50421	1.36208	-3.30686	0.000943472	0.0171589	hypothetical protein
Soltu.DM.05G003620.1	75.4345	-4.43675	0.505883	-8.77031	1.78179e-18	2.33578e-15	hypothetical protein
Soltu.DM.02G023710.8	7.85199	-4.32508	1.47167	-2.93889	0.0032939	0.0422674	oligopeptide transporter
Soltu.DM.07G003560.1	1365	-4.3204	0.798488	-5.41072	6.27711e-08	7.16793e-06	blue-copper-binding protein
Soltu.DM.05G022470.1	22.4458	-4.28048	1.39808	-3.06168	0.00220099	0.0317673	TRICHOME BIREFRINGENCE-LIKE
Soltu.DM.04G025090.1	9.61423	-4.26646	1.33176	-3.20363	0.00135707	0.0222934	cytochrome P450, family 71, subfamily B, polypeptide
Soltu.DM.10G028100.1	6.97686	-4.22298	1.27792	-3.30458	0.000951174	0.0172607	UDP-glucosyl transferase 74D1
Soltu.DM.11G026610.1	6.27555	-4.17555	1.25166	-3.33601	0.000849894	0.0159345	Domain of unknown function (DUF966)
Soltu.DM.08G015680.4	62.0005	-4.13782	1.05254	-3.93129	8.44923e-05	0.00268581	alpha/beta-Hydrolases superfamily protein
Soltu.DM.04G027530.1	20.2406	-4.10965	1.03489	-3.9711	7.15409e-05	0.00233993	cytochrome P450, family 98, subfamily A, polypeptide
Soltu.DM.03G029790.5	57.4996	-4.06444	0.84463	-4.81209	1.4936e-06	0.000103108	actin binding
Soltu.DM.05G019270.1	557.315	-3.99761	0.713416	-5.60347	2.101e-08	2.70023e-06	cytochrome p450 78a9
Soltu.DM.08G027090.1	15.3265	-3.98488	0.974098	-4.09084	4.29822e-05	0.00160439	hapless
Soltu.DM.07G012860.1	5.45811	-3.97791	1.31899	-3.01587	0.00256241	0.0354668	Polynucleotidyl transferase, ribonuclease H-like superfamily protein
Soltu.DM.12G003800.1	13.5299	-3.89715	1.3245	-2.94235	0.00325729	0.0419455	conserved hypothetical protein
Soltu.DM.03G032420.1	16.1567	-3.88113	1.10408	-3.51526	0.000439318	0.00966292	floral meristem identity control protein LEAFY (LFY)
Soltu.DM.01G001600.1	90.0942	-3.8271	0.769915	-4.97081	6.66727e-07	5.40857e-05	Family of unknown function (DUF716)
Soltu.DM.03G036190.1	16.6206	-3.82354	1.31095	-2.91661	0.00353857	0.0444499	phosphate starvation-induced gene
Soltu.DM.04G027470.1	1132.12	-3.79408	1.02455	-3.70316	0.000212927	0.00551204	Cytochrome P450 superfamily protein
Soltu.DM.09G029890.1	7.5711	-3.78058	1.14558	-3.30013	0.000966383	0.0174305	UDP-glucosyl transferase 75B2
Soltu.DM.04G031930.1	235.035	-3.66626	0.307863	-11.9087	1.06594e-32	8.73354e-29	Homeobox-leucine zipper protein family
Soltu.DM.12G007050.1	23.4926	-3.65039	0.991165	-3.68293	0.000230569	0.00587135	Domain of unknown function (DUF303)
Soltu.DM.06G004520.1	30.8399	-3.6472	1.13762	-3.206	0.00134596	0.0221886	Protein of unknown function (DUF3755)
Soltu.DM.09G031020.1	108.991	-3.63699	0.925484	-3.92983	8.50076e-05	0.00269435	UDP-Glycosyltransferase superfamily protein
Soltu.DM.06G031100.1	12.0335	-3.61465	1.1102	-3.25585	0.00113055	0.019537	Disease resistance-responsive (dirigent-like protein) family protein
Soltu.DM.08G028610.1	51.8089	-3.61356	0.747846	-4.83196	1.35197e-06	9.50818e-05	POZ/BTB containin G-protein
Soltu.DM.05G007320.1	34.1548	-3.60732	0.762144	-4.73311	2.21101e-06	0.000141526	hypothetical protein
Soltu.DM.09G001400.1	200.442	-3.60076	0.835925	-4.30751	1.65101e-05	0.000751506	glutathione S-transferase TAU
Soltu.DM.12G000290.1	8.9241	-3.60006	1.10642	-3.2538	0.00113872	0.0196108	NAD(P)-binding Rossmann-fold superfamily protein
Soltu.DM.01G024150.1	7.99224	-3.58396	1.22698	-2.92095	0.00348965	0.044021	Eukaryotic aspartyl protease family protein
Soltu.DM.09G001410.1	154.404	-3.53805	0.977287	-3.62028	0.000294289	0.00706574	glutathione S-transferase TAU
Soltu.DM.12G020880.1	6.15707	-3.51011	1.06455	-3.29729	0.000976234	0.0175599	MADS-box transcription factor family protein
Soltu.DM.12G024650.1	48.9679	-3.42502	0.89114	-3.84341	0.000121338	0.00359224	hypothetical protein
Soltu.DM.03G018430.1	138.328	-3.37252	0.794444	-4.24513	2.18465e-05	0.0009396	Kunitz family trypsin and protease inhibitor protein
Soltu.DM.01G045910.1	283.922	-3.30388	0.623186	-5.3016	1.1479e-07	1.17197e-05	basic pathogenesis-related protein
Soltu.DM.02G012590.1	39.9371	-3.30192	1.0827	-3.0497	0.00229068	0.0326971	cytochrome P450, family 716, subfamily A, polypeptide
Soltu.DM.03G022740.2	327.629	-3.2923	0.914831	-3.59881	0.000319681	0.00753735	Protein phosphatase 2C family protein
Soltu.DM.06G019040.1	15.6776	-3.24734	0.852183	-3.81061	0.000138625	0.00398174	hypothetical protein
Soltu.DM.12G000510.2	126.04	-3.24497	0.921463	-3.52154	0.000429046	0.00947516	2-oxoglutarate (2OG) and Fe(II)-dependent oxygenase superfamily protein
Soltu.DM.01G044690.1	32.5524	-3.16861	0.753319	-4.20621	2.59694e-05	0.00108697	hypothetical protein
Soltu.DM.03G028950.1	21.7407	-3.15719	0.804899	-3.92246	8.76483e-05	0.00277268	Adenine nucleotide alpha hydrolases-like superfamily protein
Soltu.DM.12G007580.1	384.604	-3.15053	0.964396	-3.26684	0.00108755	0.0189788	NAD(P)-binding Rossmann-fold superfamily protein
Soltu.DM.10G019450.1	990.274	-3.12344	0.82646	-3.7793	0.00015727	0.00440532	Thiamine pyrophosphate dependent pyruvate decarboxylase family protein
Soltu.DM.11G005760.1	169.396	-3.12206	0.600928	-5.19539	2.04288e-07	1.91892e-05	UDP-Glycosyltransferase superfamily protein
Soltu.DM.07G010520.1	30.2237	-3.08407	0.52904	-5.82957	5.55702e-09	8.55025e-07	conserved hypothetical protein
Soltu.DM.08G014270.2	19.8727	-3.07077	0.834585	-3.6794	0.000233783	0.00592557	phosphofructokinase
Soltu.DM.04G024320.1	81.879	-3.04605	0.687888	-4.42812	9.50585e-06	0.000478549	Transducin/WD40 repeat-like superfamily protein
Soltu.DM.01G022390.2	45.7552	-3.0384	0.973286	-3.12179	0.00179752	0.0274128	Protein kinase superfamily protein
Soltu.DM.12G007570.1	101.994	-3.02184	1.03875	-2.90913	0.00362441	0.0452851	NAD(P)-binding Rossmann-fold superfamily protein
Soltu.DM.04G031910.1	36.9921	-3.00718	0.969935	-3.10039	0.00193263	0.0289083	glycosyl hydrolase family 10 protein / carbohydrate-binding domain-containing protein
Soltu.DM.05G010910.1	34.4254	-3.00697	1.01252	-2.96979	0.00298006	0.0394448	basic helix-loop-helix (bHLH) DNA-binding superfamily protein
Soltu.DM.12G001440.1	299.883	-26.0096	3.38351	-7.68716	1.50441e-14	1.0062e-11	Eukaryotic family of unknown function (DUF1754) domain containing protein
Soltu.DM.02G025200.1	208.071	-25.5124	3.38357	-7.54007	4.6971e-14	2.90449e-11	GRAS family transcription factor
Soltu.DM.04G035290.1	180.864	-25.3117	3.3836	-7.48069	7.39323e-14	4.17756e-11	hypothetical protein
Soltu.DM.08G023050.2	154.003	-25.1017	3.38364	-7.41854	1.1842e-13	6.25965e-11	CheY-like two-component responsive regulator family protein
Soltu.DM.07G024420.3	145.672	-25.0231	3.38366	-7.39528	1.41109e-13	7.22589e-11	silencing defective
Soltu.DM.02G034690.1	143.553	-24.9825	3.38366	-7.38329	1.54428e-13	7.66828e-11	Protein of unknown function (DUF803)
Soltu.DM.09G009500.2	66.9063	-23.9619	3.14698	-7.61426	2.65213e-14	1.69068e-11	SCAR homolog
Soltu.DM.12G004240.2	106.569	-23.1432	3.07671	-7.52206	5.39186e-14	3.15549e-11	breast basic conserved
Soltu.DM.11G005210.1	22.6892	-2.99697	0.728392	-4.1145	3.88028e-05	0.00148042	hypothetical protein
Soltu.DM.01G035890.1	34.5133	-2.9768	0.708972	-4.19876	2.68383e-05	0.00111149	nuclear factor Y, subunit C11
Soltu.DM.11G025590.4	107.907	-2.97173	0.975272	-3.04708	0.00231078	0.0329056	NAD(P)-binding Rossmann-fold superfamily protein
Soltu.DM.06G009010.1	36.5054	-2.95695	0.880223	-3.35932	0.000781339	0.0149167	expansin A4
Soltu.DM.02G016940.1	233.809	-2.91875	0.707164	-4.12741	3.66878e-05	0.00141622	Seven transmembrane MLO family protein
Soltu.DM.05G022700.1	276.404	-2.91503	0.391955	-7.43715	1.02878e-13	5.61939e-11	HXXXD-type acyl-transferase family protein
Soltu.DM.05G023730.1	404.066	-2.91293	0.713517	-4.08249	4.45553e-05	0.00164603	pleiotropic drug resistance
Soltu.DM.03G002490.1	1025.83	-2.90918	0.158343	-18.3726	2.17663e-75	3.56673e-71	Peroxidase superfamily protein
Soltu.DM.05G015800.2	20.7595	-2.90816	0.715847	-4.06255	4.85395e-05	0.00174811	hypothetical protein
Soltu.DM.03G011570.1	34.7284	-2.88767	0.935858	-3.08558	0.00203156	0.0299548	HXXXD-type acyl-transferase family protein
Soltu.DM.07G026670.1	10.3242	-2.87558	0.918945	-3.12922	0.00175271	0.0269299	hypothetical protein
Soltu.DM.08G002250.1	229.031	-2.85696	0.59377	-4.81156	1.49756e-06	0.000103108	UDP-Glycosyltransferase superfamily protein
Soltu.DM.11G005440.1	515.541	-2.83066	0.537212	-5.26917	1.3704e-07	1.36927e-05	UDP-Glycosyltransferase superfamily protein
Soltu.DM.08G023080.1	10.4611	-2.78251	0.69556	-4.00038	6.32408e-05	0.00212923	hypothetical protein
Soltu.DM.07G016460.1	222.012	-2.77221	0.866458	-3.19947	0.00137681	0.0225161	glutathione S-transferase TAU
Soltu.DM.02G022850.4	71.3395	-2.7619	0.95692	-2.88624	0.00389877	0.0475883	serine acetyltransferase 3
Soltu.DM.06G018780.1	54.0727	-2.74064	0.809113	-3.38721	0.00070607	0.0138706	UDP-glycosyltransferase 73B4
Soltu.DM.11G005750.1	231.263	-2.72696	0.661677	-4.12129	3.7676e-05	0.00144754	UDP-Glycosyltransferase superfamily protein
Soltu.DM.07G001890.1	187.493	-2.72009	0.798992	-3.4044	0.000663089	0.0132347	Protein kinase superfamily protein
Soltu.DM.06G002370.1	13.7361	-2.71839	0.694149	-3.91615	8.99734e-05	0.00283633	conserved hypothetical protein
Soltu.DM.04G000850.1	20.6529	-2.71446	0.709547	-3.82563	0.000130439	0.00379531	conserved hypothetical protein
Soltu.DM.01G051720.1	59.3336	-2.6691	0.772372	-3.45571	0.000548839	0.011486	flavin-dependent monooxygenase
Soltu.DM.01G040260.1	62.3537	-2.6677	0.903515	-2.95258	0.00315135	0.0409838	KNOTTED-like from Arabidopsis thaliana
Soltu.DM.02G016780.1	33.443	-2.61856	0.812006	-3.2248	0.0012606	0.0211648	alpha/beta-Hydrolases superfamily protein
Soltu.DM.07G002650.1	778.116	-2.60483	0.444113	-5.86524	4.48487e-09	7.03266e-07	Carboxypeptidase A inhibitor domain containing protein
Soltu.DM.09G022510.1	13.846	-2.59236	0.653074	-3.96947	7.20325e-05	0.00234664	DNA binding
Soltu.DM.07G016420.3	112.346	-2.58652	0.561042	-4.61021	4.02256e-06	0.000230072	Major facilitator superfamily protein
Soltu.DM.04G025100.1	35.9996	-2.58095	0.375721	-6.86933	6.45052e-12	2.15717e-09	cytochrome P450, family 71, subfamily A, polypeptide
Soltu.DM.10G018870.1	5269.6	-2.58043	0.594597	-4.33979	1.42618e-05	0.000666764	lipid transfer protein
Soltu.DM.03G036150.1	157.578	-2.56615	0.441471	-5.81273	6.14605e-09	9.22549e-07	phosphate starvation-induced gene
Soltu.DM.11G002810.1	9.94878	-2.55545	0.79578	-3.21125	0.00132157	0.0219189	UDP-Glycosyltransferase superfamily protein
Soltu.DM.03G021530.1	16.9844	-2.54642	0.832918	-3.05723	0.00223392	0.0320825	hypothetical protein
Soltu.DM.05G001060.1	48.8716	-2.54512	0.568067	-4.48031	7.45342e-06	0.000387394	K-box region and MADS-box transcription factor family protein
Soltu.DM.08G002190.1	1019.13	-2.52619	0.21455	-11.7744	5.29055e-32	3.46775e-28	Uridine diphosphate glycosyltransferase 74E2
Soltu.DM.08G006030.1	51.0895	-2.50839	0.463735	-5.4091	6.33411e-08	7.18297e-06	HXXXD-type acyl-transferase family protein
Soltu.DM.02G012470.3	154.93	-2.50558	0.630286	-3.97531	7.0289e-05	0.00231051	Zinc finger (C3HC4-type RING finger) family protein
Soltu.DM.04G024780.1	36.5315	-2.49095	0.330973	-7.52616	5.22539e-14	3.11367e-11	Protein of Unknown Function (DUF239)
Soltu.DM.01G028030.1	119.648	-2.44841	0.729924	-3.35434	0.00079556	0.015106	glutathione S-transferase TAU
Soltu.DM.11G005590.1	7.55326	-2.41854	0.751051	-3.22021	0.00128098	0.0214191	UDP-Glycosyltransferase superfamily protein
Soltu.DM.04G009350.1	39.3226	-2.37972	0.727367	-3.27169	0.00106905	0.0187159	Outward rectifying potassium channel protein
Soltu.DM.07G017130.1	27.5246	-2.37761	0.478089	-4.97315	6.58721e-07	5.35689e-05	Cell differentiation, Rcd1-like protein
Soltu.DM.05G010060.1	62.2566	-2.36843	0.570812	-4.14923	3.33591e-05	0.00131879	sulfur E2
Soltu.DM.04G027640.1	54.9001	-2.35284	0.769168	-3.05895	0.00222117	0.0319695	Peroxidase superfamily protein
Soltu.DM.10G002080.1	53.9439	-2.3514	0.446897	-5.26161	1.42797e-07	1.41386e-05	S-locus lectin protein kinase family protein
Soltu.DM.06G016650.1	52.1071	-2.3404	0.643497	-3.637	0.000275829	0.00672599	cytochrome P450, family 71, subfamily B, polypeptide
Soltu.DM.08G002270.1	35.4097	-2.33762	0.547514	-4.26952	1.95895e-05	0.000858296	Uridine diphosphate glycosyltransferase 74E2
Soltu.DM.11G005490.1	378.835	-2.33138	0.656182	-3.55295	0.000380935	0.00864569	UDP-glucosyl transferase 72B3
Soltu.DM.02G014520.1	271.517	-2.31336	0.58487	-3.95533	7.64282e-05	0.00246776	senescence-related gene
Soltu.DM.06G004050.1	291.806	-2.28859	0.325261	-7.03615	1.9762e-12	7.27708e-10	SCARECROW-like
Soltu.DM.07G003530.1	99.3111	-2.27596	0.618256	-3.68126	0.000232088	0.00589295	copper ion binding
Soltu.DM.12G027200.1	89.7186	-2.26742	0.396099	-5.72437	1.03816e-08	1.44168e-06	Protein of unknown function, DUF593
Soltu.DM.03G028530.1	11.9593	-2.25522	0.747717	-3.01614	0.00256012	0.0354619	tetraspanin8
Soltu.DM.03G024780.1	20.7499	-2.24123	0.616925	-3.6329	0.000280253	0.00679847	Xanthine/uracil permease family protein
Soltu.DM.02G026360.1	88.7202	-2.23959	0.755017	-2.96628	0.0030143	0.0397696	MATE efflux family protein
Soltu.DM.02G022960.1	126.405	-2.22514	0.739503	-3.00897	0.00262134	0.0360964	basic chitinase
Soltu.DM.12G018680.1	55.6835	-2.21478	0.267603	-8.27636	1.27003e-16	1.18922e-13	nucleotide binding
Soltu.DM.10G015590.1	23.5628	-2.20482	0.624426	-3.53096	0.000414057	0.00921242	F-box family protein
Soltu.DM.11G005920.1	371.795	-2.19534	0.6321	-3.47308	0.000514517	0.010907	UDP-Glycosyltransferase superfamily protein
Soltu.DM.04G034860.1	411.017	-2.1937	0.689803	-3.18018	0.00147183	0.0235593	S-adenosyl-L-methionine-dependent methyltransferases superfamily protein
Soltu.DM.04G006570.1	68.7268	-2.18758	0.672779	-3.25156	0.00114773	0.0197245	RING/U-box superfamily protein
Soltu.DM.10G002020.5	204.742	-2.17685	0.374529	-5.81223	6.16478e-09	9.22549e-07	Auxin-responsive GH3 family protein
Soltu.DM.08G002260.1	48.9109	-2.17382	0.606134	-3.58638	0.000335306	0.00783808	UDP-glycosyltransferase 74 F1
Soltu.DM.04G032460.1	97.4431	-2.16429	0.371473	-5.82623	5.66944e-09	8.64207e-07	hypothetical protein
Soltu.DM.04G002880.1	96.6945	-2.16239	0.604689	-3.57604	0.000348839	0.00807952	MLP-like protein
Soltu.DM.02G024350.1	58.7139	-2.15938	0.372901	-5.79077	7.0063e-09	1.02968e-06	Protein of unknown function (DUF726)
Soltu.DM.05G006550.1	347.39	-2.15223	0.47432	-4.5375	5.69242e-06	0.000307344	thioredoxin
Soltu.DM.05G022270.1	41.6435	-2.13882	0.560848	-3.81355	0.000136984	0.00394428	conserved hypothetical protein
Soltu.DM.01G030720.1	119.704	-2.131	0.743007	-2.86808	0.00412968	0.049685	hypothetical protein
Soltu.DM.02G019400.1	2409.53	-2.12863	0.481997	-4.41626	1.00423e-05	0.000498661	terpene synthase-like sequence-1,8-cineole
Soltu.DM.08G023840.1	3069.81	-2.12382	0.521293	-4.07414	4.61841e-05	0.00168928	expansin-like B1
Soltu.DM.05G016010.1	341.724	-2.12246	0.361607	-5.86953	4.37036e-09	6.88605e-07	eif4a-2
Soltu.DM.07G023880.1	22.4853	-2.11623	0.437665	-4.83528	1.32957e-06	9.37079e-05	hypothetical protein
Soltu.DM.06G017320.1	32.2821	-2.09864	0.556785	-3.7692	0.000163769	0.00452546	HSP40/DnaJ peptide-binding protein
Soltu.DM.11G007890.2	16.5881	-2.09744	0.572016	-3.66675	0.000245652	0.0061503	AT-hook motif nuclear-localized protein
Soltu.DM.11G002380.1	59.6155	-2.09535	0.530211	-3.95192	7.75262e-05	0.0024983	GAST1 protein homolog
Soltu.DM.01G023050.1	294.108	-2.08748	0.658525	-3.16993	0.00152475	0.0242575	Plant basic secretory protein (BSP) family protein
Soltu.DM.10G021400.1	3974.72	-2.08681	0.23735	-8.79215	1.46731e-18	2.00367e-15	UDP-Glycosyltransferase superfamily protein
Soltu.DM.04G026480.1	183.713	-2.08344	0.719817	-2.89441	0.00379874	0.0467327	hypothetical protein
Soltu.DM.01G027610.1	108.517	-2.0671	0.554973	-3.72468	0.00019556	0.00515614	ADP/ATP carrier
Soltu.DM.06G013260.1	8343.76	-2.06705	0.358325	-5.76865	7.9911e-09	1.14865e-06	Calcium-dependent lipid-binding (CaLB domain) family protein
Soltu.DM.06G026270.1	121.329	-2.06403	0.429964	-4.80048	1.58288e-06	0.000108074	catalytics
Soltu.DM.08G027260.1	117.655	-2.062	0.568004	-3.63025	0.000283148	0.00684843	osmotin
Soltu.DM.07G005300.1	17.3317	-2.05825	0.475714	-4.32665	1.51397e-05	0.00069982	F-box and associated interaction domains-containing protein
Soltu.DM.10G020020.1	181.909	-2.05823	0.491665	-4.18626	2.83593e-05	0.00116177	Arabidopsis Inositol phosphorylceramide synthase
Soltu.DM.02G003500.1	44.0088	-2.04705	0.49051	-4.17332	3.00197e-05	0.00121762	Leucine-rich receptor-like protein kinase family protein
Soltu.DM.01G035200.2	333.045	-2.04511	0.341344	-5.99134	2.08121e-09	3.46716e-07	auxin response factor
Soltu.DM.01G008800.1	17.8939	-2.04283	0.466912	-4.3752	1.21319e-05	0.000582991	potassium channel in Arabidopsis thaliana
Soltu.DM.06G024530.1	12.5262	-2.04188	0.599097	-3.40827	0.000653767	0.0131047	RING/U-box superfamily protein
Soltu.DM.06G012970.2	52.5559	-2.03888	0.609937	-3.34277	0.000829476	0.0156412	BCL-2-associated athanogene
Soltu.DM.02G014460.1	164.959	-2.03179	0.619463	-3.27992	0.00103837	0.0183732	senescence-related gene
Soltu.DM.07G017100.1	65.2505	-2.02574	0.543033	-3.73042	0.000191162	0.00508354	Cell differentiation, Rcd1-like protein
Soltu.DM.09G030770.2	1403.64	-2.02289	0.419561	-4.82144	1.42526e-06	9.95953e-05	NAD(P)-linked oxidoreductase superfamily protein
Soltu.DM.02G025300.1	46.3889	-2.02172	0.351327	-5.75454	8.68795e-09	1.22729e-06	sec7 domain-containing protein
Soltu.DM.09G018690.1	46.9648	-2.00693	0.62099	-3.23182	0.00123006	0.0208012	glutathione S-transferase tau
Soltu.DM.11G017370.1	13.3817	-2.00617	0.562848	-3.56431	0.000364815	0.00833756	conserved hypothetical protein
StCLE4	8617.27	-12.8282	0.504809	-25.4119	1.86096e-142	6.09893e-138	StCLE4
Soltu.DM.08G006330.1	155.115	-10.7869	1.10706	-9.74375	1.96176e-22	4.59234e-19	P-loop containing nucleoside triphosphate hydrolases superfamily protein
Soltu.DM.04G024410.1	35.1482	-1.99277	0.387012	-5.14912	2.61717e-07	2.3892e-05	Neprosin domain containing protein
Soltu.DM.12G022970.1	33.401	-1.99111	0.43734	-4.55276	5.29462e-06	0.000290579	myb domain protein
Soltu.DM.01G041090.1	43.6627	-1.98921	0.540485	-3.68041	0.000232857	0.00590666	AGAMOUS-like
Soltu.DM.11G005910.1	263.274	-1.98192	0.66598	-2.97595	0.00292084	0.0388651	UDP-glucose:flavonoid 3-o-glucosyltransferase
Soltu.DM.01G029080.1	238.583	-1.97952	0.513146	-3.85761	0.000114502	0.00342388	Thioredoxin superfamily protein
Soltu.DM.05G025340.1	35.4727	-1.96598	0.662475	-2.96763	0.00300101	0.0396741	Disease resistance-responsive (dirigent-like protein) family protein
Soltu.DM.10G021450.1	1219.34	-1.96053	0.366786	-5.34515	9.03419e-08	9.83646e-06	UDP-Glycosyltransferase superfamily protein
Soltu.DM.08G002230.1	35.7217	-1.95132	0.487212	-4.00508	6.19968e-05	0.00209466	UDP-glycosyltransferase 74 F1
Soltu.DM.10G019380.1	41.5937	-1.94777	0.523291	-3.72215	0.000197531	0.0051948	myb-like HTH transcriptional regulator family protein
Soltu.DM.06G022750.1	43.8432	-1.93909	0.607811	-3.19029	0.0014213	0.0229912	phosphate starvation-induced gene
Soltu.DM.04G034480.1	333.869	-1.92789	0.612505	-3.14754	0.0016465	0.025659	thylakoid processing peptide
Soltu.DM.04G015510.1	16.6656	-1.92175	0.581882	-3.30265	0.000957772	0.0173325	DORNROSCHEN-like
Soltu.DM.01G035590.1	252.192	-1.91177	0.581266	-3.28898	0.00100552	0.0179	NADPH:quinone oxidoreductase
Soltu.DM.10G021400.3	1490.3	-1.90827	0.48025	-3.9735	7.08234e-05	0.00232342	UDP-Glycosyltransferase superfamily protein
Soltu.DM.11G016150.1	84.291	-1.90443	0.58202	-3.2721	0.00106753	0.0187092	Protein of unknown function (DUF506)
Soltu.DM.11G005480.1	85.4517	-1.90379	0.627488	-3.03399	0.00241346	0.0340345	UDP-glucosyl transferase 72B3
Soltu.DM.01G001980.1	39.261	-1.90269	0.559762	-3.3991	0.000676068	0.0134283	hypothetical protein
Soltu.DM.01G018850.1	94.2776	-1.90003	0.596735	-3.18403	0.00145238	0.0233359	gibberellin 3-oxidase
Soltu.DM.02G034250.1	126.475	-1.89886	0.547425	-3.46871	0.000522966	0.0110575	Peroxidase superfamily protein
Soltu.DM.07G019630.1	36.0487	-1.88826	0.550854	-3.42787	0.000608334	0.0124344	Integrase-type DNA-binding superfamily protein
Soltu.DM.11G001970.1	952.728	-1.87824	0.526697	-3.56607	0.00036237	0.00831068	elicitor-activated gene 3-2
Soltu.DM.11G026330.1	35.7155	-1.87605	0.518749	-3.61648	0.000298634	0.00714389	conserved hypothetical protein
Soltu.DM.07G003720.1	695.979	-1.87428	0.343616	-5.45457	4.90911e-08	5.74594e-06	conserved hypothetical protein
Soltu.DM.11G004510.2	25.1143	-1.85984	0.631074	-2.9471	0.00320774	0.0414703	RNA-binding (RRM/RBD/RNP motifs) family protein with retrovirus zinc finger-like domain
Soltu.DM.01G026450.1	201.642	-1.85042	0.394934	-4.6854	2.79418e-06	0.00017141	aldehyde oxidase
Soltu.DM.11G005720.1	39.1736	-1.84143	0.512471	-3.59325	0.000326581	0.00767019	UDP-glucosyl transferase 72B3
Soltu.DM.08G019550.1	78.0488	-1.82357	0.327144	-5.57421	2.48654e-08	3.09853e-06	F-box/RNI-like superfamily protein
Soltu.DM.01G033140.1	75.0841	-1.81195	0.24164	-7.49853	6.45376e-14	3.71069e-11	NAD(P)-binding Rossmann-fold superfamily protein
Soltu.DM.03G036040.1	198.155	-1.81086	0.372451	-4.862	1.16206e-06	8.37014e-05	Mannose-binding lectin superfamily protein
Soltu.DM.05G020950.1	26.2985	-1.8103	0.549162	-3.29647	0.00097907	0.0175723	glutamine synthase clone R1
Soltu.DM.11G003810.1	433.861	-1.80844	0.596603	-3.03122	0.00243568	0.0342889	Six-hairpin glycosidases superfamily protein
Soltu.DM.08G025310.1	133.72	-1.80799	0.288669	-6.26318	3.77208e-10	7.63101e-08	Plant protein of unknown function (DUF863)
Soltu.DM.03G023960.1	26.6477	-1.80758	0.49572	-3.64637	0.000265971	0.00653912	leucine-rich repeat transmembrane protein kinase family protein
Soltu.DM.02G014490.1	273.548	-1.80678	0.563454	-3.20662	0.00134303	0.0221516	senescence-related gene
Soltu.DM.05G001590.1	47.8603	-1.8045	0.464724	-3.88295	0.000103198	0.00314614	Armadillo/beta-catenin-like repeat family protein
Soltu.DM.12G010540.1	34.3091	-1.79922	0.546365	-3.29308	0.000990969	0.0177294	Regulator of Vps4 activity in the MVB pathway protein
Soltu.DM.07G024520.2	67.7178	-1.79571	0.511225	-3.51256	0.000443807	0.00970359	Transducin/WD40 repeat-like superfamily protein
Soltu.DM.07G023670.1	53.3079	-1.79287	0.569559	-3.14782	0.00164494	0.0256469	phosphoenolpyruvate carboxylase
Soltu.DM.11G019960.1	92.4	-1.7878	0.388526	-4.6015	4.19456e-06	0.000237834	multidrug resistance-associated protein
Soltu.DM.04G021440.2	68.7545	-1.78002	0.556342	-3.19951	0.0013766	0.0225161	Major facilitator superfamily protein
Soltu.DM.12G009490.1	58.1244	-1.77917	0.613491	-2.90008	0.00373068	0.0461902	Cytochrome P450 superfamily protein
Soltu.DM.06G027860.1	22.4127	-1.77741	0.565233	-3.14456	0.00166339	0.0258695	phosphate transporter 3
Soltu.DM.04G010830.1	69.496	-1.77028	0.304695	-5.81001	6.24683e-09	9.26368e-07	serine carboxypeptidase-like
Soltu.DM.09G022310.2	460.044	-1.7695	0.166995	-10.5961	3.10613e-26	8.50805e-23	Small nuclear ribonucleoprotein family protein
Soltu.DM.02G034160.1	63.6377	-1.7673	0.533238	-3.31428	0.000918804	0.0168317	cytochrome P450, family 94, subfamily B, polypeptide
Soltu.DM.03G027410.1	33.4419	-1.76608	0.363567	-4.85764	1.18793e-06	8.51902e-05	conserved hypothetical protein
Soltu.DM.08G002280.1	1649.61	-1.75927	0.462621	-3.80283	0.000143051	0.00409093	Uridine diphosphate glycosyltransferase 74E2
Soltu.DM.09G001310.1	97.0077	-1.75518	0.587022	-2.98997	0.00279008	0.0377225	glutathione S-transferase TAU
Soltu.DM.11G002820.1	18.3408	-1.73201	0.572102	-3.02745	0.00246624	0.0346002	UDP-Glycosyltransferase superfamily protein
Soltu.DM.07G020220.1	89.6272	-1.72746	0.546578	-3.1605	0.00157497	0.0247876	conserved hypothetical protein
Soltu.DM.05G026280.1	13.24	-1.72401	0.541461	-3.18399	0.00145258	0.0233359	Flavin containing amine oxidoreductase family protein
Soltu.DM.01G036420.1	4030.78	-1.71187	0.454248	-3.76858	0.00016418	0.00452917	pathogenesis-related
Soltu.DM.11G002040.1	254.89	-1.70982	0.579027	-2.95292	0.00314782	0.0409542	elicitor-activated gene 3-2
Soltu.DM.01G049680.1	650.801	-1.69675	0.443204	-3.82838	0.000128991	0.0037644	SEC14-like
Soltu.DM.01G037360.1	161.7	-1.69113	0.436007	-3.87867	0.000105029	0.00319305	Acyl-CoA N-acyltransferases (NAT) superfamily protein
Soltu.DM.09G029940.1	62.4518	-1.68993	0.576601	-2.93085	0.00338039	0.0430402	UDP-glucosyl transferase 75B2
Soltu.DM.07G010420.3	719.885	-1.68873	0.449718	-3.75509	0.000173278	0.00469715	protein kinase family protein
Soltu.DM.01G004540.1	770.825	-1.68361	0.448204	-3.75635	0.00017241	0.00468136	MATE efflux family protein
Soltu.DM.02G010910.2	202.373	-1.67833	0.358727	-4.67858	2.88866e-06	0.000175967	non-intrinsic ABC protein
Soltu.DM.02G013660.1	45.3846	-1.6619	0.396028	-4.19642	2.71172e-05	0.0011207	F-box and associated interaction domains-containing protein
Soltu.DM.11G002020.1	3221.35	-1.65721	0.552936	-2.99711	0.0027255	0.0372362	elicitor-activated gene 3-2
Soltu.DM.01G034450.7	73.7258	-1.6544	0.499703	-3.31077	0.000930387	0.0169775	transcription regulators
Soltu.DM.06G020950.1	18.2087	-1.65291	0.524579	-3.15092	0.00162758	0.0254004	NB-ARC domain-containing disease resistance protein
Soltu.DM.07G019960.2	141.102	-1.64411	0.446552	-3.68178	0.000231607	0.00588864	O-acyltransferase (WSD1-like) family protein
Soltu.DM.02G028710.1	80.7459	-1.64372	0.485495	-3.38566	0.000710068	0.0139181	conserved hypothetical protein
Soltu.DM.04G034390.1	173.308	-1.64022	0.343616	-4.77341	1.81131e-06	0.000120166	Serine protease inhibitor (SERPIN) family protein
Soltu.DM.02G027020.1	398.56	-1.64015	0.311382	-5.2673	1.38443e-07	1.37491e-05	UDP-Glycosyltransferase superfamily protein
Soltu.DM.06G026190.1	967.076	-1.63661	0.263269	-6.2165	5.08354e-10	9.74286e-08	NAD(P)-binding Rossmann-fold superfamily protein
Soltu.DM.06G029230.1	179.281	-1.6364	0.364236	-4.4927	7.03258e-06	0.00036995	calmodulin-like
Soltu.DM.11G012500.1	143.817	-1.6345	0.461783	-3.53953	0.000400845	0.00899786	Potato type II proteinase inhibitor family domain containing protein
Soltu.DM.06G001460.1	132.122	-1.63219	0.3801	-4.29411	1.75399e-05	0.000789608	Protein kinase family protein with leucine-rich repeat domain
Soltu.DM.06G032990.1	40.563	-1.62072	0.442318	-3.66415	0.000248164	0.00619242	cytochrome P450, family 714, subfamily A, polypeptide
Soltu.DM.02G022360.1	126.651	-1.61487	0.396316	-4.07469	4.60749e-05	0.00168717	Transcription factor jumonji (jmjC) domain-containing protein
Soltu.DM.01G002140.1	7271.22	-1.61282	0.441421	-3.6537	0.000258485	0.00638863	lipoxygenase
Soltu.DM.01G026670.1	55.3226	-1.60772	0.522731	-3.07561	0.00210071	0.0306656	serine carboxypeptidase-like
Soltu.DM.09G027180.1	1193.31	-1.6018	0.284762	-5.62505	1.85453e-08	2.42145e-06	Cyclopropane-fatty-acyl-phospholipid synthase
Soltu.DM.09G007000.1	659.707	-1.60123	0.186984	-8.56345	1.09536e-17	1.3807e-14	P-loop containing nucleoside triphosphate hydrolases superfamily protein
Soltu.DM.09G001890.1	216.739	-1.59838	0.307438	-5.19903	2.00335e-07	1.90307e-05	receptor lectin kinase
Soltu.DM.02G019810.1	35.3768	-1.59825	0.463022	-3.45179	0.000556879	0.0116098	NTF2-like
Soltu.DM.09G026680.1	605.517	-1.5948	0.318949	-5.00016	5.72817e-07	4.78901e-05	phosphate transporter 1
Soltu.DM.09G023430.1	467.588	-1.59225	0.379899	-4.19123	2.77446e-05	0.00114087	beta glucosidase
Soltu.DM.01G009930.3	111.447	-1.58863	0.537574	-2.95518	0.00312485	0.040794	RING/FYVE/PHD zinc finger superfamily protein
Soltu.DM.05G021430.1	193.679	-1.58615	0.300163	-5.28428	1.26199e-07	1.27259e-05	RAB GTPase homolog H1E
Soltu.DM.09G030770.1	3081.94	-1.57728	0.396113	-3.9819	6.83652e-05	0.00226316	NAD(P)-linked oxidoreductase superfamily protein
Soltu.DM.01G045970.1	2083.75	-1.56248	0.471125	-3.31649	0.000911564	0.0167365	CAP (Cysteine-rich secretory proteins, Antigen 5, and Pathogenesis-related 1 protein) superfamily protein
Soltu.DM.10G023540.2	43.125	-1.55538	0.485286	-3.20509	0.00135022	0.0222366	Tetratricopeptide repeat (TPR)-like superfamily protein
Soltu.DM.05G006540.1	175.662	-1.55509	0.369799	-4.20523	2.60816e-05	0.00109027	thioredoxin
Soltu.DM.06G018680.1	1748.45	-1.5514	0.500717	-3.09836	0.00194595	0.0290017	NAD(P)-binding Rossmann-fold superfamily protein
Soltu.DM.02G012040.1	504.274	-1.54633	0.468036	-3.30387	0.00095359	0.0172758	Cysteine proteinases superfamily protein
Soltu.DM.10G023750.1	5729.79	-1.54633	0.397818	-3.88704	0.000101476	0.00310457	Glutathione S-transferase family protein
Soltu.DM.03G016890.3	151.53	-1.5409	0.469118	-3.28468	0.00102099	0.0181066	RING/U-box superfamily protein
Soltu.DM.09G020960.1	512.979	-1.54024	0.434019	-3.54879	0.000387	0.00874097	cytochrome P450, family 94, subfamily B, polypeptide
Soltu.DM.08G023210.1	2618.21	-1.53787	0.344535	-4.46362	8.0588e-06	0.000414617	expansin-like B1
Soltu.DM.02G022910.1	1047.08	-1.53711	0.515058	-2.98434	0.00284194	0.0381843	AMP-dependent synthetase and ligase family protein
Soltu.DM.02G004080.1	691.484	-1.53391	0.479066	-3.20188	0.00136532	0.0223953	conserved hypothetical protein
Soltu.DM.11G025890.1	427.692	-1.53326	0.450746	-3.40161	0.000669904	0.0133545	related to AP2.7
Soltu.DM.09G022700.1	80.6113	-1.53317	0.395956	-3.87206	0.000107919	0.00326578	hypothetical protein
Soltu.DM.04G027060.2	2394.04	-1.53049	0.360561	-4.24474	2.18851e-05	0.000940028	Inositol monophosphatase family protein
Soltu.DM.03G025500.1	102.375	-1.52831	0.296488	-5.15472	2.54013e-07	2.33187e-05	cytochrome P450, family 71, subfamily A, polypeptide
Soltu.DM.09G030910.1	680.704	-1.52458	0.310249	-4.91404	8.92202e-07	6.81588e-05	cytochrome P450, family 76, subfamily C, polypeptide
Soltu.DM.03G034960.1	58.3234	-1.52225	0.400829	-3.79774	0.000146019	0.00415046	Galactose oxidase/kelch repeat superfamily protein
Soltu.DM.01G000320.1	197.529	-1.51981	0.347036	-4.37939	1.19011e-05	0.000575934	S-adenosyl-L-methionine-dependent methyltransferases superfamily protein
Soltu.DM.01G047740.2	1123.19	-1.51534	0.259306	-5.84383	5.10154e-09	7.88644e-07	cytochrome P450, family 707, subfamily A, polypeptide
Soltu.DM.01G005480.1	27.8837	-1.51452	0.486324	-3.11423	0.00184428	0.0278794	golgi nucleotide sugar transporter
Soltu.DM.02G033780.6	1185.1	-1.51414	0.483355	-3.13256	0.00173292	0.0267135	TPX2 (targeting protein for Xklp2) protein family
Soltu.DM.03G024530.1	35.3014	-1.51045	0.494034	-3.05738	0.00223278	0.0320825	malate synthase
Soltu.DM.08G002240.1	63.5174	-1.50917	0.3684	-4.09656	4.19341e-05	0.00156884	hypothetical protein
Soltu.DM.11G007750.1	126.947	-1.50771	0.419104	-3.59746	0.000321337	0.00756007	SSXT family protein
Soltu.DM.02G023390.1	371.525	-1.50442	0.15871	-9.47902	2.56678e-21	4.99432e-18	Eukaryotic aspartyl protease family protein
Soltu.DM.03G016770.2	181.875	-1.50434	0.35461	-4.24224	2.21296e-05	0.000948045	TraB family protein
Soltu.DM.11G005510.1	47.5634	-1.50032	0.368317	-4.07345	4.63225e-05	0.00168968	UDP-Glycosyltransferase superfamily protein
Soltu.DM.09G017910.1	70.7182	-1.49612	0.505088	-2.96209	0.00305556	0.0401523	conserved hypothetical protein
Soltu.DM.02G030390.1	21.396	-1.48987	0.49876	-2.98714	0.002816	0.0379165	zinc-binding in reverse transcriptase domain containing protein
Soltu.DM.10G022460.1	187.742	-1.4872	0.501887	-2.96322	0.00304439	0.0400538	Tautomerase/MIF superfamily protein
Soltu.DM.03G001940.1	144.2	-1.48311	0.243834	-6.08246	1.18355e-09	2.13123e-07	receptor like protein
Soltu.DM.01G045930.1	3614.32	-1.48205	0.489418	-3.0282	0.00246018	0.0345299	CAP (Cysteine-rich secretory proteins, Antigen 5, and Pathogenesis-related 1 protein) superfamily protein
Soltu.DM.11G005560.1	103.51	-1.47402	0.417596	-3.52978	0.000415901	0.0092409	UDP-Glycosyltransferase superfamily protein
Soltu.DM.02G028120.1	1798.71	-1.4636	0.503939	-2.90433	0.00368043	0.0457178	cytochrome P450, family 81, subfamily D, polypeptide
Soltu.DM.03G014290.1	13.6993	-1.45882	0.491746	-2.96662	0.00301095	0.0397413	SU(VAR)3-9 homolog
Soltu.DM.06G034980.1	268.998	-1.45856	0.412723	-3.534	0.000409323	0.00914433	dehydroquinate dehydratase, putative / shikimate dehydrogenase, putative
Soltu.DM.11G022880.2	123.052	-1.45725	0.362887	-4.01571	5.92664e-05	0.00203224	Protein kinase superfamily protein
Soltu.DM.05G023580.1	39.1953	-1.45718	0.381746	-3.81715	0.000135004	0.00389823	polymerase delta
Soltu.DM.01G017420.1	2347.02	-1.45474	0.469242	-3.1002	0.00193389	0.028914	Adenine nucleotide alpha hydrolases-like superfamily protein
Soltu.DM.11G006400.1	143.958	-1.45448	0.4019	-3.619	0.000295739	0.00709536	TRICHOME BIREFRINGENCE-LIKE
Soltu.DM.06G030710.1	168.097	-1.45198	0.445033	-3.26264	0.0011038	0.0192114	LOB domain-containing protein
Soltu.DM.07G005330.2	67.2275	-1.4463	0.44434	-3.25493	0.00113419	0.0195533	purple acid phosphatase
Soltu.DM.08G001630.1	177.247	-1.44423	0.291654	-4.95186	7.35063e-07	5.83298e-05	Acyl transferase/acyl hydrolase/lysophospholipase superfamily protein
Soltu.DM.07G019960.1	579.211	-1.44369	0.391479	-3.68779	0.000226213	0.00578742	O-acyltransferase (WSD1-like) family protein
Soltu.DM.10G028190.1	123.254	-1.44169	0.476869	-3.02325	0.00250073	0.0348158	IQ-domain
Soltu.DM.09G023990.1	2397.52	-1.43793	0.124941	-11.5089	1.19003e-30	6.50013e-27	alpha/beta-Hydrolases superfamily protein
Soltu.DM.05G003330.1	327.136	-1.4318	0.373393	-3.83456	0.000125791	0.00368414	C2H2 and C2HC zinc fingers superfamily protein
Soltu.DM.09G005740.1	139.977	-1.42816	0.360734	-3.95904	7.52517e-05	0.00243939	Calcium-dependent lipid-binding (CaLB domain) family protein
Soltu.DM.03G011350.1	384.996	-1.42773	0.265614	-5.37522	7.64899e-08	8.46893e-06	haemoglobin
Soltu.DM.11G012160.1	31.2397	-1.42574	0.423975	-3.36278	0.000771617	0.0147711	EF-TU receptor
Soltu.DM.12G011130.1	60.7043	-1.419	0.303842	-4.6702	3.00908e-06	0.000182286	heat shock protein 70B
Soltu.DM.01G037160.2	505.082	-1.41448	0.339621	-4.16487	3.11524e-05	0.00125019	O-acetylserine (thiol) lyase (OAS-TL) isoform A1
Soltu.DM.04G026490.1	13777.9	-1.41353	0.336227	-4.20411	2.62113e-05	0.00109223	hypothetical protein
Soltu.DM.11G005900.1	45.3883	-1.41275	0.477468	-2.95884	0.003088	0.0404975	UDP-Glycosyltransferase superfamily protein
Soltu.DM.02G021680.1	18.8931	-1.41119	0.464961	-3.03507	0.00240481	0.0339418	pleiotropic drug resistance
Soltu.DM.08G029040.1	82.1409	-1.41098	0.37023	-3.8111	0.00013835	0.00397731	RING/U-box superfamily protein
Soltu.DM.05G010890.1	70.6489	-1.39933	0.358062	-3.90807	9.30366e-05	0.00291221	DNA-binding storekeeper protein-related
Soltu.DM.08G002210.1	43.27	-1.39927	0.453859	-3.08306	0.00204886	0.0301348	Uridine diphosphate glycosyltransferase 74E2
Soltu.DM.07G006120.1	1848.25	-1.3963	0.244464	-5.71168	1.11868e-08	1.54695e-06	Organ specific protein domain containing protein
Soltu.DM.11G025670.1	197.715	-1.39427	0.284818	-4.89532	9.81481e-07	7.34385e-05	NB-ARC domain-containing disease resistance protein
Soltu.DM.10G021450.2	85.3295	-1.39307	0.280998	-4.95757	7.13805e-07	5.69185e-05	UDP-Glycosyltransferase superfamily protein
Soltu.DM.06G006130.1	12793.3	-1.39042	0.268005	-5.18806	2.125e-07	1.98412e-05	plasma membrane intrinsic protein
Soltu.DM.04G009270.1	47.4585	-1.38062	0.454207	-3.03964	0.00236865	0.0335325	Cystatin/monellin superfamily protein
Soltu.DM.10G024390.1	81.8179	-1.37638	0.440465	-3.12484	0.00177903	0.0272039	Heavy metal transport/detoxification superfamily protein
Soltu.DM.01G024920.1	27.7714	-1.37225	0.401922	-3.41422	0.000639652	0.0129323	Calcium-dependent phosphotriesterase superfamily protein
Soltu.DM.11G005930.1	57.579	-1.3697	0.303386	-4.51472	6.34016e-06	0.000338414	UDP-Glycosyltransferase superfamily protein
Soltu.DM.11G005710.1	125.263	-1.36969	0.239874	-5.71004	1.12951e-08	1.55535e-06	UDP-Glycosyltransferase superfamily protein
Soltu.DM.03G035560.1	43.9688	-1.36901	0.393896	-3.47556	0.000509792	0.0108349	conserved hypothetical protein
Soltu.DM.09G023410.1	118.536	-1.36861	0.392853	-3.48376	0.000494418	0.0105451	beta glucosidase
Soltu.DM.01G037290.1	19.0562	-1.36205	0.412245	-3.30398	0.000953222	0.0172758	DUTP-PYROPHOSPHATASE-LIKE
Soltu.DM.01G003570.1	49.6843	-1.36166	0.427847	-3.18258	0.00145968	0.0234156	TRICHOME BIREFRINGENCE-LIKE
Soltu.DM.05G002380.1	81.2478	-1.36163	0.415235	-3.27918	0.00104107	0.0183732	Protein of unknown function, DUF617
Soltu.DM.07G003360.1	44.1578	-1.35899	0.41713	-3.25796	0.00112216	0.0194482	Raffinose synthase family protein
Soltu.DM.02G007360.1	85.1502	-1.35508	0.447976	-3.0249	0.00248719	0.0347293	Cysteine-rich TM module stress tolerance domain containing protein
Soltu.DM.08G013400.1	28157.9	-1.35196	0.372567	-3.62877	0.000284773	0.00687756	glycine decarboxylase P-protein
Soltu.DM.10G004180.1	917.313	-1.34757	0.399877	-3.36997	0.000751771	0.0144928	Polyketide cyclase/dehydrase and lipid transport superfamily protein
Soltu.DM.08G015360.1	1096.47	-1.34205	0.364174	-3.68519	0.000228531	0.00583306	tonoplast intrinsic protein 4
Soltu.DM.01G001840.1	9319.36	-1.33846	0.215234	-6.2186	5.01598e-10	9.66992e-08	peroxidase
Soltu.DM.01G022650.1	6614.53	-1.3383	0.414632	-3.22768	0.00124798	0.020985	copper/zinc superoxide dismutase
Soltu.DM.04G037250.1	2790.67	-1.32922	0.427511	-3.1092	0.00187594	0.0282407	alpha-amylase-like
Soltu.DM.09G030840.1	153.864	-1.32808	0.301451	-4.40564	1.05474e-05	0.000519024	NAD(P)-linked oxidoreductase superfamily protein
Soltu.DM.10G011300.1	46.4241	-1.32552	0.348921	-3.7989	0.00014534	0.00413835	Calcium-binding EF-hand family protein
Soltu.DM.02G004190.1	353.7	-1.32534	0.414978	-3.19377	0.00140429	0.0227949	aspartic proteinase A1
Soltu.DM.07G022490.1	351.62	-1.3243	0.282017	-4.69579	2.65575e-06	0.000164221	glutathione S-transferase TAU
Soltu.DM.03G020070.1	2323.94	-1.32426	0.239849	-5.52121	3.36682e-08	4.02703e-06	Nodulin MtN3 family protein
Soltu.DM.03G005400.1	394.378	-1.32224	0.324853	-4.07029	4.69554e-05	0.00170796	N-acetyl-l-glutamate synthase
Soltu.DM.07G014290.1	525.959	-1.32136	0.305902	-4.31955	1.56345e-05	0.000716629	NAD(P)-linked oxidoreductase superfamily protein
Soltu.DM.03G005640.1	102.183	-1.3188	0.364874	-3.61439	0.000301057	0.00718613	GroES-like zinc-binding dehydrogenase family protein
Soltu.DM.06G009320.1	504.867	-1.31628	0.384906	-3.41974	0.000626816	0.012712	FER-like regulator of iron uptake
Soltu.DM.12G026350.1	643.469	-1.31621	0.242483	-5.42807	5.69662e-08	6.55072e-06	Plant invertase/pectin methylesterase inhibitor superfamily protein
Soltu.DM.02G003450.1	2864.47	-1.31314	0.210296	-6.24424	4.25864e-10	8.40773e-08	phloem protein 2-A10
Soltu.DM.07G000200.1	650.87	-1.3102	0.366441	-3.57549	0.000349577	0.00809089	Glycosyl hydrolase family protein with chitinase insertion domain
Soltu.DM.04G026000.1	2351.09	-1.30922	0.340598	-3.8439	0.000121095	0.00359154	pathogenesis-related family protein
Soltu.DM.07G018100.2	892.962	-1.29876	0.363799	-3.57	0.00035698	0.00821003	beta-amylase
Soltu.DM.06G014550.1	450.506	-1.29798	0.312633	-4.15177	3.29913e-05	0.00130899	NAD(P)-linked oxidoreductase superfamily protein
Soltu.DM.05G018970.1	167.564	-1.29794	0.403442	-3.21716	0.00129466	0.0215818	xyloglucan endotransglycosylase
Soltu.DM.09G026280.1	129.924	-1.29569	0.279976	-4.62786	3.69459e-06	0.000215067	2-oxoglutarate (2OG) and Fe(II)-dependent oxygenase superfamily protein
Soltu.DM.11G025600.1	381.03	-1.29206	0.420209	-3.07481	0.0021064	0.0306813	LOB domain-containing protein
Soltu.DM.12G006980.1	755.134	-1.29059	0.269751	-4.78439	1.7151e-06	0.000115008	UDP-glucosyl transferase 85A2
Soltu.DM.12G011380.1	2047.5	-1.28749	0.175649	-7.32987	2.30374e-13	1.04862e-10	Stress up-regulated Nod 19 domain containing protein
Soltu.DM.01G021990.1	378.311	-1.28589	0.441025	-2.91568	0.00354915	0.0444974	F-box and associated interaction domains-containing protein
Soltu.DM.12G028900.1	121.396	-1.2751	0.378664	-3.36736	0.000758921	0.0146049	WRKY DNA-binding protein
Soltu.DM.02G019090.1	137.352	-1.27369	0.428586	-2.97184	0.00296019	0.0393089	protein serine/threonine kinases					carbohydrate binding	recognition of pollen
Soltu.DM.02G032350.2	656.481	-1.26544	0.41012	-3.08554	0.00203184	0.0299548	SIN3-like
Soltu.DM.02G001370.1	583.97	-1.26204	0.196295	-6.42928	1.28207e-10	2.89775e-08	cofactor assembly, complex C (B6F)
Soltu.DM.12G007130.1	485.056	-1.2604	0.281706	-4.47417	7.671e-06	0.000395658	Cellulase (glycosyl hydrolase family 5) domain containing protein
Soltu.DM.03G003780.1	783	-1.25858	0.269604	-4.66826	3.03759e-06	0.000183335	Serine carboxypeptidase S28 family protein
Soltu.DM.07G026310.1	60.0863	-1.2571	0.304616	-4.12683	3.67805e-05	0.00141813	aconitase
Soltu.DM.02G033080.1	170.275	-1.25504	0.331142	-3.79004	0.000150621	0.00425544	peptide deformylase 1B
Soltu.DM.04G024840.1	2463.2	-1.24688	0.319278	-3.9053	9.41097e-05	0.00293739	metallothionein 2B
Soltu.DM.09G010450.1	794.897	-1.23641	0.213967	-5.77853	7.53575e-09	1.08797e-06	with no lysine (K) kinase
Soltu.DM.01G047140.1	114.052	-1.23515	0.302889	-4.0779	4.54451e-05	0.00166783	UDP-glucosyl transferase 73B3
Soltu.DM.08G002290.1	2091.74	-1.22902	0.278155	-4.41846	9.94072e-06	0.000495043	WRKY DNA-binding protein
Soltu.DM.01G044590.1	5098.8	-1.22804	0.349644	-3.51226	0.000444307	0.00970359	Aldolase-type TIM barrel family protein
Soltu.DM.08G000720.1	285.691	-1.22752	0.256008	-4.79486	1.62787e-06	0.000110327	NB-ARC domain-containing disease resistance protein
Soltu.DM.08G021790.2	257.446	-1.22636	0.317976	-3.85676	0.000114898	0.0034326	lectin protein kinase family protein
Soltu.DM.05G008100.1	577.444	-1.22263	0.367174	-3.32983	0.000868996	0.0162	aldehyde dehydrogenase 2B7
Soltu.DM.09G027040.1	4196.72	-1.22214	0.308376	-3.96315	7.39676e-05	0.00240252	cyanase
Soltu.DM.02G002560.1	75.1875	-1.22191	0.274154	-4.457	8.31132e-06	0.000426271	Leucine-rich repeat protein kinase family protein
Soltu.DM.05G026120.2	200.243	-1.21843	0.345363	-3.52795	0.000418784	0.00928607	Protein of unknown function (DUF1997)
Soltu.DM.08G012240.1	423.34	-1.21651	0.284595	-4.27451	1.91554e-05	0.000844926	cytokinin oxidase
Soltu.DM.11G002350.1	1369.62	-1.21159	0.333464	-3.63335	0.000279765	0.0067961	geranylgeranyl pyrophosphate synthase
Soltu.DM.04G036750.1	4099.89	-1.21082	0.221247	-5.4727	4.43224e-08	5.2251e-06	StCLV1
Soltu.DM.06G010440.1	317.63	-1.20538	0.351375	-3.43045	0.000602574	0.0123349	Heavy metal transport/detoxification superfamily protein
Soltu.DM.04G010850.1	166.4	-1.20241	0.356221	-3.37546	0.00073692	0.0142653	serine carboxypeptidase-like
Soltu.DM.10G003520.1	1462.9	-1.20165	0.355824	-3.37708	0.000732589	0.0142082	Protein TAP1
Soltu.DM.07G022510.1	64.6925	-1.20141	0.237399	-5.0607	4.17718e-07	3.58953e-05	glutathione S-transferase TAU
Soltu.DM.09G021460.1	545.084	-1.20005	0.195992	-6.12293	9.18673e-10	1.72044e-07	RmlC-like cupins superfamily protein
Soltu.DM.01G009310.1	43.2317	-1.19758	0.341103	-3.51092	0.000446561	0.00973728	serine carboxypeptidase-like
Soltu.DM.07G021530.1	254.029	-1.19657	0.281293	-4.25382	2.10157e-05	0.00090984	S-domain-2
Soltu.DM.09G030780.1	686.466	-1.19551	0.28835	-4.14604	3.38269e-05	0.00132927	NAD(P)-linked oxidoreductase superfamily protein
Soltu.DM.06G024830.1	292.971	-1.19175	0.303226	-3.93025	8.48583e-05	0.00269222	nudix hydrolase homolog
Soltu.DM.09G005690.1	15266.9	-1.19106	0.331003	-3.59834	0.00032026	0.00754556	PHE ammonia lyase
Soltu.DM.03G019620.1	456.403	-1.18704	0.309274	-3.83815	0.000123964	0.00363711	phosphate transporter 3
Soltu.DM.10G020060.1	178.639	-1.18562	0.408566	-2.90191	0.00370893	0.0460253	RHO guanyl-nucleotide exchange factor
Soltu.DM.08G022010.1	59.9742	-1.1855	0.391642	-3.027	0.00246996	0.0346375	cytochrome P450, family 71, subfamily B, polypeptide
Soltu.DM.07G003350.1	30.1989	-1.18415	0.409502	-2.89168	0.00383183	0.0470339	hypothetical protein
Soltu.DM.05G026200.1	316.428	-1.1828	0.28002	-4.224	2.40008e-05	0.00101757	Pectin lyase-like superfamily protein
Soltu.DM.11G005820.1	91.7337	-1.18277	0.342757	-3.45076	0.000559011	0.0116468	UDP-Glycosyltransferase superfamily protein
Soltu.DM.07G000170.2	346.856	-1.17883	0.335964	-3.50879	0.000450152	0.00978305	Glycosyl hydrolase family protein with chitinase insertion domain
Soltu.DM.03G029850.1	1567.08	-1.17493	0.264939	-4.43473	9.21865e-06	0.000466239	zinc finger (C3HC4-type RING finger) family protein
Soltu.DM.03G025480.1	723.032	-1.17108	0.305038	-3.83913	0.00012347	0.00362914	cytochrome P450, family 71, subfamily A, polypeptide
Soltu.DM.01G019070.1	90.1882	-1.16922	0.385221	-3.03519	0.00240387	0.0339418	BED zinc finger
Soltu.DM.09G024000.1	610.91	-1.16547	0.140398	-8.30118	1.0308e-16	9.93598e-14	carboxyesterase
Soltu.DM.10G003530.1	2652.67	-1.16388	0.34166	-3.40654	0.000657924	0.0131717	Protein TAP1
Soltu.DM.10G024690.1	2585.3	-1.16326	0.257755	-4.51306	6.38984e-06	0.000340511	cytochrome P450, family 76, subfamily G, polypeptide
Soltu.DM.07G022450.1	484.881	-1.16302	0.251232	-4.62928	3.6694e-06	0.000214362	glutathione S-transferase TAU
Soltu.DM.04G012230.1	56.8096	-1.16229	0.374996	-3.09947	0.0019387	0.0289718	12-oxophytodienoate reductase
Soltu.DM.09G030800.1	1148.18	-1.15856	0.32613	-3.55247	0.000381638	0.00865565	NAD(P)-linked oxidoreductase superfamily protein
Soltu.DM.12G011420.1	1268.78	-1.15546	0.156597	-7.37853	1.60051e-13	7.82886e-11	Stress up-regulated Nod 19 domain containing protein
Soltu.DM.02G008130.1	130.501	-1.15252	0.287521	-4.00846	6.11149e-05	0.00207556	Calcium-binding EF-hand family protein
Soltu.DM.02G023710.4	31.9669	-1.15251	0.373297	-3.08738	0.00201932	0.0298374	oligopeptide transporter
Soltu.DM.03G036390.1	249.043	-1.14935	0.263186	-4.36708	1.25921e-05	0.000599826	Protein kinase superfamily protein
Soltu.DM.05G015800.1	101.174	-1.14831	0.303349	-3.78544	0.00015344	0.00432017	hypothetical protein
Soltu.DM.09G002210.1	154.613	-1.1472	0.25094	-4.57161	4.83988e-06	0.0002693	poltergeist like
Soltu.DM.05G009870.4	3397.39	-1.14348	0.18331	-6.23792	4.43433e-10	8.70218e-08	Octicosapeptide/Phox/Bem1p family protein
Soltu.DM.04G011150.1	5371.65	-1.14298	0.15462	-7.39221	1.44407e-13	7.28098e-11	BRASSINOSTEROID KINASE
Soltu.DM.06G030840.1	22.5006	-1.13892	0.383192	-2.9722	0.00295677	0.0392793	nitrate excretion transporter1
Soltu.DM.12G005400.1	311.555	-1.13751	0.275179	-4.13369	3.56984e-05	0.00138619	Sec14p-like phosphatidylinositol transfer family protein
Soltu.DM.11G025890.2	831.467	-1.13679	0.336419	-3.3791	0.000727229	0.0141277	related to AP2.7
Soltu.DM.04G031560.1	351.697	-1.13617	0.361682	-3.14134	0.00168178	0.0260724	Zinc finger (C3HC4-type RING finger) family protein
Soltu.DM.10G017720.1	845.993	-1.13261	0.164319	-6.89276	5.47212e-12	1.84884e-09	sterol methyltransferase
Soltu.DM.08G028280.2	828.34	-1.13252	0.303255	-3.73454	0.000188062	0.00501901	monodehydroascorbate reductase
Soltu.DM.09G026810.1	348.654	-1.12795	0.267913	-4.21011	2.55241e-05	0.00107106	Protein kinase superfamily protein
Soltu.DM.09G005720.1	450.288	-1.12601	0.303304	-3.71248	0.000205235	0.00535523	PHE ammonia lyase
Soltu.DM.11G005840.1	58.1661	-1.12581	0.348444	-3.23095	0.0012338	0.0208386	UDP-Glycosyltransferase superfamily protein
Soltu.DM.05G007540.1	138.141	-1.12549	0.154782	-7.27146	3.55636e-13	1.51367e-10	peptidase M20/M25/M40 family protein
Soltu.DM.07G006090.1	521.399	-1.12224	0.269053	-4.17108	3.03153e-05	0.00122506	Organ specific protein domain containing protein
Soltu.DM.10G003300.1	1040.8	-1.12213	0.267133	-4.20067	2.66131e-05	0.00110684	glutathione S-transferase TAU
Soltu.DM.06G007030.1	591.817	-1.12183	0.293459	-3.82277	0.00013196	0.00383057	ethylene-dependent gravitropism-deficient and yellow-green-like
Soltu.DM.01G027030.1	336.786	-1.12157	0.206613	-5.42834	5.68799e-08	6.55072e-06	NAD(P)-binding Rossmann-fold superfamily protein
Soltu.DM.11G021250.1	4091.92	-1.11951	0.244767	-4.57379	4.78977e-06	0.000266999	conserved hypothetical protein
Soltu.DM.11G005520.1	103.648	-1.11913	0.296933	-3.76895	0.000163938	0.00452632	UDP-Glycosyltransferase superfamily protein
Soltu.DM.05G024430.1	55.3384	-1.11563	0.345059	-3.23315	0.00122434	0.0207151	glutamate decarboxylase
Soltu.DM.02G019440.1	196.931	-1.11487	0.295701	-3.77028	0.000163063	0.0045212	hypothetical protein
Soltu.DM.10G021450.3	1066.96	-1.11299	0.170236	-6.53794	6.23718e-11	1.51416e-08	UDP-Glycosyltransferase superfamily protein
Soltu.DM.05G000050.1	322.842	-1.11234	0.227869	-4.88149	1.05285e-06	7.73659e-05	EXS (ERD1/XPR1/SYG1) family protein
Soltu.DM.11G005730.1	433.332	-1.10878	0.203874	-5.43855	5.37151e-08	6.24257e-06	UDP-Glycosyltransferase superfamily protein
Soltu.DM.05G006570.1	4159.69	-1.1078	0.134513	-8.23561	1.7864e-16	1.62627e-13	thioredoxin
Soltu.DM.10G025920.1	44.2383	-1.10764	0.28561	-3.87816	0.000105249	0.00319381	exostosin family protein
Soltu.DM.03G030400.2	223.308	-1.10444	0.262288	-4.21078	2.54489e-05	0.00106928	2-oxoglutarate (2OG) and Fe(II)-dependent oxygenase superfamily protein
Soltu.DM.11G005450.1	157.342	-1.10354	0.311905	-3.53807	0.000403059	0.00903639	UDP-Glycosyltransferase superfamily protein
Soltu.DM.02G021540.1	206.26	-1.10275	0.268852	-4.10171	4.10105e-05	0.00154179	3beta-hydroxysteroid-dehydrogenase/decarboxylase isoform
Soltu.DM.12G025420.1	298.301	-1.09807	0.216821	-5.06441	4.0966e-07	3.54243e-05	Senescence/dehydration-associated protein-related
Soltu.DM.09G020930.2	155.916	-1.09631	0.231452	-4.73668	2.17248e-06	0.000139605	pfkB-like carbohydrate kinase family protein
Soltu.DM.02G020430.1	419.439	-1.09519	0.298921	-3.66379	0.000248511	0.00619242	WRKY DNA-binding protein
Soltu.DM.03G034540.1	541.712	-1.09488	0.215829	-5.07291	3.91772e-07	3.41477e-05	lysophospholipase
Soltu.DM.01G033000.1	184.688	-1.09444	0.24095	-4.5422	5.56713e-06	0.000301658	beta-hydroxyisobutyryl-CoA hydrolase
Soltu.DM.01G047200.1	369.449	-1.09111	0.310918	-3.50932	0.000449249	0.00977639	UDP-glucosyl transferase 73B5
Soltu.DM.10G002020.1	1550.55	-1.08868	0.315229	-3.45362	0.000553106	0.0115679	Auxin-responsive GH3 family protein
Soltu.DM.08G008670.1	92.9475	-1.08358	0.233026	-4.65006	3.31841e-06	0.000195954	myosin heavy chain-related
Soltu.DM.11G021860.1	212.84	-1.08033	0.348269	-3.102	0.00192215	0.0288041	Glycosyl hydrolase superfamily protein
Soltu.DM.06G000400.1	91.3206	-1.07476	0.265534	-4.04756	5.17554e-05	0.00184367	cation/hydrogen exchanger
Soltu.DM.10G016620.3	762.295	-1.07169	0.337389	-3.17643	0.00149102	0.0238135	PsbP-like protein
Soltu.DM.06G012470.1	953.411	-1.07134	0.351269	-3.04992	0.00228903	0.0326939	Plant stearoyl-acyl-carrier-protein desaturase family protein
Soltu.DM.02G024970.1	893.97	-1.07132	0.333369	-3.21363	0.00131069	0.0218157	Galactose mutarotase-like superfamily protein
Soltu.DM.11G005530.1	568.985	-1.07016	0.225668	-4.7422	2.11409e-06	0.000137198	UDP-Glycosyltransferase superfamily protein
Soltu.DM.01G022430.1	157.903	-1.06632	0.283801	-3.75727	0.00017178	0.00467199	GTP1/OBG family protein
Soltu.DM.03G037370.1	184.163	-1.06612	0.276909	-3.85007	0.000118084	0.00351178	conserved hypothetical protein
Soltu.DM.06G014520.1	125.724	-1.06534	0.305191	-3.49074	0.000481682	0.010311	Peroxisomal membrane 22 kDa (Mpv17/PMP22) family protein
Soltu.DM.12G024590.1	474.74	-1.06129	0.225928	-4.69746	2.63418e-06	0.000163814	Replication factor-A protein 1-related
Soltu.DM.12G002960.1	7486.42	-1.06106	0.156289	-6.78907	1.12858e-11	3.48933e-09	potassium channel beta subunit
Soltu.DM.10G003750.1	100.267	-1.058	0.324953	-3.25585	0.00113052	0.019537	Protein of unknown function (DUF640)
Soltu.DM.07G022530.1	3876.64	-1.05604	0.186413	-5.66504	1.46986e-08	1.97425e-06	glutathione S-transferase TAU
Soltu.DM.05G012430.1	5433.76	-1.05484	0.153741	-6.86115	6.83095e-12	2.26132e-09	senescence-associated gene
Soltu.DM.01G002320.1	79.4546	-1.05104	0.261503	-4.01923	5.83895e-05	0.00201008	Subtilisin-like serine endopeptidase family protein
Soltu.DM.09G004540.1	8740.74	-1.04864	0.155331	-6.751	1.46825e-11	4.37444e-09	Sulfite exporter TauE/SafE family protein
Soltu.DM.09G025220.1	6712.85	-1.04663	0.212273	-4.93057	8.19916e-07	6.30777e-05	ATP sulfurylase
Soltu.DM.02G029530.1	139.906	-1.03965	0.331035	-3.14061	0.00168596	0.0261124	cytochrome P450, family 76, subfamily C, polypeptide
Soltu.DM.12G009170.1	249.354	-1.03931	0.309165	-3.36166	0.000774767	0.0148228	NAD(P)-binding Rossmann-fold superfamily protein
Soltu.DM.06G023420.1	327.16	-1.0383	0.269282	-3.85581	0.000115345	0.0034384	Nucleotide-diphospho-sugar transferases superfamily protein
Soltu.DM.09G024070.1	93.4461	-1.03755	0.25729	-4.03263	5.5156e-05	0.00192711	Leucine-rich repeat (LRR) family protein
Soltu.DM.07G022440.1	4403.1	-1.03425	0.251673	-4.10947	3.96562e-05	0.00150428	glutathione S-transferase TAU
Soltu.DM.01G026780.1	260.641	-1.03165	0.247512	-4.16807	3.07191e-05	0.0012368	Subtilase family protein
Soltu.DM.08G022210.3	136.837	-1.03145	0.337974	-3.05188	0.00227413	0.0325175	shikimate kinase like
Soltu.DM.02G006310.1	85.0677	-1.0266	0.306295	-3.35168	0.000803218	0.0151898	cytochrome BC1 synthesis
Soltu.DM.04G028270.1	8072.21	-1.0247	0.227654	-4.50114	6.7589e-06	0.000357273	Oxidoreductase family protein
Soltu.DM.06G015830.3	55.2984	-1.02222	0.284474	-3.59337	0.000326426	0.00767019	hypothetical protein
StCLE12	122.48	-1.02067	0.231513	-4.4087	1.03991e-05	0.000513267	StCLE12
Soltu.DM.08G029180.1	889.745	-1.0188	0.274487	-3.71167	0.000205896	0.00536821	conserved hypothetical protein
Soltu.DM.04G027930.2	801.712	-1.01824	0.249641	-4.07881	4.52659e-05	0.00166312	DNAse I-like superfamily protein
Soltu.DM.07G019150.3	89.4007	-1.01616	0.298463	-3.40466	0.000662473	0.0132305	Tetratricopeptide repeat (TPR)-like superfamily protein
Soltu.DM.01G026010.1	189.022	-1.01485	0.203805	-4.97951	6.37448e-07	5.22277e-05	purple acid phosphatase
Soltu.DM.11G005740.1	434.155	-1.01391	0.281195	-3.60574	0.000311266	0.00736543	UDP-glucose:flavonoid 3-o-glucosyltransferase
Soltu.DM.03G015330.1	292.672	-1.01247	0.292206	-3.46491	0.000530418	0.0111862	Plastid-lipid associated protein PAP / fibrillin family protein
Soltu.DM.04G037130.1	53.8363	-1.01066	0.310468	-3.25529	0.00113278	0.0195496	phospholipase D delta
Soltu.DM.11G021720.1	113.994	-1.00991	0.275719	-3.66282	0.000249456	0.0061992	P-glycoprotein
Soltu.DM.01G033130.1	209.111	-1.00756	0.191689	-5.25621	1.47055e-07	1.45164e-05	NAD(P)-binding Rossmann-fold superfamily protein
Soltu.DM.07G018070.1	186.332	-1.00619	0.295935	-3.40004	0.00067377	0.0134108	basic helix-loop-helix (bHLH) DNA-binding superfamily protein
Soltu.DM.09G008230.1	17711	-1.006	0.189367	-5.31243	1.08171e-07	1.11956e-05	cation exchanger
Soltu.DM.09G005410.1	103.175	-1.00391	0.245242	-4.09356	4.24806e-05	0.00158748	acylphosphatase family
Soltu.DM.01G037560.1	730.318	-1.00047	0.170408	-5.87106	4.33024e-09	6.8558e-07	Esterase/lipase/thioesterase family protein

## Sheet: DEGs_+N_CLE4(G6T)_control_leaf
Differentially expressed genes (DEGs) in WT relative to StCLE4(G6T) in leaves from nitrogen-rich media grown plants.
GID	baseMean	log2FoldChange	lfcSE	stat	pvalue	padj	Annotation
Soltu.DM.06G023780.1	90.222	9.96588	2.309	4.3161	1.5881e-05	0.00041101	phospholipase D alpha
Soltu.DM.11G021380.2	82.5883	9.83819	3.30841	2.97369	0.0029424	0.0290804	RNA-binding (RRM/RBD/RNP motifs) family protein
Soltu.DM.03G022990.2	80.8752	9.80776	3.33135	2.94408	0.00323917	0.0313945	hAT transposon superfamily
Soltu.DM.03G020440.2	69.1132	9.58142	3.30608	2.89812	0.00375402	0.0352653	MIF4G domain-containing protein / MA3 domain-containing protein
Soltu.DM.02G001720.3	68.2247	9.56291	2.50023	3.82481	0.000130873	0.00242895	Tudor/PWWP/MBT domain-containing protein
Soltu.DM.12G002300.4	59.1831	9.35744	3.35416	2.7898	0.00527405	0.045935	P-loop containing nucleoside triphosphate hydrolases superfamily protein
Soltu.DM.07G027740.3	58.39	9.33797	3.36252	2.77707	0.00548509	0.0472342	Aldolase superfamily protein
Soltu.DM.04G003490.2	57.84	9.32495	2.2435	4.15643	3.23261e-05	0.000737223	CHASE domain containing histidine kinase protein
Soltu.DM.05G023730.2	57.5874	9.316	1.25152	7.44375	9.78682e-14	2.08081e-11	pleiotropic drug resistance
Soltu.DM.11G026250.3	56.5955	9.29323	3.33921	2.78307	0.00538479	0.0466696	P-loop containing nucleoside triphosphate hydrolases superfamily protein
Soltu.DM.04G035600.1	49.3427	9.09578	1.25308	7.25874	3.90703e-13	7.1331e-11	NmrA-like negative transcriptional regulator family protein
Soltu.DM.01G032480.2	45.9136	8.99158	2.29177	3.92342	8.73001e-05	0.00172004	ARM repeat superfamily protein
Soltu.DM.12G004670.1	45.5048	8.9821	1.30879	6.86292	6.7467e-12	9.60347e-10	xylem cysteine peptidase
Soltu.DM.04G035850.1	44.4928	8.94242	1.25276	7.13817	9.45844e-13	1.61288e-10	TRAM, LAG1 and CLN8 (TLC) lipid-sensing domain containing protein
Soltu.DM.03G000810.2	40.2004	8.79891	2.32494	3.78458	0.000153967	0.00276886	Kinase-related protein of unknown function (DUF1296)
Soltu.DM.02G034370.2	38.3407	8.72925	1.98114	4.40617	1.05212e-05	0.000290896	actin related protein
Soltu.DM.12G024030.1	37.9579	8.7161	2.32749	3.74485	0.0001805	0.00316139	Pyridoxal phosphate (PLP)-dependent transferases superfamily protein
Soltu.DM.04G007590.2	35.6498	8.62592	2.39588	3.60032	0.000317828	0.00503622	RNA-binding (RRM/RBD/RNP motifs) family protein
Soltu.DM.07G026240.3	35.3827	8.61576	2.27637	3.78487	0.000153791	0.00276716	conserved hypothetical protein
Soltu.DM.04G011800.1	35.2848	8.6104	2.53625	3.39494	0.000686444	0.00933759	N-acetylglucosaminyl transferase component family protein / Gpi1 family protein
Soltu.DM.09G018370.1	34.4941	8.57753	1.28632	6.66825	2.58877e-11	3.15089e-09	Pectin lyase-like superfamily protein
Soltu.DM.10G023790.2	69.579	8.57348	2.88456	2.9722	0.00295672	0.0291961	related to AP2.7
Soltu.DM.06G026720.4	116.864	8.56974	1.87701	4.56563	4.97997e-06	0.000153479	Histidine kinase-, DNA gyrase B-, and HSP90-like ATPase family protein
Soltu.DM.06G019680.2	33.2262	8.52427	2.29278	3.71788	0.000200904	0.00346259	TBP-associated factor
Soltu.DM.05G013280.2	32.888	8.5101	2.33321	3.64738	0.000264923	0.00435826	RNA-binding protein-related
Soltu.DM.02G004970.2	29.6056	8.35771	1.37992	6.05666	1.38976e-09	1.16716e-07	plant intracellular ras group-related LRR
Soltu.DM.08G010660.1	28.7974	8.32069	1.5393	5.40548	6.46333e-08	3.47953e-06	MLP-like protein
Soltu.DM.06G021840.2	28.6841	8.31302	2.29116	3.62831	0.000285288	0.00462086	Ubiquitin carboxyl-terminal hydrolase family protein
Soltu.DM.02G024250.4	28.3992	8.29764	2.43348	3.40978	0.000650147	0.00896028	Protein kinase superfamily protein
Soltu.DM.06G022900.1	26.9997	8.22194	1.34066	6.13275	8.63704e-10	7.61533e-08	myo-inositol oxygenase
Soltu.DM.05G008970.3	26.0881	8.17631	2.36005	3.46447	0.000531277	0.00760425	pantothenate kinase
Soltu.DM.06G032970.2	25.3077	8.12955	1.43165	5.67844	1.35925e-08	8.83032e-07	RNA-binding KH domain-containing protein
Soltu.DM.10G014340.1	25.0872	8.12247	1.46352	5.54996	2.85729e-08	1.67221e-06	MLP-like protein
Soltu.DM.02G018050.2	25.0876	8.11944	2.5579	3.17426	0.0015022	0.0173652	ARM repeat superfamily protein
Soltu.DM.04G001410.1	24.4669	8.08338	2.33648	3.45964	0.000540889	0.00771226	MLP-like protein
Soltu.DM.12G001040.3	23.5798	8.02948	2.31455	3.46913	0.000522137	0.00748743	scarecrow-like
Soltu.DM.10G024740.1	22.7872	7.97542	1.27793	6.24089	4.35076e-10	4.19986e-08	Nucleotide-diphospho-sugar transferases superfamily protein
Soltu.DM.09G030400.1	22.5995	7.96934	1.50406	5.29855	1.16725e-07	5.78338e-06	hypothetical protein
Soltu.DM.02G025770.2	22.3139	7.94969	2.3296	3.41247	0.000643764	0.0088886	conserved hypothetical protein
Soltu.DM.07G012580.2	75.4952	7.93898	1.99955	3.97038	7.17581e-05	0.00146896	O-fucosyltransferase family protein
Soltu.DM.02G023480.1	22.0614	7.93421	2.34263	3.38689	0.000706909	0.00954853	PLAC8 family protein
Soltu.DM.09G028530.1	20.709	7.84042	1.31489	5.96279	2.47967e-09	1.94172e-07	transcription factor jumonji (jmjC) domain-containing protein
Soltu.DM.03G013520.3	20.576	7.83455	2.27917	3.43746	0.000587187	0.0082464	Protein of unknown function (DUF3133)
Soltu.DM.02G005900.2	20.5401	7.82968	2.38442	3.28368	0.0010246	0.0128048	2-oxoglutarate (2OG) and Fe(II)-dependent oxygenase superfamily protein
Soltu.DM.12G019310.1	20.0855	7.79944	2.39065	3.26248	0.00110442	0.01365	conserved hypothetical protein
Soltu.DM.03G012510.2	19.1493	7.72776	1.80222	4.28791	1.80359e-05	0.000453843	NAD(P)-binding Rossmann-fold superfamily protein
Soltu.DM.06G003710.1	18.4626	7.67974	1.71599	4.47541	7.62662e-06	0.000219303	lipid transfer protein
Soltu.DM.12G000410.1	18.5214	7.67927	1.4194	5.41023	6.29431e-08	3.39944e-06	NAD(P)-binding Rossmann-fold superfamily protein
Soltu.DM.09G006330.2	17.5254	7.60085	2.36502	3.21387	0.0013096	0.0156727	alpha/beta-Hydrolases superfamily protein
Soltu.DM.04G003170.1	17.1449	7.57114	2.37016	3.19436	0.00140139	0.0164778	Polyketide cyclase/dehydrase and lipid transport superfamily protein
Soltu.DM.09G021680.1	17.1359	7.56469	1.33416	5.67001	1.42789e-08	9.18909e-07	FAD-binding Berberine family protein
Soltu.DM.11G010690.1	16.6546	7.52286	1.29833	5.79427	6.86201e-09	4.79242e-07	gibberellin 20-oxidase
Soltu.DM.12G008450.1	15.6865	7.43991	2.51205	2.9617	0.0030595	0.0299994	UDP-D-glucose/UDP-D-galactose 4-epimerase
Soltu.DM.10G002820.2	62.6721	7.42778	1.9927	3.72749	0.000193395	0.00335055	phosphoenolpyruvate carboxylase
Soltu.DM.05G007860.2	15.1841	7.39518	2.44966	3.01886	0.00253729	0.0258405	Major facilitator superfamily protein
Soltu.DM.01G039360.1	13.5909	7.24058	1.34577	5.38024	7.43886e-08	3.91683e-06	Actin-binding FH2 (formin homology 2) family protein
Soltu.DM.03G029410.2	13.5839	7.23323	2.42249	2.98587	0.00282775	0.0281626	hypothetical protein
Soltu.DM.11G021060.4	13.5233	7.22852	2.53436	2.85221	0.00434166	0.0394507	Protein kinase superfamily protein
Soltu.DM.07G014040.1	12.8046	7.15416	1.42115	5.03408	4.80152e-07	2.01733e-05	Pectin lyase-like superfamily protein
Soltu.DM.03G006820.1	12.6233	7.12841	2.38016	2.99493	0.00274505	0.0274801	COBRA-like extracellular glycosyl-phosphatidyl inositol-anchored protein family
Soltu.DM.03G026020.1	12.1494	7.07683	1.46221	4.8398	1.29968e-06	4.77683e-05	myb domain protein
Soltu.DM.06G019170.1	12.0334	7.05949	2.36747	2.98188	0.00286488	0.0284565	pinoresinol reductase
Soltu.DM.03G031440.1	11.6735	7.01067	1.58115	4.43389	9.25457e-06	0.000259272	SPFH/Band 7/PHB domain-containing membrane-associated protein family
Soltu.DM.01G027280.2	11.5665	6.99958	2.51921	2.77849	0.00546129	0.0471421	PHD finger family protein
Soltu.DM.01G023500.1	11.1985	6.96252	1.44519	4.81771	1.45213e-06	5.26227e-05	DUF679 domain membrane protein
Soltu.DM.05G022990.4	10.703	6.88919	2.39752	2.87347	0.00405996	0.0374379	BTB/POZ/MATH-domains containing protein
Soltu.DM.03G023690.1	10.6578	6.88648	1.59271	4.32374	1.53405e-05	0.000399794	Potato type II proteinase inhibitor family domain containing protein
Soltu.DM.11G022930.1	10.6506	6.88409	2.39795	2.87082	0.0040941	0.0376906	Nucleotide/sugar transporter family protein
Soltu.DM.03G002460.1	10.612	6.87829	1.54874	4.44121	8.94536e-06	0.000251676	HXXXD-type acyl-transferase family protein
Soltu.DM.12G008160.1	10.5289	6.86577	1.33045	5.16047	2.4633e-07	1.12127e-05	Protein of unknown function (DUF604)
Soltu.DM.03G000200.1	10.481	6.85591	1.32805	5.16238	2.43829e-07	1.1129e-05	amine oxidase
Soltu.DM.09G030320.1	10.2698	6.83843	1.49945	4.56064	5.09989e-06	0.000156314	FKBP-type peptidyl-prolyl cis-trans isomerase family protein
Soltu.DM.01G002590.2	10.2822	6.83193	2.38574	2.86365	0.00418797	0.0383133	conserved hypothetical protein
Soltu.DM.01G029640.2	9.67135	6.74554	2.42159	2.78558	0.00534322	0.0463931	Fatty acid hydroxylase superfamily
Soltu.DM.06G002170.1	9.26949	6.67879	1.43401	4.65742	3.20196e-06	0.000105042	hypothetical protein
Soltu.DM.04G021070.1	8.9018	6.62804	1.38198	4.79606	1.61816e-06	5.75836e-05	Cyclopropane-fatty-acyl-phospholipid synthase
Soltu.DM.02G034120.1	8.75088	6.60418	1.50797	4.3795	1.18949e-05	0.000323028	Cupredoxin superfamily protein
Soltu.DM.01G048520.1	8.65535	6.58579	1.43005	4.60529	4.1189e-06	0.000130534	methyl esterase
Soltu.DM.02G019740.1	8.40643	6.53268	1.45107	4.50199	6.73194e-06	0.000197163	gibberellin 2-oxidase
Soltu.DM.12G001220.1	8.20998	6.5158	1.51646	4.29671	1.7335e-05	0.000440161	Signal transduction histidine kinase
Soltu.DM.07G014300.4	31.5131	6.45687	2.20118	2.93337	0.00335304	0.0322378	phytochrome interacting factor 3-like
Soltu.DM.02G015410.1	34.9644	6.39538	1.21542	5.26188	1.42587e-07	6.93186e-06	cellulose synthase family protein
Soltu.DM.12G028710.1	203.007	6.38119	0.831156	7.67749	1.6224e-14	3.78482e-12	protodermal factor
Soltu.DM.07G016090.1	6.7894	6.24209	1.53378	4.06974	4.70655e-05	0.00102202	Auxin-responsive family protein
Soltu.DM.05G027160.1	6.70136	6.2115	1.53939	4.03505	5.45899e-05	0.00116508	Eukaryotic aspartyl protease family protein
Soltu.DM.03G028850.3	6.43082	6.1541	1.5537	3.96093	7.46596e-05	0.00151635	basic helix-loop-helix (bHLH) DNA-binding superfamily protein
Soltu.DM.02G014780.1	6.17265	6.10417	1.45208	4.20373	2.62546e-05	0.000623743	GDSL-like Lipase/Acylhydrolase superfamily protein
Soltu.DM.03G023660.1	5.91599	6.04537	1.96981	3.06901	0.0021477	0.0227071	Potato type II proteinase inhibitor family domain containing protein
Soltu.DM.06G032500.1	5.57931	5.94556	1.45098	4.09761	4.17434e-05	0.000919532	Protein kinase superfamily protein
Soltu.DM.01G041720.1	5.42939	5.91296	1.59246	3.71309	0.000204748	0.00351432	Disease resistance protein (TIR-NBS-LRR class) family
Soltu.DM.03G015150.1	4.86374	5.75077	1.4808	3.88357	0.000102934	0.00198613	Bifunctional inhibitor/lipid-transfer protein/seed storage 2S albumin superfamily protein
Soltu.DM.07G007920.2	41.9007	5.68357	1.50756	3.77004	0.000163219	0.00290721	Tesmin/TSO1-like CXC domain-containing protein
Soltu.DM.09G028080.1	4.44261	5.61394	1.66939	3.36288	0.000771351	0.0102497	Serinc-domain containing serine and sphingolipid biosynthesis protein
Soltu.DM.09G006000.1	4.41915	5.61117	1.56027	3.59629	0.000322787	0.00508899	FASCICLIN-like arabinogalactan-protein
Soltu.DM.02G026270.1	4.41991	5.61083	1.58027	3.55055	0.000384423	0.00584869	Zinc finger C-x8-C-x5-C-x3-H type family protein
Soltu.DM.02G008070.1	4.34364	5.59031	1.75801	3.1799	0.00147324	0.0170892	Protein of unknown function (DUF579)
Soltu.DM.12G014510.1	21.3142	5.57547	1.5784	3.53236	0.000411871	0.00619336	Haloacid dehalogenase-like hydrolase (HAD) superfamily protein
Soltu.DM.09G029020.2	8.29408	5.53186	1.51037	3.66259	0.000249677	0.00415012	HMG (high mobility group) box protein with ARID/BRIGHT DNA-binding domain
Soltu.DM.12G001330.1	3.93699	5.4459	1.5992	3.40539	0.000660698	0.00904804	conserved hypothetical protein
Soltu.DM.01G022170.3	3.9019	5.43456	1.64605	3.30158	0.000961434	0.0121556	cullin
Soltu.DM.09G006280.2	31.8005	5.40242	1.55332	3.47798	0.000505205	0.00729208	P-loop containing nucleoside triphosphate hydrolases superfamily protein
Soltu.DM.06G017780.1	3.75242	5.38708	1.61199	3.34188	0.000832131	0.0108727	cation/hydrogen exchanger
Soltu.DM.10G003360.1	3.7521	5.38628	1.64719	3.26999	0.00107553	0.013347	alpha/beta-Hydrolases superfamily protein
Soltu.DM.12G007450.1	3.56866	5.29717	1.71188	3.09436	0.00197237	0.0211687	NAD(P)-binding Rossmann-fold superfamily protein
Soltu.DM.04G015140.2	27.8281	5.24431	1.69319	3.0973	0.0019529	0.0210269	squamosa promoter binding protein-like
Soltu.DM.01G021150.1	3.35813	5.20488	1.74492	2.98288	0.00285554	0.0283934	hypothetical protein
Soltu.DM.01G041630.3	3.13441	5.1189	1.6939	3.02196	0.00251142	0.0256198	Nucleotide-diphospho-sugar transferases superfamily protein
Soltu.DM.03G008250.1	2.88765	4.99634	1.75398	2.84857	0.00439165	0.0397973	IQ-domain
Soltu.DM.03G002390.1	13.0458	4.97937	1.30419	3.81797	0.000134552	0.00248079	sugar transporter
Soltu.DM.01G004980.1	2.7411	4.92924	1.73355	2.84344	0.00446291	0.0402351	Photosystem II 5 kD protein
Soltu.DM.01G000290.1	63.072	4.92478	1.59102	3.09537	0.00196569	0.0211171	UDP-Glycosyltransferase / trehalose-phosphatase family protein
Soltu.DM.09G028290.1	2.7029	4.91364	1.76626	2.78195	0.00540341	0.0467586	glycine-rich protein
Soltu.DM.01G035360.1	12.3085	4.84739	1.15756	4.18758	2.8195e-05	0.000658203	RAB GTPase homolog A3
Soltu.DM.10G010480.4	63.7929	4.80969	1.40372	3.42639	0.000611672	0.0085261	histone acetyltransferase of the GNAT family
Soltu.DM.06G028330.1	10.6736	4.8039	1.58174	3.0371	0.00238866	0.0246142	response to low sulfur
Soltu.DM.09G009520.1	25.6857	4.7993	1.11109	4.31946	1.56412e-05	0.000405429	methyl esterase
Soltu.DM.08G019140.1	86.9793	4.78106	0.633182	7.55085	4.32436e-14	9.62041e-12	Protein of unknown function (DUF_B2219) domain containing protein
Soltu.DM.06G003070.3	127.074	4.69134	1.08312	4.33133	1.48213e-05	0.000389282	glutamine-dependent asparagine synthase
Soltu.DM.03G002670.1	41.2919	4.67764	0.995966	4.69658	2.64549e-06	8.89589e-05	APS reductase
Soltu.DM.10G025930.2	39.1329	4.67687	1.68371	2.77772	0.00547423	0.0471528	Leucine-rich repeat protein kinase family protein
Soltu.DM.12G003060.1	7.77089	4.61683	1.59568	2.89333	0.00381179	0.0356944	Chalcone and stilbene synthase family protein
Soltu.DM.08G028540.1	15.1525	4.60614	1.53171	3.00718	0.0026368	0.026616	Disease resistance-responsive (dirigent-like protein) family protein
Soltu.DM.02G020270.1	66.1436	4.59523	1.02491	4.48354	7.3414e-06	0.000211872	SKU5 similar
Soltu.DM.02G003420.2	98.7576	4.57771	1.35289	3.38366	0.00071526	0.00964765	cinnamyl alcohol dehydrogenase
Soltu.DM.09G001980.1	19.1163	4.5574	1.41392	3.22323	0.00126752	0.015278	laccase
Soltu.DM.06G028000.1	36.392	4.55277	0.894522	5.08961	3.58801e-07	1.55726e-05	hydroxysteroid dehydrogenase
Soltu.DM.09G028650.1	258.787	4.51138	0.845663	5.33473	9.56889e-08	4.85571e-06	Tetratricopeptide repeat (TPR)-like superfamily protein
Soltu.DM.02G002060.1	17.413	4.45212	1.26998	3.50565	0.000455486	0.00671692	alpha/beta-Hydrolases superfamily protein
Soltu.DM.05G022630.5	28.8355	4.43956	1.2269	3.61852	0.000296298	0.00476628	Duplicated homeodomain-like superfamily protein
Soltu.DM.06G033950.1	136.653	4.3769	0.846497	5.1706	2.33348e-07	1.07235e-05	Pectin lyase-like superfamily protein
Soltu.DM.03G021370.1	86.4401	4.36616	0.781014	5.59038	2.26579e-08	1.38139e-06	Heavy metal transport/detoxification superfamily protein
Soltu.DM.12G022190.1	18.6152	4.29524	1.25156	3.43191	0.000599344	0.00839606	Auxin-responsive GH3 family protein
Soltu.DM.03G036240.1	21.6808	4.2865	1.22369	3.50292	0.000460188	0.0067566	phospholipase D alpha
Soltu.DM.09G018490.1	54.6991	4.26316	1.18981	3.58304	0.000339617	0.00529409	hypothetical protein
Soltu.DM.09G001130.1	33.3288	4.25464	1.41826	2.99989	0.00270076	0.0271231	Protein kinase protein with tetratricopeptide repeat domain
Soltu.DM.12G010360.1	404.817	4.24681	0.394774	10.7576	5.45794e-27	6.54817e-24	delta tonoplast integral protein
Soltu.DM.04G025750.1	31.3055	4.19307	1.3749	3.04972	0.00229052	0.0238221	tracheary element differentiation-related
Soltu.DM.10G020820.1	22.5102	4.15624	1.36183	3.05195	0.00227363	0.0237052	myb domain protein
Soltu.DM.07G026690.1	9.16668	4.11631	1.36666	3.01196	0.00259567	0.0262756	IAA carboxylmethyltransferase
Soltu.DM.03G028220.1	17.8281	4.03737	1.01375	3.98262	6.81595e-05	0.00140299	polygalacturonase
Soltu.DM.06G029020.2	12.6956	4.03382	1.27531	3.16301	0.00156147	0.0178446	myb domain protein
Soltu.DM.10G025190.1	38.206	4.02294	0.79229	5.07761	3.82218e-07	1.64403e-05	NAD(P)-binding Rossmann-fold superfamily protein
Soltu.DM.12G010360.2	49.2088	3.97689	1.1978	3.32015	0.000899689	0.0115577	tonoplast intrinsic protein
Soltu.DM.06G003070.2	386.84	3.97401	1.35098	2.94157	0.00326557	0.0315866	glutamine-dependent asparagine synthase
Soltu.DM.07G021960.1	56.022	3.94898	0.921959	4.28325	1.84184e-05	0.000462463	protodermal factor
Soltu.DM.09G001540.2	18.407	3.92702	1.27073	3.09037	0.00199907	0.0214005	RNI-like superfamily protein
Soltu.DM.11G010680.1	14.8109	3.9055	0.92063	4.2422	2.21336e-05	0.000541935	gibberellin 20 oxidase
Soltu.DM.10G003260.4	23.9488	3.88359	1.02942	3.77261	0.000161547	0.0028857	Aldolase-type TIM barrel family protein
Soltu.DM.12G027230.1	11.6815	3.87953	1.17207	3.30998	0.000933035	0.0118815	hypothetical protein
Soltu.DM.10G017490.1	40.2548	3.85851	0.6325	6.10041	1.05796e-09	9.13629e-08	hypothetical protein
Soltu.DM.01G019440.1	30.8501	3.81247	0.692961	5.50171	3.76134e-08	2.13353e-06	Peroxidase family protein
Soltu.DM.09G005280.1	67.7224	3.79241	0.494478	7.66951	1.72655e-14	4e-12	xyloglucan endotransglucosylase/hydrolase
Soltu.DM.05G012170.1	23.5546	3.71172	1.26639	2.93095	0.00337926	0.0324378	conserved hypothetical protein
Soltu.DM.12G003070.1	14.3665	3.67985	0.986669	3.72957	0.000191807	0.0033282	Chalcone and stilbene synthase family protein
Soltu.DM.04G000230.2	73.8855	3.66734	1.28542	2.85302	0.00433055	0.0393925	domains rearranged methyltransferase
Soltu.DM.07G021730.1	174.821	3.66587	0.396895	9.23638	2.54966e-20	1.45171e-17	Calcium-dependent phosphotriesterase superfamily protein
Soltu.DM.03G015220.1	34.1325	3.6608	0.498988	7.33646	2.19322e-13	4.23429e-11	Bifunctional inhibitor/lipid-transfer protein/seed storage 2S albumin superfamily protein
Soltu.DM.01G022330.1	53.0552	3.61122	0.653789	5.52353	3.32254e-08	1.90793e-06	Thioredoxin superfamily protein
Soltu.DM.01G049280.1	7.97597	3.57398	1.24296	2.87538	0.00403543	0.0372668	conserved hypothetical protein
Soltu.DM.11G002660.3	138.667	3.56575	0.923156	3.86256	0.000112204	0.00213921	elicitor-activated gene 3-2
Soltu.DM.07G007010.1	103.837	3.56024	0.28982	12.2843	1.09927e-34	3.07732e-31	GNS1/SUR4 membrane protein family
Soltu.DM.06G015970.1	15.8026	3.53903	1.25366	2.82295	0.00475844	0.0422549	Plant stearoyl-acyl-carrier-protein desaturase family protein
Soltu.DM.04G037940.1	223.586	3.52127	1.1393	3.09074	0.00199661	0.0213869	xylem cysteine peptidase
Soltu.DM.09G001900.1	17.3427	3.44602	1.10691	3.11321	0.00185067	0.0201718	laccase
Soltu.DM.09G004290.1	45.3076	3.42801	0.803638	4.26562	1.99348e-05	0.000494951	Nucleotide-diphospho-sugar transferases superfamily protein
Soltu.DM.10G024510.1	5291.6	3.38868	0.375276	9.02984	1.71924e-19	8.18681e-17	gamma tonoplast intrinsic protein
Soltu.DM.06G024390.1	26.9162	3.37275	0.779712	4.32563	1.52094e-05	0.000396683	Integrase-type DNA-binding superfamily protein
Soltu.DM.01G042090.2	277.201	3.35638	0.668139	5.02348	5.07435e-07	2.1123e-05	Zinc finger C-x8-C-x5-C-x3-H type family protein
Soltu.DM.09G009510.1	136.428	3.34335	0.36836	9.0763	1.12324e-19	5.62583e-17	methyl esterase
Soltu.DM.08G004360.1	10.1524	3.27873	0.864649	3.79198	0.00014945	0.00270792	Protein of unknown function (DUF567)
Soltu.DM.12G025790.1	67.4055	3.26704	0.467978	6.98118	2.92717e-12	4.59497e-10	myb-like transcription factor family protein
Soltu.DM.10G005840.1	17.3787	3.25802	0.775461	4.2014	2.65275e-05	0.000629334	Probable membrane-associated kinase regulator
Soltu.DM.01G005860.5	524.448	3.24785	0.785676	4.13383	3.56769e-05	0.000802829	RNA-binding (RRM/RBD/RNP motifs) family protein
Soltu.DM.11G004150.1	3604.39	3.19746	0.411151	7.77686	7.43481e-15	1.83747e-12	dicer-like
Soltu.DM.02G016800.2	14.7225	3.17855	1.04513	3.04128	0.00235573	0.0243646	vascular plant one zinc finger protein
Soltu.DM.09G009450.1	25.9257	3.15672	0.7421	4.25377	2.10204e-05	0.000516939	heat shock protein 17.4
Soltu.DM.09G005250.3	23.8553	3.14373	0.975936	3.22125	0.00127633	0.0153567	ACT-like superfamily protein
Soltu.DM.10G026040.1	18.7459	3.13121	1.04419	2.9987	0.00271134	0.0271968	metacaspase
Soltu.DM.06G006080.3	105.28	3.12515	0.696524	4.48678	7.23081e-06	0.000209401	RING/U-box superfamily protein
Soltu.DM.06G007190.2	33.0958	3.10096	1.12307	2.76116	0.00575972	0.0491082	Domain of unknown function (DUF966)
Soltu.DM.10G028070.1	197.974	3.0811	0.387024	7.96101	1.70636e-15	4.54935e-13	UDP-glucosyltransferase 73B2
Soltu.DM.03G015240.1	81.0061	3.08039	0.599729	5.1363	2.80198e-07	1.25169e-05	Bifunctional inhibitor/lipid-transfer protein/seed storage 2S albumin superfamily protein
Soltu.DM.06G003070.1	18154.8	3.05168	0.334157	9.13248	6.69472e-20	3.62735e-17	glutamine-dependent asparagine synthase
Soltu.DM.07G017240.5	38.9569	3.04316	0.88868	3.42436	0.00061624	0.00857909	terpene synthase
Soltu.DM.01G049850.1	531.943	3.0077	0.362231	8.30325	1.013e-16	3.36929e-14	beta-galactosidase
Soltu.DM.08G003470.6	362.107	25.2213	3.67822	6.85694	7.03533e-12	9.88861e-10	S-adenosyl-L-methionine-dependent methyltransferases superfamily protein
Soltu.DM.02G032930.5	354.022	25.1946	3.67822	6.84966	7.40255e-12	1.03184e-09	carbonic anhydrase
Soltu.DM.10G018250.2	179.754	24.2509	3.67835	6.59289	4.31354e-11	5.1203e-09	phosphorylethanolamine cytidylyltransferase
Soltu.DM.08G010730.4	92.2603	23.32	3.27121	7.12887	1.01195e-12	1.70827e-10	Plant transposase (Ptta/En/Spm family)
Soltu.DM.07G014980.1	275.507	23.0042	3.67826	6.25409	3.99838e-10	3.89326e-08	conserved hypothetical protein
Soltu.DM.02G001720.2	136.452	22.8233	3.67843	6.20462	5.48293e-10	5.14492e-08	Tudor/PWWP/MBT domain-containing protein
Soltu.DM.09G023250.2	121.089	22.7352	3.67847	6.1806	6.38586e-10	5.86121e-08	tetratricopeptide repeat (TPR)-containing protein
Soltu.DM.01G039850.2	57.5155	2.99323	0.816601	3.66547	0.00024688	0.00410566	Protein phosphatase 2C family protein
Soltu.DM.06G034120.1	28.4413	2.96	1.01512	2.91592	0.00354637	0.0337297	Subtilase family protein
Soltu.DM.01G032670.1	25.2564	2.95608	0.837849	3.52817	0.000418436	0.00627523	xylem serine peptidase
Soltu.DM.05G012120.1	116.091	2.94206	1.04866	2.80556	0.00502298	0.0441835	Squamosa promoter-binding protein-like (SBP domain) transcription factor family protein
Soltu.DM.06G031870.1	106.491	2.92073	0.517956	5.63895	1.71089e-08	1.08237e-06	HSP20-like chaperones superfamily protein
Soltu.DM.05G026750.2	2737.91	2.91788	1.02883	2.83612	0.00456652	0.0409645	photosystem I light harvesting complex gene
Soltu.DM.07G015230.1	157.477	2.88947	0.286272	10.0934	5.90635e-24	5.36249e-21	FASCICLIN-like arabinogalactan
Soltu.DM.03G018090.1	9.08941	2.87845	1.04373	2.75785	0.00581835	0.0494825	Protein of unknown function (DUF677)
Soltu.DM.07G023010.1	7.66077	2.87318	1.00515	2.85846	0.00425701	0.0388709	hypothetical protein
Soltu.DM.03G006460.1	17.1269	2.87266	0.917197	3.132	0.00173619	0.019287	glycosyl hydrolase family 81 protein
Soltu.DM.01G027800.1	381.452	2.87265	0.220109	13.0511	6.26717e-39	2.63167e-35	Leucine-rich repeat (LRR) family protein
Soltu.DM.02G027350.1	88.0068	2.85184	0.474719	6.00742	1.88503e-09	1.52588e-07	growth-regulating factor
Soltu.DM.12G009290.1	50.4758	2.84453	0.706861	4.02417	5.71776e-05	0.00120955	NAD(P)-binding Rossmann-fold superfamily protein
Soltu.DM.09G009470.1	50.0902	2.83987	0.45437	6.25014	4.10089e-10	3.98153e-08	heat shock protein 17.4
Soltu.DM.02G004130.1	1359.08	2.82986	0.74718	3.78739	0.000152237	0.00274763	APS reductase
Soltu.DM.03G002990.1	23.344	2.81903	1.01814	2.7688	0.00562637	0.0481993	polyamine oxidase
Soltu.DM.04G009990.1	204.223	2.80334	0.408401	6.86417	6.6878e-12	9.56015e-10	Heavy metal transport/detoxification superfamily protein
Soltu.DM.07G001430.1	15.9964	2.77942	0.868873	3.19888	0.00137965	0.0162905	Plant protein of unknown function (DUF828) with plant pleckstrin homology-like region
Soltu.DM.08G015310.1	52.6651	2.77802	0.657096	4.22773	2.36058e-05	0.000571871	Cellulase (glycosyl hydrolase family 5) protein
Soltu.DM.02G028750.1	21.782	2.75809	0.959002	2.87601	0.00402743	0.0372393	ralf-like
Soltu.DM.03G033140.1	126.183	2.75545	0.226919	12.1429	6.25822e-34	1.40155e-30	WUSCHEL related homeobox
Soltu.DM.10G016960.1	31.7894	2.7451	0.676774	4.05615	4.98888e-05	0.00107663	proline-rich protein
Soltu.DM.07G017900.1	590.001	2.74083	0.509919	5.37503	7.65695e-08	4.0239e-06	isocitrate lyase
Soltu.DM.11G006350.2	278.564	2.72253	0.507613	5.3634	8.16708e-08	4.24044e-06	conserved hypothetical protein
Soltu.DM.04G036000.1	18.6009	2.72073	0.932701	2.91705	0.00353361	0.0336559	Integrase-type DNA-binding superfamily protein
Soltu.DM.10G018830.1	189.283	2.71836	0.565294	4.80876	1.51873e-06	5.46239e-05	lipid transfer protein
Soltu.DM.02G012280.1	3882.74	2.7111	0.152204	17.8122	5.67835e-71	9.53764e-67	ARGONAUTE
Soltu.DM.10G027720.1	11.2329	2.70757	0.817312	3.31277	0.000923768	0.0117903	hypothetical protein
Soltu.DM.02G028110.2	15.058	2.69858	0.585067	4.61242	3.98009e-06	0.000126493	cytochrome p450 81d1
Soltu.DM.08G025250.1	26.752	2.69401	0.702677	3.83392	0.000126117	0.00235591	Bifunctional inhibitor/lipid-transfer protein/seed storage 2S albumin superfamily protein
Soltu.DM.12G004310.2	49.244	2.6872	0.893411	3.0078	0.00263147	0.0265702	growth-regulating factor
Soltu.DM.01G024100.1	8.56993	2.68024	0.837686	3.19958	0.00137629	0.0162738	Eukaryotic aspartyl protease family protein
Soltu.DM.02G016320.1	20.9902	2.67379	0.943619	2.83355	0.00460338	0.0412037	Cysteine proteinases superfamily protein
Soltu.DM.09G018210.1	166.763	2.66128	0.780636	3.40911	0.000651747	0.00897668	Tetratricopeptide repeat (TPR)-like superfamily protein
Soltu.DM.10G003010.1	52.8733	2.64329	0.940665	2.81003	0.00495373	0.0436774	MATE efflux family protein
Soltu.DM.01G023800.1	21.1271	2.6425	0.894485	2.95422	0.00313464	0.0306022	ARM repeat superfamily protein
Soltu.DM.05G002140.1	25.1355	2.62991	0.585983	4.48803	7.18857e-06	0.000208357	RING/U-box superfamily protein
Soltu.DM.03G016520.1	46.7387	2.61128	0.601695	4.33988	1.4256e-05	0.000378278	Peroxidase superfamily protein
Soltu.DM.11G023060.1	12.5748	2.58456	0.928829	2.7826	0.00539246	0.0466999	conserved hypothetical protein
Soltu.DM.09G030930.1	10.5202	2.58272	0.858604	3.00805	0.00262933	0.0265566	cytochrome P450, family 83, subfamily B, polypeptide
Soltu.DM.01G005860.2	338.926	2.58188	0.666728	3.87247	0.000107739	0.00206227	RNA-binding (RRM/RBD/RNP motifs) family protein
Soltu.DM.04G006520.6	27.9029	2.55631	0.892056	2.86564	0.00416166	0.0381426	pentatricopeptide (PPR) repeat-containing protein
Soltu.DM.05G025300.2	314.315	2.55228	0.814368	3.13406	0.00172406	0.0191899	sulfate transporter 4.1
Soltu.DM.11G013310.1	11.2665	2.55068	0.739601	3.44873	0.000563238	0.00798012	Protein of unknown function (DUF579)
Soltu.DM.12G010960.1	379.29	2.54475	0.560602	4.53932	5.6435e-06	0.000169573	Leucine-rich repeat (LRR) family protein
Soltu.DM.12G006340.1	75.58	2.5447	0.5598	4.54573	5.47449e-06	0.000165829	branched-chain amino acid transaminase
Soltu.DM.03G002140.1	6241.7	2.54304	0.287851	8.83458	1.00471e-18	4.44096e-16	Aluminium induced protein with YGL and LRDR motifs
Soltu.DM.09G018510.1	78.1765	2.54171	0.66483	3.8231	0.000131786	0.0024413	hypothetical protein
Soltu.DM.06G033350.1	222.587	2.53125	0.206751	12.243	1.83219e-34	4.39633e-31	Actin binding Calponin homology (CH) domain-containing protein
Soltu.DM.06G008220.1	967.799	2.49363	0.556049	4.48454	7.3071e-06	0.000211064	hypothetical protein
Soltu.DM.03G021180.1	1050.47	2.48988	0.734756	3.38872	0.000702204	0.00950715	response to low sulfur
Soltu.DM.06G013460.1	643.313	2.48301	0.279014	8.89922	5.6238e-19	2.55298e-16	heat shock protein 90.1
Soltu.DM.07G002930.2	37.4798	2.46655	0.681687	3.61831	0.000296536	0.00476628	glucuronidase
Soltu.DM.02G012480.1	79.3049	2.45977	0.420073	5.85557	4.75371e-09	3.44906e-07	cell elongation protein / DWARF1 / DIMINUTO (DIM)
Soltu.DM.04G024310.2	126.245	2.45635	0.654594	3.75248	0.000175096	0.00308281	Protein kinase protein with adenine nucleotide alpha hydrolases-like domain
Soltu.DM.06G022820.1	40.2116	2.45593	0.376914	6.51589	7.22614e-11	8.11865e-09	basic helix-loop-helix (bHLH) DNA-binding superfamily protein
Soltu.DM.02G010840.2	190.45	2.44846	0.475519	5.14902	2.61853e-07	1.17757e-05	DCD (Development and Cell Death) domain protein
Soltu.DM.09G026010.1	110.535	2.4315	0.413093	5.88609	3.95437e-09	2.9344e-07	UDP-Glycosyltransferase superfamily protein
Soltu.DM.11G020830.2	2202.61	2.40306	0.33671	7.13689	9.54636e-13	1.61965e-10	copper/zinc superoxide dismutase
Soltu.DM.04G025250.1	502.529	2.39352	0.406647	5.88598	3.95702e-09	2.9344e-07	Thiamin diphosphate-binding fold (THDP-binding) superfamily protein
Soltu.DM.01G021090.1	19.6707	2.38658	0.859135	2.77789	0.0054713	0.047148	hypothetical protein
Soltu.DM.10G018840.1	447.711	2.37941	0.49782	4.77965	1.75598e-06	6.18329e-05	lipid transfer protein
Soltu.DM.12G009810.1	9.21051	2.3735	0.751495	3.15837	0.00158654	0.0180584	hydroxyproline-rich glycoprotein family protein
Soltu.DM.07G010910.1	59.3859	2.36138	0.40999	5.75961	8.43091e-09	5.71007e-07	myb-like transcription factor family protein
Soltu.DM.09G028330.1	93.9348	2.34477	0.504517	4.64755	3.35903e-06	0.00010966	hypothetical protein
Soltu.DM.07G013250.1	57.0334	2.34108	0.529977	4.41732	9.99325e-06	0.000277305	Plant invertase/pectin methylesterase inhibitor superfamily protein
Soltu.DM.06G003220.1	89.2136	2.32177	0.265022	8.76069	1.94059e-18	7.95004e-16	josephin protein-related
Soltu.DM.04G008010.1	16.1068	2.30777	0.717553	3.21617	0.00129915	0.015578	Thioredoxin superfamily protein
Soltu.DM.11G021350.1	34.4965	2.29872	0.406608	5.65341	1.57295e-08	1.00266e-06	Stress responsive A/B Barrel Domain
Soltu.DM.01G043860.1	99.2723	2.29833	0.325849	7.05335	1.74661e-12	2.83448e-10	conserved hypothetical protein
Soltu.DM.11G016790.1	536.023	2.29764	0.372777	6.16359	7.1116e-10	6.43935e-08	osmotin
Soltu.DM.07G011520.1	73.5143	2.29441	0.534897	4.28943	1.79131e-05	0.000451768	GATA type zinc finger transcription factor family protein
Soltu.DM.01G032190.1	312.293	2.29407	0.216556	10.5934	3.19821e-26	3.70474e-23	FASCICLIN-like arabinogalactan protein
Soltu.DM.01G037780.3	113.411	2.27736	0.713461	3.19198	0.00141299	0.0165736	arginine-rich cyclin
Soltu.DM.02G010870.2	59.4586	2.27284	0.783734	2.90002	0.00373141	0.035102	Major facilitator superfamily protein
Soltu.DM.06G020800.1	39.5158	2.27035	0.61321	3.7024	0.000213568	0.00363628	GDSL-like Lipase/Acylhydrolase superfamily protein
Soltu.DM.06G029660.1	112.611	2.26111	0.42925	5.26759	1.38223e-07	6.74901e-06	Pollen Ole e 1 allergen and extensin family protein
Soltu.DM.02G019930.1	312.994	2.26098	0.542623	4.16675	3.08971e-05	0.000711396	cytochrome P450, family 77, subfamily B, polypeptide
Soltu.DM.03G031860.1	166.417	2.25253	0.471273	4.77968	1.75578e-06	6.18329e-05	heat shock protein 70B
Soltu.DM.02G004660.1	41.3184	2.24639	0.402951	5.57485	2.47747e-08	1.49418e-06	AMP-dependent synthetase and ligase family protein
Soltu.DM.01G043360.1	155.072	2.24464	0.410598	5.46676	4.58332e-08	2.54492e-06	plantacyanin
Soltu.DM.01G026270.1	52.3456	2.23042	0.468128	4.76455	1.89277e-06	6.59582e-05	RmlC-like cupins superfamily protein
Soltu.DM.03G021190.1	383.429	2.21792	0.71673	3.0945	0.00197145	0.0211655	response to low sulfur
Soltu.DM.10G024900.1	58.0603	2.21335	0.495433	4.4675	7.91381e-06	0.00022587	growth-regulating factor
Soltu.DM.03G015230.1	42.778	2.21242	0.486959	4.54334	5.53709e-06	0.000167273	Bifunctional inhibitor/lipid-transfer protein/seed storage 2S albumin superfamily protein
Soltu.DM.02G007280.1	23.3783	2.21215	0.669302	3.30517	0.000949193	0.0120325	hypothetical protein
Soltu.DM.06G002240.1	52.2609	2.20979	0.553444	3.99279	6.53002e-05	0.00135409	Gibberellin-regulated family protein
Soltu.DM.09G002760.1	25.979	2.20851	0.649626	3.39966	0.000674689	0.00921334	alpha/beta-Hydrolases superfamily protein
Soltu.DM.12G008400.1	101.513	2.18811	0.700165	3.12514	0.00177723	0.019581	glycosyl hydrolase 9C2
Soltu.DM.03G007320.1	31.9042	2.18768	0.396657	5.51528	3.48216e-08	1.98939e-06	NOD26-like intrinsic protein 1	2									up_in_NN
Soltu.DM.02G024820.1	70.1073	2.18609	0.385386	5.67245	1.40766e-08	9.09374e-07	galactinol synthase
Soltu.DM.04G000270.3	17.9718	2.18081	0.636188	3.42793	0.000608195	0.00848467	BES1-interacting Myc-like protein
Soltu.DM.10G012850.2	140.937	2.17985	0.722942	3.01525	0.00256766	0.0260748	Disease resistance protein (CC-NBS-LRR class) family
Soltu.DM.07G004510.1	181.98	2.17223	0.272041	7.98492	1.40617e-15	3.80947e-13	MLP-like protein
Soltu.DM.08G021510.1	55.5994	2.17195	0.386367	5.62147	1.89336e-08	1.18663e-06	growth-regulating factor
Soltu.DM.03G010890.1	205.19	2.17189	0.195236	11.1244	9.5424e-29	1.40655e-25	zinc finger protein
Soltu.DM.04G034510.3	33.3476	2.16476	0.703791	3.07586	0.00209897	0.0222783	GA requiring
Soltu.DM.02G032930.4	1021.98	2.15863	0.678015	3.18375	0.00145381	0.0168989	carbonic anhydrase
Soltu.DM.12G003880.1	75.3236	2.15483	0.605047	3.56143	0.000368835	0.0056686	Peroxidase superfamily protein
Soltu.DM.11G026410.1	68.7984	2.14518	0.426994	5.0239	5.06313e-07	2.11117e-05	3-ketoacyl-CoA synthase
Soltu.DM.07G013800.1	20.848	2.1442	0.51114	4.19493	2.72956e-05	0.000641463	Leucine-rich repeat (LRR) family protein
Soltu.DM.09G009460.1	65.0232	2.13911	0.397101	5.38681	7.17177e-08	3.80602e-06	heat shock protein 17.4
Soltu.DM.10G001270.2	173.53	2.13585	0.551578	3.87226	0.000107833	0.00206289	hypothetical protein
Soltu.DM.06G026960.1	84.6629	2.12493	0.352195	6.03339	1.60554e-09	1.32193e-07	BTB and TAZ domain protein
Soltu.DM.11G020830.1	183.358	2.11763	0.443123	4.77888	1.76271e-06	6.2005e-05	copper/zinc superoxide dismutase
Soltu.DM.02G032930.3	696.483	2.11655	0.663894	3.18809	0.00143215	0.0167282	carbonic anhydrase
Soltu.DM.01G044650.1	89.7395	2.11328	0.745137	2.8361	0.00456679	0.0409645	white-brown complex homolog protein
Soltu.DM.01G000040.2	67.4709	2.11025	0.555862	3.79636	0.000146836	0.00266919	Protein XRI1
Soltu.DM.10G007840.1	20.5041	2.10956	0.590845	3.57041	0.000356419	0.0055176	Protein kinase superfamily protein
Soltu.DM.08G024710.4	267.48	2.09973	0.662081	3.17141	0.00151702	0.0174765	Oxidoreductase family protein
Soltu.DM.10G026790.2	45.65	2.09716	0.433472	4.83805	1.3112e-06	4.80865e-05	C2H2 and C2HC zinc fingers superfamily protein
Soltu.DM.08G022980.1	111.8	2.08967	0.372247	5.61368	1.98068e-08	1.23674e-06	nitrate transporter 1.5
Soltu.DM.02G029440.1	84.1921	2.08211	0.36095	5.76842	8.00178e-09	5.50827e-07	cytochrome P450, family 76, subfamily C, polypeptide
Soltu.DM.06G006550.1	158.657	2.07767	0.228597	9.08878	1.00158e-19	5.0979e-17	heat shock protein 81-2
Soltu.DM.07G012590.1	144.38	2.06905	0.740822	2.79291	0.00522369	0.0456028	EIN3-binding F-box protein
Soltu.DM.05G026420.1	25.5094	2.06717	0.503866	4.10261	4.08511e-05	0.000901057	methylenetetrahydrofolate reductase
Soltu.DM.10G021870.1	21.0763	2.0591	0.746081	2.75989	0.00578203	0.0492235	Aminotransferase-like, plant mobile domain family protein
Soltu.DM.02G028110.1	205.84	2.05796	0.215946	9.53001	1.57262e-21	1.12402e-18	cytochrome P450, family 81, subfamily F, polypeptide
Soltu.DM.03G023150.1	214.131	2.05609	0.478887	4.29347	1.75902e-05	0.000445633	Probable membrane-associated kinase regulator
Soltu.DM.10G009650.5	151.323	2.05271	0.506231	4.05489	5.01579e-05	0.00108079	like heterochromatin protein (LHP1)
Soltu.DM.12G004310.1	451.767	2.0524	0.158954	12.9119	3.85786e-38	1.43997e-34	growth-regulating factor
Soltu.DM.02G030160.1	55.5856	2.04386	0.547527	3.7329	0.000189291	0.00329028	Methylenetetrahydrofolate reductase family protein
Soltu.DM.01G041980.1	206.219	2.04159	0.259556	7.86569	3.67079e-15	9.41319e-13	homeobox protein
Soltu.DM.02G020680.1	7.52524	2.03758	0.722446	2.82039	0.0047965	0.0425367	RING/U-box superfamily protein
Soltu.DM.09G021720.1	136.408	2.0276	0.417251	4.85943	1.17724e-06	4.37466e-05	Peroxidase superfamily protein
Soltu.DM.01G023320.2	47.6989	2.01969	0.636568	3.17277	0.0015099	0.0174242	squamosa promoter binding protein-like
Soltu.DM.09G009010.2	47.521	2.01576	0.631074	3.19417	0.00140231	0.0164828	gamma interferon responsive lysosomal thiol (GILT) reductase family protein
Soltu.DM.11G001650.3	448.259	12.2785	3.08145	3.98466	6.75758e-05	0.00139439	Zn-dependent exopeptidases superfamily protein
Soltu.DM.02G017000.1	335.979	11.862	1.21516	9.76165	1.64463e-22	1.3812e-19	NAC domain containing protein
Soltu.DM.04G006870.3	302.409	11.7107	3.26866	3.58273	0.000340024	0.00529504	Transcription factor jumonji (jmj) family protein / zinc finger (C5HC2 type) family protein
Soltu.DM.07G010570.2	291.797	11.6591	3.05433	3.81725	0.00013495	0.00248486	NAD(P)-binding Rossmann-fold superfamily protein
Soltu.DM.10G008290.3	115.88	10.3263	1.57366	6.56198	5.30965e-11	6.12598e-09	RNA-binding (RRM/RBD/RNP motifs) family protein
Soltu.DM.11G004270.2	100.496	1.99409	0.68136	2.92663	0.0034266	0.032821	Transmembrane amino acid transporter family protein
Soltu.DM.01G035630.1	210.532	1.99345	0.356359	5.59394	2.21968e-08	1.35821e-06	Eukaryotic aspartyl protease family protein
Soltu.DM.02G029450.1	61.1324	1.99334	0.404624	4.92639	8.37621e-07	3.26808e-05	cytochrome P450, family 76, subfamily C, polypeptide
Soltu.DM.12G029510.1	314.298	1.98655	0.327473	6.0663	1.30894e-09	1.10759e-07	Aluminium induced protein with YGL and LRDR motifs
Soltu.DM.10G020560.1	118.157	1.98428	0.468775	4.2329	2.30693e-05	0.000561977	actin
Soltu.DM.02G015780.1	22.0253	1.9819	0.67035	2.95652	0.00311131	0.030411	delay of germination
Soltu.DM.09G030320.2	39.4875	1.96951	0.559833	3.51803	0.000434763	0.00645952	rotamase FKBP
Soltu.DM.03G033840.3	107.984	1.96171	0.623857	3.1445	0.00166374	0.0186735	BR enhanced expression
Soltu.DM.01G027180.1	31.01	1.95821	0.544756	3.59466	0.00032482	0.00511804	topoisomerase II
Soltu.DM.09G031710.1	12.6443	1.95396	0.618138	3.16105	0.00157201	0.0179377	conserved hypothetical protein
Soltu.DM.04G036420.1	315.603	1.94442	0.297001	6.54685	5.87638e-11	6.71447e-09	glycosyl hydrolase 9B7
Soltu.DM.02G009250.1	36.8793	1.92502	0.601978	3.19782	0.0013847	0.0163272	ABI five binding protein
Soltu.DM.03G013350.1	385.913	1.92368	0.509947	3.77231	0.000161742	0.00288615	WRKY DNA-binding protein
Soltu.DM.03G006490.1	208.895	1.91047	0.325675	5.8662	4.45895e-09	3.25629e-07	TRICHOME BIREFRINGENCE-LIKE
Soltu.DM.04G025620.1	347.503	1.90765	0.211277	9.02914	1.73031e-19	8.18681e-17	Nodulin MtN3 family protein
Soltu.DM.07G018430.1	340.086	1.90185	0.356221	5.33895	9.34841e-08	4.77992e-06	xyloglucan endotransglucosylase/hydrolase
Soltu.DM.02G026610.1	137.521	1.89791	0.382789	4.95811	7.11806e-07	2.83314e-05	Heavy metal transport/detoxification superfamily protein
Soltu.DM.03G004150.1	129	1.89097	0.456824	4.13938	3.48248e-05	0.00078726	cryptochrome-interacting basic-helix-loop-helix
Soltu.DM.10G004970.1	69.1921	1.88809	0.486378	3.88194	0.000103625	0.00199727	squamosa promoter binding protein-like
Soltu.DM.08G012580.1	323.817	1.88759	0.321471	5.87172	4.31309e-09	3.17045e-07	17.6 kDa class II heat shock protein
Soltu.DM.03G030010.1	95.9562	1.88528	0.258823	7.28405	3.23935e-13	6.01213e-11	expansin A15
Soltu.DM.01G020220.1	29.1294	1.87544	0.473455	3.96118	7.45806e-05	0.00151566	DUF4378 domain containing protein
Soltu.DM.03G001010.2	13.0536	1.87529	0.660567	2.8389	0.00452688	0.0407261	GDSL-like Lipase/Acylhydrolase superfamily protein
Soltu.DM.03G019800.1	37.5821	1.87425	0.411161	4.55842	5.15406e-06	0.000157543	O-methyltransferase family protein
Soltu.DM.11G001310.1	39.0322	1.86896	0.651486	2.86876	0.00412083	0.0378641	ethylene-responsive element binding factor
Soltu.DM.09G009430.1	300.519	1.86587	0.307464	6.06859	1.29041e-09	1.09466e-07	heat shock protein 17.4
Soltu.DM.08G003530.1	363.266	1.86144	0.159874	11.6432	2.48485e-31	4.63742e-28	growth-regulating factor
Soltu.DM.05G008750.1	71.795	1.85832	0.398231	4.66643	3.06474e-06	0.000101233	nuclear factor Y, subunit B6
Soltu.DM.02G017570.1	306.981	1.85505	0.286746	6.46933	9.84362e-11	1.07363e-08	Protein of unknown function (DUF506)
Soltu.DM.08G030090.1	36.7779	1.85473	0.347185	5.34222	9.18174e-08	4.70904e-06	glycosyl hydrolase 9B13
Soltu.DM.04G036030.1	102.323	1.84994	0.284029	6.5132	7.35681e-11	8.21054e-09	Walls Are Thin
Soltu.DM.06G017790.1	719.644	1.84672	0.276405	6.68121	2.3697e-11	2.92666e-09	Bifunctional inhibitor/lipid-transfer protein/seed storage 2S albumin superfamily protein
Soltu.DM.04G021800.1	2416.94	1.84626	0.254184	7.26347	3.77286e-13	6.92577e-11	myo-inositol-1-phosphate synthase
Soltu.DM.05G007570.1	39.0979	1.84118	0.630024	2.9224	0.0034735	0.0331398	O-Glycosyl hydrolases family 17 protein
Soltu.DM.10G001140.1	85.9038	1.82907	0.544907	3.35666	0.000788892	0.0104459	DEK domain-containing chromatin associated protein
Soltu.DM.08G001210.1	87.8292	1.82829	0.569076	3.21273	0.00131478	0.0157011	nitrate transporter 1.5
Soltu.DM.07G004180.1	42.0587	1.82571	0.589811	3.09541	0.00196539	0.0211171	peptide transporter
Soltu.DM.11G001390.1	17.7798	1.82139	0.629199	2.89477	0.00379433	0.0355545	SAUR-like auxin-responsive protein family
Soltu.DM.08G015510.1	5020.15	1.821	0.310368	5.86725	4.43081e-09	3.24279e-07	Protein of unknown function, DUF642
Soltu.DM.03G012810.1	2688.21	1.8207	0.331047	5.49984	3.80135e-08	2.14981e-06	plasma membrane intrinsic protein 1	4									up_in_NN
Soltu.DM.03G037330.1	65.7792	1.82065	0.59741	3.04758	0.00230695	0.0239633	HSP20-like chaperones superfamily protein
Soltu.DM.02G011000.1	31.1632	1.81997	0.521413	3.49046	0.000482186	0.00700912	UDP-Glycosyltransferase superfamily protein
Soltu.DM.05G022370.1	789.662	1.81631	0.406999	4.46269	8.09376e-06	0.000230809	Transmembrane amino acid transporter family protein
Soltu.DM.01G046100.1	13.0685	1.81304	0.631763	2.86982	0.00410711	0.0377818	AGAMOUS-like
Soltu.DM.02G007730.1	229.726	1.81278	0.4226	4.28958	1.7901e-05	0.000451768	transducin family protein / WD-40 repeat family protein
Soltu.DM.01G039690.1	151.369	1.80935	0.519263	3.48446	0.000493131	0.00713733	F-box family protein
Soltu.DM.06G023110.1	25.6572	1.80594	0.512052	3.52687	0.000420502	0.00629497	delta tonoplast integral protein
Soltu.DM.01G033710.1	83.0835	1.80539	0.605955	2.97941	0.00288807	0.0286192	plasma membrane intrinsic protein 1	5									up_in_NN
Soltu.DM.04G006770.1	111.598	1.80454	0.539147	3.34704	0.000816805	0.0107267	phosphoenolpyruvate carboxylase kinase
Soltu.DM.09G018920.1	35.275	1.79749	0.649806	2.7662	0.00567142	0.0484907	Subtilase family protein
Soltu.DM.02G012290.1	80.8041	1.79612	0.331301	5.42141	5.91307e-08	3.22988e-06	Argonaute family protein
Soltu.DM.09G017200.1	63.8754	1.79494	0.537886	3.33702	0.000846805	0.0110045	cytochrome P450, family 82, subfamily G, polypeptide
Soltu.DM.06G011420.1	973.257	1.79262	0.203835	8.79448	1.43708e-18	6.03447e-16	expansin A8
Soltu.DM.01G031610.1	209.823	1.79084	0.264172	6.77905	1.20969e-11	1.55698e-09	Bifunctional inhibitor/lipid-transfer protein/seed storage 2S albumin superfamily protein
Soltu.DM.02G024530.1	144.925	1.76869	0.337994	5.23292	1.66855e-07	8.01854e-06	beta-galactosidase
Soltu.DM.02G023240.1	2994.63	1.76435	0.423418	4.16693	3.08726e-05	0.000711318	Rhodanese/Cell cycle control phosphatase superfamily protein
Soltu.DM.10G019370.1	25.1835	1.76212	0.473155	3.72419	0.000195946	0.00338776	tetratricopeptide repeat (TPR)-containing protein
Soltu.DM.05G010370.1	176.973	1.75718	0.490208	3.58456	0.000337643	0.00526821	Pectate lyase family protein
Soltu.DM.01G047220.1	28.6699	1.75616	0.432947	4.05629	4.9859e-05	0.00107663	Protein of unknown function (DUF579)
Soltu.DM.09G003720.1	629.033	1.75171	0.213282	8.21312	2.1552e-16	6.58178e-14	conserved hypothetical protein
Soltu.DM.02G018150.1	141.261	1.75147	0.191968	9.12375	7.25707e-20	3.80917e-17	conserved hypothetical protein
Soltu.DM.06G033670.1	22.1907	1.7511	0.558047	3.13792	0.00170153	0.0189827	conserved hypothetical protein
Soltu.DM.02G010740.1	103.792	1.75065	0.387371	4.51931	6.20419e-06	0.000184114	conserved hypothetical protein
Soltu.DM.10G005320.1	36.89	1.74539	0.579815	3.01026	0.00261028	0.0263958	conserved hypothetical protein
Soltu.DM.06G025880.1	93.7319	1.7396	0.373372	4.65916	3.17496e-06	0.000104463	Gibberellin-regulated family protein
Soltu.DM.05G021220.1	61.2712	1.73694	0.252326	6.88371	5.83137e-12	8.44368e-10	alpha/beta-Hydrolases superfamily protein
Soltu.DM.03G019530.1	73.1347	1.73644	0.563673	3.08058	0.00206597	0.0219627	hypothetical protein
Soltu.DM.10G013080.1	346.231	1.72985	0.412366	4.19494	2.72945e-05	0.000641463	HVA22 homologue A
Soltu.DM.12G010130.1	29.4714	1.72423	0.361527	4.76931	1.84862e-06	6.47558e-05	conserved hypothetical protein
Soltu.DM.09G001450.1	407.729	1.72263	0.146028	11.7965	4.06768e-32	8.03798e-29	RHO guanyl-nucleotide exchange factor
Soltu.DM.05G011910.3	161.852	1.722	0.388853	4.42841	9.49283e-06	0.000264764	squamosa promoter binding protein-like
Soltu.DM.09G017040.2	13.1356	1.71887	0.591098	2.90792	0.00363839	0.0343906	O-Glycosyl hydrolases family 17 protein
Soltu.DM.02G028040.1	398.615	1.71385	0.393993	4.34996	1.36164e-05	0.000363605	hypothetical protein
Soltu.DM.02G010660.1	99.4279	1.70833	0.283766	6.02019	1.74211e-09	1.42046e-07	zinc finger (C3HC4-type RING finger) family protein
Soltu.DM.09G002770.1	98.8004	1.69929	0.472499	3.59639	0.000322659	0.00508899	glycosyl hydrolase 9B1
Soltu.DM.01G048570.1	298.282	1.69518	0.480846	3.52542	0.000422816	0.00632679	2-oxoglutarate (2OG) and Fe(II)-dependent oxygenase superfamily protein
Soltu.DM.02G016120.2	12.0083	1.68756	0.602314	2.80179	0.00508203	0.0445629	Protein of unknown function, DUF538
Soltu.DM.09G022840.1	65.8168	1.68608	0.467224	3.60872	0.000307707	0.0049036	Sar8.2 family domain containing protein
Soltu.DM.10G023230.2	103.226	1.68586	0.337926	4.98886	6.07367e-07	2.48517e-05	Pathogenesis-related thaumatin superfamily protein
Soltu.DM.10G019690.1	18.2275	1.67497	0.53172	3.1501	0.00163215	0.0184361	hypothetical protein
Soltu.DM.04G034410.1	143.813	1.66544	0.462333	3.60226	0.000315466	0.00500351	Serine protease inhibitor (SERPIN) family protein
Soltu.DM.04G032220.1	337.405	1.66473	0.495047	3.36277	0.000771632	0.0102497	growth-regulating factor
Soltu.DM.06G018640.1	96.3447	1.66341	0.476648	3.4898	0.000483375	0.00702033	hypothetical protein
Soltu.DM.04G023540.2	65.5333	1.66153	0.549383	3.02435	0.00249164	0.0254877	WRKY DNA-binding protein
Soltu.DM.07G012610.2	32.3825	1.66091	0.585087	2.83874	0.00452922	0.0407363	OBP3-responsive gene
Soltu.DM.05G010770.1	863.507	1.65652	0.481233	3.44225	0.000576895	0.00814613	multidrug resistance-associated protein
Soltu.DM.01G048850.1	101.584	1.65428	0.364419	4.53949	5.63899e-06	0.000169573	Cysteine/Histidine-rich C1 domain family protein
Soltu.DM.06G009650.1	36.3589	1.65073	0.488201	3.38125	0.000721565	0.00969953	Plant protein of unknown function (DUF828)
Soltu.DM.08G004870.1	38.9772	1.64793	0.450592	3.65725	0.000254934	0.00421457	myb domain protein
Soltu.DM.01G032560.1	38.2183	1.64081	0.337053	4.8681	1.12674e-06	4.20563e-05	conserved hypothetical protein
Soltu.DM.03G036710.1	1154.46	1.63758	0.223598	7.32376	2.41113e-13	4.60211e-11	Bifunctional inhibitor/lipid-transfer protein/seed storage 2S albumin superfamily protein
Soltu.DM.03G019910.1	383.539	1.62867	0.263982	6.16961	6.84569e-10	6.21533e-08	O-methyltransferase family protein
Soltu.DM.06G028370.1	64.9886	1.62812	0.552132	2.94879	0.00319026	0.0310099	SPFH/Band 7/PHB domain-containing membrane-associated protein family
Soltu.DM.02G032910.1	204.564	1.62747	0.410499	3.9646	7.35179e-05	0.00149951	Tetratricopeptide repeat (TPR)-like superfamily protein
Soltu.DM.12G010400.1	66.9733	1.62539	0.237837	6.83405	8.2551e-12	1.12273e-09	Major facilitator superfamily protein
Soltu.DM.02G021340.3	173.835	1.62073	0.424307	3.81971	0.00013361	0.0024702	nijmegen breakage syndrome
Soltu.DM.03G035660.1	146.037	1.61982	0.238038	6.80487	1.01139e-11	1.33762e-09	conserved hypothetical protein
Soltu.DM.12G029600.1	2912.08	1.61854	0.196019	8.25704	1.49335e-16	4.77772e-14	Aluminium induced protein with YGL and LRDR motifs
Soltu.DM.11G007720.1	1048.89	1.61816	0.38785	4.17214	3.01755e-05	0.000696691	GDSL-like Lipase/Acylhydrolase superfamily protein
Soltu.DM.09G010290.1	609.648	1.61313	0.265963	6.06524	1.31757e-09	1.11209e-07	serine/threonine protein kinase
Soltu.DM.01G041210.1	30.4491	1.6114	0.578107	2.78737	0.0053137	0.0461561	myb domain protein
Soltu.DM.02G014010.1	655.276	1.60959	0.365594	4.40266	1.06932e-05	0.000295004	chlorophyll A/B binding protein
Soltu.DM.01G032710.1	48.951	1.60903	0.39523	4.07113	4.67854e-05	0.00101726	AGAMOUS-like
Soltu.DM.06G000240.1	80.4338	1.60602	0.368438	4.359	1.30656e-05	0.000350473	sequence-specific DNA binding transcription factors	transcription regulators									up_in_NN
[truncated: 1,514 more rows]

## Sheet: DEGs_+N_CLE4(G6T)_control_root
Differentially expressed genes (DEGs) in WT relative to StCLE4(G6T) in roots from nitrogen-rich media grown plants.
[truncated: 393 more rows]

[truncated: 1 more sheets: DEGs_-N_CLE4oe_control_root]
